# Supplementary material for: GWAS to Identify Novel QTNs for WSCs Accumulation in Wheat Peduncle Under Different Water Regimes
Source: Frontiers journal article supplement (doi:10.3389/fpls.2022.825687), 2022-03-03
Supplement: Data_Sheet_1.PDF [file Data_Sheet_1.PDF]

(A)

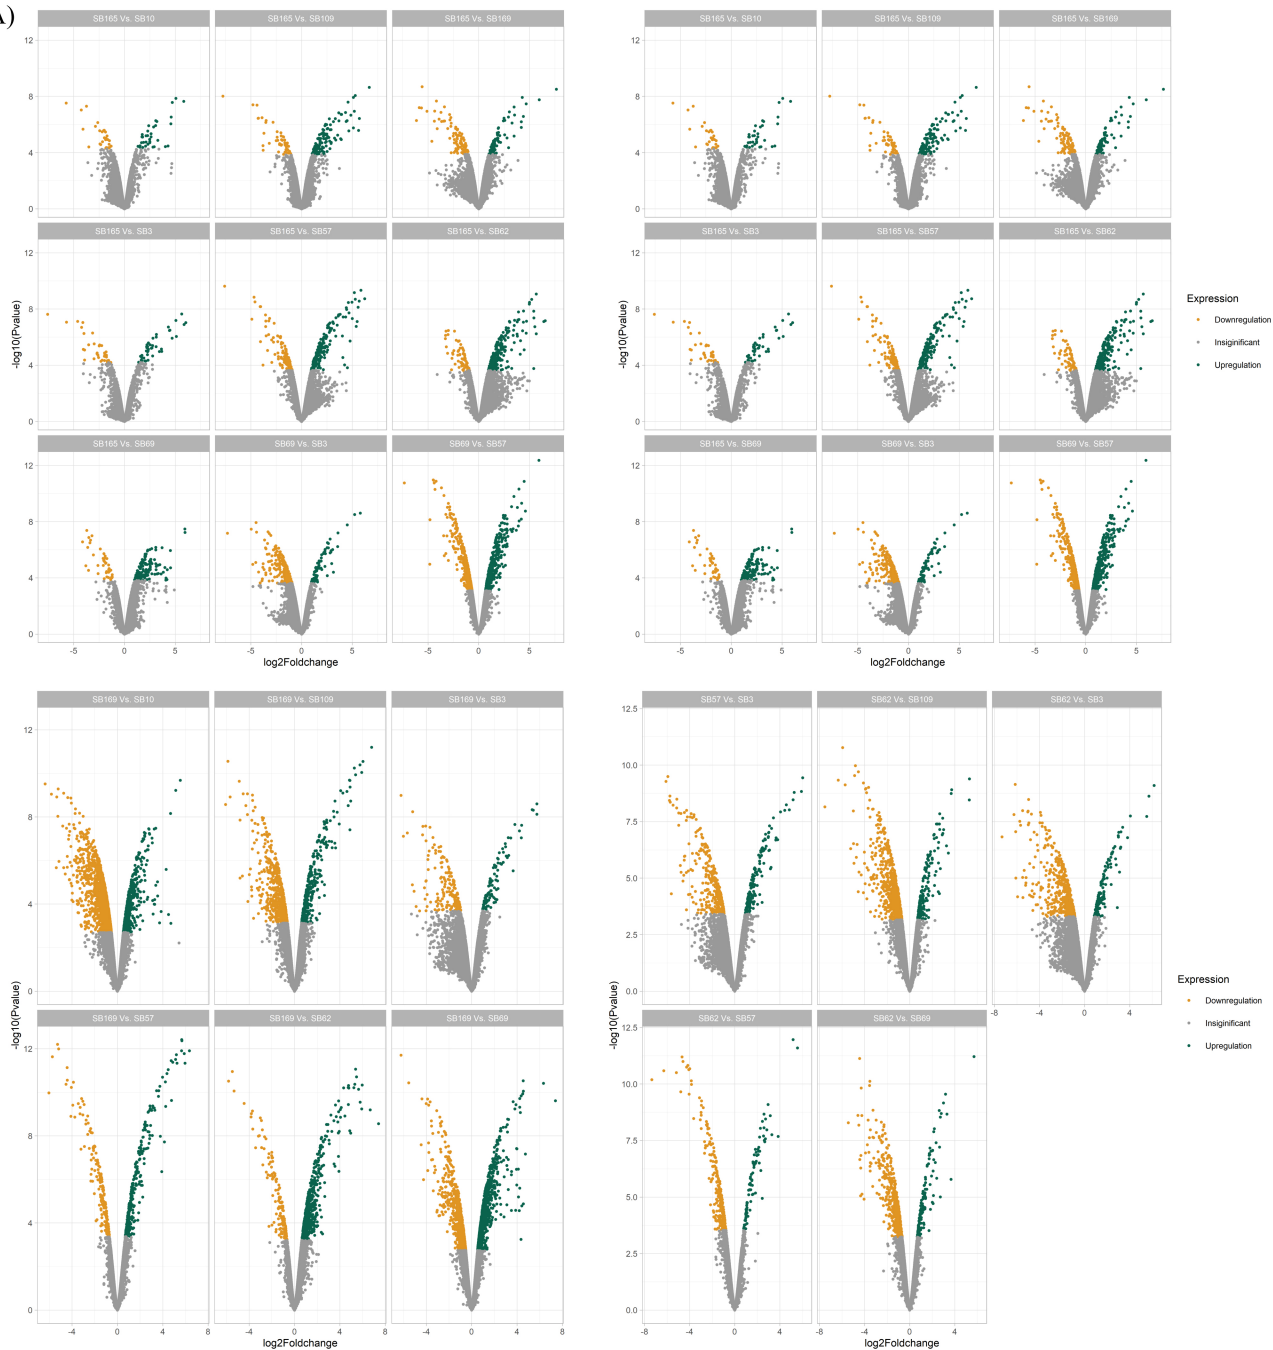

(B)

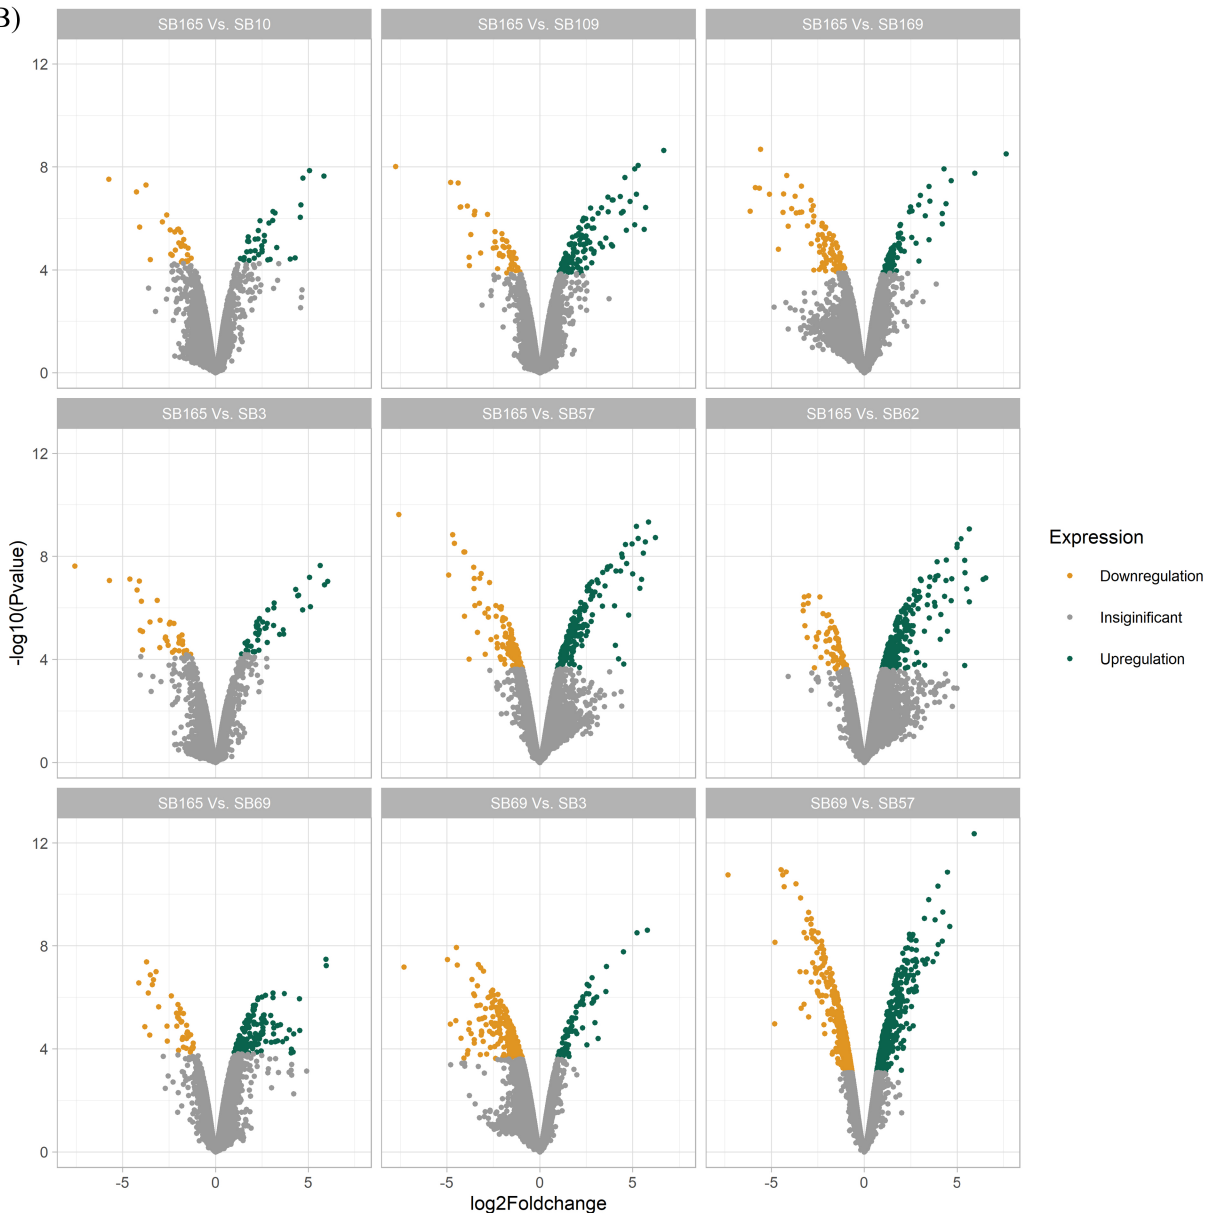

**Figure S2:** The volcano plots showing differentially expressed genes (DEGs) in the tissue of (A) peduncle of eight lines of Seri/Bebax contrasting for total stem WSCs and treated with the rainfed environment and (B) flag leaf of WL-711 (high yielding drought-sensitive) and C-306 (high yielding drought tolerant) genotypes treated with well-watered and complete drought stress environments. The negative  $\log_{10}$  transformed FDR values test the null hypothesis of no difference in expression levels between high and low wheat genotype (y-axis) and are plotted against the average  $\log$  fold changes (FC) in expression (x-axis). Insignificant DEGs are plotted in grey. In orange and green are significant ( $p \geq 0.05$ ) DEGs and represented as down- and up-regulated genes, respectively.





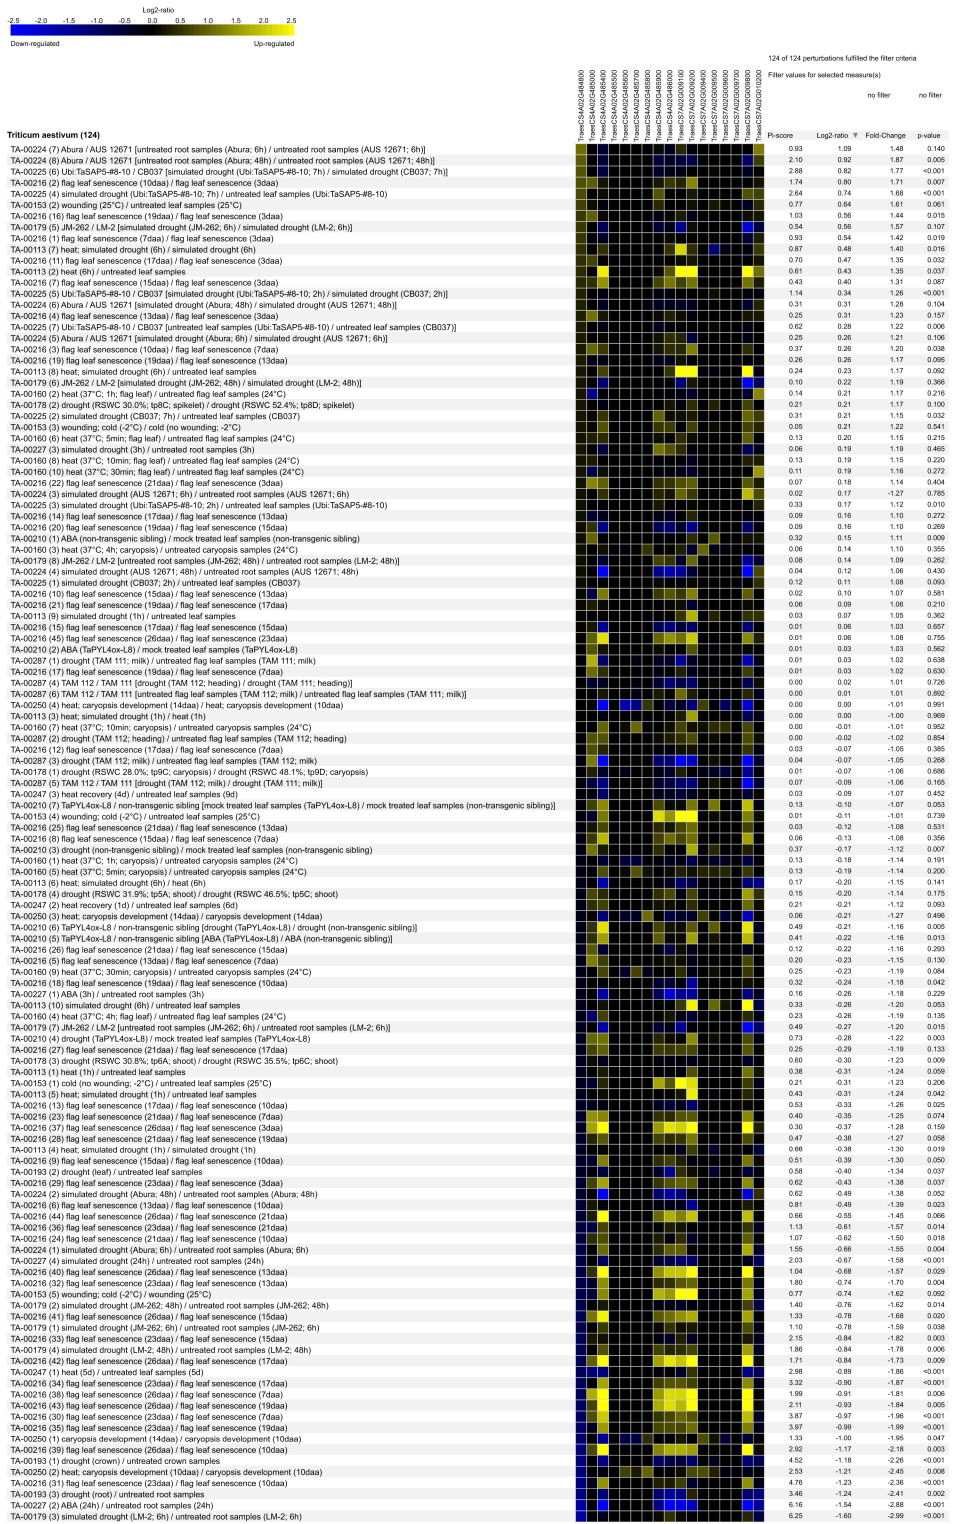

**Figure S4:** mRNA based differential expression of fructans metabolic genes reported in the QTNs region *qWSC-4A.2* and *qWSC-7A.2* at 124 drought and related perturbations in various samples of *Triticum aestivum* as retrieved from Genevestigator

(A)

| Sequence ID             | Alignment                                                                                     | End |
|-------------------------|-----------------------------------------------------------------------------------------------|-----|
|                         | 1 10 20 30 40 44                                                                              |     |
| ArT.BF.1 (+)            | N W R S Q P P A F N P S Q P S D I L N G C W S G S V T L L P N G K P V I L Y T G L D Q N K     | 44  |
| TraesCS4A02G4854(+) (+) | Q W R T L P I A M V A D Q W Y D I L G V L S G S M T V L L P N G T V I M I Y T G A T N A S     | 44  |
| TrT.6SFT (+)            | Q W R T L P I A M V A D Q W Y D I L G V L S G S M T V L L P N G T V I M I Y T G A T N A S     | 44  |
| AeS.6SFT (+)            | Q W R T L P I A M V A D Q W Y D I L G V L S G S M T V L L P N G T V I M I Y T G A T N A S     | 44  |
| TraesCS7A02G0098(+) (+) | T W R T L P I A M V A D Q W Y D I L G V L S G S M T V L L P N G T V I M I Y T G A T N A S     | 44  |
| Tu.6SFT (+)             | T W R T L P I A M V A D Q W Y D I L G V L S G S M T V L L P N G T V I M I Y T G A T N A S     | 44  |
| AeT.6SFT (+)            | T W R T L P I A M V A D Q W Y D I L G V L S G S M T V L L P N G T V I M I Y T G A T N A S     | 44  |
| BrR.6FEH.1 (+)          | N W T Q L E P A L S P S E S Y D I N S C W S G S A T T L L P D G K P V I L Y T G L D N Q E     | 44  |
| ArL.6FEH.1 (+)          | N W T Q L E P A L S P S E S Y D I N S C W S G S A T T L L P D G K P V I L Y T G L D N Q E     | 44  |
| ArT.BF.3 (+)            | N W T Q L E P A L S P S E S Y D I N S C W S G S A T T L L P D G K P V I L Y T G L D N Q E     | 44  |
| BeV.6FEH.1 (+)          | N W T Q L E P A L S P S E S Y D I N S C W S G S A T T L L P D G K P V I L Y T G L D N Q E     | 44  |
| TraesCS4A02G4855(+) (+) | N W R S L P L A M V P E H W Y D I N G V L T G S A T T L L P S G K V V I L Y T G N T N A S     | 44  |
| SoB.1SST.1 (+)          | N W R H L P L A M V P D Q W Y D I N G V L T G S A T T L L P D G K P V I L Y T G L D N Q E     | 44  |
| TraesCS7A02G0097(+) (+) | N W R S L P L A M V P E H W Y D I N G V L T G S A T T L L P S G K V V I L Y T G N T N A S     | 44  |
| BrR.6FEH.3 (+)          | N W T Q L E P A L S P S E S Y D I N S C W S G S A T T L L P D G K P V I L Y T G L D N Q E     | 44  |
| BrO.6FEH.1 (+)          | N W T Q L E P A L S P S E S Y D I N S C W S G S A T T L L P D G K P V I L Y T G L D N Q E     | 44  |
| ArT.BF.2 (+)            | N W T P L D P A L F A P S A P E D I N G C W S G S A T T L L P N G K P V I L Y T G L D P K N   | 44  |
| HeA.6FEH.2 (+)          | N W T P L D P A L F A P S A P E D I N G C W S G S A T T L L P N G K P V I L Y T G L D P K N   | 44  |
| Ta.1FEHw1 (+)           | N W T G L E P A L V R D T P S D I D G C W T G S V T L L P G G K P V I L Y T G D K D Q         | 44  |
| Ta.1FEHw2 (+)           | N W T G L E P A L V R D T P S D I D G C W T G S V T L L P G G K P V I L Y T G D K D Q         | 44  |
| BeV.6FEH.3 (+)          | N W T S Q P I A L S P T E P Y D I K G C W S G S A T T L L T G D K P A V I L Y T G D D E R D   | 44  |
| HeA.6FEH.1 (+)          | N W T P L D I A L P A F P F D I L S C W S G S A T T L L P G N K P V I L Y T G L D S E N       | 44  |
| GIM.6FEH.2 (+)          | N W T H L N H I L E P S E S Y D I N G C Y S G S I T T L L P V E K P V I L Y T G S D T N K     | 44  |
| BeV.6FEH.2 (+)          | N W V P Q P L T M F E P E M A A N T I N G S W S G S A T T L L P G N K P V I L Y T G L D P K Y | 44  |
| TraesCS4A02G4848(+) (+) | H W R H L P L A M V P D Q W Y D I N G V L T G S A T T V L L P D G S L V M L Y T G S T N A S   | 44  |
| Tu.1SST (+)             | H W R H L P L A M V P D Q W Y D I K G V L T G S A T T V L L P D G K V I L L Y T G N T E T F   | 44  |
| TrT.1SST (+)            | H W R H L P L A M V P D Q W Y D I K G V L T G S A T T V L L P D G K V I L L Y T G N T E T F   | 44  |
| AeT.1SST (+)            | H W R H L P L A M V P D Q W Y D I K G V L T G S A T T V L L P D G K V I L L Y T G N T E T F   | 44  |
| TraesCS4A02G4860(+) (+) | H W R H L P L A M V P D Q W Y D I K G V L T G S A T T V L L P D G K V I L L Y T G N T E T F   | 44  |
| TraesCS4A02G4859(+) (+) | H W R H L P L A M V P D Q W Y D I K G V L T G S A T T V L L P D G K V I L L Y T G N T E T F   | 44  |
| TraesCS7A02G0092(+) (+) | H W R H L P L A M V P E H W Y D I E G V L T G S I T T V L L P D G R V I L L Y T G N T E T F   | 44  |
| Tu.1FFT (+)             | H W R H L P L A M V P E H W Y D I E G V L T G S I T T V L L P D G R V I L L Y T G N T E T F   | 44  |
| TrT.1FFT (+)            | H W R H L P L A M V P E H W Y D I E G V L T G S I T T V L L P D G R V I L L Y T G N T E T F   | 44  |
| AeS.1FFT (+)            | H W R H L P L A M V P E H W Y D I E G V L T G S I T T V L L P D G R V I L L Y T G N T E T F   | 44  |
| AeS.1SST (+)            | H W R H L P L A M V P D Q W Y D I K G V L T G S N T T V L L P D G K V I L L Y T G N T E T F   | 44  |
| TraesCS7A02G0102(+) (+) | H W R H L P L A M V P D Q W Y D I N G V L T G S A T T V L L P D G K V I L L Y T G N T E T F   | 44  |
| TraesCS7A02G0091(+) (+) | H W R H L P L A M V P D Q W Y D I K G V L T G S A T T V L L P D G K V I L L Y T G N T E T F   | 44  |
| TraesCS7A02G0094(+) (+) | H W R H L P L A M V P D Q W Y D I K G V L T G S A T T V L L P N G T V I L L Y T G K T D T S   | 44  |
| TraesCS4A02G4858(+) (+) | H W R H L P L A M V P D Q W Y D I K G V L T G S A T T V L L P N G T V I L L Y T G K T D T S   | 44  |
| TraesCS4A02G4857(+) (+) | H W R H L P L A M V P D Q W Y D I N G V L T G S A T T M L L P N G T V I L L Y T G N S E T F   | 44  |
| TraesCS4A02G4856(+) (+) | H W R H L P L A M V P D R W Y D I N G V L T G S A T T M L L P D G K V I L L Y T G N S D T F   | 44  |
| TraesCS7A02G0095(+) (+) | H W R H L P L A M V P D Q W Y D I N G V L T G S A T T M L L P N G T V I L L Y T G N S D T F   | 44  |
| TraesCS7A02G0096(+) (+) | H W R H L P L A M V P D R W Y D I E G V L T G S A T T V L L P N G K V I L L Y T G N S D T F   | 44  |
| AeT.1FFT (+)            | R W R H L P L A M S P D Q W Y D I N G V L T G S A T T V L L P N G T I L A M L Y T G S T N A S | 44  |
| BrD.1SST.1 (+)          | R W R H L P L A M S P D Q W Y D I N G V L T G S A T T V L L P N G T I L A M L Y T G S T N A S | 44  |
| BrD.1SST.3 (+)          | H W R H L P L A M V P D R W Y D V N G V L T G S A T T V L L P D G S L V M L Y T G S T N A S   | 44  |
| BrD.1SST.2 (+)          | H W R H L P L A M V P D R W Y D V N G V L T G S A T T V L L P D G S L V M L Y T G S T N A S   | 44  |

(B)

| Sequence ID             | Alignment                                                                                                 | End |
|-------------------------|-----------------------------------------------------------------------------------------------------------|-----|
|                         | 1 10 20 30 40 50                                                                                          |     |
| HeA.6FEH.1 (+)          | L R Y D Y G K Y Y A S K S F F D P V K N R R I L A W V N E S D S Q A D D V A K G W S G V H S F P R         | 50  |
| TraesCS4A02G4855(+) (+) | L R Y N W G K L F A S T S F Y D P A K R R R V S W G Y V G E T D S N C T D I A K G W A N L Q A I P R       | 50  |
| TraesCS4A02G4850(+) (+) | L R Y D W G K L F A S S S F Y D P V K R R R I L M G Y V G E V D S V Q A D V A K G W A S L Q S V P R       | 50  |
| TraesCS7A02G0096(+) (+) | L R Y D W G K F F A S T S F Y D P V K R R R V S W G Y V G E T D S N R T D I A K G W A N L Q A I P R       | 50  |
| ArL.6FEH.1 (+)          | L R Y D Y G K F Y A S K A F F D S V K N R R I L W G W V E T D S S K E D D F K K G W A G L M S L P R       | 50  |
| TraesCS7A02G0095(+) (+) | L R Y D W G K F Y A S S S F Y D P V K R R R V S W G F V G E T D S P N T D I A K G W A S L Q G I P R       | 50  |
| TraesCS4A02G4857(+) (+) | L R Y D W G K F Y A S S S F Y D P V K R R R V S W G F V G E T D S P N T D I A K G W A S L Q G I P R       | 50  |
| GIM.6FEH.1 (+)          | L R L D Y G K Y Y A S K S F F D H A K N R R I L W G W V N E C D T R Q N D I E K G W A G L Q C I P R       | 50  |
| TraesCS7A02G0094(+) (+) | L R Y D W G K L F A S T S F Y D P V K R R R V M W A Y V G E T D S L S A N V A K G W A S V Q I T P R       | 50  |
| TraesCS4A02G4858(+) (+) | L R Y D W G K L F A S T S F Y D P V K R R R V M W A Y V G E T D S L S A N V A K G W A S V Q I T P R       | 50  |
| TraesCS7A02G0097(+) (+) | L R Y D W G K L F A S S S F Y D P V K R R R V S W G Y V G E T D S N R T D I A K G W A N L Q A I P R       | 50  |
| HeA.6FEH.2 (+)          | L R Y D Y G K Y Y A S K A F F D P V K N R R I L M G W V N E S D S D E D I A H A K G W S G L Q S F P R     | 50  |
| BrO.6FEH.1 (+)          | L R Y D H G K F Y A S K A F F D P V K N R R I L M G W V V E T D S V E D D I A K G W S G L S L P R         | 50  |
| TraesCS7A02G4856(+) (+) | L R Y N W G K L F A S T S F Y D P A K R R R V M W A Y V G E T D S N R T D I A K G W A N L Q A I P R       | 50  |
| ArT.BF.3 (+)            | L R Y D H G K F Y A S K A F F D S V K N R R I L W G W V I E T D S K E D D F K K G W A N L Q A I P R       | 50  |
| ArT.BF.2 (+)            | P R Y D Y G K Y Y A S K T I F F D S A K N R R I L W G W V N E S S S V E D D V E K G W A S G L Q I T P R   | 50  |
| BrR.6FEH.1 (+)          | L R Y D W G K F Y A S K S F F D S A K N R R I L W G W V V E T D S R E D D I E K G W A S G L L G I P R     | 50  |
| BrR.6FEH.3 (+)          | L R Y D H G K F Y A S K A F F D S V K N R R I L W G W V I E T D S V E D D I E K G W A S G L L S L P R     | 50  |
| Ta.1FEHw2 (+)           | L R I D Y G K F Y A S K S F F D S N K N R R I L W G W S R E T D S P S D D L E K G W A S G L H T I P R     | 50  |
| Ta.1FEHw1 (+)           | L R I D Y G K F Y A S K S F F D S N K N R R I L W G W S R E T D S P S D D L E K G W A S G L H T I P R     | 50  |
| BeV.6FEH.1 (+)          | L R Y D Y G K F Y A S K S F F D D E T I N R R I L W G W V N E S S T Q A D D I K K G W S G V Q A I P R     | 50  |
| ArT.BF.1 (+)            | P R L D Y G K Y Y A S K T I F F D D V K K R R I L W G W V N E S S S P A K D D I E K G W A S G L Q S F P R | 50  |
| GIM.6FEH.2 (+)          | L I L D H G K F Y A S K S F F D N A K K R R I L W G W S K E C D T T Q D D Y E K G W A S L Q S I P R       | 50  |
| BeV.6FEH.2 (+)          | L R Y D Y G K Y Y A S K T I F F D N A K K R R I L W G W A N E S S S V E D D I K K G W A S G L H T I P R   | 50  |
| BeV.6FEH.4 (+)          | L R L D Y G K F Y A S K S F F D S K T D R R I L F A W A D E S S T E A N N F E K G W A S G L Q I P R       | 50  |
| BeV.6FEH.3 (+)          | L R L D Y G K F Y A A K S F F D S K T D R R I L F W V N E A C T E A D A I N R G W A S G L Q I P R         | 50  |
| TraesCS7A02G0098(+) (+) | L R Y D W G K F Y A S T S F Y D P A K K R R R V L M G Y V G E V D S K R A D V V K G W A S L Q S V P R     | 50  |
| BrD.1SST.2 (+)          | L R Y D W G K F Y A S K T I F Y D P A K K R R V L W G W V G E T D S E R A D V A K G W A S L Q S L P R     | 50  |
| BrD.1SST.1 (+)          | L R Y D W G K F Y A S K T I F Y D P A K K R R V L W G W V G E T D S E R A D V A K G W A S L Q S L P R     | 50  |
| TraesCS7A02G0091(+) (+) | L R Y D W G K Y Y A S K S F Y D P V K R R R V V W A Y V G E T D S E R A D I T T K G W A N L Q S T I P R   | 50  |
| Tu.1SST (+)             | L R Y D W G K Y Y A S K S F Y D P V K R R R V V W A Y V G E T D S E R A D I T T K G W A N L Q S T I P R   | 50  |
| TrT.1SST (+)            | L R Y D W G K Y Y A S K S F Y D P V K R R R V V W A Y V G E T D S E R A D I T T K G W A N L Q S T I P R   | 50  |
| AeT.1SST (+)            | L R Y D W G K Y Y A S K S F Y D P V K R R R V V W A Y V G E T D S E R A D I T T K G W A N L Q S T I P R   | 50  |
| AeS.1SST (+)            | L R Y D W G K Y Y A S K S F Y D P V K R R R V V W A Y V G E T D S E R A D I T T K G W A N L Q S T I P R   | 50  |
| TraesCS4A02G4860(+) (+) | L R Y D W G K F Y A S K S F Y D P V K R R R V V W A Y V G E T D S E R A D I T T K G W A N L Q S T I P R   | 50  |
| SeL.1SST.1 (+)          | L R Y D W G K F Y A S K T I F Y D P A K K R R V W G W V G E T D S E R A D V S A K G W A S L Q S T I P R   | 50  |
| TraesCS7A02G0102(+) (+) | L R Y D W G K F Y A S K T I F Y D P S K N R R V L W G W V G E T D S E R A D V A K G W A S L Q S T I P R   | 50  |
| TraesCS4A02G4848(+) (+) | L R Y D W G K F Y A S K T I F Y D P A K K R R V L W G W V G E T D S E R A D V A K G W A S L Q S T I P R   | 50  |
| SoB.1SST.1 (+)          | L R Y D W G K F Y A S K T I F Y D P A K K R R V L W G W V G E T D S E R A D V A K G W A S L Q S T I P R   | 50  |
| BrD.1SST.3 (+)          | L R Y D W G K Y Y A S K T I F Y D P A K K R R V V W G W V G E T D S E R A D V A K G W A S L Q S L P R     | 50  |
| TraesCS4A02G4854(+) (+) | L R Y D W G K F Y A S T S F Y D P A K K R R R V M G Y V G E V D S K R A D V V K G W A S L Q S V P R       | 50  |
| Tu.6SFT (+)             | L R Y D W G K F Y A S T S F Y D P A K K R R R V M G Y V G E V D S K R A D V V K G W A S L Q S V P R       | 50  |
| TrT.6SFT (+)            | L R Y D W G K F Y A S T S F Y D P A K K R R R V M G Y V G E V D S K R A D V V K G W A S L Q S V P R       | 50  |
| HoV.6SST.1 (+)          | L R Y D W G K F Y A S T S F Y D P A K K R R R V M G Y V G E V D S K R A D V V K G W A S L Q S V P R       | 50  |
| AeT.6SFT (+)            | L R Y D W G K F Y A S T S F Y D P A K K R R R V M G Y V G E V D S K R A D V V K G W A S L Q S V P R       | 50  |
| AeS.6SFT (+)            | L R Y D W G K F Y A S T S F Y D P A K K R R R V M G Y V G E V D S K R A D V V K G W A S L Q S V P R       | 50  |
| AeT.1FFT (+)            | L R Y D Y G R Y D A S K S F Y D P V K K R R I V W G Y V V E T D S W S A D A A K G W A N L Q S T I P R     | 50  |
| TraesCS7A02G0092(+) (+) | L R Y D Y G R Y D A S K S F Y D P V K K R R I V W G Y V V E T D S W S A D A A K G W A N L Q S T I P R     | 50  |
| TraesCS4A02G4859(+) (+) | L R Y D Y G R Y D A S K S F Y D P V K K R R I V W G Y V V E T D S W S A D A A K G W A N L Q S T I P R     | 50  |
| AeS.1FFT (+)            | L R Y D Y G R Y D A S K S F Y D P V K K R R I V W G Y V V E T D S W S A D A A K G W A N L Q S T I P R     | 50  |
| Tu.1FFT (+)             | L R Y D Y G R Y D A S K S F Y D P V K K R R I V W G Y V V E T D S W S A D A A K G W A N L Q S T I P R     | 50  |
| TrT.1FFT (+)            | L R Y D Y G R Y D T S K S F Y D P V K K R R I V W G Y V V E T D S W S A D A A K G W A N L Q S T I P R     | 50  |

(C)

| Sequence ID           | Alignment                                                                             | End |
|-----------------------|---------------------------------------------------------------------------------------|-----|
|                       | 1 10 20 30 41                                                                         |     |
| TraesCS4A02G48570(++) | S E M L Q W Q R T G Y H F Q P D G N F M N D P N A P M Y Y R G L Y H F F Y Q Y N P     | 41  |
| AeT.1FFT              | (+) S A M L Q W Q R T G F H F Q P D K N Y M N D P N G P V Y Y R G W Y H F F Y Q Y N P | 41  |
| SoB.1SST.1            | (+) N A M L Q W Q R T G F H F Q P H M N Y M N D P N G P V Y Y R G W Y H F F Y Q Y N P | 41  |
| TraesCS4A02G48540(++) | N E M L Q W Q R S G Y H F Q T A K N Y M S D P N G L M Y Y R G W Y H F F Y Q Y N P     | 41  |
| AeS.6SFT              | (+) N E M L Q W Q R S G Y H F Q T A K N Y M S D P N G L M Y Y R G W Y H F F Y Q Y N P | 41  |
| TraesCS7A02G00980(++) | N E M L Q W Q R S G Y H F Q T A K N Y M S D P N G L M Y Y R G W Y H F F Y Q Y N P     | 41  |
| Tu.6SFT               | (+) N E M L Q W Q R S G Y H F Q T A K N Y M S D P N G L M Y Y R G W Y H F F Y Q Y N P | 41  |
| AeT.6SFT              | (+) N E M L Q W Q R S G Y H F Q T A K N Y M S D P N G L M Y Y R G W Y H F F Y Q Y N P | 41  |
| TrT.6SFT              | (+) N E M L Q W Q R S G Y H F Q T A K N Y M S D P N G L M Y Y R G W Y H F F Y Q Y N P | 41  |
| BrD.1SST.2            | (+) N A M L Q W Q R T G F H F Q P E K N Y M N D P N G P V Y Y R G W Y H F F Y Q Y N P | 41  |
| GIM.6FEH.2            | (+) V E K Q P Y R T W Y H F Q P P Q N W M N D P N G P M Y Y R G W Y H F F Y Q Y N P   | 41  |
| GIM.6FEH.1            | (+) V E K Q P Y R T W Y H F Q P P Q N W M N D P N G P M Y Y R G W Y H F F Y Q Y N P   | 41  |
| HeA.6FEH.2            | (+) S P S D Q P Y R T S F H F Q V P K N W M N D P N G P M Y Y R G W Y H F F Y Q Y N P | 41  |
| HeA.6FEH.1            | (+) S P S D Q P Y R T A F H F Q P P Q N W M N D P N G P M Y Y R G W Y H F F Y Q Y N P | 41  |
| BeV.6FEH.2            | (+) P P T N Q P Y R T A Y H F Q P R K N W M N D P N G P M Y Y R G W Y H F F Y Q Y N P | 41  |
| ArL.6FEH.1            | (+) L Q D N Q L N R T S F H F Q P Q R N W M N D P N A P M Y Y R G F Y H F F Y Q Y N P | 41  |
| BeV.6FEH.1            | (+) L N D D P Y R T A Y H F Q S P K N W M N D P N G P M Y Y R G F Y H F F Y Q Y N P   | 41  |
| Ta.1FEHw2             | (+) P A V S T M Y K T A F H F Q P A K N W M N D P S G P M Y Y R G L Y H F F Y Q Y N P | 41  |
| TraesCS7A02G00970(++) | N A M L Q W Q R T G F H F Q P D K H Y M N D P N A P M Y Y R G W Y H F F Y Q Y N P     | 41  |
| TraesCS4A02G48590(++) | N A M L Q W Q R T G F H F Q P E K N Y M N D P N G P V Y Y R G W Y H F F Y Q Y N P     | 41  |
| TraesCS7A02G00920(++) | N A M L Q W Q R T G Y H F Q P E K N Y Q N D P N G P V Y Y R G W Y H F F Y Q Y N P     | 41  |
| Tu.1FFT               | (+) N A M L Q W Q R T G Y H F Q P E K N Y Q N D P N G P V Y Y R G W Y H F F Y Q Y N P | 41  |
| TrT.1FFT              | (+) N A M L Q W Q R T G Y H F Q P E K N Y Q N D P N G P V Y Y R G W Y H F F Y Q Y N P | 41  |
| AeS.1FFT              | (+) N A M L Q W Q R T G Y H F Q P E K N Y Q N D P N G P V Y Y R G W Y H F F Y Q Y N P | 41  |
| BrD.1SST.1            | (+) N A M L Q W Q R T G F H F Q P E K N Y M N D P N G P V Y Y R G W Y H F F Y Q Y N P | 41  |
| TraesCS7A02G01020(++) | N A M L Q W Q R T G F H F Q P E K N W M N D P N G P V Y Y R G W Y H F F Y Q Y N P     | 41  |
| TraesCS4A02G48480(++) | N A M L Q W Q R T G F H F Q P E K N Y M N D P N G P V Y Y R G W Y H F F Y Q Y N P     | 41  |
| TraesCS4A02G48560(++) | N A M L Q W Q R T G Y H F Q P E K N Y M N D P N A P M Y Y R G W Y H F F Y Q Y N P     | 41  |
| TraesCS7A02G00940(++) | N E M L Q W Q R T G F H F Q P E K N Y M N D P N A P M Y Y R G R Y H F F Y Q Y N P     | 41  |
| TraesCS4A02G48580(++) | N E M L Q W Q R T G F H F Q P E K N Y M N D P N A P M Y Y R G R Y H F F Y Q Y N P     | 41  |
| TraesCS4A02G48600(++) | N A M L Q W Q R T G Y H F Q P D K Y Y Q N D P N G P V Y Y R G W Y H F F Y Q Y N P     | 41  |
| Tu.1SST               | (+) N A M L Q W Q R T G Y H F Q P D K Y Y Q N D P N G P V Y Y R G W Y H F F Y Q Y N P | 41  |
| TrT.1SST              | (+) N A M L Q W Q R T G Y H F Q P D K Y Y Q N D P N G P V Y Y R G W Y H F F Y Q Y N P | 41  |
| AeT.1SST              | (+) N A M L Q W Q R T G Y H F Q P D K Y Y Q N D P N G P V Y Y R G W Y H F F Y Q Y N P | 41  |
| AeS.1SST              | (+) N A M L Q W Q R T G Y H F Q P D K Y Y Q N D P N G P V Y Y R G W Y H F F Y Q Y N P | 41  |
| TraesCS7A02G00910(++) | N A M L Q W Q R T G F H F Q P D K Y Y Q N D P N G P V Y Y R G W Y H F F Y Q Y N P     | 41  |

Figure S5: Multiple sequence alignment of motifs (A) Glyco hydro 32N, (B) Glyco hydro32C and (C) INV N Identified in fructans metabolic genes in model species and *qWSC-4A.2* and *qWSC-7A.2* in *Triticum aestivum*

(A)

TraesCS4A02G484800

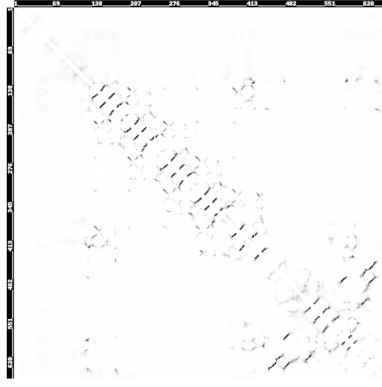

(B)

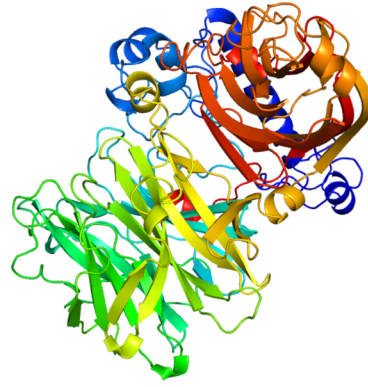

(C)

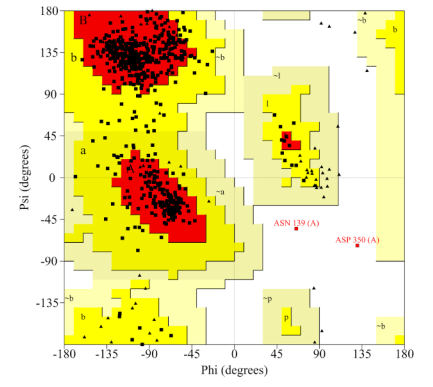

TraesCS4A02G485000

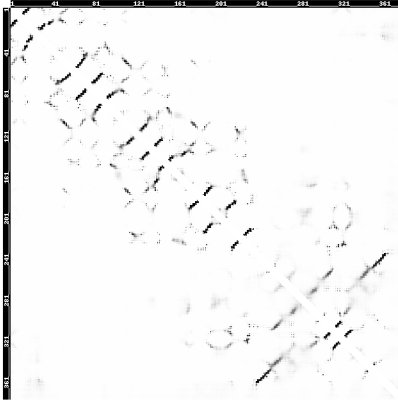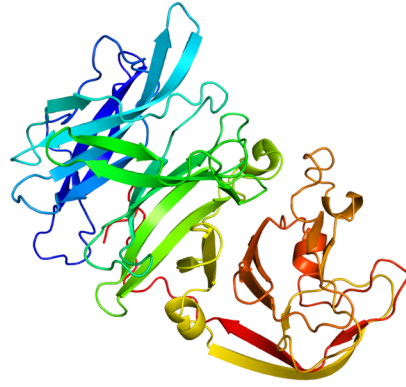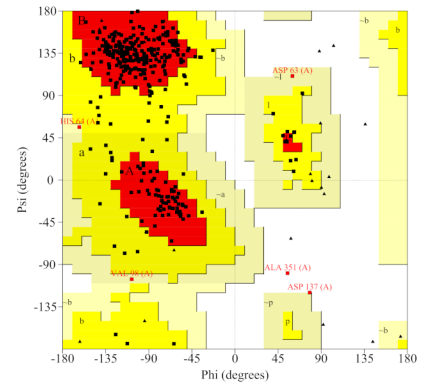

TraesCS4A02G485400

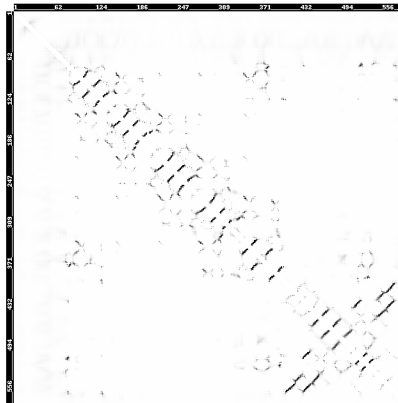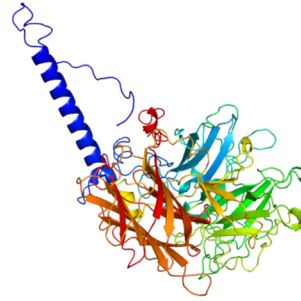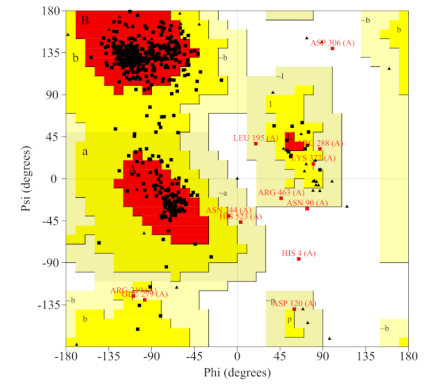

TraesCS4A02G485500

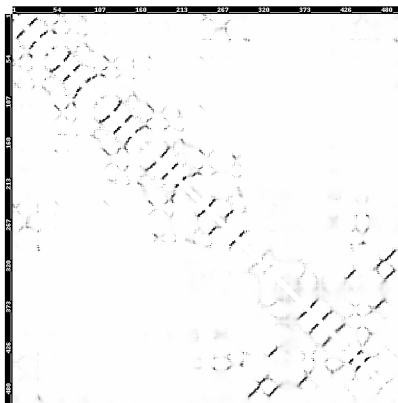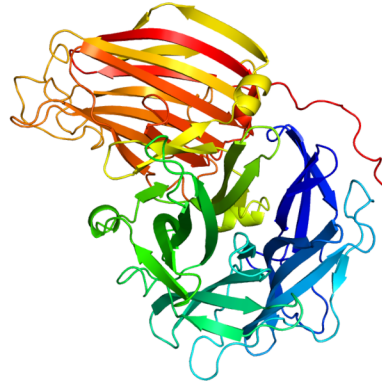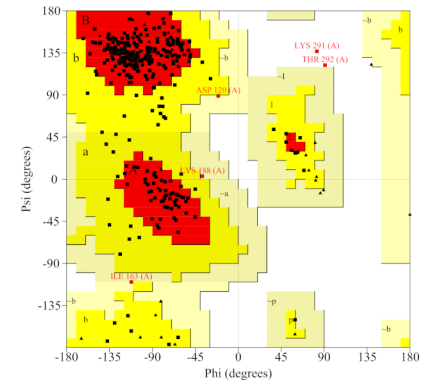



(A)

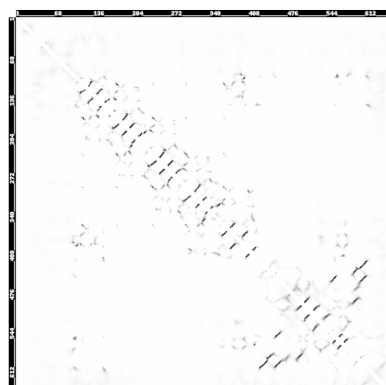

(B)

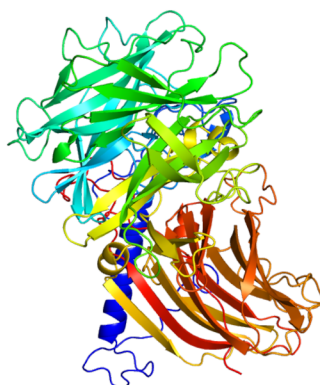

(C)

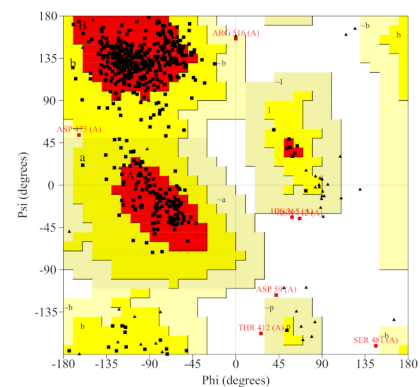

TraesCS4A02G485700

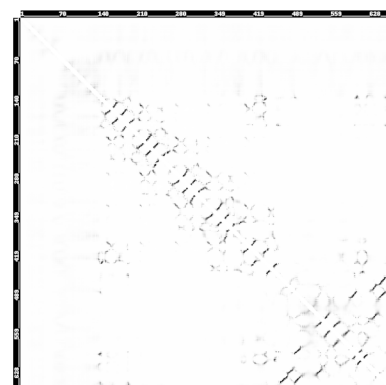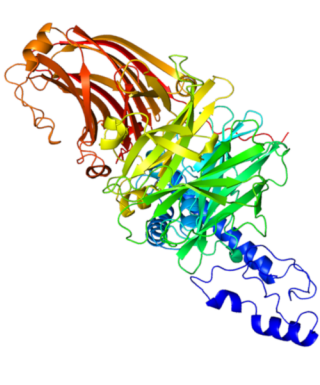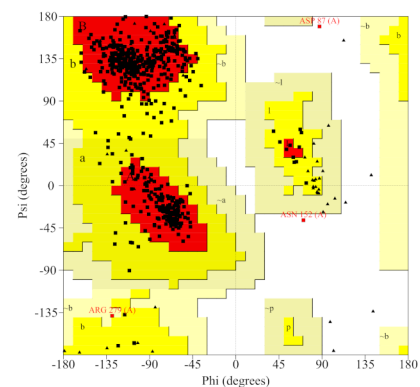

TraesCS4A02G485800

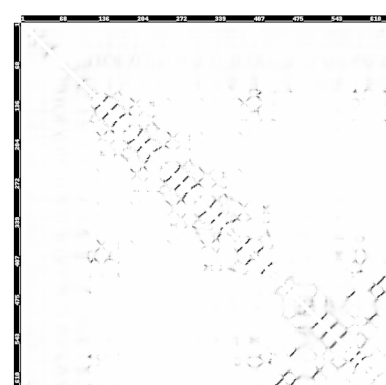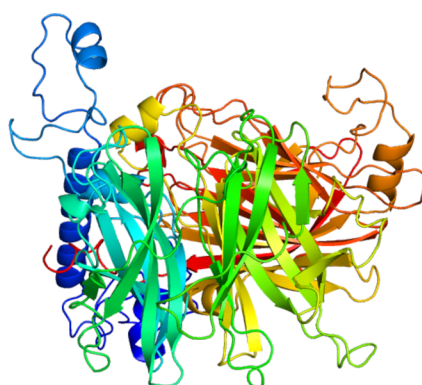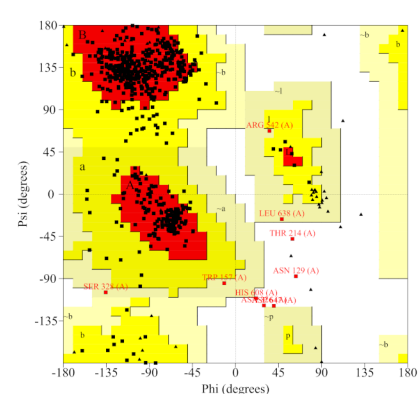

TraesCS4A02G485900

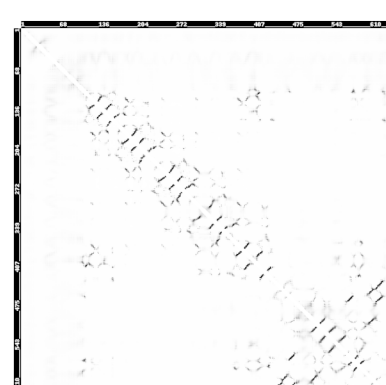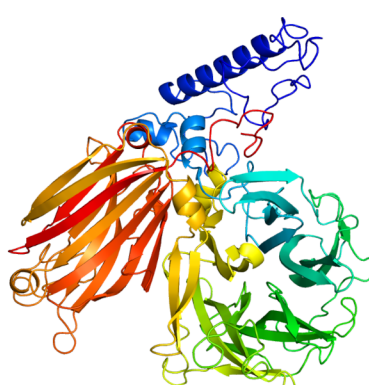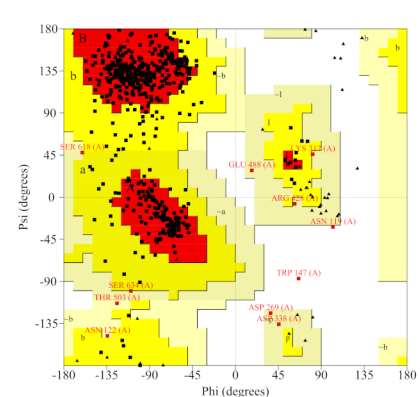

(A)

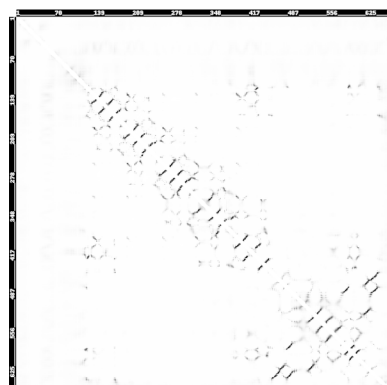

(B)

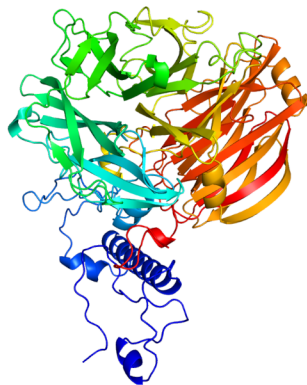

(C)

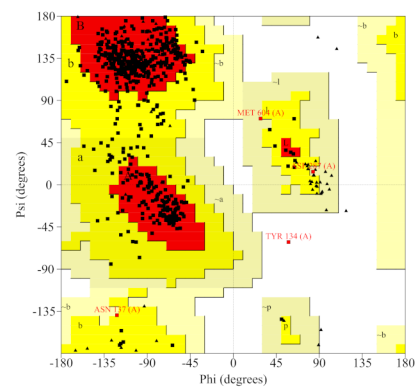

TraesCS7A02G009100

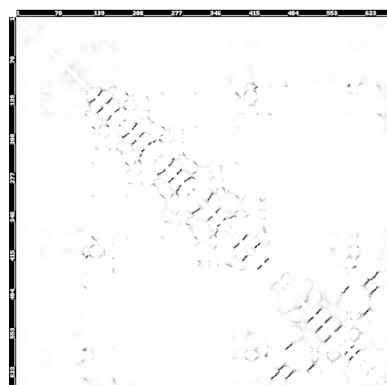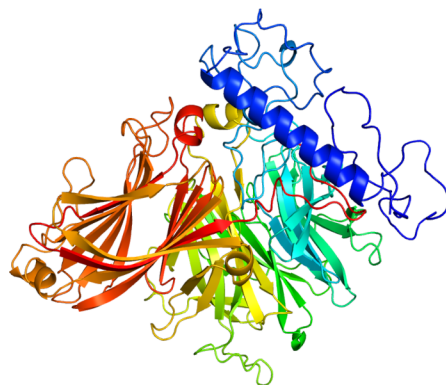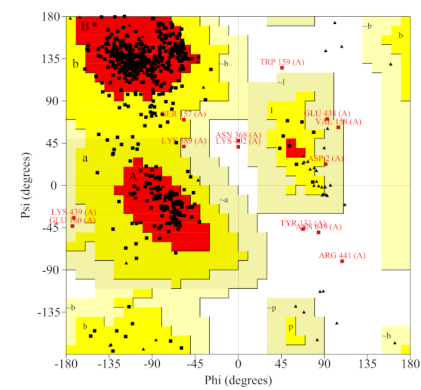

TraesCS7A02G009200

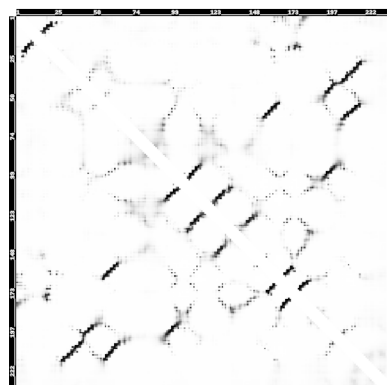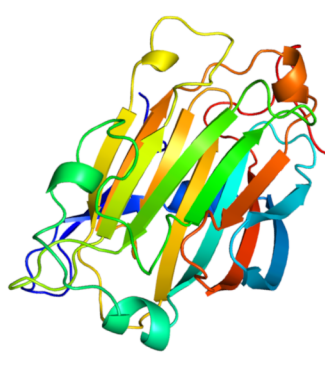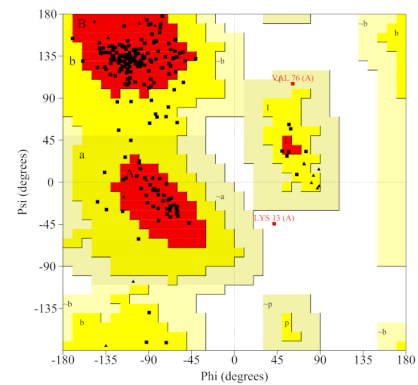

TraesCS7A02G009400

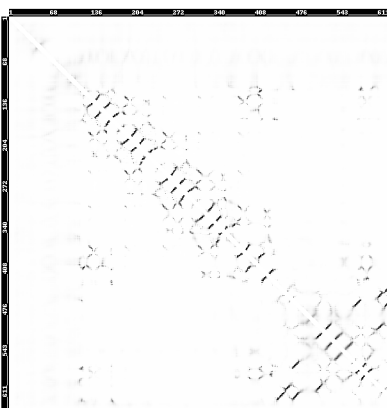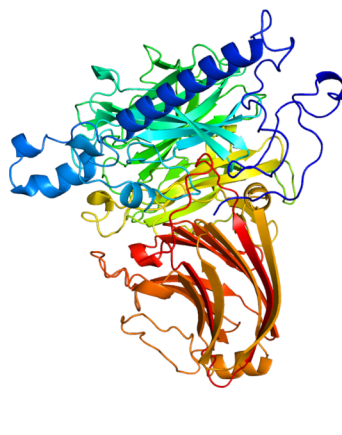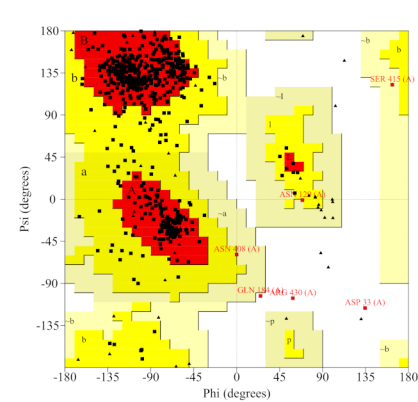

(A)

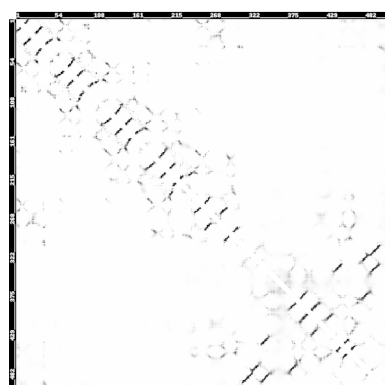

(B)

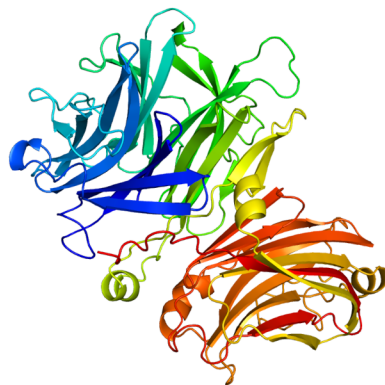

(C)

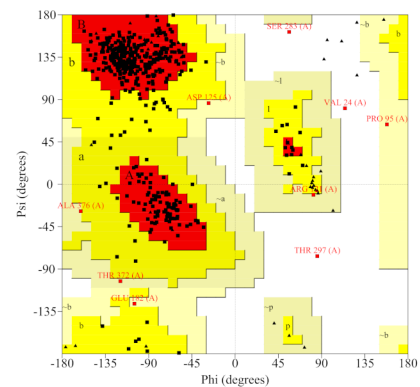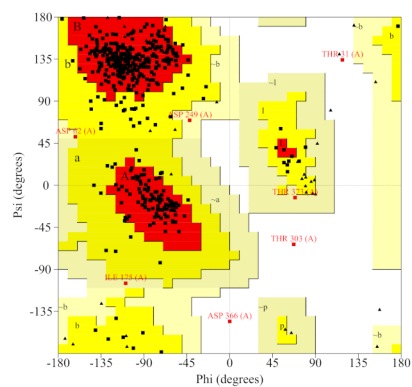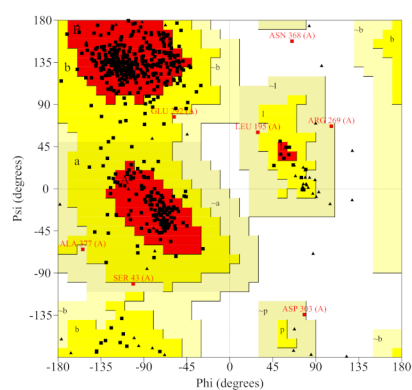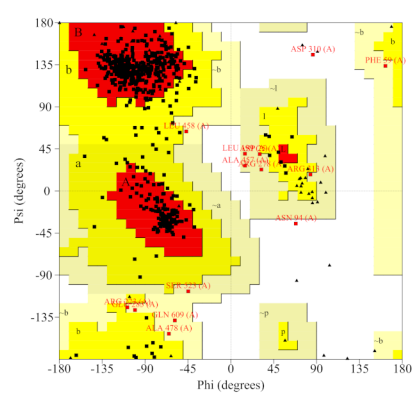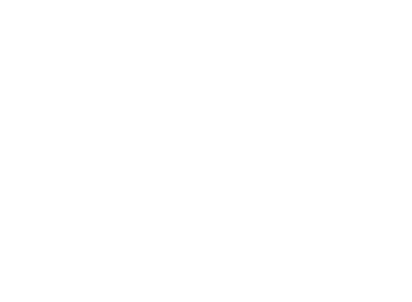

TraesCS7A02G009500

TraesCS7A02G009600

TraesCS7A02G009700

TraesCS7A02G009800



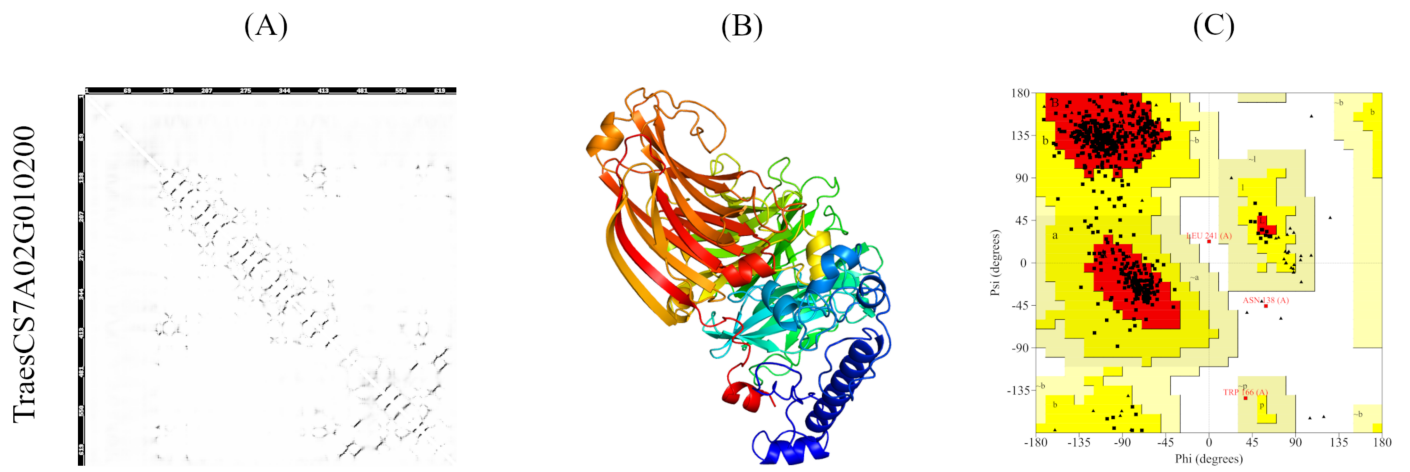

**Figure S6:** Structural differences in the tertiary structure of the proteins translated by different fructans metabolic genes reported in the quantitative nucleotide regions *qWSC-4A.2* and *qWSC-7A.2*. The structures are predicted with contact and distance-based protein folding powered by DeepLearning as implicated in the RaptoraX web server. (A) shows the predicted contact probability matrix. A contact is defined by Cb-Cb distance  $\leq 8\text{\AA}$ . Darker color indicates a higher probability. (B) offers the 3D protein models generated in ChimeraX with resulting pdb files. (C) shows the Ramachandran plots showing amino acid placement in allowed and disallowed regions
