# Supplementary material for: GWAS to Identify Novel QTNs for WSCs Accumulation in Wheat Peduncle Under Different Water Regimes
Source: Front Plant Sci. 2022 Mar 3;13:825687. doi: 10.3389/fpls.2022.825687 (PMC8928439; doi:10.3389/fpls.2022.825687)
Supplement: Supplementary file 3 [file Table_1.XLSX]

## Sheet: Table S1
Table S1: Pedigree and population membership information of 301 bread wheat genotype used in present study
Genotypes	SP	Pedigree	Germplasm	Zone	Sowing Conditions	Specific Trait
Agra-Local	D	Local landrace	Indigenous Collection	---	---	Susceptible To Rust
AKAW-3717	D	HW-2035/NI-5439	Genetic Stock
AKAW-4627	C	WH 147/SUNSTAR*/C 80.1	Variety	Maharashtra	---	Drought Tolerance
AKW-1071	A	VEE'S'/ 3FLN/ACC// ANA	Variety	CZ	---	Heat Tolerant Stock
AKW-2862-1	E	VEERI-6//DOVE(SIB)/(SIB)BUCKBUCK	Genetic Stock	---	---	Early And Late Heat Tolerance
Bacanora-88	G	JUP/BJY//URES	Landraces	---	---	---
Bageshwar-Local	D	LOCAL COLL. UPHILLS	Indigenous Collection	---	---	---
Birsa Gehun	G	Local collection	Indigenous Collection
BRW-3723	A	ACHYUT/BL1887	Variety	BIHAR	TS, RF	---
BWL-9022	G	C591/PBW343	Improved Genotype	---	---	---
C-306	D	REGENT-1974/CH-23//2*C-591/3/P-19/C-281	Variety	NWPZ/NEPZ	---	Drought Tolerant
CBW-38	A	CNDO/R 143/ENTE/MEXI_2/3/Ae.SQUARROSA(TAUS)/4/WEAVER/5/2*PASTOR	Variety	---	---	---
Chirya-3	A	CS/AG.CU//GLEN/3/ALD/PVN/4/NINGMAI NO.4/OLESON//ALD/YANGMAI NO.4	Landraces	---	---	---
D-134	D	RS31/WIS245'S'	Variety	CZ	---	---
DBW-107	G	TUKURU/INQALAB91	Variety	---	---	---
DBW-110	A	KIRITATI/4/2*SERI-82*2/3/KAUZ*2/BOBWHITE//KAUZ	Variety	---	---	---
DBW-128	B	SITE/MO//PASTOR/3/TILHI	Improved Genotype	---	---	---
DBW-129	G	PFAU/MILAN/5/CHEN/A.SQUARROSA (TAUS)/BCN/3/VEE#7/BOW/4/PASTOR	Improved Genotype	---	---	---
DBW-155	B	HUW548/Mv231-98	Improved Genotype	---	---	---
DBW-16	F	RAJ 3765/WR 484//HUW 468	Variety	NEPZ	---	---
DBW-17	F	CMH-79-A-95/3*CIANO-79//RAJ-3777	Variety	NWPZ	---	Terminal Heat Tolerance
DBW-31	C	DBW14/PBW343	Genetic Stock	---	---	---
DBW-39	A	ATTILA/HUI	Variety	---	---	---
DBW-46	C	PBW 343/INQ 21	Genetic Stock	---	---	---
DBW-51	A	SITELLA/MILAN	Genetic Stock	---	---	---
DBW-52	G	CAL/NH/H567.71/3/SERI/4/CAL/NH/H567.71/5/2*KAUZ/6/PASTOR	Improved Genotype	---	---	---
DBW-71	G	PRINIA/UP-2425	Variety
DBW-88	G	KAUZ//ALTAR-84/AWNED-ONAS/3/MILAN/KAUZ,MEX/4/HUITES	Variety	---	---	---
DBW-90	B	HUW-468/WH-730	Variety	---	---	---
DBW-98	B	PBW65*2/PASTOR//PBW550	Improved Genotype	---	---	---
Dharwad Dry	A	Local collection	Indigenous Collection
DL-1266-5	C	SFW/VAISHALI	Genetic Stock	---	---	---
DL-788-2	C	K7537/HD2160/ HD2278//L24/K4.14	Variety	CZ	---	---
DPW-621-50	G	KAUZ//ALTAR-84/(AOS)AWNED-ONAS/3/MILAN/KAUZ/4/HUITES	Variety	---	---	---
FKW-1	G	UP2338*4/CHINA84-40022	Genetic Stock	---	---	Resistance To Yellow And Black Rust
FLW-11	A	WH 542*/Hobbit	Genetic Stock	---	---	Multiple Rust Resistance
FLW-29	A	PBW343/CAPPELLE DESPREZ/PBW343/Lr28(CS2D2M3/8)F7	Genetic Stock	---	---	Resistance To Brown,Yellow And Black Rust
FLW-3	A	UP 2338/ China 84-40022	Genetic Stock	---	---	Resistance To Yellow And Black Rust
FLW-5	A	UP 2338/ ARKAN	Genetic Stock	---	---	Resistance To Brown And Black Rust
GL-11	D	LOCAL COLL.GUJARAT	Indigenous Collection	---	---	---
GL-27	D	LOCAL COLL.GUJARAT	Indigenous Collection	---	---	---
GL-6	D	LOCAL COLL.GUJARAT	Indigenous Collection	---	---	---
GW-173	C	TW-275-7-6-10/LOK-1	Variety	CZ	---	---
GW-2002-18	C	DL51-91/GW265	Genetic Stock	---	---	---
GW-273	G	CPAN-2084/VW-205	Variety	CZ	---	---
GW-322	A	PBW-173/GW-196	Variety
GW-366	C	DL802-3/GW232	Variety	CZ	---	---
GW-391	C	C-306/TR.SH//HW-2004	Improved Genotype	---	---	---
GW-451	C	GW324/4/CROC_1/AE.SQUARROSA(205)//JUP/JY/3/SKAUZ/4/KAUZ/5/GW339	Variety	---	---	---
GW-455	C	J429/DL790-1//PBW510	Improved Genotype	---	---	---
GW-496	A	HD2285/4/CNO/NO//CC/INIA 66/3/KAL/BB	Variety	GUJARAT	---	---
Halna	A	Heat Tolerant Stock	Genetic Stock	---	---	Heat Tolerant stock
HD-1981	A	E 5557 /HD 845	Variety	NWPZ	---	---
HD-2009	C	LERMA-ROJO-64-A/NAINARI-60	Variety	NWPZ	---	---
HD-2189	D	HD1963/HD1931	Variety	PZ	---	---
HD-2270	C	HD 1962/E4870/ K65/HD 2119 /247	Variety	NWPZ	---	---
HD-2285	C	HD1912/H D1592/3/HD196211E4870/K65/4/HD2160/5/H D2186	Variety	NWPZ	---	Karnal Bunt Tolerant
HD-2329	C	HD 1962/E 4870/3/K 65/5/HD1553/4/UP262	Variety	NWPZ	---	---
HD-2385	C	HI 687/HD 2268	Improved Genotype	---	---	---
HD-2402	C	HD2177//CNO67/BB/3/HD2160/4/HD2236	Variety	NEPZ	---	---
HD-2687	D	CPAN-2009/HD-2329	Variety	NWPZ	---	---
HD-2733	E	ATTILA /3/ TUI /CARC // CHEN / CHTO /4/ ATTILA	Variety	NEPZ	TS, IR	---
HD-2781	B	BOBWHITE/C-306/C-591/HW-2004	Variety	PZ	---	---
HD-2824	F	PTO-1 / CNO 79 / PRL /GAA /3/HD 1951	Variety	NEPZ	TS, IR	---
HD-2888	D	C 306/T.sphaerococcum//HW 2004	Variety	NEPZ	---	---
HD-2932	C	KAUZ/STAR//HD 2643	Variety	CZ&PZ	---	---
HD-2985	C	PBW 343/PASTOR	Variety	---	---	---
HD-2987	A	HI-1011/HD-2348//MENDOS//IWP-72/DL-153-2	Variety
HD-2997	F	BOBWHITE//HD-2285//HD-2444	Improved Genotype	---	---	---
HD-30	C	HD-2160/HD-1977//HD-7949/HD-1944/HD-2136	Genetic Stock	---	---	Karnal Bunt Resistant
HD-3016	B	PBW-65/2*PASTOR	Improved Genotype	---	---	---
HD-3043	G	PAJONAL/BOBWHITE//OPATA-85*2/3/CROC-1/TR.TA(224)//OPATA-85	Variety	---	---	---
HD-3045	D	-	Variety
HD-3055	B	OASIS/SKAUZ//4*BCM/2*PASTOR	Improved Genotype	---	---	---
HD-3059	G	KAUZ//ALTAR-84/(AOS)AWNED-ONAS/3/MILAN/KAUZ/4/HUITE	Variety	---	---	---
HD-3071	D	BOW/2*C306//HW2004/PBW175	Improved Genotype	---	---	---
HD-3086	B	DBW-14/HD-2733//HUW-468	Variety	---	---	---
HD-3118	G	ATTILA*2/PBW-65//WEEBILL-1*2/TUKURU	Variety	---	---	---
HD-3127	C	PBW343/CHOIX/Star/3/HEI/3*CNO79//2*SERI	Improved Genotype	---	---	---
HD-3128	F	VL849/HW5015	Improved Genotype	---	---	---
HD-3132	G	WH542/UP2425	Improved Genotype	---	---	---
HD-3139	G	WBLL1//UP2338*2/VIVITSI	Improved Genotype	---	---	---
HD-3146	G	HUW510/CBW17	Improved Genotype	---	---	---
HD-4730	A	ALTAR84/STINT//SILVER45	Improved Genotype	---	---	---
HI-1500	D	HW 2002*2//STREMPALLI/PNC 5	Variety	CZ	---	---
HI-1531	D	HI 1182/CPAN 1990	Variety	CZ	---	---
HI-1544	C	HINDI 62/BOBWHITE/CPAN 2099	Variety	CZ	---	---
HI-1563	C	MACS 2496*2/MC 10	Variety	---	---	---
HI-1579	G	KAUZ//ALTAR84/AOS/3/MILAN/KAUZ/4/HUITES	Improved Genotype	---	---	---
HI-1580	A	-	Variety
HI-1581	D	-	Variety
Hindi-62	D	PBW-226/HW-1042//HD-2285	Genetic Stock	---	---	Heat And Drought Tolerant
HPW-147	A	CPAN-1869/HIM-10-BA	Variety	Himachal	---	---
HPW-251	G	WW-24/LEMHI/P-2-II-149	Variety	NHZ	---	---
HPW-266	E	CH-01-X/STAR/3/HE-1/3*CIANO-79/2*SERI-82	Improved Genotype	---	---	---
HPW-347	G	KAUZ//ALTAR84/AOS/3/MILAN/KAUZ/4/HUITES	Improved Genotype	---	---	---
HPW-348	G	EFED/FINSI	Improved Genotype	---	---	---
HPW-349	G	OASIS/SKAUZ//4*BACANORA-88/3/PASTOR/4/KAUZ*2/YACO//KAUZ	Variety	---	---	---
HPW-371	E	KIRTATI//HUW234+lr34/PRINA	Improved Genotype	---	---	---
HPW-400	B	PRL/*2PASTOR	Improved Genotype	---	---	---
HS-295	E	CINQUENTENARIO/AZTECA-67//IAS-55/ALONDRA/3/ALONDRA/NAOFEN/4/PAJONAL/PEL-1276.69	Variety	NHZ	LS, RF/LIR	---
HS-365	A	HS 207 /SONALIKA	Variety	NHZ	---	---
HS-490	A	HS-364/HPW-114//HS-240/HS-346	Variety	NHZ	---	---
HS-542	G	MILAN/KAUZ,MEX//PRINIA/3/BABAX	Variety	---	---	---
HS-547	B	CHIRYA3/HS396	Improved Genotype	---	---	---
HS-562	A	OASIS/SUPER-KAUZ//4*BACANORA-88/3/2*PASTOR	Variety	---	---	---
HS-577	G	HW2045/HS435	Improved Genotype	---	---	---
HS-590	G	HS469/DL460	Improved Genotype	---	---	---
HS-592	G	CMH82A.1294/2*KAUZ//MUNIA/CHTO/3/MILAN	Improved Genotype	---	---	---
HS-593	G	BAVIS	Improved Genotype	---	---	---
HS-594	A	HS469/EC463658	Improved Genotype	---	---	---
HS-595	B	FRET*2/ELVIRA	Improved Genotype	---	---	---
HTW-11	D	Heat Tolerant Stock	Genetic Stock	---	---	Heat Tolerant Stock
HTW-6	D	Heat Tolerant Stock	Genetic Stock	---	---	Heat Tolerantstock
HUW-12	C	NP 876 / CIANO 66	Variety	NEPZ	---	---
HUW-206	G	KAVKAZ/(SIB)BUHO//KALYANSONA/BLUEBIRD	Variety	NEPZ	---	---
HUW-234	C	HUW 12* 2 / CPAN 1666// HUW 12	Variety	NEPZ	LS, IR	---
HUW-468	A	CPAN-1962 / TONI // LIRA's’ / PRL's'	Variety	NEPZ	TS, IR	---
HUW-598	E	WH581/HUW395//RAJ3765	Improved Genotype	---	---	---
HUW-616	G	RAJ-3814/WH-283//HD-2402	Improved Genotype	---	---	---
HUW-661	G	W15.92/4/PASTOR/HXL7573/2*BAU/3/WBLL1	Improved Genotype	---	---	---
HUW-675	G	ALTAR84/KAUZ//MILAN/HUW510	Improved Genotype	---	---	---
HUW-677	A	HUW510/NW1012//HD2189	Improved Genotype	---	---	---
HUW-679	D	HUW510/HUW533//PBW476	Improved Genotype	---	---	---
HW-2004	G	C 306 *7 //TR 380-14 #7 /3 AG14	Variety	---	---	---
HW-5205	C	CIANO-67/MARIS-FUNDIN//MONCHO(SIB)/3/SERI-82	Improved Genotype	---	---	---
HW-5216	C	PBW343//HW3083	Variety	---	---	---
IC212140	C	COLLECTED FROM BARMER	Indigenous Collection	---	---	---
IC212145	D	COLLECTED FROM JALOR	Indigenous Collection	---	---	---
IC212151	D	COLLECTED FROM BANASKANTHA	Indigenous Collection	---	---	---
IC212161	A	COLLECTED FROM JAMNAGAR	Indigenous Collection	---	---	---
IC212182	D	COLLECTED FROM SIROHI	Indigenous Collection	---	---	---
IC212190	D	COLLECTED FROM JODHPUR	Indigenous Collection	---	---	---
IC296432	C	WL 711* 4/ Aegilops geniculata Acc. 3547	Genetic Stock	---	---	---
IC321856	D	SK 11,PISSILOCAL FROM GUNA,MP	Indigenous Collection	---	---	---
IC321866	C	SK 21,BROWN SPIKE LOCAL WHEAT,RAISEN,MPP	Indigenous Collection	---	---	---
IC321879	A	SK 34,LONG SPIKED LOCAL FROM KASHIPUR,MP	Indigenous Collection	---	---	---
IC321886	C	SK 41, LOCAL COLL. FROM BHOPAL,MP	Indigenous Collection	---	---	---
IC321888	A	SK 43,DROUGHT TOLERANT LOCAL FROM GUNA,MP	Indigenous Collection	---	---	Drought Tolerant Local
IC321898	D	SK 53,BLACK AWNED PISSI FROM SHIVPURI,MP	Indigenous Collection	---	---	---
IC321899	D	SK 54,RAIFED LOCAL WHEAT FROM BHATARWAR,MP	Indigenous Collection	---	---	---
IC321905A	D	SK 60,OLD CULTIVAR FROM GUNA,MP	Indigenous Collection	---	---	---
IC321913	D	SK 68,TALL BLACK AWNED DURUM FROM SIRSA VILL.MP	Indigenous Collection	---	---	---
IC321931	C	SK 86,LAL PISSI FROM ,GUNA,MP	Indigenous Collection	---	---	---
IC321946	F	SK 101,DWARF WHEAT FROM MORAGAON,ASSAM	Landraces	---	---	---
IC321950	F	SK 105,IMPROVED VAR. FROM DOLOIGAON,ASSAM	Landraces	---	---	---
IC321951	A	SK 106,OLD DURUM VAR. FROM SHILLOGNI,ASSAM	Indigenous Collection	---	---	---
IC321958	D	SK 113,DESI WHEAT FROM RAIBENGIA VILL.,ASSAM	Indigenous Collection	---	---	---
IC321988	D	SK 143,CHURI GEHUN FROM JOSHIMATH,UTTARANCHAL	Indigenous Collection	---	---	---
IC322011A	D	SK 166, DESI WHEAT FROM JOSHIMATH	Indigenous Collection	---	---	---
IC322016	A	SK 171, LOCAL WHEAT FROM JOSHIMATH	Indigenous Collection	---	---	---
K-0617	C	HD 2733/K 9423/K 9351	Improved Genotype	---	---	---
K-1114	G	HP1731/HUW234	Improved Genotype	---	---	---
K-1204	G	K8464/PBW343	Improved Genotype	---	---	---
K-307	E	K 8321/UP 2003	Variety	NEPZ	---	---
K-68	D	NP-773/K-13	Variety	Uttar Pradesh	---	---
K-8020	C	KALYANSONA/HD 1982	Variety	NEPZ	---	---
K-8027	D	NP875/4/N10B/Y53//Y50/3/KT54B/5/2*K852	Variety	NEPZ	TS, RF	---
K-8962	C	K 7401 /HD 2160	Variety	NEPZ	---	---
K-9107	G	K-8101/K-68	Variety	NEPZ	---	Karnal Bunt Tolerant
K-9351	G	K72/K8027//K72	Variety	Uttar Pradesh	---	---
KB-2012-03	F	PBW343*6/KBRL22	Improved Genotype	---	---	---
Kharchia-65	D	KHARCHIA LOCAL/ EG 953	Variety	ALL ZONES	---	---
Kharchia Local	D	Salt Tolerant collection	Indigenous Collection	---	---	Salt Tolerant Collection
KRL-19	E	PBW255/KRL 1-4	Variety	ALL ZONES	---	Salt Tolerant Collection
KRL-35	C	HD-2160/KRL-1-4 (KHARCHIA-LOCAL/WL-711)	Genetic Stock	---	---	Salt Tolerant And Water Lodging Tolerant
L-2(Ad)	D	LOCALCOLL.LAHAUL/SPITI	Indigenous Collection	---	---	---
L-25(Amb)	D	LOCALCOLL.LAHAUL/SPITI	Indigenous Collection	---	---	---
L-5(AL)	D	LOCALCOLL.LAHAUL/SPITI	Indigenous Collection	---	---	---
Lal Bahadur	C	S-54723/RS-31-1	Variety	NWPZ	---	---
LBRL-4	A	BREEDSEL-172/PC-OE-BW-22	Genetic Stock	---	---	Leaf Blight Resistant
LGM-110	D	LOCAL COLL.GUJARAT	Indigenous Collection	---	---	---
LGM-130	D	LOCAL COLL.GUJARAT	Indigenous Collection	---	---	---
LGM-133	A	LOCAL COLL.GUJARAT	Landraces	---	---	---
LGM-134-B	D	LOCAL COLL.GUJARAT	Indigenous Collection	---	---	---
LGM-135	D	LOCAL COLL.GUJARAT	Indigenous Collection	---	---	---
LGM-162	D	LOCAL COLL.GUJARAT	Indigenous Collection	---	---	---
LGM-191	D	LOCAL COLL.GUJARAT	Indigenous Collection	---	---	---
LGM-205	D	LOCAL COLL.GUJARAT	Indigenous Collection	---	---	---
LGM-225-1	D	LOCAL COLL.GUJARAT	Indigenous Collection	---	---	---
LGM-225-R	D	LOCAL COLL.GUJARAT	Indigenous Collection	---	---	---
LGM-238	D	LOCAL COLL.GUJARAT	Indigenous Collection	---	---	---
LGM-245	D	LOCAL COLL.GUJARAT	Indigenous Collection	---	---	---
LOK-1	A	S308 / S331	Variety	CZ	TS/LS, IR	---
LOK-41	A	S308/S331	Improved Genotype	---	---	---
LOK-44	A	---	Improved Genotype	---	---	---
LOK-54	A	LOK1/J.24/SONALIKA"S"//HW2006/RW2358/HW2002	Improved Genotype	---	---	---
MACS-6145	D	C306+LR28	Variety	NEPZ	---	---
MACS-6222	C	HD 2189*2//MACS 2496	Variety	PZ	---	---
MACS-6273	C	KAUZ*2/CHEN//BCN/MILAN	Improved Genotype	---	---	---
MACS-6354	A	-	Improved Genotype
MACS-6507	E	WG2780/JB1002	Improved Genotype	---	---	---
ML-1194	A	BB-ND/NO 66-P1+C81	Genetic Stock	---	---	Resistant To Loose Smut ,Karnal Bunt, Stripe And Leaf Rust
MP-1201	B	CMH-82-A-1294/2*KAUZ//MUNIA/CHORLITO/3/MILAN	Variety	---	---	---
MP-1202	A	CMH-82-A-1294/2*KAUZ//MUNIA/CHORLITO/3/MILAN	Variety	---	---	---
MP-1279	D	GW322/HW2451	Improved Genotype	---	---	---
MP-3211	A	SUPER-KAUZ/FLYCATCHER	Variety	---	---	---
MP-3288	F	DOVE/BUC/DL 788-2	Variety	CZ	TS, RF	---
MP-4010	C	ANGOSTURA 88	Variety	CZ	---	---
MP-4106	A	CHIBIA//PRL11/CM65531	Variety	Madhya Pradesh	LS, IR	---
Narmda-4	D	GB-AVS/N14/3/PW5//TH/NP165	Variety	Madhya Pradesh	---	---
NB-29-13-5-9	D	LOCAL COLL.GUJARAT	Indigenous Collection	---	---	---
NB-29-6-2-12	D	LOCAL COLL.GUJARAT	Indigenous Collection	---	---	---
NI-5439	D	RFPM-80/3*NP-710	Variety	PZ	---	---
NIAW-34	E	CNO 79/PRL “S”	Variety	MAH	---	---
NIAW-917	E	GW 244/BOB WHITE	Variety	PZ	TS, IR	---
NP-846	A	RIO-NEGRO/NP-760	Variety
NP-852	F	KENYA-FARMER/2*NP-761	Variety	NEPZ	---	---
NW-2036	G	BOBWHITE/CROW/BUCKBUCK/PAVON-76	Variety	NEPZ	---	---
NW-4035	C	WEAWER/WL-2926//SW-89-3064	Improved Genotype	---	---	---
PBW-138	D	WG-387/HD-2177	Variety	PUNJAB	---	---
PBW-175	F	HD 2160 /WG 1025	Variety	NWPZ	---	---
PBW-343	F	NORD-DESPREZ/VG-1944//KALYANSONA//BLUEBIRD/3/YACO(SIB)/4/VEERY-5	Variety	NWPZ	---	Tolerant To Lodging
PBW-373	A	ND/VG9144 //KAL/BB/3/YCO”S’/4/VEE#5 'S’	Variety	NWPZ	LS, IR	---
PBW-396	G	CIANO-67/(MFD)MARIS-FUNDIN//MONCHO(SIB)/3/SERI-82	Variety	NWPZ	---	---
PBW-502	F	W-485/PBW-343//RAJ-148	Variety	NWPZ	---	Resistant To Karnal Bunt
PBW-550	G	WH-594/RAJ-3858//W-485	Variety	NWPZ	---	---
PBW-579	C	W7554/PBW427	Improved Genotype	---	---	---
PBW-590	G	WH 594/RAJ3814//W 485	Variety	NWPZ	LS, IR	---
PBW-596	G	PBW-343/DHARWAD-DRY//PBW-343	Variety	PZ	---	---
PBW-610	G	W 13334/IBWSN 92//PBW 496	Improved Genotype	---	---	---
PBW-621	G	KAUZ//ALTAR84/AOS/3/MILAN/KAUZ/4/HUITES	Variety	---	---	---
PBW-644	G	PBW-175/HD-2643	Variety	---	---	---
PBW-65	C	USA 255/K 816 /3/ WL 202	Variety	NWPZ	---	---
PBW-658	G	CHINESE-SPRING/TH.SC//3*PAVON-76/3/MIRLO/BUCKBUCK/4/MILAN/5/TILHI	Variety	---	---	---
PBW-660	G	WG 6761 / WG 6798	Variety	---	---	---
PBW-674	G	-	Variety
PBW-681	G	UP2338/KALYANSONA	Improved Genotype	---	---	---
PBW-689	G	PBW442/WH576//DWR232	Improved Genotype	---	---	---
PBW-692	G	INQUALAB91*3/TUKURU//DBW18	Improved Genotype	---	---	---
PBW-697	F	DBW18/3WL711-AE. OVATA/CS(S)//WL711NN/4/DBW18	Improved Genotype	---	---	---
PBW-698	F	BW9250*3/YR10/6*AVOCET/3/BW9250*3//YR15/6*AVOCET	Improved Genotype	---	---	---
PBW-702	F	PBW533//YR15/6*AVOCET/3/PBW533	Improved Genotype	---	---	---
PBW-703	F	BW9250*3/YR10/6*AVOCET/3/BW9250*3//YR15/6*AVOCET	Genetic Stock	---	---	---
PBW-704	G	HP1887/PBW565	Improved Genotype	---	---	---
PBW-706	G	MINO/898.97	Improved Genotype	---	---	---
PBW-722	F	PBW343+Lr57/Yr40+Lr37+Yr17	Improved Genotype	---	---	---
PBW-723	F	PBW343+Lr57/Yr40+Yr15	Variety	---	---	---
Pusa-2019-A	G	CS CMS*7/HW2019	Genetic Stock	---	---	---
PWR-4099	A	CBHW-CHN-89-R-4294O-CHN-S-2BV-97-(EC-4141480)	Genetic Stock	---	---	---
RAJ-3765	C	HD 2402/VL639	Variety	NW/NEPZ	---	---
RAJ-4037	C	DL 788-2/RAJ 3717	Variety	CZ	---	---
RAJ-4083	G	PBW-343/UP-2442//WR-258/UP-2425	Variety	PZ	---	---
RAJ-4124	C	BUCK-PANGARE(SIB)//CIANO-67(SIB)/GALLO/HD-30//VL-804	Improved Genotype	---	---	---
RAJ-4356	C	---	Improved Genotype	NEPZ	---	---
RSP-561	C	HD2637/Ae. crassa// HD2687	Variety	---	---	---
Safed Lerma	A	Y50//N10B/3/LR 52/3*LR	Variety	NPZ	---	---
SKW-441	F	RAYON/PASTOR	Improved Genotype	---	---	---
Sonlika	A	II-53-388/ANDES//(SIB)PITIC-62/3/LERMA-ROJO-64	Variety	NW/NEPZ	---	Salt Tolerant
Sonara-64	A	YAKTANA-54//NORIN-10/BREVOR/3/2*YAQUI-54	Variety	NEPZ/CZ	---	---
T-808	G	Local Landrace	Indigenous Collection	---	---	---
UAS-304	A	SERI/CEP80120//KAUZ/PBW343	Variety	---	---	---
UAS-305	B	CMH-84-3379/CMH-78-578//MILAN/HD-2189	Improved Genotype	---	---	---
UAS-316	E	PASTOR/DHARWAD DRY/DWR39	Improved Genotype	---	---	---
UAS-320	G	UAS-257//GW-322/DWR-195	Genetic Stock	---	---	---
UP-115	D	NP-887/E-4870//UP-302	Variety	NEPZ	---	---
UP-2338	A	UP 368 /VL 421//UP 262	Variety	NWPZ	TS/LS, IR	---
UP-2425	C	HD 2320/UP 2263	Variety	NWPZ	---	---
UP-262	A	SONALIKA(S-308)/BAJIO-66	Variety	NEPZ	---	---
UP-2691	E	UP2377/HW1085	Improved Genotype	---	---	---
UP-2855	G	PBW565/UP2565	Improved Genotype	---	---	---
UP-2864	E	PBW573/UP2425	Improved Genotype	---	---	---
UP-2890	A	INQUALAB*2/TUKURU//UP2382	Improved Genotype	---	---	---
UP-2891	C	HUW562/(CROC_1/A.SQU(205)//BORL95/3/2*MILAN	Improved Genotype	---	---	---
VL-1004	G	RAJ3765/BLUEBOYII/RAJ3765	Improved Genotype	---	---	---
VL-3004	G	HD2844/PBW486	Improved Genotype	---	---	---
VL-639	A	VL421/CPAN1535	Genetic Stock	---	---	Loose Smut Resistant
VL-738	G	NS12.07 /LIRA”S” //VEE ‘S”	Variety	NHZ	---	---
VL-798	C	CPAN-3004/CPAN-1922/PBW-65	Genetic Stock	---	---	Hill Bunt Resistant
VL-802	G	CPAN3018/CPAN3004//PBW65	Variety	---	---	---
VL-804	A	CPAN 3018 /CPAN 3004 //PBW 65	Variety	NHZ	---	---
VL-892	C	WH 542/PBW 226	Variety	NHZ	---	---
VL-900	C	KAUZ/3/MYNA/BUL/FLK/4/MILAN	Improved Genotype	---	---	---
VL-907	F	DYBR-1982-83/842-ABVD-50/VW-9365//PBW-343	Variety	NEPZ	---	---
VL-946	C	HW 2045/ VW 0185	Improved Genotype	---	---	---
VL-967	G	SHARP/3/PRL/SARA/TSI/VEE#5/5/VEE/LIRA//BOW/3/BCN/4/KAUZ#4	Improved Genotype	---	---	---
WBM-1587	A	MILAN/SHA7	Genetic Stock	---	---	Yellow Rust Resistant
WBM-1591	D	PYN/BAU//MILAN	Genetic Stock	---	---	Yellow Rust Resistant
WH-1046	C	VEERY/PAJONAL//2*HUITLE/3/WH-756	Improved Genotype	---	---	---
WH-1061	G	WEAWER/WL 2926//SW 89.3064	Improved Genotype	---	---	---
WH-1080	B	21STSAWSN151	Variety	NWPZ	TS, RF	---
WH-1097	B	ATILLIA/BABAX//PASTOR	Improved Genotype	---	---	---
WH-1100	B	PBW 65/ 2*PASTOR	Improved Genotype	---	---	---
WH-1105	G	MILAN/S-87230//BABAX	Variety	---	---	---
WH-1124	A	MUNIA/CHORLITO//AMSEL	Variety	---	---	---
WH-1126	A	WBLL 1*2/VIVITSII	Improved Genotype	---	---	---
WH-1129	A	CS/TH.CS//3*PVN/3/MIRLO/BUC/4/MILAN/5/TILHI	Improved Genotype	---	---	---
WH-1132	B	PBW65*2/PASTOR	Improved Genotype	---	---	---
WH-1138	B	PBW65*2/PASTOR	Improved Genotype	---	---	---
WH-1142	B	CHEN/TR.TA//FLYCATCHER/3/2*WEAVER	Variety	---	---	---
WH-1154	E	WH337/HD2255//RAJ3077	Improved Genotype	---	---	---
WH-1156	B	TILHI/PASTOR	Improved Genotype	---	---	---
WH-1157	G	MUNIA/CHTO/AMSEL	Improved Genotype	---	---	---
WH-1164	G	RL6043/4*NAC//2*PASTOR	Improved Genotype	---	---	---
WH-147	A	E 4870/C286/C273 /4/S339/PV18	Variety	CZ	---	Salt Tolerant
WH-423	E	WL 371-M 164 x Raj 842	Improved Genotype	---	---	---
WH-542	G	JUPATECO-73/BLUEJAY//URES-81	Variety	NWPZ	---	---
WH-595	G	PRL 6045/NAC 76	Genetic Stock	---	---	Stripe Rust Resistant
WH-730	G	CPAN 2092/Improved Lok-1	Improved Genotype	---	---	Heat Tolerantstock
WL-3526	A	HD2009/WG 377	Genetic Stock	---	---	Loose Smut ,Karnal Bunt, Stripe Leaf Resistant
WL-711	A	SONALIKA/CHRIS//KALYANSONA	Variety	NWPZ	---	---
SP: Sub-population
CZ: Central Zone
NWPZ: North-western plain zone
NEPZ: North-eastern plain zone
NHZ: Northern hill zone
PZ: Peninsular zone
TS: Timely sown
RF: Rainfed
LS: Late sown

## Sheet: Table S2
Table S2: Indvudual ANOVA and summary statistics of resulting BLUE for water soluble sugars estimated in GWAS pannel
Traits	Environments	Water Regime	Genotype Variance	Residual Variance	Broad-sense Heritability	Minimum	Maximum	Mean	Standard Error	Coefficient of Variation (%)	Skewness	Kurtosis
Glucose	E01	Irrigated	0.398426	0.340534	70.06	10.4026	14.8597	12.0227	0.577846	4.80628	0.454865	0.137475
	E02	Rainfed	0.943186	0.764128	71.1704	11.6928	18.7968	13.9396	0.874144	6.27096	0.993433	2.41042
	E03	Irrrigated	0.682735	0.433256	75.9132	9.03406	14.8341	11.1769	0.66158	5.91917	0.636885	0.619246
	E04	Drought	1.78998	0.822549	81.3163	3.08342	18.4491	13.9938	0.907169	6.48265	-0.827665	9.53155
	E05	Irrigated	0.649732	0.400998	76.4183	8.49706	15.7203	11.937	0.629509	5.27359	0.675266	2.1039
	E06	Rainfed	1.05985	0.724397	74.5297	11.2748	18.3817	13.931	0.848095	6.08782	0.659218	0.793298
	E07	Irrigated	0.856072	0.673438	71.7705	2.68517	14.637	11.102	0.820633	7.39175	-1.34659	11.2099
	E08	Drought	1.66187	1.1085	74.9901	3.00223	18.4148	13.9766	1.05285	7.53294	-0.931188	9.25663
Fructose	E01	Irrigated	0.779312	0.614853	71.7111	6.93579	12.9077	10.1237	0.786271	7.76666	0.135907	-0.0182433
	E02	Rainfed	0.746184	0.612537	70.8996	8.68802	13.8477	11.5244	0.773185	6.70909	-0.184991	-0.4112
	E03	Irrrigated	1.54196	1.01558	75.2267	7.6736	14.799	10.5401	1.00776	9.56122	0.371856	-0.416371
	E04	Drought	2.35474	1.62863	74.3042	8.68318	17.8812	12.2743	1.27618	10.3971	0.487226	-0.248244
	E05	Irrigated	0.96667	0.983916	66.2726	6.55394	14.0625	10.2734	0.991925	9.65532	-0.052263	0.355753
	E06	Rainfed	0.993669	0.938163	67.9316	8.18176	15.2833	12.2266	0.968588	7.92197	-0.1772	0.488815
	E07	Irrigated	3.86568	2.6234	74.6648	5.19174	16.8473	9.81008	1.62677	16.5826	1.13183	1.17149
	E08	Drought	6.7796	5.04239	72.8927	6.11565	20.5739	12.2782	2.25313	18.3507	0.982747	0.449986
Sucrose	E01	Irrigated	0.757781	0.636552	70.422	29.6231	36.1378	31.9209	0.797842	2.49943	0.505662	0.512634
	E02	Rainfed	1.76674	1.45309	70.8599	34.1064	43.5944	37.1932	1.20544	3.24103	1.08982	2.65143
	E03	Irrrigated	1.31626	0.998555	72.4998	27.8224	36.2653	30.8251	0.999277	3.24177	0.699882	0.939804
	E04	Drought	2.99122	2.63312	69.4376	22.6686	44.301	38.0983	1.62269	4.25921	-0.842158	9.97574
	E05	Irrigated	1.03186	1.20291	63.1756	26.9141	37.2445	31.8156	1.09677	3.44728	0.726418	2.50224
	E06	Rainfed	1.82809	1.8201	66.764	33.5891	43.2514	37.1717	1.35646	3.64917	0.703551	0.901561
	E07	Irrigated	1.69419	1.58177	68.1747	18.794	35.9492	30.7008	1.25768	4.09658	-1.21939	10.3594
	E08	Drought	4.14931	1.14368	87.8877	22.6686	44.4773	38.1818	1.07281	2.80974	-0.76723	8.0172
Fructans	E01	Irrigated	250.693	142.155	77.9106	34.8786	125.641	79.4675	11.9004	14.9752	0.160453	-0.0728826
	E02	Rainfed	214.227	134.704	76.0806	48.5302	150.494	92.9327	11.6062	12.4888	0.319769	0.169939
	E03	Irrrigated	761.127	324.76	82.417	26.8696	181.17	100.657	18.0478	17.9299	0.268127	-0.316164
	E04	Drought	1169.49	409.342	85.1058	63.167	267.061	134.567	20.3987	15.1588	0.603493	0.243673
	E05	Irrigated	324.364	236.685	73.2684	23.6217	139.239	77.4719	15.3928	19.8689	0.232599	-0.0449298
	E06	Rainfed	310.286	172.953	78.2044	32.1393	153.533	95.7844	13.0575	13.6322	-0.0979265	0.189548
	E07	Irrigated	1020.92	581.982	77.8194	12.7337	199.128	87.3205	24.1243	27.6273	0.714616	0.267081
	E08	Drought	1316.85	618.807	80.9745	49.6241	266.424	143.787	25.0036	17.3893	0.519711	0.0652855
TNSC	E01	Irrigated	276.142	143.702	79.3527	87.2278	184.846	133.536	11.9561	8.95348	0.207593	-0.0128228
	E02	Rainfed	269.136	139.325	79.4384	108.403	223.831	155.591	11.8036	7.58631	0.47527	0.463409
	E03	Irrrigated	827.883	331.887	83.3026	77.3606	237.655	153.199	18.2356	11.9032	0.296567	-0.264586
	E04	Drought	1343.45	409.266	86.7815	127.998	339.426	198.929	20.4128	10.2614	0.634532	0.251402
	E05	Irrigated	370.632	241.181	75.4509	76.9673	201.863	131.501	15.5394	11.817	0.269305	-0.0153259
	E06	Rainfed	373.3	176.117	80.9132	92.3979	221.518	159.112	13.1834	8.2856	0.00359064	0.186501
	E07	Irrigated	1162.75	589.012	79.7904	56.9974	262.006	138.933	24.2696	17.4686	0.719866	0.303068
	E08	Drought	1557.81	626.539	83.2573	91.9918	335.931	208.224	25.1382	12.0727	0.491856	0.114551
WSC	E01	Irrigated	342.56	231.305	74.7601	81.6504	187.984	138.916	15.2087	10.9481	-0.169995	-0.191934
	E02	Rainfed	592.357	264.625	81.7417	85.073	216.453	150.669	16.2673	10.7967	0.0916113	-0.421864
	E03	Irrrigated	288.103	164.981	77.741	94.9346	191.992	142.703	12.8027	8.97157	-0.0575923	-0.394223
	E04	Drought	636.712	242.608	83.9972	106.39	244.149	178.847	15.5876	8.71564	-0.153501	-0.623561
	E05	Irrigated	398.926	257.784	75.5802	73.5854	198.29	130.7	16.0557	12.2844	-0.278214	-0.233488
	E06	Rainfed	739.266	400.451	78.6879	65.6885	233.171	146.814	20.0113	13.6304	-0.217246	-0.292549
	E07	Irrigated	476.028	232.299	80.3861	83.5916	202.861	143.392	15.1922	10.5949	-0.165028	-0.45544
	E08	Drought	921.017	434.447	80.9159	87.1744	260.98	172.042	20.8434	12.1153	-0.235377	-0.370949

## Sheet: Table S3
Table S3: Summary statistics of polymorphic SNPs used in present GWAS study
Chromosome	No. of Markers	Marker Position(cM)			Marker Density	Minor allele frequency (MAF)			Genetic Diversity (H)			Polymorphism Infromation Content (PIC)
		Min	Max	Sum		Min	Max	Mean	Min	Max	Mean	Min	Max	Mean
1A	846	41.03	148.06	60580.6	71.61	0.05	0.5	0.26	0.1	0.5	0.35	0.09	0.25	0.21
1B	1213	0	148.84	49451.8	40.77	0.05	0.5	0.26	0.1	0.5	0.36	0.09	0.25	0.22
1D	388	0	238.14	51250.9	132.09	0.05	0.5	0.32	0.1	0.5	0.39	0.09	0.25	0.22
2A	1097	0	179.99	89668.6	81.74	0.05	0.5	0.26	0.1	0.5	0.36	0.09	0.25	0.22
2B	1360	0	187.28	125457	92.25	0.05	0.5	0.27	0.1	0.5	0.36	0.09	0.25	0.22
2D	365	0	295.13	76527.8	209.67	0.05	0.5	0.23	0.1	0.5	0.33	0.09	0.25	0.21
3A	760	0	339.45	71384.4	93.93	0.05	0.5	0.26	0.1	0.5	0.35	0.09	0.25	0.21
3B	1215	0	245.57	111673	91.91	0.05	0.5	0.29	0.1	0.5	0.38	0.09	0.25	0.22
3D	206	0	203.45	19785.5	96.05	0.05	0.5	0.27	0.1	0.5	0.36	0.09	0.25	0.21
4A	579	0	215.51	74461.2	128.6	0.05	0.5	0.25	0.1	0.5	0.35	0.09	0.25	0.21
4B	426	0.37	146.87	35316.9	82.9	0.05	0.5	0.23	0.1	0.5	0.32	0.09	0.25	0.2
4D	61	0	162.13	3279.41	53.76	0.06	0.49	0.28	0.11	0.5	0.36	0.1	0.25	0.21
5A	875	0	116.44	54897.5	62.74	0.05	0.5	0.27	0.1	0.5	0.36	0.09	0.25	0.22
5B	1261	0	325.55	171403	135.93	0.05	0.5	0.31	0.1	0.5	0.39	0.09	0.25	0.23
5D	192	0	219.57	6045.84	31.49	0.05	0.48	0.16	0.1	0.5	0.26	0.09	0.25	0.18
6A	718	0	225.31	72094.6	100.41	0.06	0.5	0.28	0.11	0.5	0.36	0.1	0.25	0.22
6B	1136	0	160.89	72602.1	63.91	0.05	0.5	0.28	0.1	0.5	0.37	0.09	0.25	0.22
6D	130	0	184.72	7770.3	59.77	0.06	0.5	0.26	0.11	0.5	0.36	0.1	0.25	0.22
7A	853	0	201.13	46397.4	54.39	0.05	0.5	0.27	0.1	0.5	0.36	0.09	0.25	0.22
7B	746	0.94	336.69	78052.2	104.63	0.05	0.5	0.28	0.1	0.5	0.37	0.09	0.25	0.22
7D	144	6.96	246.43	10885.6	75.59	0.05	0.5	0.25	0.1	0.5	0.34	0.09	0.25	0.21
A Genome	5728	0	339.45	469484	81.96	0.05	0.5	0.26	0.1	0.5	0.36	0.09	0.25	0.22
B Genome	7357	0	336.69	643957	87.53	0.05	0.5	0.28	0.1	0.5	0.37	0.09	0.25	0.22
D Genome	1486	0	295.13	175545	118.13	0.05	0.5	0.26	0.1	0.5	0.34	0.09	0.25	0.21

## Sheet: Table S4
Table S4: List of significant NTAs reported for studied traits and comparision with previous studies
SNP*	Chromosome	Consesuous Position (cM)	QNRs	Fructose				Glucose				Sucrose				Fructans				TNSC				WSC				Compairsion with previous studies
				Env	log10(p)	SNP Effect	PEV (%)	Env	log10(p)	SNP Effect	PEV (%)	Env	p-value	SNP Effect	PEV (%)	Env	p-value	SNP Effect	PEV (%)	Env	p-value	SNP Effect	PEV (%)	Env	p-value	SNP Effect	PEV (%)
AX-94583145	1A	54.04	qWSC-1A.1	E02	3.08672	0.276401	5.18216																					wsnp_Ra_c26191_35761997, 54 cM Dong et al. (2016); at 53.5 cM for WRRps, Oveden et al. (2017)
AX-95137931	1A	54.04																		E03	3.03763	9.94	3.91
AX-94599217	1A	61.06	qWSC-1A.2	RF	4.00528	0.406681	7.75759																					Xgwm135 at 60.7 cM for WSCG-Ste under KI-WW, Li et al. 2015; Xgwm135 at 60.7 cM for WSC at midgrain filling in Total-Ped under WW, Zhang et al. (2014); WSC10,20 Fu et al. (2020)
AX-94979481	1A	69.85	qWSC-1A.3					E02	3.50864	0.3	6.27	E02	3.54363	0.42	6.36
AX-95068712	1A	74.11	qWSC-1A.4													E08	4.01682	-23.19	6.23	E08	3.92445	-24.51	6.05
AX-94781823	1A	74.11														E08	3.08884	-15.61	4.83	E08	3.14327	-16.91	4.88
AX-94480929	1A	74.11														E08	3.00833	15.09	4.72	E08	3.06098	16.34	4.75
AX-94623356	1A	74.11						E02	3.03621	-0.37	5.56	E02	3.25649	-0.53	5.93
AX-94395004	1A	74.11														E08	3.06956	-21.5	4.81
AX-94841333	1A	74.11		E08	3.49649	1.15929	5.16266
AX-94580118	1A	74.11		RF	3.42594	0.33853	6.89483
AX-94604685	1A	74.11		E02	3.29998	-0.337327	5.49819
AX-94418426	1A	74.11		RF	3.23075	0.311905	6.60786
AX-94408765	1A	74.11		E08	3.05059	-1.0709	4.49554
AX-94959165	1A	74.11										E02	3.07007	-0.52	5.66
AX-94399869	1A	74.11																		E08	3.03527	-16.66	4.72
AX-95182518	1A	74.11																		E08	3.03527	-16.66	4.72
AX-95629860	1A	74.11																		E08	3.00789	-16.73	4.68
AX-94398706	1A	75.74														E05	3.18442	5.15	7.15	E05	3.04048	5.35	6.48
AX-94509092	1A	75.74														E05	3.04769	4.99	6.95
AX-94618537	1A	75.74																						E06	3.23807	-14.01	5.5
AX-95071361	1A	75.74																						E06	3.23807	-14.01	5.5
AX-95246262	1A	75.74																						E06	3.23807	-14.01	5.5
AX-94433739	1A	75.74																						E06	3.15243	13.5	5.37
AX-95657292	1A	75.74																						E06	3.06449	13.49	5.24
AX-94663476	1A	75.74																						E06	3.04096	-13.36	5.2
AX-94964616	1A	78.02	qWSC-1A.5													E05	3.22548	-5.18	7.21	E05	3.15058	-5.44	6.64
AX-94706964	1A	79.73																		IR	3.20971	-4.12	6.08
AX-94726800	1A	81.31	qWSC-1A.6	IR	3.47003	-0.212603	4.76732
AX-94504454	1A	81.31		IR	3.3651	0.210835	4.60893
AX-94583506	1A	81.31		IR	3.3651	0.210835	4.60893
AX-94960090	1A	81.31		IR	3.3651	0.210835	4.60893
AX-94492604	1A	81.31		IR	3.28536	-0.207047	4.48895
AX-95633211	1A	81.31		IR	3.11104	-0.216061	4.22788
AX-95137011	1A	81.31		IR	3.05208	-0.214645	4.13996
AX-94406786	1A	87.93	qWSC-1A.7					E04	3.69897	-0.41	5.53	E04	4.09098	-0.62	5.97
AX-94464571	1A	87.93		IR	3.21371	0.234593	4.38143
AX-94674333	1A	88.71														E03	3.00922	-10.19	3.85
AX-94822081	1A	88.71		E05	3.46359	0.288451	4.44743
AX-95204965	1A	88.71		E05	3.11327	-0.284158	3.91933
AX-94690045	1A	88.71		E05	3.08624	-0.282635	3.87888
AX-94400901	1B	8.24	qWSC-1B.1													E05	3.94692	-7.05	8.27	E05	3.85387	-7.41	7.68
AX-94569385	1B	8.24		E07	3.21991	0.670559	4.1624
AX-94638289	1B	8.24																		E05	3.01011	5.16	6.43
AX-94923277	1B	24.64	qWSC-1B.2													DT	3.83863	-8.77	8.89	DT	3.85387	-9.21	8.61					Xgwm413 at 25.19 cM for WSCG-Low and WSCG-Ste under KI-DS, Li et al. (2015)
AX-94915907	1B	24.64														E02	3.26281	-4.89	4.27	E02	3.08566	-5.05	4.21
AX-94517050	1B	24.64						E03	3.25181	0.48	3.73	E03	3.5867	0.72	4.3
AX-94470806	1B	24.64										E03	3.18046	-0.64	3.68
AX-94948823	1B	24.64																		E02	3.15802	-5.41	4.32
AX-95211457	1B	24.64																		E02	3.04383	-5.3	4.14
AX-94995102	1B	26.22														DT	3.43415	-7.29	8.3	DT	3.5986	-7.86	8.24
AX-94495814	1B	26.22														DT	3.33913	7.2	8.16	DT	3.48812	7.74	8.07
AX-94384779	1B	26.22						RF; E02		0.30; 0.39	5.96; 5.90	RF	3.39041	0.41	5.49
AX-94906568	1B	26.22		E02	3.43843	0.289306	5.70467
AX-94962832	1B	26.22		RF	3.00399	0.252651	6.27709
AX-95165363	1B	32.17	qWSC-1B.3													DT	3.90658	7.31	8.99	DT	3.9431	7.71	8.74					Xbarc187 at 31.5 cM for WSCF-Ste under CK-WW, Li et al. (2015)
AX-94507852	1B	33.75														DT	3.70997	-7.91	8.7	DT	3.84466	-8.46	8.6					Xgwm11 at 34.3 cM for WSC in Lef-Ped at mid grain filling under WW, Zhang et al. (2014); WSC10,30 Fu et al. (2020)
AX-94644908	1B	33.75														DT	3.65956	-7.39	8.62	DT	3.63078	-7.7	8.28
AX-94620208	1B	33.75																		DT	3.12843	-7.49	7.55
AX-94682892	1B	35.34	qWSC-1B.4													DT	3.40894	6.83	8.26	DT	3.50031	7.27	8.09
AX-95152246	1B	35.34		RF	3.04254	0.281496	6.33312
AX-95220675	1B	35.34																		DT	3.11976	-6.55	7.54
AX-95630190	1B	35.71																		DT	3.08672	6.92	7.49
AX-94870113	1B	38.86	qWSC-1B.5																					IR	3.02872	3.16	5.04	Xbarc181 and Xwmc 181 at 38.3 cM for WSCG-Ste under CK-DS and WSCG-Low under KI-DS, Li et al. (2015); WSC10 Fu et al. (2020)
AX-95119047	1B	38.86																						IR	3.02872	3.16	5.04
AX-95161189	1B	38.86																						IR	3.02872	3.16	5.04
AX-94439319	1B	75.01	qWSC-1B.6					E04	3.14267	0.33	4.69	E04	3.33442	0.48	4.82
AX-94766122	1B	75.01						E04	3.09151	-0.33	4.61	E04	3.32975	-0.48	4.81
AX-94783957	1B	75.01										E04	3.14448	-0.47	4.53
AX-94759528	1B	97.59	qWSC-1B.7	E01	3.06637	-0.308923	5.13566																					Xwmc830-Xwmc44 at 96.5 cM for WSCm, WRRps, WSCRpr and WRRpr, Oveden et al. (2017)
AX-94727795	1B	107.81	qWSC-1B.8					E04	3.37675	0.44	5.04	E04	3.39469	0.63	4.91													Xgwm259 at 106.8 cM for WSCG-Low under KI-DS, Li et al. (2015); WSC10 Fu et al. (2020)
AX-94604435	1B	111.86	qWSC-1B.9	DT	3.21221	-0.379465	6.17669
AX-94673495	1B	111.86		DT	3.18742	-0.375382	6.14025
AX-95633864	1B	126.19	qWSC-1B.10									DT	3.06048	-0.51	3.85
AX-94946032	1B	147.26	qWSC-1B.11					RF	3.23657	0.23	5.38
AX-94939596	1D	137.62	qWSC-1D.1					E08	3.58503	0.47	5.97	E08	3.56384	0.69	5.94
AX-94910560	2A	1.59	qWSC-2A.1					E07	3.02687	0.48	5.13
AX-94852639	2A	83.23	qWSC-2A.2					E06	3.48149	-0.36	4.19	E06	3.49894	-0.5	4.25
AX-95021775	2A	83.23						E06	3.4318	0.36	4.12	E06	3.48149	0.49	4.22
AX-94517392	2A	83.23						E06	3.23657	-0.34	3.82	E06	3.24033	-0.47	3.86
AX-94459198	2A	83.23						E06	3.08619	0.33	3.6	E06	3.09909	0.46	3.65
AX-94966169	2A	83.23						E06	3	0.32	3.47	E06	3.02	0.45	3.53
AX-94903997	2A	83.23										E06	3.0278	-0.46	3.54
AX-94964907	2A	83.23																						E03	3.59517	-10.66	6.8
AX-94411894	2A	83.6						IR	3.18046	-0.22	4.78	IR	3.33348	-0.32	4.86
AX-94902101	2A	83.6		IR	3.00954	-0.226696	4.07665
AX-94582262	2A	83.6		IR	3.00182	-0.229452	4.06518
AX-94665408	2A	84.36		IR	3.04288	-0.230277	4.12626
AX-94416062	2A	164.09	qWSC-2A.3									E07	3.12552	0.37	5.23													WSC30 Fu et al. (2020)
AX-95135556	2A	178.03	qWSC-2A.4					E04; DT		-0.38; -0.25	5.26; 4.12	E04; DT		-0.52; -0.35	4.90; 3.88													WSC20,30 Fu et al. (2020)
AX-94865722	2A	179.61						E04; DT		0.40; 0.24	5.85; 3.99	E04; DT		0.56; 0.34	5.58; 3.80													WSC20,30 Fu et al. (2020)
AX-94560557	2A	179.61						E04; DT		0.40; 0.25	5.78; 4.28	E04; DT		0.55; 0.35	5.51; 4.09
AX-94832247	2A	179.61						E04	3.69897	0.39	5.53	E04	3.66756	0.55	5.32
AX-95114107	2A	179.61						E04	3.4318	0.38	5.12	E04	3.451	0.54	4.99
AX-94910470	2A	179.61						DT	3.18046	-0.31	4.13	DT	3.10127	-0.44	3.91													WSC20,30 Fu et al. (2020)
AX-94444084	2A	179.61						E04	3.12494	-0.35	4.66	E04	3.10073	-0.5	4.46
AX-95630341	2B	27.22	qWSC-2B.1																					E07	3.37469	-12.61	5.19
AX-95163397	2B	27.22																						E07	3.30277	-12.98	5.08
AX-94754932	2B	27.22																						E08	3.07469	-14.46	5.63
AX-94430027	2B	75.45	qWSC-2B.2																					IR	3.05012	-3.74	5.08
AX-94838738	2B	76.24																						IR	4.01278	-3.79	6.52
AX-94865451	2B	76.24																						IR	3.78781	-3.63	6.18
AX-94500252	2B	76.24																						IR	3.51286	-3.47	5.76
AX-95235132	2B	76.24																						IR	3.46218	3.41	5.69
AX-95231094	2B	76.24																						IR	3.37572	-3.97	5.56
AX-94759687	2B	76.24																						IR	3.34679	-4.04	5.52
AX-94856684	2B	76.24																						IR	3.10846	-3.71	5.16
AX-95138506	2B	76.38																						DT	3.08725	-6.24	5.23
AX-94852847	2B	76.38																						DT	3.02411	6.17	5.14
AX-94860010	2B	76.38																						DT	3.02411	-6.17	5.14
AX-94614804	2B	77.03																						DT	3.3363	-6.5	5.6
AX-94621282	2B	77.03																						DT	3.21396	-6.41	5.42
AX-95138084	2B	77.03																						DT	3.1831	6.54	5.38
AX-94966084	2B	83.31	qWSC-2B.3	E08	3.34073	-1.10247	4.92841
AX-94975611	2B	83.31		E08	3.28004	1.31914	4.83747
AX-94891219	2B	83.31		E08	3.18285	1.07455	4.69229
AX-95204493	2B	83.31		E08	3.13372	-1.02069	4.61909
AX-94747151	2B	83.31		E08	3.0737	-1.00119	4.52986
AX-94696960	2B	89.05	qWSC-2B.4	E02	3.44455	0.58918	5.71382																					Excalibur_c40229_76, 88 cM, Dong et al. (2016) ; P35/M76-1 at 88 cM for WSC-C, Rebetzke et al. (2008)
AX-95180258	2B	89.05		E02	3.17802	0.571443	5.31714
AX-94491160	2B	102.12	qWSC-2B.5	E04	3.03052	-0.426311	5.55737
AX-94415371	2B	102.12																		RF	3.01457	3.39	4.41
AX-94587505	2B	103.81		E03	3.3179	0.391139	3.8759
AX-94386142	2B	103.81																		IR	3.04191	4.56	5.83
AX-94812268	2B	104.59	qWSC-2B.6													DT	3.09854	-6.78	7.81	DT	3.01233	-7	7.38					WSC20,30 Fu et al. (2020)
AX-94565831	2B	104.59		E08	3.68758	1.16472	5.45174
AX-95105170	2B	104.59		E08	3.48331	1.47152	5.1428
AX-94708698	2B	105.38		DT	3.99538	-0.379445	7.34373																					WSC10,20 Fu et al. (2020)
AX-94485462	2D	161.27	qWSC-2D.1																					E04	3.61439	-9.27	6.64
AX-95147056	2D	161.27																						E04	3.26281	-8.34	6.12
AX-94499721	2D	170.23	qWSC-2D.2																					E04	3.57187	-10.25	6.58
AX-94799113	2D	201.08	qWSC-2D.3																					E04	3.49621	10.7	6.46
AX-94730452	2D	201.08																						E04	3.36653	9.87	6.27
AX-94488983	2D	201.22																						E04	3.95078	10.9	7.15
AX-95659061	2D	213.76	qWSC-2D.4																					E04	3.1707	9.25	5.98
AX-94512149	2D	290.12	qWSC-2D.5	E05	3.11318	0.363653	3.9192																					WSC10,20 Fu et al. (2020)
AX-94433535	2D	295.13	qWSC-2D.6													E08	3.45469	13.8	5.38	E08	3.39041	14.62	5.25
AX-94589168	2D	295.13		RF	3.01475	0.199061	6.29272									E05	3.35853	-5.2	7.41	E05	3.27491	-5.48	6.82					WSC10,20 Fu et al. (2020)
AX-95230892	2D	295.13														E08	3.10958	12.21	4.87	E08	3.12436	13.13	4.85					WSC10 Fu et al. (2020)
AX-95148936	3A	42.7	qWSC-3A.1	IR	3.02539	-0.274623	4.10023
AX-94582729	3A	70.64	qWSC-3A.2													E02	3.46597	11.18	4.58	E02	3.69465	12.6	5.12
AX-94401383	3A	70.64														E02	3.10958	11.18	4.04	E02	3.31515	12.58	4.55
AX-94972883	3A	70.64														E02	3.08197	11.32	4	E02	3.28233	12.75	4.5
AX-95011264	3A	70.64																		E02	3.1512	12.25	4.3
AX-94710575	3A	71.01														E02	3.11351	11.01	4.05	E02	3.266	12.28	4.48					WSC10 Fu et al. (2020)
AX-94884816	3A	71.01														E02	3.10958	-11.18	4.04	E02	3.31515	-12.58	4.55
AX-94389041	3A	71.01														E02	3.10958	11.18	4.04	E02	3.31515	12.58	4.55
AX-94433044	3A	71.01														E02	3.10958	11.18	4.04	E02	3.31515	12.58	4.55					WSC20 Fu et al. (2020)
AX-94453523	3A	71.01														E02	3.10958	11.18	4.04	E02	3.31515	12.58	4.55
AX-95080387	3A	71.01														E02	3.05404	10.88	3.96	E02	3.27819	12.3	4.5					WSC20 Fu et al. (2020)
AX-95225454	3A	77.94	qWSC-3A.3													DT; E04		-12.80; -13.66	10.09; 9.40	DT	4.58336	-13.3	9.7
AX-94472299	3A	77.94														DT; E04		-12.36; -13.98	9.72; 9.60	DT	4.37161	-12.89	9.38
AX-95204178	3A	77.94														DT; E04		11.15; 12.97	9.59; 9.74	DT; E04		11.71; 13.20	9.32; 8.89
AX-94765551	3A	77.94														DT	3.32883	-10.07	8.14	DT	3.35754	-10.59	7.88
AX-95147942	3A	77.94														DT	3.19654	9.95	7.95	DT	3.24185	10.5	7.72
AX-94941647	3A	77.94														E08	3.16622	-16.71	4.95	E08	3.06148	-17.56	4.76
AX-94606333	3A	77.94														DT	3.16241	9.76	7.9	DT	3.20551	10.3	7.66
AX-94943204	3A	77.94														DT	3.15181	9.79	7.89	DT	3.21396	10.37	7.68
AX-94709825	3A	77.94																						E07	3.54061	10.83	5.43
AX-95136005	3A	84.43	qWSC-3A.4	E03	3.14622	-0.408829	3.61667
AX-94507107	3A	84.43																						E06	3.42597	-12.64	5.77	WSC10 Fu et al. (2020)
AX-94661464	3A	84.43																						E06	3.27901	-12.34	5.56	WSC10 Fu et al. (2020)
AX-94481094	3A	115.19	qWSC-3A.5					E07	3.06048	0.32	5.18	E07	3.26922	0.49	5.45
AX-94941121	3A	115.9										E07	3.0716	0.48	5.16
AX-94701839	3A	127.08	qWSC-3A.6													DT	3.04721	-10.24	7.74	DT	3.01728	-10.66	7.39
AX-95630312	3A	130.15	qWSC-3A.7													DT	3.06399	-10.81	7.76	DT	3.17393	-11.61	7.62
AX-94501648	3A	130.15																		DT	3.05849	-11.14	7.45
AX-94850054	3A	130.15																		DT	3.03058	11.16	7.41
AX-94498500	3A	198.54	qWSC-3A.8													E03	3.80967	13.02	5.07	E03	3.85699	13.65	5.15
AX-94563363	3A	229.06	qWSC-3A.9																					E02	3.11634	7.78	4.63
AX-94700643	3A	250.41	qWSC-3A.10													E02	3.18243	4.21	4.15	E02	3.04721	4.43	4.15	E02	3.06248	6.03	4.55
AX-94447466	3A	253.58	qWSC-3A.11																					IR	3.08672	-4.45	5.13
AX-94838498	3A	258.94	qWSC-3A.12	E01	3.04683	-0.215086	5.10684																					WSC20,30 Fu et al. (2020)
AX-94730299	3B	0.79	qWSC-3B.1	E01	4.76157	0.356984	7.70727
AX-95180632	3B	0.79		E01	3.19103	0.285825	5.31998
AX-94902398	3B	83.69	qWSC-3B.2													E07	3.98297	-12.92	6.51	E07	4.01909	-13.66	6.57					RAC875_c35720_229 and RAC875_c35720_456 at 82 cM, wsnp_Ex_rep_c68193_66971396 at 83 cM, Dong et al. (2016), WSC20, Fu et al. (2020)
AX-94426633	3B	83.69														E07	3.92082	12.65	6.41	E07	3.9914	13.45	6.53
AX-94542642	3B	83.69										E07	3.08672	0.39	5.18	E07	3.34199	10.53	5.54	E07	3.47886	11.34	5.75
AX-94850105	3B	83.69		E04	3.63555	0.481485	6.46066
AX-95155185	3B	83.69		E04	3.59413	0.481841	6.39822
AX-95131118	3B	83.69		E04	3.38704	-0.47636	6.08729
AX-94721496	3B	83.69		E04	3.2335	0.501784	5.85821
AX-95210006	3B	83.69		E04	3.04508	0.454793	5.57886
AX-94629147	3B	84.9														E07	3.07883	-10.74	5.15	E07	3.11238	-11.38	5.21
AX-94607867	3B	84.9						IR	3.40894	0.31	5.13	IR	3.40121	0.43	4.96
AX-94674372	3B	84.9																						E06	3.47496	12.36	5.85
AX-94639947	3B	84.9																						E06	3.13668	11.57	5.35
AX-95632086	3B	84.9																						E06	3.02733	-11.23	5.18
AX-94671810	3B	85.27														E07	3.38091	11.79	5.6	E07	3.25337	12.13	5.41	E06	4.10902	-12.52	6.81	P40/M54-7 at 86 cM for WSC-A, Rebetzke et al. (2008); WSC20, Fu et al. (2020)
AX-94620197	3B	85.27														E07	3.16178	-10.62	5.28	E07	3.23359	-11.33	5.39
AX-95008727	3B	85.27														E07	3.15614	-10.91	5.27	E07	3.14388	-11.45	5.25
AX-94786575	3B	85.27						E01	3.08619	-0.2	4.46	E01	3.11014	-0.28	4.52
AX-94504455	3B	85.27						E01	3.02687	-0.2	4.38	E01	3.01189	-0.27	4.38
AX-94876042	3B	85.27						E05	3.02687	0.26	3.58	E05	3.11577	0.38	3.64					E05	3.10458	5.84	6.57
AX-95003780	3B	85.27		E06	3.82412	0.347995	7.51207
AX-94943216	3B	85.27		E04	3.27059	-0.650547	5.91343
AX-95222171	3B	85.27		E06	3.16078	-0.314831	6.53173
AX-95192766	3B	85.27		E04	3.06675	-0.614124	5.61089
AX-94449277	3B	85.27		E04	3.00904	0.6376	5.52568
AX-94880272	3B	85.27		E04	3.00904	0.6376	5.52568
AX-94843023	3B	85.27		E04	3.00904	-0.6376	5.52568
AX-94916900	3B	85.27		E04	3.00904	-0.6376	5.52568
AX-94599954	3B	85.27																						E06	3.56225	-12.44	5.98
AX-94532320	3B	85.27																						E06	3.45967	-11.41	5.83
AX-95101481	3B	85.27																						E06	3.36351	11.02	5.68
AX-94496337	3B	85.27																						E06	3.17393	-10.78	5.4
AX-94879889	3B	85.27																						E06	3.07779	-10.66	5.26
AX-94461641	3B	101.87	qWSC-3B.3	E08	3.26153	1.32627	4.80978
AX-95232057	3B	102.29																						E08	3.33442	13.89	6.01	WSC10 Fu et al. (2020)
AX-94481626	3B	127.67	qWSC-3B.4					IR	3.14874	-0.18	4.74	IR	3.29243	-0.26	4.8									DT	3.59688	7.41	5.99	Xksum45-Xwmc510 at 127.3 cM for WSCf, Oveden et al (2017)
AX-94777130	3B	170.31	qWSC-3B.5																	E03	3.00218	8.43	3.86
AX-94637066	3D	1.69	qWSC-3D.1																					DT	4.17134	-7.14	6.86	abg471 at 1 cM for WSC-T, Rebetzke et al. (2008)
AX-95180153	3D	91.95	qWSC-3D.2																					E07	4.11862	11.79	6.31
AX-94524892	3D	91.95																						E07	3.68613	10.64	5.66
AX-94845398	3D	91.95																						E07	3.30016	9.79	5.07
AX-94752046	3D	91.95																						E07	3.00218	9.12	4.63
AX-94968108	3D	158.35	qWSC-3D.3																					E04	3.15739	7.72	5.96	WSC10,30 Fu et al. (2020)
AX-94896736	3D	175.97	qWSC-3D.4					E08	3.58503	0.38	5.95	E08	3.62342	0.56	6.02					E08	3.01011	11.09	4.68					WSC20,30 Fu et al. (2020)
AX-94776807	4A	162.35	qWSC-4A.1					E05	3.22185	0.24	3.87	E05	3.26841	0.35	3.87
AX-94619716	4A	214.31	qWSC-4A.2					E06	3.284	-0.31	3.89	E06	3.22695	-0.43	3.84													WSC30 Fu et al. (2020)
AX-94717107	4B	21.63	qWSC-4B.1																					IR	3.89963	-3.64	6.35
AX-94556198	4B	21.63																						IR	3.5986	-3.47	5.89
AX-94546364	4B	21.63																						IR	3.59176	3.48	5.88	WSC30 Fu et al. (2020)
AX-95123139	4B	21.63																						IR	3.58336	-3.43	5.87
AX-95192358	4B	21.63																						IR	3.30539	3.71	5.45	WSC30 Fu et al. (2020)
AX-94577088	4B	21.63																						IR	3.11634	3.55	5.17
AX-95130980	4B	86.54	qWSC-4B.2													E04	3.15243	-12.95	9.6	E04	3.05502	-13.4	8.84
AX-95169219	4B	86.54																						E03	3.2652	6	6.31
AX-95189919	4B	86.54																						E03	3.03012	5.68	5.97
AX-95085087	4B	106.27	qWSC-4B.3																					E04	3.48017	10.55	6.44
AX-94610810	5A	13.46	qWSC-5A.1													E01	3.39147	3.87	6.47	E01	3.39041	4.06	6.49
AX-95009904	5A	13.83														E01	3.02919	4.35	5.94	E01	3.10679	4.64	6.07
AX-94497226	5A	43.27	qWSC-5A.2	E01	4.08153	0.294801	6.65997
AX-94460229	5A	43.27		E01	4.0045	0.290617	6.54257																					WSC10,20 Fu et al. (2020)
AX-94438404	5A	43.27		E01	3.81809	-0.28012	6.25958																					WSC10,20 Fu et al. (2020)
AX-95079355	5A	44.2		E01	4.68047	0.325453	7.58138
AX-94946660	5A	47.82	qWSC-5A.3					E07	3.14267	0.33	5.3	E07	3.2636	0.5	5.44													Xcfd2121-Xgwm639 at 47.1 cM for WRRps, Oveden et al. (2017)
AX-94534858	5A	69	qWSC-5A.4					E04	3.52288	0.72	5.25	E04	3.59176	1.03	5.21
AX-94909029	5A	72.22	qWSC-5A.5					E06	3.55284	-0.46	4.29	E06	3.54516	-0.64	4.32
AX-95139065	5A	81.74	qWSC-5A.6					RF	3.72125	0.23	6.1	RF	3.63264	0.32	5.86													WSC20,30 Fu et al. (2020)
AX-94535450	5A	104.28	qWSC-5A.7													E02	3.03012	4.28	3.92
AX-94930932	5A	104.87														E02	3.40012	-4.73	4.48	E02	3.04048	-4.77	4.14
AX-94915562	5B	16.31	qWSC-5B.1					E04	3.05061	0.41	4.55																	P41/M48-178 at 16 cM for WSC-A, Rebetzke et al. (2008)
AX-94536572	5B	16.31						E04	3.01773	0.4	4.5
AX-94711329	5B	45.36	qWSC-5B.2													E03	3.42481	10.13	4.48	E03	3.29671	10.3	4.3
AX-94761289	5B	45.36														E03	3.37572	10.08	4.4	E03	3.24795	10.24	4.23
AX-95251547	5B	45.36																						E07	3.22988	-9.93	4.97
AX-94729346	5B	52.43	qWSC-5B.3					E04	3.16115	0.42	4.71
AX-94731059	5B	52.43						E04	3.05061	0.41	4.55
AX-94605952	5B	53.01														E03	3.10791	11.32	4	E03	3.16622	11.9	4.1
AX-94727027	5B	53.01																		E03	3.04915	11.62	3.93
AX-94430767	5B	54.23						E04	3.00877	0.41	4.49
AX-94593432	5B	55.01	qWSC-5B.4																	E03	3.11182	10.11	4.02
AX-94419960	5B	55.29						E07; IR		-0.61; -0.26	6.69; 4.81	E07; IR		-0.87; -0.38	6.39; 4.75
AX-94454107	5B	55.29						E07	3.76955	-0.54	6.25	E07	3.57512	-0.77	5.91
AX-95105243	5B	55.29						E07; IR		-0.54; -0.25	6.18; 4.88	E07; IR		-0.76; -0.35	5.83; 4.85
AX-94490070	5B	55.29						E07	3.69897	-0.56	6.14	E07; IR		-0.80; -0.35	5.94; 4.38
AX-94439232	5B	55.29		E03	4.14072	0.504196	5.13926
AX-94484139	5B	55.29		E03	3.51274	0.450824	4.17203
AX-94433869	5B	55.29																		E03	3.02457	11.48	3.89
AX-94562038	5B	56.42														E03	3.21753	10.63	4.17	E03	3.27003	11.16	4.26
AX-94523793	5B	92.95	qWSC-5B.5																	E03	3.09528	14.25	4
AX-94488630	5B	97.55	qWSC-5B.6	E02	3.21759	0.283805	5.37579
AX-94797597	5B	158.47	qWSC-5B.7													E01	3.93181	-4.97	7.28	E01	4.12901	-5.37	7.59
AX-94923750	5B	160.16														E01	3.81816	5	7.11	E01	3.95468	5.36	7.33
AX-94504637	5B	160.16																		E01	3.05208	-4.47	5.99
AX-94673667	5B	163.54	qWSC-5B.8																					E04	3.39469	-8.23	6.31
AX-95108292	5B	186.7	qWSC-5B.9									E03	3.2204	0.38	3.75
AX-94673840	5B	201.42	qWSC-5B.10	E02	3.05368	-0.307864	5.13341
AX-94822453	5B	210.93	qWSC-5B.11													E02	3.15428	-8.72	4.11
AX-94492507	5B	219.91	qWSC-5B.12	E02	3.6867	-0.477587	6.07739
AX-94436033	5B	219.91		IR	3.0655	0.320623	4.15995
AX-94668872	5B	219.91		IR	3.00367	-0.330646	4.06792
AX-94436366	5B	220.94		E02	3.97104	0.497624	6.50787
AX-94444933	5B	220.94		E02	3.74109	0.496926	6.15943
AX-95090344	5B	220.94		E02	3.45015	-0.454455	5.72219
AX-94559013	5B	232.28	qWSC-5B.13													E08	3.56703	12.05	5.55	E08	3.65758	13.11	5.65
AX-94623577	5B	232.28														E08	3.01189	11.99	4.72
AX-94402018	5B	234.13		E04	3.06549	0.394328	5.60903																					WSC20,30 Fu et al. (2020)
AX-94725198	5B	273.57	qWSC-5B.14	E01	4.22477	0.321392	6.87896
AX-94783697	5B	273.57		E01	4.20912	0.32394	6.855
AX-94685470	5B	275.87	qWSC-5B.15	E01	3.56928	-0.283253	5.88439
AX-95231332	5B	277.56		E01	3.28688	0.266694	5.46229
AX-94745281	5B	277.56		E01	3.20143	0.261185	5.33539
AX-94923716	5D	1.58	qWSC-5D.1													E06	3.2668	-9.81	3.49	E06	3.29414	-10.7	3.49
AX-95078137	5D	1.58														E06	3.21824	-8.89	3.42	E06	3.11014	-9.45	3.22
AX-94737415	5D	1.58														E06	3.18046	9.6	3.36	E6	3.00082	10.0586	3.05209
AX-94649755	5D	4.8	qWSC-5D.2					E06	3.56864	0.44	4.33	E06	3.7122	0.62	4.58
AX-94995255	6A	0	qWSC-6A.1													DT	3.38934	-12.46	8.23	DT	3.52433	-13.41	8.13
AX-95685387	6A	0						DT; E04		0.51; 0.70	5.20; 5.18	DT; E04		0.73; 0.97	5.20; 4.97
AX-94556117	6A	26.51	qWSC-6A.2					E08	3.33724	-0.36	5.59	E08	3.50031	-0.53	5.84	E08	3.75945	-11.5	5.84	E08	3.83268	-12.47	5.91					Xgwm358 at 26.2 cM for WSC in Non-leaf-Low, Non-leaf-Ste and Leaf-Ste under DS and for WSC in Total-low under WW, Zhang et al. (2014)
AX-94543047	6A	26.51																						RF	3.19518	-5.62	5.57
AX-94534539	6A	102.4	qWSC-6A.3													E04	3.60033	10.88	10.24	E04	3.41117	11.03	9.35
AX-94585912	6A	102.4														E04	3.46852	10.42	10.05	E04	3.29158	10.59	9.18
AX-95629023	6A	103.98														E04	3.64782	-10.75	10.31	E04	3.49894	-10.95	9.48
AX-94836678	6A	103.98														E04	3.06298	-8.79	9.47
AX-94651692	6A	120.35	qWSC-6A.4					IR	3.46852	-0.24	5.22	IR	3.32148	-0.33	4.84
AX-94746667	6A	120.35						IR	3.18046	-0.23	4.78	IR	3.0846	-0.32	4.49
AX-94424668	6A	221.75	qWSC-6A.5					DT	3.49485	0.26	4.62	DT	3.51286	0.36	4.53													WSC20 Fu et al. (2020)
AX-94770913	6A	221.75						DT	3.16749	0.27	4.11	DT	3.04721	0.38	3.83													WSC20 Fu et al. (2020)
AX-95147877	6A	221.75						E08	3.09151	-0.43	5.22																	WSC20 Fu et al. (2020)
AX-94446754	6B	35.83	qWSC-6B.1													E08	3.4045	-19.58	5.31	E08	3.49214	-21.31	5.4					Xmag1266-Xmag962 at 36.3 cM for WRRpr, Oveden et al. (2017)
AX-94426619	6B	45.96	qWSC-6B.2					E03	3.09691	-0.3	3.5
AX-94522639	6B	45.96										E01	3.01233	-0.41	4.38
AX-94704405	6B	62.83	qWSC-6B.3													E02	3.0846	-6.04	4	E02	3.1549	-6.63	4.31					WSC30 Fu et al. (2020)
AX-94553893	6B	62.83						E05	4	-0.45	5.04	E05	3.96257	-0.63	4.93
AX-95023059	6B	62.83						IR	3.31876	0.3	5	IR	3.33161	0.42	4.86
AX-94393025	6B	62.83		E05	3.27765	-0.320914	4.1663
AX-94950339	6B	81.39	qWSC-6B.4																	DT	3.12494	7.38	7.55					WSC20 Fu et al. (2020)
AX-94759235	6B	131.81	qWSC-6B.5																					E03	3.00218	5.76	5.93
AX-94426796	6D	17.65	qWSC-6D.1																					E06; RF		-12.94; -7.98	5.88; 5.37	P42/M50-4 at 16 cM for WSC-C, Rebetzke et al. (2008); WSC30, Fu et al. (2020)
AX-95120751	6D	17.65																						E06; RF		-12.94; -7.98	5.88; 5.37
AX-94921095	6D	17.65																						E06; RF		-13.37; -8.45	5.64; 5.32
AX-94413225	6D	17.65																						E06; RF		-13.35; -8.68	5.58; 5.47
AX-95197613	6D	17.65																						E06	4.26761	-12.87	7.05
AX-94803211	6D	17.65																						IR	3.01773	-3.72	5.03
AX-94631103	6D	83.87	qWSC-6D.2					RF	3.17393	0.19	5.28	RF	3.15802	0.27	5.15	RF	3.14997	3.23	4.39	RF	3.31785	3.63	4.86
AX-94437232	6D	83.87						RF	3.5376	0.2	5.82	RF	3.51004	0.28	5.67
AX-94916179	6D	83.87						RF; E06		-0.20; -0.29	5.76; 3.59	RF	3.46597	-0.28	5.61					RF	3.06198	-3.44	4.48
AX-94821347	6D	83.87																		RF	3.0381	-3.49	4.44
AX-94888880	7A	27.21	qWSC-7A.1					E06	3.67778	-0.48	4.49	E06	3.66959	-0.66	4.51	E06	4.36051	-9.89	5.18	E06	4.54061	-10.97	5.43					Xbarc1034-Xwmc273 at 26.7 cM for WSCf, WSCg and WCRps, Oveden et al. (2017); bcd873a at 27 cM for WSC-T, Rebetzke et al. (2008), WSC10, Fu et al. (2020)
AX-95153090	7A	27.21						E06	3.74473	0.48	4.61	E06	3.73049	0.67	4.6	E06	4.18977	9.69	4.92	E06	4.39903	10.8	5.2
AX-95629557	7A	27.21														E06	3.4318	-8.91	3.75	E06	3.53313	-9.82	3.86
AX-95193824	7A	27.21														E06	3.22403	-9	3.43	E06	3.34582	-9.97	3.57
AX-94821252	7A	27.21														E06	3.07417	-8.62	3.2	E06	3.18442	-9.54	3.33
AX-94573457	7A	27.21																		E06	3.04431	9.42	3.12
AX-94428682	7A	29.86	qWSC-7A.2																	E06	3.10403	6.73	3.21	E07	3.47237	-8.74	5.33
AX-94648060	7A	29.86		E06	3.80415	-0.348883	7.48224
AX-94506129	7A	29.86		DT	3.71698	-0.693292	6.92548
AX-95683847	7A	29.86		DT	3.52738	0.336564	6.64271
AX-94505773	7A	29.86		DT	3.50053	-0.345414	6.60281
AX-94682492	7A	29.86		DT	3.30909	0.322314	6.3194																					WSC10,30 Fu et al. (2020)
AX-94527434	7A	29.86		DT	3.27161	0.317336	6.26413
AX-95200397	7A	29.86		E06	3.16494	0.346224	6.5378
AX-95632295	7A	29.86		DT	3.14463	0.311509	6.07746
AX-94801490	7A	29.86		DT	3.12358	0.324111	6.0466																					WSC30 Fu et al. (2020)
AX-95083163	7A	29.86		E06	3.0769	-0.34013	6.40939
AX-95224185	7A	29.86		RF	3.03665	-0.197243	6.32455																					WSC30 Fu et al. (2020)
AX-95231996	7A	29.86		E06	3.03153	-0.315743	6.34339																					WSC30 Fu et al. (2020)
AX-94749619	7A	29.86		E06	3.01695	0.317982	6.3222																					WSC30 Fu et al. (2020)
AX-94586454	7A	29.86										DT	3.14691	-0.4	3.98
AX-94507941	7A	29.86																						E07	3.266	9.13	5.02
AX-94513729	7A	29.86																						E05	3.07469	10.27	5.32
AX-94735683	7A	29.86																						E05	3.05601	6.82	5.3	WSC10 Fu et al. (2020)
AX-94535557	7A	29.9														E06	3.2321	-6.34	3.44	E06	3.21824	-6.85	3.38
AX-94627932	7A	29.9														E06	3.04479	6.16	3.16	E06	3.10292	6.75	3.21
AX-95652683	7A	29.9														DT	3.0942	7.46	7.8
AX-94536859	7A	30.66																						E06	3.14997	-15.63	5.36
AX-94398361	7A	33.72	qWSC-7A.3													E02	3.10292	5.12	4.03
AX-94599642	7A	109.61	qWSC-7A.4	E01	3.10741	0.318295	5.19624																					WSC10 Fu et al. (2020)
AX-95111986	7A	113.4	qWSC-7A.5																					E06; RF		10.80; 7.07	5.53; 5.61	Xbarc195-Xbarc121 at 113.2 cM for WSCf and WSCm, Oveden et al. (2017)
AX-95121537	7A	113.4																						IR	3.09151	3.42	5.14
AX-94394242	7A	187.43	qWSC-7A.6	DT	3.04026	-0.469412	5.9247
AX-94799912	7A	193.85	qWSC-7A.7	E03	3.09981	-0.401456	3.54689
AX-94874561	7B	30.48	qWSC-7B.1					E05	3.37675	-0.26	4.1	E05	3.32606	-0.36	3.96	E06	3.27572	-6.28	3.51	E06	3.24565	-6.77	3.42					WSC10,30 Fu et al. (2020)
AX-94819762	7B	30.48						E05	3.60206	0.28	4.45	E05	3.62709	0.39	4.41					E06	3.03527	6.56	3.1
AX-94807717	7B	30.48						E05	3.284	0.26	3.97	E05	3.24336	0.36	3.83													WSC10,30 Fu et al. (2020)
AX-94469114	7B	30.48						E05	3.27572	0.46	3.95	E05	3.14026	0.63	3.68													WSC10,30 Fu et al. (2020)
AX-94859831	7B	30.48						E05	3.21467	-0.25	3.86	E05	3.18642	-0.35	3.75													WSC10,30 Fu et al. (2020)
AX-95153421	7B	31.11						E05	3.11351	0.42	3.71	E05	3.00261	0.58	3.47
AX-95238582	7B	31.11						E05	3.11351	0.42	3.71	E05	3.00261	0.58	3.47													WSC10,30 Fu et al. (2020)
AX-94457721	7B	34.33	qWSC-7B.2					E05	3.74473	0.37	4.68	E05	3.6216	0.51	4.41													Xgwm537 at 35.2 cM for WSCG-Ste under CK-DS, Li et al. (2015); Xgwm537 at 35.2 cM for WSC in Lef-Ped and Leaf-low at midgrain filling under DS, Zhang et al. (2014)
AX-95175842	7B	92.74	qWSC-7B.3	RF	3.06519	-0.295681	6.36607																					Xwmc517 at 92.5 cM for Non-leaf-Ped, -Low and -Ste at mid grain filling under WW, Zhang et al. (2014)
AX-94433504	7B	92.74																						E08	3.04431	8.42	5.58
AX-94383753	7B	96.68	qWSC-7B.4													E08	3.36151	10.65	5.24	E08	3.44009	11.58	5.32
AX-94755097	7B	116.51	qWSC-7B.5	E08	3.52533	1.37118	5.20617
AX-94511428	7B	130.53	qWSC-7B.6																	E02	3.13727	-9.41	4.28
AX-94853061	7B	132.02										IR	3.0942	0.32	4.5
AX-95129629	7B	132.83														E08	3.2815	12.13	5.12	E08	3.451	13.4	5.34					WSC30 Fu et al. (2020)
AX-94716438	7B	132.83														E08	3.24033	-12.04	5.06	E08	3.36351	-13.19	5.21					WSC30 Fu et al. (2020)
AX-94786548	7B	132.83														E08	3.21681	-12	5.02	E08	3.4045	-13.31	5.27
AX-95195100	7B	132.83														E08	3.13194	11.87	4.9	E08	3.28819	13.1	5.09
AX-94619468	7B	132.83						E02	3.72125	-0.36	6.6	E02	3.97469	-0.51	7.01
AX-94946024	7B	132.83						E02	3.61979	0.35	6.44	E02	3.88273	0.5	6.87
AX-95631008	7B	132.83						E02	3.39794	-0.34	6.11	E02	3.61798	-0.49	6.47
AX-95629493	7B	132.83						E02	3.37675	-0.34	6.07	E02	3.58838	-0.48	6.42
AX-94431804	7B	132.83						E02	3.16115	0.32	5.75	E02	3.42713	0.47	6.18
AX-95217675	7B	132.83						E02	3.16115	-0.32	5.75	E02	3.42713	-0.47	6.18
AX-95653765	7B	132.83						E02	3.12494	-0.32	5.69	E02	3.39577	-0.47	6.14
AX-94590847	7B	132.83										E02	3.13787	-0.44	5.75
AX-94736889	7D	17.58	qWSC-7D.1	DT	3.52398	-0.353315	6.63767
AX-95122768	7D	129.37	qWSC-7D.2					E08	3.07058	0.64	5.19																	WSC30 Fu et al. (2020)
*Highlighted cells represent stable QTNs

## Sheet: Table S5
Table S5: Details of genes retrived with in 1Mbp window of QTNs alined to IWGSC ref seq1.1
Gene stable ID	Gene description	Chromosome	Gene start (bp)	Gene end (bp)	AFFY wheat probe	Xu et al. (2008)		Kumar et al. (2018)								Interpro ID	GOtermaccession
						TPM RILs	log2	TPM WL711-C	log2	TPM WL711-D	log2	TPM C306-C	log2	TPM C306-D	log2
TraesCS1A02G155200		1A	272611172	272613645	Ta.24987.1.S1_at	3239.87	11.6617	15946.2	13.9609	17687.1	14.1104	10141.1	13.3079	11645.1	13.5074	IPR001236, IPR001252, IPR001557, IPR010945, IPR011274, IPR015955, IPR022383, IPR036291	GO:0003824, GO:0005975, GO:0006108, GO:0016491, GO:0016615, GO:0016616, GO:0019752, GO:0030060, GO:0055114
TraesCS1A02G356500	DNA damage-repair/toleration protein DRT102 [Source:Projected from Arabidopsis thaliana (AT3G04880) UniProtKB/Swiss-Prot;Acc:Q05212]	1A	539702670	539703620	TaAffx.128418.46.A1_at	94.2812	6.5589	327.606	8.35582	328.24	8.35861	432.74	8.75736	471.128	8.87997	IPR003500, IPR011051, IPR012100, IPR014710, IPR036569	GO:0005975, GO:0016853
TraesCS1B02G439900	Glucose-6-phosphate 1-epimerase [Source:UniProtKB/TrEMBL;Acc:A0A1D5SC57]	1B	661558745	661562330												IPR008183, IPR011013, IPR014718, IPR025532	GO:0003824, GO:0005975, GO:0016853, GO:0030246, GO:0047938
TraesCS1B02G443200	Malate dehydrogenase [Source:UniProtKB/TrEMBL;Acc:A0A1D5SBK9]	1B	664297130	664302657												IPR001236, IPR001252, IPR001557, IPR010097, IPR015955, IPR022383, IPR036291	GO:0003824, GO:0005975, GO:0006099, GO:0006108, GO:0016491, GO:0016615, GO:0016616, GO:0019752, GO:0030060, GO:0055114
TraesCS3A02G523900	Glycerol-3-phosphate dehydrogenase [NAD(+)] [Source:UniProtKB/TrEMBL;Acc:A0A1D5V995]	3A	739152544	739157734	Ta.1580.1.A1_a_at	9.6975	3.27761	67.3798	6.07424	66.4931	6.05513	53.2632	5.73507	35.3879	5.14518	IPR006109, IPR006168, IPR008927, IPR011128, IPR013328, IPR017751, IPR036291	GO:0004367, GO:0005829, GO:0005975, GO:0006072, GO:0006116, GO:0009331, GO:0016491, GO:0016616, GO:0042803, GO:0046168, GO:0051287, GO:0055114
TraesCS3B02G008500		3B	4259456	4267017												IPR015813, IPR018129, IPR021135, IPR022805, IPR033129	GO:0003824, GO:0005737, GO:0006099, GO:0008152, GO:0008964, GO:0015977, GO:0016829
TraesCS3B02G011200		3B	5134029	5140986												IPR015813, IPR018129, IPR021135, IPR022805, IPR033129	GO:0003824, GO:0006099, GO:0008964, GO:0015977
TraesCS3B02G473800		3B	723031627	723035032	Ta.9372.1.S1_at; Ta.9372.1.S1_x_at	751.523	9.55367	1611.33	10.654	1175.26	10.1988	1190.75	10.2177	2202.86	11.1052	IPR001585, IPR004732, IPR013785, IPR018225	GO:0003824, GO:0004801, GO:0005737, GO:0005739, GO:0005975, GO:0006098, GO:0009507, GO:0009536, GO:0009570, GO:0009809, GO:0033587, GO:0046686
TraesCS3D02G512500		3D	596993603	596995622												IPR000743, IPR006626, IPR011050, IPR012334	GO:0004650, GO:0005975
TraesCS3D02G512900		3D	597264600	597265932												IPR000743, IPR006626, IPR011050, IPR012334	GO:0004650, GO:0005975
TraesCS5A02G014300	Malate dehydrogenase [Source:UniProtKB/TrEMBL;Acc:A0A1D5YVJ9]	5A	9650482	9654885	Ta.14554.2.S1_x_at	331.417	8.3725	1345.9	10.3944	1449.91	10.5017	1216.06	10.248	1396.83	10.4479	IPR001236, IPR001252, IPR001557, IPR010097, IPR015955, IPR022383, IPR036291	GO:0003824, GO:0005975, GO:0006099, GO:0006108, GO:0016491, GO:0016615, GO:0016616, GO:0019752, GO:0030060, GO:0055114
TraesCS5B02G210900		5B	381717109	381720627												IPR000743, IPR006626, IPR011050, IPR012334	GO:0004650, GO:0005576, GO:0005975, GO:0016021, GO:0071555
TraesCS7A02G484200		7A	675394305	675396490												IPR000146, IPR028343, IPR033391	GO:0005975, GO:0016791, GO:0042132
TraesCS7B02G317500		7B	567635382	567636464												IPR001236, IPR001557, IPR011304, IPR015955, IPR022383, IPR036291	GO:0003824, GO:0004459, GO:0005737, GO:0005975, GO:0016491, GO:0016616, GO:0019752, GO:0055114
TraesCS7B02G317900		7B	567883814	567884896												IPR001236, IPR001557, IPR011304, IPR015955, IPR022383, IPR036291	GO:0003824, GO:0004459, GO:0005737, GO:0005975, GO:0016491, GO:0016616, GO:0019752, GO:0055114
TraesCS1A02G152200	Non-lysosomal glucosylceramidase [Source:UniProtKB/TrEMBL;Acc:A0A1D5X9X3]	1A	261815434	261826427	Ta.5625.1.A1_s_at; TaAffx.111528.1.S1_at; TaAffx.60263.1.S1_at	91.5144	6.51593	477.497	8.89935	515.009	9.00845	417.648	8.70614	391.525	8.61296	IPR006775, IPR008928, IPR012341, IPR024462, IPR014551	GO:0003824, GO:0004348, GO:0004553, GO:0006680, GO:0016020
TraesCS1A02G356800		1A	539754423	539758138												IPR000490, IPR012946, IPR017853	GO:0004553, GO:0005975
TraesCS1A02G358800	Beta-galactosidase [Source:UniProtKB/TrEMBL;Acc:W4ZQE3]	1A	540402336	540410089												IPR001944, IPR008979, IPR017853, IPR025300, IPR031330, IPR019801, IPR026283	GO:0004553, GO:0004565, GO:0005975
TraesCS1B02G278400	Beta-galactosidase [Source:UniProtKB/TrEMBL;Acc:A0A1D5S647]	1B	486831241	486839650												IPR000922, IPR001944, IPR008979, IPR017853, IPR019801, IPR031330, IPR041392, IPR043159	GO:0004553, GO:0004565, GO:0005975, GO:0030246
TraesCS2A02G185800	Beta-hexosaminidase [Source:UniProtKB/TrEMBL;Acc:A0A1D5TPG5]	2A	147460938	147463173												IPR015883, IPR017853, IPR025705, IPR029018, IPR029019	GO:0004553, GO:0004563, GO:0005975, GO:0102148
TraesCS2B02G059000	Xyloglucan endotransglucosylase/hydrolase [Source:UniProtKB/TrEMBL;Acc:A0A1D5U713]	2B	28720157	28721589												IPR000757, IPR008263, IPR010713, IPR013320, IPR016455	GO:0004553, GO:0005618, GO:0005975, GO:0006073, GO:0010411, GO:0016021, GO:0016762, GO:0042546, GO:0048046, GO:0071555
TraesCS2B02G122900	Alpha-galactosidase [Source:UniProtKB/TrEMBL;Acc:A0A1D5U6J5]	2B	90397033	90402229												IPR002241, IPR013780, IPR013785, IPR017853, IPR041233	GO:0003824, GO:0004553, GO:0005773, GO:0005975, GO:0052692
TraesCS2B02G389400	Probable beta-D-xylosidase 6 [Source:Projected from Arabidopsis thaliana (AT5G10560) UniProtKB/Swiss-Prot;Acc:Q9LXA8]	2B	553165032	553168778	Ta.1764.1.S1_at	214.992	7.74814	2352.48	11.2	3008.61	11.5549	4226.73	12.0453	6341.12	12.6305	IPR001764, IPR002772, IPR013783, IPR017853, IPR026891, IPR036881, IPR036962	GO:0004553, GO:0005774, GO:0005975
TraesCS2B02G459400		2B	653750565	653752305												IPR000490, IPR012946, IPR017853	GO:0004553, GO:0005975
TraesCS2D02G594400	4-hydroxy-7-methoxy-3-oxo-3, 4-dihydro-2H-1, 4-benzoxazin-2-yl glucoside beta-D-glucosidase 1c, chloroplastic [Source:UniProtKB/Swiss-Prot;Acc:Q1XH04]	2D	648238204	648242750												IPR001360, IPR017853, IPR018120, IPR033132	GO:0004553, GO:0005975, GO:0008152, GO:0008422, GO:0009507, GO:0009536, GO:0016787, GO:0016798, GO:0102483, GO:0102726
TraesCS3B02G311300		3B	499810511	499813883												IPR000490, IPR012946, IPR017853	GO:0004553, GO:0005975, GO:0008152, GO:0016787, GO:0016798, GO:0042973
TraesCS3B02G368800		3B	581087819	581092137												IPR001360, IPR017853, IPR033132	GO:0004553, GO:0005975, GO:0009507, GO:0009536, GO:0016787, GO:0102726
TraesCS3B02G368900		3B	581096064	581096553												IPR001360, IPR017853	GO:0004553, GO:0005975, GO:0009507, GO:0009536, GO:0016787, GO:0102726
TraesCS3B02G369000		3B	581126593	581128177												IPR001360, IPR017853, IPR033132	GO:0004553, GO:0005975
TraesCS3B02G369100		3B	581128797	581135269												IPR001360, IPR017853, IPR033132	GO:0004553, GO:0005975, GO:0009507, GO:0009536, GO:0016787, GO:0102726
TraesCS3B02G369200		3B	581260645	581268739	TaAffx.89472.1.S1_at; TaAffx.89472.1.S1_x_at	5.575	2.47897	18.6791	4.22335	46.9093	5.5518	23.0382	4.52595	25.1879	4.65466	IPR001360, IPR017853, IPR033132	GO:0004553, GO:0005975, GO:0009507, GO:0009536, GO:0016787, GO:0102726
TraesCS3B02G528300		3B	770556671	770557889												IPR000490, IPR017853	GO:0004553, GO:0005975
TraesCS3B02G528400	Endo-beta-1, 3-glucanase [Source:UniProtKB/TrEMBL;Acc:Q1ERG0]	3B	770608963	770610406												IPR000490, IPR017853	GO:0004553, GO:0005975, GO:0008152, GO:0016787, GO:0016798, GO:0042973, GO:0046658
TraesCS3B02G528500	Endo-beta-1, 3-glucanase [Source:UniProtKB/TrEMBL;Acc:Q1ERG2]	3B	770652140	770653582												IPR000490, IPR017853	GO:0004553, GO:0005975, GO:0008152, GO:0016787, GO:0016798, GO:0042973, GO:0046658
TraesCS3B02G529100		3B	770952582	770953739												IPR000490, IPR017853	GO:0004553, GO:0005975
TraesCS3B02G529300		3B	770968831	770970473	Ta.28.1.S1_at	208.475	7.70373	73.639	6.2024	410.813	8.68234	41.4609	5.37368	199.551	7.64062	IPR000490, IPR017853	GO:0004553, GO:0005975
TraesCS3B02G529400		3B	771052970	771054568												IPR000490, IPR017853	GO:0004553, GO:0005975
TraesCS3B02G529700		3B	771170728	771172667	Ta.28.1.S1_at	208.475	7.70373	73.639	6.2024	410.813	8.68234	41.4609	5.37368	199.551	7.64062	IPR000490, IPR017853	GO:0004553, GO:0005975
TraesCS3B02G529800		3B	771190279	771195541												IPR000490, IPR017853	GO:0004553, GO:0005975
TraesCS3B02G530000		3B	771249725	771254291												IPR000490, IPR017853	GO:0004553, GO:0005975
TraesCS3B02G530500		3B	771532288	771534116	Ta.27107.1.S1_at	10.9938	3.45861	15.8302	3.98461	7.24949	2.85788	2.86881	1.52045	13.3755	3.74153	IPR000490, IPR017853	GO:0004553, GO:0005975, GO:0008152, GO:0016787, GO:0016798
TraesCS3B02G530600		3B	771557907	771560234												IPR000490, IPR017853	GO:0004553, GO:0005975, GO:0008152, GO:0016787, GO:0016798
TraesCS3D02G512300		3D	596889809	596891831	Ta.5232.2.S1_a_at	32.4006	5.01795	8.99011	3.16834	21.4625	4.42374	3.84233	1.94198	7.68085	2.94127	IPR000490, IPR017853	GO:0004553, GO:0005975
TraesCS4A02G484800		4A	738886426	738890686												IPR001362, IPR013148, IPR013189, IPR013320, IPR018053, IPR021792, IPR023296	GO:0004553, GO:0004564, GO:0004575, GO:0005975, GO:0016021, GO:0090599
TraesCS4A02G485000		4A	738960730	738964876												IPR001362, IPR013148, IPR013189, IPR013320, IPR023296	GO:0004553, GO:0005975, GO:0031219, GO:0051669, GO:0051670
TraesCS4A02G485400	Sucrose:fructan 6-fructosyltransferase [Source:UniProtKB/TrEMBL;Acc:Q8W431]	4A	739064735	739068557	Ta.2789.1.S1_a_at; Ta.2789.1.S1_at	3433.55	11.7455	552.803	9.11062	12648.3	13.6267	10470.1	13.354	2437.72	11.2513	IPR001362, IPR013148, IPR013189, IPR013320, IPR023296	GO:0004553, GO:0004564, GO:0004575, GO:0005975, GO:0008152, GO:0016020, GO:0016021, GO:0016740, GO:0016787, GO:0016798, GO:0031219, GO:0051669, GO:0051670, GO:0090599
TraesCS4A02G485500		4A	739079337	739081425												IPR001362, IPR013148, IPR013189, IPR013320, IPR023296	GO:0004553, GO:0005975, GO:0031219, GO:0051669, GO:0051670
TraesCS4A02G485600		4A	739129344	739132353												IPR001362, IPR013148, IPR013189, IPR013320, IPR018053, IPR023296	GO:0004553, GO:0005975, GO:0031219, GO:0051669, GO:0051670
TraesCS4A02G485700		4A	739151566	739154805	Ta.9918.1.S1_at	10.4919	3.3912	9.26217	3.21135	5.84249	2.54658	3.93234	1.97539	35.2237	5.13847	IPR001362, IPR013148, IPR013189, IPR013320, IPR018053, IPR023296	GO:0004553, GO:0005975, GO:0031219, GO:0051669, GO:0051670
TraesCS4A02G485800		4A	739272852	739276534												IPR001362, IPR013148, IPR013189, IPR013320, IPR018053, IPR023296	GO:0004553, GO:0004564, GO:0004575, GO:0005975, GO:0031219, GO:0051669, GO:0051670, GO:0090599
TraesCS4A02G485900		4A	739310199	739314035												IPR001362, IPR013148, IPR013189, IPR013320, IPR018053, IPR021792, IPR023296	GO:0004553, GO:0004564, GO:0004575, GO:0005975, GO:0016021, GO:0031219, GO:0051669, GO:0051670, GO:0090599
TraesCS4A02G486000		4A	739415334	739419007	Ta.2788.1.A1_at	1094.66	10.0963	68.9288	6.10703	1352.73	10.4017	1038.57	10.0204	1348.74	10.3974	IPR001362, IPR013148, IPR013189, IPR013320, IPR021792, IPR023296	GO:0004553, GO:0004564, GO:0004575, GO:0005975, GO:0031219, GO:0051669, GO:0051670, GO:0090599
TraesCS6A02G408300	Xyloglucan endotransglucosylase/hydrolase [Source:UniProtKB/TrEMBL;Acc:Q56TP1]	6A	613236641	613238221												IPR000757, IPR008263, IPR008264, IPR010713, IPR013320, IPR016455	GO:0004553, GO:0005576, GO:0005618, GO:0005975, GO:0006073, GO:0008152, GO:0010411, GO:0016740, GO:0016762, GO:0016787, GO:0016798, GO:0042546, GO:0048046, GO:0071555
TraesCS6B02G064700		6B	42810293	42814024												IPR000490, IPR012946, IPR017853	GO:0004553, GO:0005975
TraesCS6D02G392100	Xyloglucan endotransglucosylase/hydrolase [Source:UniProtKB/TrEMBL;Acc:W5GW73]	6D	466907866	466909390												IPR000757, IPR008263, IPR008264, IPR010713, IPR013320, IPR016455	GO:0004553, GO:0005618, GO:0005975, GO:0006073, GO:0010411, GO:0016762, GO:0042546, GO:0048046, GO:0071555
TraesCS7A02G009100		7A	3982822	3986635	Ta.2788.1.A1_at	1094.66	10.0963	68.9288	6.10703	1352.73	10.4017	1038.57	10.0204	1348.74	10.3974	IPR001362, IPR013148, IPR013189, IPR013320, IPR021792, IPR023296	GO:0004553, GO:0004564, GO:0004575, GO:0005773, GO:0005975, GO:0008152, GO:0016020, GO:0016021, GO:0016740, GO:0016787, GO:0016798, GO:0031219, GO:0051669, GO:0051670, GO:0090599
TraesCS7A02G009200		7A	4014507	4017160												IPR001362, IPR013148, IPR013189, IPR013320, IPR021792, IPR023296	GO:0004553, GO:0004564, GO:0004575, GO:0005773, GO:0005975, GO:0008152, GO:0016020, GO:0016021, GO:0016740, GO:0016787, GO:0016798, GO:0031219, GO:0051669, GO:0051670, GO:0090599,
TraesCS7A02G009400		7A	4067455	4072522												IPR001362, IPR013148, IPR013189, IPR013320, IPR018053, IPR023296	GO:0004553, GO:0004564, GO:0004575, GO:0005975, GO:0031219, GO:0051669, GO:0051670, GO:0090599
TraesCS7A02G009500		7A	4206019	4209108												IPR001362, IPR013148, IPR013189, IPR013320, IPR018053, IPR023296	GO:0004553, GO:0004564, GO:0004575, GO:0005975, GO:0031219, GO:0051669, GO:0051670, GO:0090599
TraesCS7A02G009600		7A	4251676	4255084												IPR001362, IPR013148, IPR013189, IPR013320, IPR018053, IPR023296	GO:0004553, GO:0004564, GO:0004575, GO:0005975, GO:0031219, GO:0051669, GO:0051670, GO:0090599
TraesCS7A02G009700		7A	4327689	4330356												IPR001362, IPR013148, IPR013189, IPR013320, IPR018053, IPR023296	GO:0004553, GO:0004564, GO:0004575, GO:0005975, GO:0031219, GO:0051669, GO:0051670, GO:0090599
TraesCS7A02G009800		7A	4429532	4435570	Ta.2789.1.S1_a_at; Ta.2789.2.S1_at; Ta.2789.2.S1_x_at	5610.05	12.4538	914.633	9.83705	22380.8	14.45	16309	13.9934	4664.35	12.1875	IPR001362, IPR013148, IPR013189, IPR013320, IPR023296	GO:0004553, GO:0004564, GO:0004575, GO:0005975, GO:0031219, GO:0051669, GO:0051670, GO:0090599
TraesCS7A02G010200		7A	4625252	4629547	TaAffx.111940.1.S1_s_at	5.81438	2.53962	519.995	9.02236	633.38	9.30693	504.241	8.97797	795.137	9.63506	IPR001362, IPR013148, IPR013189, IPR013320, IPR018053, IPR021792, IPR023296	GO:0004553, GO:0004564, GO:0004575, GO:0005975, GO:0016021, GO:0090599
TraesCS1A02G000900		1A	233818	245051
TraesCS1A02G001000		1A	270605	272936
TraesCS1A02G001100		1A	269472	289602
TraesCS1A02G001200		1A	287697	287957
TraesCS1A02G001300		1A	297266	297652
TraesCS1A02G001400		1A	294611	305428
TraesCS1A02G001500		1A	326099	326518
TraesCS1A02G001600		1A	337960	338256
TraesCS1A02G001700		1A	403455	403751
TraesCS1A02G001800		1A	1144333	1145934	Ta.3590.1.S1_s_at	873.097	9.77	3558.34	11.797	5516.06	12.4294	3546.41	11.7921	2756.8	11.4288	IPR001383, IPR026569, IPR034704, IPR037147	GO:0003735, GO:0005840, GO:0006412
TraesCS1A02G001900		1A	1159194	1162830	Ta.9561.2.S1_a_at	276.023	8.10865	1139.51	10.1542	1290.94	10.3342	1441.25	10.4931	1280.48	10.3225	IPR006785, IPR025655, IPR036388	GO:0005515, GO:0005778, GO:0016021, GO:0016560
TraesCS1A02G002000	E3 ubiquitin-protein ligase SIS3 [Source:Projected from Arabidopsis thaliana (AT3G47990) UniProtKB/Swiss-Prot;Acc:Q8GYT9]	1A	1163485	1167878												IPR001841, IPR013083	GO:0004842, GO:0010182, GO:0016021
TraesCS1A02G002100		1A	1170356	1177383	Ta.8264.1.S1_at	37.2681	5.21987	85.8073	6.42303	50.2481	5.651	77.4539	6.27527	70.666	6.14294
TraesCS1A02G002200		1A	1188844	1190864												IPR012340
TraesCS1A02G002300		1A	1209721	1212812	Ta.22763.1.S1_at; TaAffx.106105.1.S1_at; TaAffx.55494.1.S1_at	93.015	6.53939	612.11	9.25765	958.127	9.90407	792.366	9.63002	799.967	9.6438	IPR040320
TraesCS1A02G002400		1A	1228914	1229339												IPR001128, IPR002401, IPR036396	GO:0005506, GO:0016705, GO:0020037, GO:0055114
TraesCS1A02G002500	Phospholipid-transporting ATPase [Source:UniProtKB/TrEMBL;Acc:A0A1D5S510]	1A	1232354	1238469	Ta.16692.1.A1_x_at	59.0181	5.88309	169.699	7.40683	211.918	7.72736	234.777	7.87515	229.179	7.84033	IPR001757, IPR006539, IPR008250, IPR018303, IPR023214, IPR023298, IPR023299, IPR032630, IPR032631, IPR036412	GO:0000166, GO:0000287, GO:0004012, GO:0005524, GO:0015914, GO:0016021, GO:0030554, GO:0032550, GO:0032559, GO:0140326
TraesCS1A02G002700		1A	1336841	1348326	Ta.10801.1.A1_at; Ta.19642.1.A1_a_at	79.9478	6.32099	678.131	9.40542	791.719	9.62884	648.008	9.33987	616.284	9.26745	IPR003822, IPR013194, IPR031693, IPR036600, IPR039774	GO:0003714, GO:0005634, GO:0006355
TraesCS1A02G002800		1A	1565963	1567220												IPR002562, IPR012337, IPR036397	GO:0003676, GO:0006139, GO:0008408
TraesCS1A02G002900		1A	1657115	1666923												IPR000719, IPR008271, IPR011009, IPR017441	GO:0004672, GO:0004674, GO:0005524, GO:0006468, GO:0030554, GO:0032550, GO:0032559, GO:0097367
TraesCS1A02G003000		1A	1668949	1670358												IPR032675	GO:0030554, GO:0032550, GO:0032559, GO:0043531,
TraesCS1A02G003100		1A	1689351	1698842												IPR002182, IPR027417, IPR032675, IPR038005, IPR041118	GO:0030554, GO:0032550, GO:0032559, GO:0043531
TraesCS1A02G003200		1A	1721421	1734947												IPR008803, IPR027417, IPR030386	GO:0005525, GO:0032550
TraesCS1A02G003300		1A	1792119	1815634												IPR008803
TraesCS1A02G003400		1A	2161814	2163439												IPR003480, IPR023213	GO:0016747
TraesCS1A02G003500		1A	2184957	2185397
TraesCS1A02G003546		1A	2200978	2203830												IPR002182, IPR027417	GO:0043531
TraesCS1A02G036900		1A	20842533	20842862	TaAffx.23056.1.S1_at	7.155	2.83895	41.5211	5.37577	41.4837	5.37447	16.7783	4.06852	18.6507	4.22116
TraesCS1A02G037000		1A	20865534	20867378
TraesCS1A02G037100		1A	20872419	20873501												IPR001810, IPR017451, IPR036047	GO:0005515
TraesCS1A02G037200		1A	20879444	20880129												IPR008390	GO:0015081,
TraesCS1A02G037300		1A	20888601	20889881	TaAffx.71991.1.S1_at	52.3725	5.71074	204.169	7.67362	196.472	7.61818	71.3315	6.15647	107.487	6.74802	IPR001938, IPR037176
TraesCS1A02G037400		1A	20893785	20898393												IPR014729, IPR006153, IPR038770	GO:0006812, GO:0015081, GO:0015299, GO:0016021, GO:0055085,
TraesCS1A02G037500		1A	20913437	20914089
TraesCS1A02G037600	3-ketoacyl-CoA synthase [Source:UniProtKB/TrEMBL;Acc:A0A341NR51]	1A	20917920	20919534												IPR012392, IPR013601, IPR013747, IPR016039	GO:0003824, GO:0006633, GO:0016020, GO:0016747
TraesCS1A02G037700	Phenylalanine ammonia-lyase [Source:UniProtKB/TrEMBL;Acc:A0A1D5S0U3]	1A	20924887	20932614												IPR001106, IPR005922, IPR008948, IPR022313, IPR023144, IPR024083	GO:0003824, GO:0005737, GO:0006559, GO:0009800, GO:0016841, GO:0045548
TraesCS1A02G037800	Phenylalanine ammonia-lyase [Source:UniProtKB/TrEMBL;Acc:W4ZZ52]	1A	20935423	20938081												IPR001106, IPR005922, IPR008948, IPR022313, IPR023144, IPR024083	GO:0003824, GO:0005737, GO:0006559, GO:0009800, GO:0016841, GO:0045548
TraesCS1A02G037900		1A	20977276	20980680	Ta.12724.3.S1_s_at	218.39	7.77076	2616.02	11.3532	2093.8	11.0319	1725.69	10.753	1727.32	10.7543
TraesCS1A02G038000		1A	20989266	20991207
TraesCS1A02G038100	Histone H2A [Source:UniProtKB/TrEMBL;Acc:W4ZWK0]	1A	20998069	20998918	Ta.27657.9.S1_at; Ta.27657.9.S1_x_at	53.0016	5.72796	105.624	6.72279	59.4229	5.89295	98.8916	6.62778	93.5074	6.54701	IPR002119, IPR007125, IPR009072, IPR032454, IPR032458	GO:0000786, GO:0000790, GO:0003677, GO:0005634, GO:0005694, GO:0006325, GO:0006342, GO:0046982
TraesCS1A02G038200	Histone H2A [Source:UniProtKB/TrEMBL;Acc:W4ZYU1]	1A	21022731	21023627	Ta.27657.5.S1_at; Ta.27657.5.S1_x_at	109.851	6.7794	156.295	7.28813	108.344	6.75947	73.4034	6.19777	91.9535	6.52283	IPR002119, IPR007125, IPR009072, IPR032454, IPR032458	GO:0000786, GO:0000790, GO:0003677, GO:0005634, GO:0005694, GO:0006325, GO:0006342, GO:0046982
TraesCS1A02G038300	PPa4 [Source:Projected from Arabidopsis thaliana (AT3G53620) UniProtKB/TrEMBL;Acc:A0A178VKC0]	1A	21024515	21026280	Ta.14539.1.S1_at	88.1269	6.46151	285.719	8.15845	267.192	8.06173	409.454	8.67756	187.921	7.55398	IPR008162, IPR036649	GO:0000287, GO:0004427, GO:0005737, GO:0006796
TraesCS1A02G038400	Poly [ADP-ribose] polymerase [Source:UniProtKB/TrEMBL;Acc:A0A341NGZ9]	1A	21034869	21049127												IPR001357, IPR001510, IPR004102, IPR008288, IPR008893, IPR012317, IPR012982, IPR036420, IPR036616, IPR036930, IPR036957, IPR038650	GO:0003677, GO:0003950, GO:0005634, GO:0006471, GO:0008270, GO:0051287
TraesCS1A02G038500		1A	21065629	21067678												IPR038765
TraesCS1A02G038600		1A	21075169	21080368												IPR032675	GO:0030554, GO:0032550, GO:0032559,
TraesCS1A02G038800		1A	21085585	21085875
TraesCS1A02G038828		1A	21105738	21109546
TraesCS1A02G039000		1A	21278609	21279405
TraesCS1A02G039100		1A	21281532	21285458	TaAffx.79090.1.S1_at	37.3125	5.22159	51.8077	5.6951	14.6435	3.87219	46.5423	5.54047	46.3129	5.53334	IPR003340, IPR015300,	GO:0003677, GO:0005634, GO:0006351, GO:0006355,
TraesCS1A02G039200		1A	21322246	21335307	TaAffx.59305.1.S1_at; TaAffx.9320.1.S1_at	105.977	6.72761	458.648	8.84124	383.547	8.58326	362.155	8.50046	330.599	8.36894	IPR036890, IPR041006	GO:0030554, GO:0032550, GO:0032559, GO:0097367,
TraesCS1A02G039300	Type I inositol polyphosphate 5-phosphatase 8 [Source:Projected from Arabidopsis thaliana (AT2G37440) UniProtKB/Swiss-Prot;Acc:Q0WT19]	1A	21400354	21406196												IPR000300, IPR005135, IPR036691	GO:0016787, GO:0046856
TraesCS1A02G039400		1A	21618184	21626991												IPR007205, IPR011989, IPR016024, IPR039717
TraesCS1A02G039600		1A	21714451	21714793
TraesCS1A02G039700		1A	21829731	21832587												IPR003439, IPR003593, IPR011527, IPR017871, IPR027417, IPR036640	GO:0005524, GO:0016021, GO:0016887, GO:0030554, GO:0032550, GO:0032559, GO:0042626, GO:0055085
TraesCS1A02G039800	3-ketoacyl-CoA synthase [Source:UniProtKB/TrEMBL;Acc:A0A1D5S3Z4]	1A	21985330	21987056												IPR012392, IPR013601, IPR013747, IPR016039	GO:0003824, GO:0006633, GO:0016020, GO:0016747
TraesCS1A02G039900		1A	22038188	22047331												IPR007658, IPR025315
TraesCS1A02G040000		1A	22055422	22056147
TraesCS1A02G040100		1A	22074137	22076882												IPR013087, IPR036236	GO:0003676
TraesCS1A02G040200		1A	22271358	22271960												IPR013087, IPR036236	GO:0003676
TraesCS1A02G040300		1A	22282323	22283710	Ta.1897.1.S1_x_at	16.0963	4.00865	34.6171	5.11341	20.9399	4.38818	34.391	5.10396	25.5139	4.67321	IPR013087, IPR036236	GO:0003676
TraesCS1A02G040400	PHIP1 [Source:Projected from Arabidopsis thaliana (AT3G55340) UniProtKB/TrEMBL;Acc:A0A384KSV0]	1A	22287727	22291553	Ta.16984.1.A1_at	54.24	5.76129	132.751	7.05257	232.114	7.85869	475.552	8.89346	402.54	8.65299	IPR000504, IPR001878, IPR012677, IPR034361, IPR034362, IPR035979, IPR036875	GO:0003676, GO:0008270
TraesCS1A02G040500		1A	22291726	22293776	Ta.9689.1.S1_at	76.745	6.262	240.257	7.90843	321.953	8.33071	453.965	8.82644	327.45	8.35513
TraesCS1A02G040600	Glucose-6-phosphate isomerase [Source:UniProtKB/TrEMBL;Acc:A0A1D5S2P8]	1A	22294835	22301515	Ta.894.1.S1_at; Ta.894.1.S1_x_at	766.093	9.58138	11044.8	13.4311	8850.6	13.1116	8550.43	13.0618	9975.88	13.2842	IPR001672, IPR018189, IPR023096, IPR035476, IPR035482	GO:0004347, GO:0006094, GO:0006096, GO:0016853
TraesCS1A02G040700		1A	22329072	22332422												IPR027417, IPR032675, IPR038005, IPR041118	GO:0005515, GO:0005524, GO:0006915, GO:0006952, GO:0030554, GO:0032550, GO:0032559, GO:0043531, GO:0097367,
TraesCS1A02G040800		1A	22342219	22342440
TraesCS1A02G040900	3-ketoacyl-CoA synthase [Source:UniProtKB/TrEMBL;Acc:A0A1D5S1D6]	1A	22534635	22536459												IPR012392, IPR013601, IPR013747, IPR016039	GO:0003824, GO:0006633, GO:0016020, GO:0016021, GO:0016747
TraesCS1A02G041000		1A	22561344	22561535
TraesCS1A02G041100		1A	22612227	22614080												IPR002182, IPR027417, IPR032675	GO:0030554, GO:0032550, GO:0032559, GO:0043531
TraesCS1A02G151300		1A	259892863	259893126
TraesCS1A02G151400	Cyclin-dependent kinase inhibitor [Source:UniProtKB/TrEMBL;Acc:W4ZSJ3]	1A	259994475	259997900												IPR003175	GO:0004857, GO:0004861, GO:0005634, GO:0007050
TraesCS1A02G151500	Tyrosine--tRNA ligase [Source:UniProtKB/TrEMBL;Acc:A0A341NJD8]	1A	260834119	260835657	Ta.5195.1.S1_at; Ta.5195.2.A1_s_at	108.121	6.75651	231.333	7.85383	228.464	7.83582	205.362	7.68202	158.8	7.31107	IPR001412, IPR002305, IPR002307, IPR002942, IPR014729, IPR024088, IPR024107, IPR036986	GO:0000166, GO:0001883, GO:0003723, GO:0004812, GO:0004831, GO:0005524, GO:0006418, GO:0006437, GO:0030554, GO:0032550, GO:0032559, GO:0097367
TraesCS1A02G151600		1A	260836561	260840054	Ta.1184.1.A1_at	58.6925	5.8751	20.4046	4.35083	92.1789	6.52636	102.756	6.68309	102.289	6.67651	IPR008580, IPR042266
TraesCS1A02G151700		1A	260840507	260841094
TraesCS1A02G151900		1A	260842565	260842903												IPR002156, IPR012337, IPR036397	GO:0003676, GO:0004523
TraesCS1A02G152000		1A	261130527	261136858	Ta.28840.1.S1_at; Ta.28840.2.S1_s_at	24.9272	4.63965	296.841	8.21355	253.812	7.98762	277.938	8.11862	263.07	8.0393	IPR001680, IPR015943, IPR017986, IPR019775, IPR024977, IPR036322	GO:0005515
TraesCS1A02G152100	3-ketoacyl-CoA synthase [Source:UniProtKB/TrEMBL;Acc:A0A1D5RYU5]	1A	261247064	261250437												IPR012392, IPR013601, IPR013747, IPR016039	GO:0003824, GO:0006633, GO:0016020, GO:0016747
TraesCS1A02G154900	Transcriptional regulator, Regulator of meristem activity, Regulation of inflorescence developmen [Source: Projected from Oryza sativa (Os10g0478000)]	1A	271619747	271621923												IPR006936, IPR040222
TraesCS1A02G155000		1A	271882592	271891529												IPR021788	GO:0016021
TraesCS1A02G155300		1A	272983850	272985600												IPR001005, IPR009057, IPR017930	GO:0003677
TraesCS1A02G155500		1A	274108134	274109975	TaAffx.38009.1.A1_at	131.401	7.03784	828.44	9.69425	933.258	9.86613	936.666	9.87139	893.314	9.80302		GO:0015081, GO:0016021
TraesCS1A02G155600		1A	274781284	274782385
TraesCS1A02G155700		1A	275764472	275764765
TraesCS1A02G157500		1A	279732251	279742732	Ta.25805.1.A1_at	97.4219	6.60617	1262.79	10.3024	667.271	9.38213	1060.51	10.0505	633.362	9.30689	IPR001356, IPR002913, IPR009057, IPR013978, IPR023393	GO:0003677, GO:0005634, GO:0008289
TraesCS1A02G157600		1A	279824794	279831261												IPR022059
TraesCS1A02G157700	Double-stranded RNA-binding protein 2 [Source:Projected from Arabidopsis thaliana (AT2G28380) UniProtKB/Swiss-Prot;Acc:Q9SKN2]	1A	279903221	279908684	Ta.9386.1.S1_at	129.897	7.02122	538.524	9.07287	490.858	8.93916	926.596	9.8558	575.855	9.16956	IPR014720,	GO:0003723, GO:0003725, GO:0005737, GO:0035196, GO:0070919,
TraesCS1A02G157800		1A	280274430	280276096												IPR021825
TraesCS1A02G157900		1A	280602664	280604294												IPR007608
TraesCS1A02G165700		1A	298557743	298566718	Ta.3788.1.A1_at	4726.61	12.2066	85746.2	16.3878	61672.8	15.9123	20665.3	14.3349	22561.2	14.4616	IPR031610	GO:0009507
TraesCS1A02G165800	Protein TIC110, chloroplastic [Source:Projected from Arabidopsis thaliana (AT1G06950) UniProtKB/Swiss-Prot;Acc:Q8LPR9]	1A	298601923	298610934	Ta.12508.1.S1_at	753.314	9.55711	2842.3	11.4728	3326.07	11.6996	2797.62	11.45	2157.59	11.0752	IPR031610	GO:0009507
TraesCS1A02G165900		1A	298613622	298615547	Ta.22813.1.S1_at	29.715	4.89312	386.562	8.59456	447.43	8.80552	299.716	8.22745	382.278	8.57848	IPR000467, IPR039146	GO:0003676
TraesCS1A02G166000		1A	298621356	298621852												IPR000626, IPR002906, IPR011332, IPR019954, IPR019956, IPR029071, IPR038582	GO:0003735, GO:0005515, GO:0005634, GO:0005737, GO:0005840, GO:0006412, GO:0016567, GO:0019941, GO:0031386, GO:0031625, GO:0046872
TraesCS1A02G166100		1A	298635520	298636647	Ta.192.1.S1_at	645.422	9.3341	2124.44	11.0529	2690.98	11.3939	3512.74	11.7784	5688.98	12.474	IPR007541
TraesCS1A02G166200		1A	298646085	298646780	TaAffx.108363.1.S1_at	36.8794	5.20474	28.7315	4.84456	28.6139	4.83865	30.9766	4.95311	32.7756	5.03455	IPR007541
TraesCS1A02G166300		1A	298725244	298725951												IPR007541
TraesCS1A02G166400		1A	299103405	299106055												IPR002182, IPR027417	GO:0030554, GO:0032550, GO:0032559, GO:0043531
TraesCS1A02G166500		1A	299267975	299268403												IPR000823, IPR002016, IPR010255	GO:0004601, GO:0006979, GO:0020037, GO:0055114
TraesCS1A02G166600		1A	299424945	299426015	Ta.231.1.S1_at; Ta.231.1.S1_x_at	52.7725	5.72171	337.802	8.40003	166.135	7.37621	493.307	8.94634	749.398	9.54959	IPR007541
TraesCS1A02G166800		1A	299543000	299543506
TraesCS1A02G166900		1A	299624485	299657841												IPR000048, IPR001609, IPR002710, IPR004009, IPR027417, IPR036018, IPR036961, IPR037975	GO:0003774, GO:0003779, GO:0005515, GO:0005524, GO:0007015, GO:0016459, GO:0030554, GO:0032550, GO:0032559
TraesCS1A02G167000		1A	299719197	299719790												IPR036908, IPR039271
TraesCS1A02G167100		1A	300003984	300004745	TaAffx.105935.1.S1_at; TaAffx.105935.2.S1_at; TaAffx.105935.2.S1_s_at	73.1544	6.19287	152.721	7.25476	310.271	8.27738	971.065	9.92342	603.765	9.23784	IPR004864
TraesCS1A02G167200		1A	300100764	300102768	Ta.5296.1.S1_at; Ta.5296.1.S1_s_at	570.075	9.15501	2406.75	11.2329	2908.94	11.5063	3382.45	11.7239	2739.76	11.4198	IPR018450	GO:0004351, GO:0005829, GO:0006538, GO:0016020, GO:0016021
TraesCS1A02G167300		1A	300105516	300106916												IPR010733
TraesCS1A02G167400		1A	300107115	300111644	Ta.5465.1.A1_at; TaAffx.37442.1.S1_at	40.6794	5.34623	103.689	6.69612	156.305	7.28822	184.498	7.52746	189.28	7.56437	IPR014939, IPR036390
TraesCS1A02G167500		1A	300116122	300116981												IPR036908, IPR039271
TraesCS1A02G174100		1A	311059509	311060627												IPR005174
TraesCS1A02G174200		1A	311525112	311526359												IPR005162
TraesCS1A02G174300		1A	311771378	311771641
TraesCS1A02G174400		1A	311806706	311808758												IPR004328, IPR038499
TraesCS1A02G174500		1A	311812456	311816565	TaAffx.105894.1.S1_at; TaAffx.455.1.A1_at	53.2541	5.73482	101.633	6.66722	166.917	7.38299	145.804	7.18789	122.481	6.93642	IPR000301, IPR018499	GO:0016021
TraesCS1A02G174600		1A	311846860	311852943	Ta.7626.1.A1_at	397.816	8.63596	1802.58	10.8158	1717.23	10.7459	1932.32	10.9161	1842.28	10.8473	IPR000629, IPR001650, IPR011545, IPR014001, IPR014014, IPR027417	GO:0003676, GO:0005524
TraesCS1A02G174700		1A	312159893	312161436	Ta.5437.1.S1_at; Ta.5437.3.S1_a_at	520.759	9.02447	5718.73	12.4815	5955.96	12.5401	3873.75	11.9195	3267.99	11.6742	IPR005516, IPR005518
TraesCS1A02G174800		1A	312583634	312585896
TraesCS1A02G174900		1A	312584969	312607067												IPR006593, IPR043205	GO:0016491
TraesCS1A02G175000		1A	312772250	312777623												IPR019448
TraesCS1A02G175200		1A	313161460	313162228	Ta.24660.1.S1_at; TaAffx.97181.1.S1_s_at	723.901	9.49965	3910.63	11.9332	4529.48	12.1451	2097.59	11.0345	1093.66	10.095	IPR016140, IPR033872, IPR036312	GO:0006869
TraesCS1A02G175300		1A	313478337	313478911
TraesCS1A02G175500		1A	313489231	313491849	Ta.8085.1.S1_at	73.9894	6.20925	266.551	8.05827	285.12	8.15543	266.834	8.0598	431.244	8.75236	IPR037491	GO:0009737
TraesCS1A02G175600		1A	313590610	313592112												IPR002885, IPR011990	GO:0005515
TraesCS1A02G175700		1A	313738701	313751739												IPR000535, IPR001214, IPR008962, IPR011990, IPR013026, IPR013783, IPR019734	GO:0005515
TraesCS1A02G175800		1A	313744357	313748524	TaAffx.109999.1.S1_at	17.2969	4.11244	159.803	7.32015	108.746	6.76482	126.343	6.9812	121.463	6.92437
TraesCS1A02G200400		1A	360455273	360459181												IPR018487, IPR036375	GO:0046872
TraesCS1A02G200500		1A	361173339	361174748												IPR003340, IPR015300	GO:0003677
TraesCS1A02G200600		1A	361185339	361193778
TraesCS1A02G200700		1A	361235402	361236546												IPR006121, IPR036163	GO:0030001, GO:0046872
TraesCS1A02G200800		1A	361352160	361359053	Ta.22780.1.A1_at; TaAffx.115796.1.S1_at; TaAffx.15304.1.S1_at	260.348	8.0243	1616.23	10.6584	1533.44	10.5826	1498.75	10.5495	1662.51	10.6992	IPR009457, IPR040226	GO:0016021
TraesCS1A02G200900		1A	361509862	361517115	Ta.6854.1.S1_at; TaAffx.28003.1.S1_at	26.9625	4.75288	130.306	7.02576	90.4352	6.49881	127.832	6.99811	114.712	6.84187	IPR027417, IPR041677, IPR041679
TraesCS1A02G201000		1A	362059732	362063167												IPR022059
TraesCS1A02G315800		1A	507959475	507960056
TraesCS1A02G315900		1A	508133863	508153676	Ta.7253.1.A1_at; Ta.7253.2.S1_at	28.1272	4.81389	223.185	7.80209	182.176	7.50919	331.719	8.37382	320.216	8.3229	IPR000432, IPR007696, IPR011184, IPR027417, IPR036187	GO:0005524, GO:0006298, GO:0030554, GO:0030983, GO:0032550, GO:0032559, GO:0097367
TraesCS1A02G316100		1A	508190503	508201772	TaAffx.134008.1.S1_at	58.1362	5.86137	126.253	6.98017	182.196	7.50934	149.416	7.22319	177.145	7.46879
TraesCS1A02G316200		1A	508214411	508214940												IPR039391	GO:0009055
TraesCS1A02G316300		1A	508273915	508274382												IPR003245, IPR008972, IPR028871, IPR039391	GO:0009055
TraesCS1A02G316400		1A	508281269	508281631												IPR003245, IPR008972, IPR039391	GO:0009055
TraesCS1A02G316500		1A	508286406	508286828
TraesCS1A02G316600		1A	508309166	508309528												IPR003245, IPR008972, IPR039391	GO:0009055
TraesCS1A02G316700		1A	508332796	508335160												IPR003245, IPR008972, IPR039391	GO:0009055
TraesCS1A02G316800		1A	508340376	508340738												IPR003245, IPR008972, IPR039391	GO:0009055
TraesCS1A02G316900		1A	508526216	508528106	Ta.4601.1.S1_s_at	1792.56	10.8078	16981.5	14.0517	18799.2	14.1984	11545.9	13.4951	12651.5	13.627	IPR001950, IPR005874, IPR036877	GO:0003723, GO:0003743, GO:0006413
TraesCS1A02G317000		1A	508554720	508558232	TaAffx.128847.1.S1_at	41.5481	5.37671	218.419	7.77095	313.777	8.2936	387.965	8.59978	248.975	7.95986	IPR043424
TraesCS1A02G317100	Histone deacetylase [Source:UniProtKB/TrEMBL;Acc:A0A341NRT9]	1A	508627551	508633273												IPR000286, IPR023696, IPR023801, IPR037138
TraesCS1A02G317200	B2 protein [Source:UniProtKB/TrEMBL;Acc:W4ZN93]	1A	508640643	508644166	Ta.14.1.S1_at	2075.68	11.0194	7486.94	12.8702	7271.46	12.828	7170.28	12.8078	6606.38	12.6896	IPR013989
TraesCS1A02G317300		1A	508720828	508723614												IPR000719, IPR001245, IPR008271, IPR011009, IPR017441	GO:0000166, GO:0004672, GO:0004674, GO:0005524, GO:0006468, GO:0016301, GO:0016310, GO:0016740, GO:0030554, GO:0032550, GO:0032559, GO:0097367
TraesCS1A02G317400		1A	508838446	508839654
TraesCS1A02G317700		1A	508962029	508962310
TraesCS1A02G317800		1A	509012804	509016623												IPR000719, IPR001611, IPR003591, IPR008271, IPR011009, IPR013210, IPR017441, IPR032675	GO:001707, GO:0000166, GO:0001882, GO:0001883, GO:0004672, GO:0005515, GO:0005524, GO:0006468, GO:0016020, GO:0016021, GO:0016301, GO:0016310, GO:0016740, GO:0030554, GO:0032550, GO:0032553, GO:0032555, GO:0032559, GO:0097367
TraesCS1A02G317900	Peroxidase [Source:UniProtKB/TrEMBL;Acc:A0A341NSU5]	1A	509036504	509038028	Ta.9288.1.S1_x_at; Ta.9288.3.S1_x_at; TaAffx.86697.1.S1_x_at	84.0323	6.39287	20.7579	4.37559	25.0859	4.6488	6.92681	2.79219	5.32059	2.41159	IPR000823, IPR002016, IPR010255, IPR019793, IPR019794, IPR033905	GO:0004601, GO:0006979, GO:0020037, GO:0042744, GO:0055114
TraesCS1A02G318000	Peroxidase [Source:UniProtKB/TrEMBL;Acc:A0A341NQW7]	1A	509492227	509493689	Ta.14580.3.S1_x_at	4.96687	2.31234	3.1729	1.6658	28.6706	4.8415	16.8939	4.07843	20.4171	4.35171	IPR000823, IPR002016, IPR010255, IPR019793, IPR019794, IPR033905	GO:0004601, GO:0005576, GO:0006979, GO:0016491, GO:0020037, GO:0042744, GO:0046872, GO:0055114, GO:0098869
TraesCS1A02G318100		1A	509541578	509541892												IPR000823, IPR002016, IPR010255	GO:0004601, GO:0006979, GO:0020037, GO:0055114
TraesCS1A02G318200	Peroxidase [Source:UniProtKB/TrEMBL;Acc:A0A341NQ29]	1A	509702182	509703602	Ta.14580.3.S1_x_at	4.96687	2.31234	3.1729	1.6658	28.6706	4.8415	16.8939	4.07843	20.4171	4.35171	IPR000823, IPR002016, IPR010255, IPR019793, IPR019794, IPR033905	GO:0004601, GO:0006979, GO:0020037, GO:0042744, GO:0055114
TraesCS1A02G318300	Peroxidase [Source:UniProtKB/TrEMBL;Acc:A0A341P1K1]	1A	509718505	509719990												IPR000823, IPR002016, IPR010255, IPR019793, IPR019794, IPR033905	GO:0004601, GO:0006979, GO:0020037, GO:0042744, GO:0055114
TraesCS1A02G318400	Peroxidase [Source:UniProtKB/TrEMBL;Acc:A0A341NSV0]	1A	509775402	509776820	Ta.14580.3.S1_x_at	4.96687	2.31234	3.1729	1.6658	28.6706	4.8415	16.8939	4.07843	20.4171	4.35171	IPR000823, IPR002016, IPR010255, IPR019793, IPR019794, IPR033905	GO:0004601, GO:0006979, GO:0020037, GO:0042744, GO:0055114
TraesCS1A02G318500	Peroxidase [Source:UniProtKB/TrEMBL;Acc:A0A1D5S0G0]	1A	509791918	509793363	Ta.14580.3.S1_x_at	4.96687	2.31234	3.1729	1.6658	28.6706	4.8415	16.8939	4.07843	20.4171	4.35171	IPR000823, IPR002016, IPR010255, IPR019793, IPR019794, IPR033905	GO:0004601, GO:0005576, GO:0006979, GO:0020037, GO:0042744, GO:0046872, GO:0055114
TraesCS1A02G318600	Peroxidase [Source:UniProtKB/TrEMBL;Acc:A0A341NQ35]	1A	509848073	509849504												IPR000823, IPR002016, IPR010255, IPR019793, IPR019794, IPR033905	GO:0004601, GO:0006979, GO:0020037, GO:0042744, GO:0055114
TraesCS1A02G318700	Peroxidase [Source:UniProtKB/TrEMBL;Acc:A0A1D5RQ45]	1A	509913455	509914868												IPR000823, IPR002016, IPR010255, IPR019793, IPR019794, IPR033905	GO:0004601, GO:0005576, GO:0006979, GO:0020037, GO:0042744, GO:0046872, GO:0055114
TraesCS1A02G318800		1A	510111616	510111930												IPR000823, IPR002016, IPR010255	GO:0004601, GO:0006979, GO:0020037, GO:0055114
TraesCS1A02G318900	Peroxidase [Source:UniProtKB/TrEMBL;Acc:A0A341NQX7]	1A	510185098	510186531	Ta.14580.1.S1_at	7.18625	2.84524	5.67312	2.50414	12.3985	3.63209	3.65074	1.86819	4.00467	2.00168	IPR000823, IPR002016, IPR010255, IPR019793, IPR019794, IPR033905	GO:0004601, GO:0006979, GO:0020037, GO:0042744, GO:0055114
TraesCS1A02G319000	Peroxidase [Source:UniProtKB/TrEMBL;Acc:A0A341NRV8]	1A	510280764	510282530	TaAffx.44222.1.A1_at	72.3988	6.17789	74.4141	6.2175	144.154	7.17147	275.629	8.10658	73.989	6.20924	IPR000823, IPR002016, IPR010255, IPR033905	GO:0004601, GO:0006979, GO:0020037, GO:0042744, GO:0055114
TraesCS1A02G319100		1A	510282724	510286786	Ta.13997.1.S1_at	128.731	7.00822	737.392	9.52629	890.973	9.79924	1054.57	10.0424	1018.91	9.99281	IPR002816	GO:0016021
TraesCS1A02G319200		1A	510341638	510343306												IPR002213, IPR035595	GO:0016758
TraesCS1A02G319300	Glycosyltransferase [Source:UniProtKB/TrEMBL;Acc:A0A1D5RU42]	1A	510352871	510354295												IPR002213, IPR035595	GO:0016758
TraesCS1A02G319400		1A	510366392	510367420	Ta.23985.1.A1_s_at	208.287	7.70243	1212.13	10.2433	1332.75	10.3802	1189.74	10.2164	706.767	9.46509	IPR018962
TraesCS1A02G319500		1A	510373312	510373620	Ta.13684.1.S1_at	271.592	8.0853	1106.64	10.112	1032.41	10.0118	956.404	9.90148	1025.08	10.0015		GO:0009941
TraesCS1A02G319600	21.7 kDa class VI heat shock protein [Source:Projected from Arabidopsis thaliana (AT5G54660) UniProtKB/Swiss-Prot;Acc:Q9FIT9]	1A	510378418	510380090	TaAffx.107130.1.S1_at	221.653	7.79216	778.856	9.60521	399.667	8.64265	148.605	7.21534	402.096	8.6514	IPR002068, IPR008978
TraesCS1A02G319700		1A	510446253	510448019												IPR005202
TraesCS1A02G319800		1A	510450437	510451177												IPR013216, IPR029063	GO:0008168, GO:0016021
TraesCS1A02G319900		1A	510457220	510457634												IPR036574
TraesCS1A02G320000		1A	510672254	510674036												IPR005123, IPR026992, IPR027443	GO:0016491, GO:0046872, GO:0055114
TraesCS1A02G320100		1A	510803180	510804875												IPR005123, IPR026992, IPR027443	GO:0016491, GO:0046872, GO:0055114
TraesCS1A02G320200		1A	510828730	510831282	TaAffx.105867.1.S1_at	44.2463	5.46748	168.423	7.39595	141.295	7.14257	93.2571	6.54314	109.06	6.76898	IPR004993
TraesCS1A02G320300		1A	511005281	511007520												IPR011598, IPR036638,	GO:0046983,
TraesCS1A02G320400	Potassium transporter [Source:UniProtKB/TrEMBL;Acc:A0A341P1M7]	1A	511009417	511015060												IPR003855	GO:0015079, GO:0016020, GO:0071805
TraesCS1A02G320500		1A	511099314	511102961	Ta.14435.1.S1_at	1511.6	10.5619	9496.72	13.2132	9229.1	13.172	7723.58	12.9151	5468.41	12.4169	IPR005025, IPR008254, IPR010089, IPR029039	GO:0003955, GO:0010181, GO:0016491, GO:0097367
TraesCS1A02G320600		1A	511145933	511146886												IPR000812, IPR013137, IPR013150, IPR013763, IPR023486, IPR036915	GO:0006355, GO:0017025, GO:0046872, GO:0070897
TraesCS1A02G320700		1A	511157996	511158948												IPR000812, IPR013137, IPR013150, IPR013763, IPR023486, IPR036915	GO:0006355, GO:0017025, GO:0070897
TraesCS1A02G320800		1A	511275914	511277018												IPR000812, IPR013137, IPR013150, IPR013763, IPR023486, IPR036915	GO:0006355, GO:0017025, GO:0070897
TraesCS1A02G320900	Serine/threonine-protein kinase [Source:UniProtKB/TrEMBL;Acc:A0A1D5S014]	1A	511404376	511411090												IPR000719, IPR000742, IPR000858, IPR001245, IPR001480, IPR003609, IPR008271, IPR011009, IPR024171, IPR036426	GO:0004672, GO:0004674, GO:0005524, GO:0006468, GO:0016021, GO:0030554, GO:0032550, GO:0032559, GO:0048544
TraesCS1A02G321000		1A	511481306	511484164												IPR006015, IPR006016, IPR014729
TraesCS1A02G321100		1A	511499769	511502581												IPR001087, IPR035669, IPR036514	GO:0016788
TraesCS1A02G321200		1A	511620415	511620816												IPR006969
TraesCS1A02G321400		1A	511635056	511636136												IPR040356	GO:0003700
TraesCS1A02G321500		1A	512039050	512040249												IPR040356	GO:0003700
TraesCS1A02G325600	Thioredoxin [Source:UniProtKB/TrEMBL;Acc:Q7FT21]	1A	516430393	516432298	Ta.30730.1.S1_at	2087.11	11.0273	14955.4	13.8684	15921.5	13.9587	9975.63	13.2842	10185.1	13.3142	IPR013766, IPR017937, IPR036249	GO:0005623, GO:0006662, GO:0015035, GO:0045454
TraesCS1A02G325700		1A	516454500	516454949	TaAffx.87283.1.S1_at	11.8994	3.57281	50.0724	5.64594	58.1246	5.86108	20.4212	4.352	14.6493	3.87276
TraesCS1A02G325800		1A	516558476	516562933	TaAffx.80676.1.S1_at	29.5675	4.88594	54.9619	5.78036	78.3853	6.29251	46.3636	5.53492	46.3568	5.53471	IPR010488, IPR027417	GO:0005524, GO:0016301, GO:0030554, GO:0032550, GO:0032559
TraesCS1A02G325900		1A	516563565	516574801												IPR002083, IPR008974	GO:0005515
TraesCS1A02G326000		1A	516578403	516581691												IPR007658, IPR025315	GO:0016021
TraesCS1A02G326100		1A	516586125	516587361												IPR009806	GO:0009507, GO:0009523, GO:0015979
TraesCS1A02G326200		1A	516623211	516627639	TaAffx.100504.1.S1_at	23.1506	4.53298	96.2801	6.58917	123.989	6.95407	118.128	6.88421	114.63	6.84084	IPR010719, IPR029063
TraesCS1A02G326300		1A	516652174	516653039												IPR024752
TraesCS1A02G326400		1A	516692244	516693100												IPR009806	GO:0009507, GO:0009523, GO:0015979, GO:0016021
TraesCS1A02G326500		1A	516701939	516714843												IPR010719, IPR029063
TraesCS1A02G326600		1A	516726322	516727346												IPR001002, IPR018371, IPR036861	GO:0008061, GO:0097367
TraesCS1A02G326700		1A	516732337	516733111												IPR013320, IPR014895
TraesCS1A02G326800	Agglutinin isolectin 1 [Source:UniProtKB/Swiss-Prot;Acc:P10968]	1A	516739314	516740335												IPR001002, IPR018371, IPR036861	GO:0008061, GO:0030246
TraesCS1A02G326900		1A	516769240	516773351	Ta.2629.1.S1_a_at; Ta.2629.3.S1_a_at	472.573	8.88439	3058.16	11.5784	2435.96	11.2503	2539.99	11.3106	2251.58	11.1367	IPR002023, IPR036249, IPR041921, IPR042128	GO:0016491, GO:0046872, GO:0051537, GO:0055114
TraesCS1A02G327000		1A	516774041	516780152	Ta.7563.1.A1_at; Ta.7563.2.S1_at	31.2916	4.9677	65.3777	6.03073	134.58	7.07232	98.1398	6.61677	76.8585	6.26413	IPR001656, IPR011760, IPR020103, IPR020119, IPR042214	GO:0001522, GO:0003723, GO:0009451, GO:0009982
TraesCS1A02G327100		1A	516780762	516783619	TaAffx.113974.1.S1_at	11.8169	3.56278	58.8475	5.87891	63.4434	5.9874	57.885	5.85512	63.216	5.98222	IPR005172, IPR033467
TraesCS1A02G327200	Signal recognition particle 54 kDa protein [Source:UniProtKB/TrEMBL;Acc:W4ZSW5]	1A	516786135	516789953	TaAffx.24690.1.S1_s_at	88.465	6.46703	53.8666	5.75132	41.2	5.36457	39.1314	5.29025	44.943	5.49002	IPR000897, IPR003593, IPR004125, IPR006325, IPR013822, IPR022941, IPR027417, IPR036225, IPR036891, IPR042101	GO:0003924, GO:0005525, GO:0005786, GO:0006614, GO:0008312, GO:0032550, GO:0048500
TraesCS1A02G327300	Signal recognition particle 54 kDa protein [Source:UniProtKB/TrEMBL;Acc:A0A1D5RT63]	1A	516848847	516851758												IPR000897, IPR003593, IPR004125, IPR006325, IPR013822, IPR022941, IPR027417, IPR036225, IPR036891, IPR042101	GO:0003924, GO:0005525, GO:0005786, GO:0006614, GO:0008312, GO:0032550, GO:0048500
TraesCS1A02G327400	Formin-like protein [Source:UniProtKB/TrEMBL;Acc:A0A341NR75]	1A	517073970	517078521	Ta.30373.1.A1_at	16.9406	4.08242	34.7868	5.12047	11.6199	3.53852	33.7041	5.07485	16.7522	4.06628	IPR015425, IPR042201
TraesCS1A02G327500		1A	517090860	517091625	Ta.14241.1.S1_x_at	41.1044	5.36122	29.9347	4.90375	20.3985	4.35039	16.2231	4.01998	10.2083	3.35167
TraesCS1A02G327600		1A	517096424	517096741												IPR012876
TraesCS1A02G327700		1A	517095424	517101137												IPR000424, IPR011344, IPR012340	GO:0003697, GO:0006260
TraesCS1A02G327800		1A	517101786	517106237	Ta.21101.1.S1_at	92.6412	6.53358	760.161	9.57016	743.883	9.53893	1783.44	10.8004	1894.64	10.8877	IPR003196, IPR011039, IPR036388, IPR036390, IPR040450, IPR040504	GO:0005674, GO:0006366, GO:0006367, GO:0030554, GO:0032550, GO:0032559
TraesCS1A02G327900		1A	517186972	517187646												IPR002160, IPR011065	GO:0004857, GO:0004866, GO:0061135
TraesCS1A02G328000	Poly [ADP-ribose] polymerase [Source:UniProtKB/TrEMBL;Acc:A0A096UJY5]	1A	517377219	517382632												IPR001357, IPR004102, IPR008893, IPR012317, IPR012982, IPR036420, IPR036616, IPR036930, IPR038650	GO:0003950, GO:0006471
TraesCS1A02G328100		1A	517398036	517399020	Ta.5742.1.A1_at; Ta.5742.1.A1_x_at	515.71	9.01042	2324.91	11.183	2099.29	11.0357	1168.67	10.1907	2048.47	11.0003	IPR007612, IPR025659, IPR038595
TraesCS1A02G328200		1A	517400113	517405386												IPR000184, IPR039910	GO:0019867
TraesCS1A02G328300		1A	517408815	517413636												IPR011016, IPR013083	GO:0008270, GO:0016021
TraesCS1A02G328400		1A	517486953	517489286
TraesCS1A02G328500		1A	517489914	517490718												IPR010666,	GO:0008270, GO:0016021,
TraesCS1A02G328600		1A	517497832	517503438												IPR002222, IPR005713, IPR020934, IPR023575	GO:0003723, GO:0003735, GO:0005840, GO:0006412, GO:0015935
TraesCS1A02G328700	Coilin [Source:Projected from Arabidopsis thaliana (AT1G13030) UniProtKB/Swiss-Prot;Acc:Q8RWK8]	1A	517509244	517518349												IPR024822, IPR031722
TraesCS1A02G328800		1A	517519807	517520544												IPR001471, IPR016177, IPR036955	GO:0003677, GO:0003700, GO:0006355
TraesCS1A02G329000		1A	517745391	517745799
TraesCS1A02G329200		1A	518015077	518021797												IPR001394, IPR018200, IPR028889, IPR038765	GO:0006511, GO:0016579, GO:0036459
TraesCS1A02G329300		1A	518046191	518047641												IPR001810, IPR036047	GO:0005515
TraesCS1A02G329400		1A	518058089	518085731	Ta.7267.1.S1_at	70.6119	6.14184	441.307	8.78564	509.501	8.99294	343.205	8.42293	233.406	7.8667	IPR000403, IPR003152, IPR011009, IPR014009, IPR015519, IPR016024, IPR018936, IPR036940	GO:0000077, GO:0000723, GO:0004674, GO:0005515, GO:0006281, GO:0010212, GO:0016301, GO:0016572, GO:0030554, GO:0032550, GO:0032559
TraesCS1A02G331200		1A	520337993	520344774	Ta.27920.1.S1_at; TaAffx.110741.1.S1_s_at	53.9813	5.75439	134.167	7.06789	172.719	7.43228	146.637	7.19611	158.547	7.30877	IPR000178, IPR000795, IPR005225, IPR009000, IPR015760, IPR023115, IPR027417, IPR036925	GO:0003743, GO:0003924, GO:0005525, GO:0005622, GO:0006413, GO:0032550, GO:0097367
TraesCS1A02G331300		1A	520350074	520355366												IPR005123, IPR026992, IPR027443	GO:0016491, GO:0055114
TraesCS1A02G331400		1A	520393463	520395061												IPR005123, IPR026992, IPR027443	GO:0016491, GO:0046872, GO:0055114
TraesCS1A02G331500		1A	520401046	520401650												IPR026992, IPR027443
TraesCS1A02G331600		1A	520401782	520402321	TaAffx.93223.1.A1_at	22.81	4.51159	260.929	8.02751	198.357	7.63195	192.887	7.59162	191.544	7.58153	IPR005123, IPR027443	GO:0016491, GO:0055114
TraesCS1A02G331700		1A	520412916	520417089												IPR006634	GO:0016021
TraesCS1A02G331800		1A	520569996	520574179												IPR029044	GO:0016021
TraesCS1A02G331900		1A	520579667	520584624	Ta.13035.1.A1_at	152.673	7.2543	1379.34	10.4298	1140.54	10.1555	1191.57	10.2186	1212.5	10.2438	IPR005607
TraesCS1A02G332000		1A	520763140	520764091	TaAffx.105347.1.S1_at	8.51	3.08916	42.0776	5.39498	34.0615	5.09007	57.0525	5.83422	56.4128	5.81795
TraesCS1A02G332100		1A	520769045	520769515												IPR003340, IPR015300	GO:0003677, GO:0005634, GO:0006351, GO:0006355
TraesCS1A02G332200		1A	520789098	520792010												IPR025638	GO:0007623
TraesCS1A02G332300		1A	520793444	520793812												IPR039618
TraesCS1A02G332400		1A	520810335	520814520												IPR012423	GO:0005634, GO:0006355, GO:0043189
TraesCS1A02G332500		1A	520819952	520822444	Ta.29552.1.S1_a_at; Ta.29552.2.S1_at; Ta.29552.3.S1_s_at	149.986	7.22869	820.695	9.6807	854.156	9.73836	781.638	9.61036	617.898	9.27122	IPR012946
TraesCS1A02G332600		1A	520938291	520940709	TaAffx.84442.1.S1_at	9.04625	3.17732	7.70235	2.9453	8.99766	3.16955	4.81314	2.26698	19.4742	4.28349	IPR005333, IPR017887	GO:0003677, GO:0003700, GO:0005634, GO:0006351, GO:0006355
TraesCS1A02G332800	Calcium-transporting ATPase [Source:UniProtKB/TrEMBL;Acc:A0A1D5RWA6]	1A	521256437	521260120												IPR001757, IPR004014, IPR006068, IPR006408, IPR008250, IPR018303, IPR023214, IPR023298, IPR023299, IPR036412	GO:0000166, GO:0005388, GO:0005524, GO:0016020, GO:0016021, GO:0030554, GO:0032550, GO:0032559, GO:0070588
TraesCS1A02G332900		1A	521269653	521274466	TaAffx.64797.1.A1_at; TaAffx.64897.1.S1_at	10.8716	3.44249	90.5075	6.49997	49.5175	5.62987	41.4891	5.37466	58.4976	5.8703	IPR004274, IPR023214, IPR036412	GO:0005744, GO:0015031
TraesCS1A02G333000	Hydroxyproline-rich glycoprotein family protein [Source:Projected from Arabidopsis thaliana (AT1G73840) UniProtKB/TrEMBL;Acc:Q8VYM7]	1A	521275806	521279686	Ta.10847.1.S1_at	212.206	7.72932	1251.97	10.29	1342.8	10.391	1405.56	10.4569	1039.11	10.0211	IPR025742, IPR026896, IPR038192	GO:0009749, GO:0031124, GO:0035194
TraesCS1A02G333100		1A	521286013	521287322												IPR010666	GO:0008270
TraesCS1A02G333200	Probable magnesium transporter [Source:UniProtKB/TrEMBL;Acc:W4ZSI2]	1A	521288999	521292366	TaAffx.37852.1.A1_at	43.8769	5.45539	231.976	7.85783	309.957	8.27592	295.903	8.20898	250.353	7.96782	IPR008521	GO:0005769, GO:0005886, GO:0015095, GO:0015693, GO:0016021
TraesCS1A02G333300		1A	521312189	521312933												IPR003653, IPR038765	GO:0006508, GO:0008234
TraesCS1A02G333400		1A	521322211	521323613	Ta.10037.1.S1_a_at; Ta.10037.1.S1_at; Ta.10037.2.S1_at	21.7442	4.44256	108.926	6.7672	95.2238	6.57325	147.165	7.20129	142.092	7.15068	IPR001705, IPR011332, IPR018264, IPR038584	GO:0000027, GO:0003735, GO:0005840, GO:0006412, GO:0015934
TraesCS1A02G333500		1A	521323895	521334581												IPR005069
TraesCS1A02G333600		1A	521331628	521333842	TaAffx.128610.1.S1_at	22.5794	4.49693	9.60198	3.26333	6.70186	2.74456	6.52198	2.70531	5.4154	2.43707	IPR001806, IPR003578, IPR005225, IPR027417	GO:0003924, GO:0005525, GO:0005622, GO:0005634, GO:0005737, GO:0005856, GO:0005886, GO:0005938, GO:0007015, GO:0007163, GO:0007264, GO:0008360, GO:0016020, GO:0019901, GO:0030036, GO:0030865, GO:0031410, GO:0031982, GO:0032550, GO:0032956, GO:0042995, GO:0043231
TraesCS1A02G333700	Proline iminopeptidase [Source:UniProtKB/TrEMBL;Acc:A0A1D5RTN9]	1A	521337020	521340794	Ta.3467.1.S1_at; Ta.3467.2.S1_a_at; Ta.3467.2.S1_x_at; TaAffx.111898.1.S1_s_at	73.2523	6.1948	495.616	8.95308	599.854	9.22847	442.513	8.78958	725.157	9.50215	IPR000073, IPR002410, IPR005944, IPR029058	GO:0004177, GO:0005737, GO:0006508, GO:0008233
TraesCS1A02G333800	Non-specific serine/threonine protein kinase [Source:UniProtKB/TrEMBL;Acc:A0A1D5RXG7]	1A	521629027	521630592	Ta.28384.1.S1_at; Ta.28384.1.S1_s_at	305.986	8.25732	1713.39	10.7426	2795.35	11.4488	2959.23	11.531	2420.82	11.2413	IPR000719, IPR004041, IPR008271, IPR011009, IPR017441, IPR018451	GO:0004672, GO:0004674, GO:0005524, GO:0006468, GO:0007165, GO:0030554, GO:0032550, GO:0032559
TraesCS1A02G333900	Tubby-like F-box protein [Source:UniProtKB/TrEMBL;Acc:A0A1D5S0A4]	1A	521639465	521644810	Ta.9131.1.S1_at; Ta.9131.3.S1_a_at	446.403	8.8022	5079.18	12.3104	4397.06	12.1023	4405.7	12.1052	3039.43	11.5696	IPR000007, IPR001810, IPR018066, IPR025659, IPR036047	GO:0005515
TraesCS1A02G334000		1A	521673578	521675221												IPR007789
TraesCS1A02G334100		1A	521738721	521739592												IPR003851	GO:0003677, GO:0006355
TraesCS1A02G334200		1A	521844693	521845628												IPR029688
TraesCS1A02G334300		1A	521863458	521864126
TraesCS1A02G334400		1A	521876736	521878499												IPR005123, IPR026992, IPR027443	GO:0016491, GO:0046872, GO:0055114
TraesCS1A02G334500		1A	521907397	521907627												IPR039616
TraesCS1A02G334600		1A	521912319	521912588
TraesCS1A02G334700		1A	521977589	521979551												IPR001128, IPR002401, IPR017972, IPR036396	GO:0004497, GO:0005506, GO:0016705, GO:0020037, GO:0055114
TraesCS1A02G334800		1A	522189569	522191557												IPR001128, IPR002401, IPR017972, IPR036396	GO:0004497, GO:0005506, GO:0016705, GO:0020037, GO:0055114
TraesCS1A02G334900	Auxin response factor [Source:UniProtKB/TrEMBL;Acc:A0A341NQM1]	1A	522229516	522235237	Ta.9707.1.S1_at; Ta.9707.1.S1_x_at	24.4534	4.61197	35.4747	5.14872	14.7038	3.87812	150.801	7.2365	106.408	6.73346	IPR003340, IPR010525, IPR015300	GO:0003677, GO:0005634, GO:0006355, GO:0009725
TraesCS1A02G335000		1A	522236430	522237289												IPR024752
TraesCS1A02G335100		1A	522239104	522243100												IPR001077, IPR012967, IPR016461, IPR029063, IPR036388, IPR036390	GO:0008171, GO:0046983
TraesCS1A02G335200		1A	522463391	522472915												IPR001077, IPR012967, IPR016461, IPR029063, IPR036388, IPR036390	GO:0008171, GO:0046983
TraesCS1A02G335300		1A	522500226	522502152	Ta.16811.1.S1_s_at; Ta.211.1.S1_at	5.98281	2.58082	41.9347	5.39007	13.385	3.74254	148.9	7.2182	124.404	6.95889	IPR001077, IPR012967, IPR016461, IPR029063, IPR036388, IPR036390	GO:0008168, GO:0008171, GO:0016740, GO:0032259, GO:0046983
TraesCS1A02G335400		1A	522506031	522507534	Ta.13806.1.S1_at	10.37	3.37434	64.9002	6.02015	26.4705	4.72631	25.0493	4.6467	46.0436	5.52493	IPR001077, IPR012967, IPR016461, IPR022657, IPR029063, IPR036388, IPR036390	GO:0008171, GO:0046983
TraesCS1A02G335500		1A	522509275	522510932												IPR001077, IPR012967, IPR016461, IPR029063, IPR036388, IPR036390	GO:0008171, GO:0046983
TraesCS1A02G335600		1A	522514931	522516308												IPR001077, IPR012967, IPR016461, IPR029063, IPR036388, IPR036390	GO:0008171, GO:0046983
TraesCS1A02G335700		1A	522533508	522538864												IPR001077, IPR012967, IPR016461, IPR029063, IPR036388, IPR036390	GO:0008171, GO:0046983
TraesCS1A02G335800		1A	522881358	522882831												IPR001077, IPR012967, IPR016461, IPR029063, IPR036388, IPR036390	GO:0008171, GO:0046983
TraesCS1A02G335900		1A	522950013	522953483												IPR039277	GO:0006355, GO:0048578
TraesCS1A02G336000		1A	522954462	522958922	Ta.2663.2.A1_a_at	410.002	8.67949	1830.63	10.8381	2154.64	11.0732	1519.08	10.569	1308.03	10.3532	IPR000795, IPR004161, IPR009000, IPR009001, IPR015256, IPR027417	GO:0003924, GO:0005525, GO:0032550
TraesCS1A02G336100		1A	522964517	522968056												IPR019380, IPR039876
TraesCS1A02G336200		1A	522972095	522973618												IPR001810, IPR036047	GO:0005515
TraesCS1A02G336300		1A	522980026	522982149													GO:0016020, GO:0016021
TraesCS1A02G339000		1A	528932311	528933254												IPR039923
TraesCS1A02G339100		1A	529126241	529126690												IPR007608
TraesCS1A02G339200		1A	529242438	529243257
TraesCS1A02G339300		1A	529244047	529249909	Ta.6534.1.S1_at; Ta.6534.1.S1_s_at; Ta.6534.2.S1_at	79.3946	6.31097	975.597	9.93014	549.755	9.10265	366.275	8.51678	441.738	8.78705	IPR001830, IPR003337, IPR012766, IPR023214, IPR036412	GO:0003824, GO:0003825, GO:0005992
TraesCS1A02G339400		1A	529664143	529665828												IPR001087, IPR035669, IPR036514	GO:0016788
TraesCS1A02G339500		1A	529665844	529671485	Ta.12200.1.A1_at	58.335	5.86629	328.183	8.35836	306.279	8.2587	266.129	8.05598	167.614	7.389
TraesCS1A02G339600		1A	530170540	530174060	Ta.11295.1.A1_at; TaAffx.71699.1.S1_at	94.1225	6.55647	692.656	9.436	621.829	9.28038	707.913	9.46743	621.747	9.28018	IPR000719, IPR001245, IPR008271, IPR011009	GO:0004672, GO:0005524, GO:0006468, GO:0030554, GO:0032550, GO:0032559
TraesCS1A02G339700		1A	530176569	530178328	Ta.12135.1.A1_at; Ta.12135.1.A1_s_at	58.7756	5.87715	819.272	9.6782	551.115	9.10621	1129.17	10.141	824.915	9.6881	IPR006502
TraesCS1A02G339800		1A	530203238	530208368												IPR006852	GO:0006672, GO:0016021, GO:0016811,
TraesCS1A02G339900	NSF [Source:Projected from Arabidopsis thaliana (AT4G04910) UniProtKB/TrEMBL;Acc:A0A178UTB9]	1A	530210522	530217808	Ta.10189.2.S1_at; Ta.10189.3.S1_a_at	125.3	6.96924	392.48	8.61648	414.953	8.6968	401.435	8.64902	451.429	8.81836	IPR003338, IPR003593, IPR003959, IPR003960, IPR004201, IPR009010, IPR027417, IPR029067, IPR039812, IPR041569	GO:0005524, GO:0016887, GO:0030554, GO:0032550, GO:0032559, GO:0035494, GO:0097367
TraesCS1A02G340000		1A	530232382	530237381												IPR001680, IPR007148, IPR015943, IPR017986, IPR019775, IPR020472, IPR027145, IPR036322	GO:0005515
TraesCS1A02G340100		1A	530257082	530260545												IPR001270, IPR003593, IPR003959, IPR004176, IPR018368, IPR019489, IPR027417, IPR028299, IPR036628, IPR041546	GO:0000166, GO:0005524, GO:0016887, GO:0019538, GO:0030554, GO:0032550, GO:0032559, GO:0034605
TraesCS1A02G340200		1A	530511919	530515502	TaAffx.132016.1.S1_at	142.622	7.15605	669.818	9.38763	772.67	9.59371	833.595	9.7032	825.374	9.6889	IPR002876, IPR017856, IPR026564, IPR029072	GO:0009507
TraesCS1A02G340300		1A	530515730	530523983												IPR000152, IPR000719, IPR000742, IPR001245, IPR001881, IPR008271, IPR011009, IPR017441, IPR018097, IPR025287	GO:001707, GO:0001882, GO:0001883, GO:0004672, GO:0005509, GO:0005524, GO:0006468, GO:0016021, GO:0030247, GO:0030554, GO:0032550, GO:0032553, GO:0032555, GO:0032559, GO:0097367
TraesCS1A02G340400		1A	530593686	530600419	Ta.9644.1.S1_at	271.378	8.08416	1183.01	10.2082	1342.08	10.3903	1662.93	10.6995	2386.54	11.2207	IPR003674	GO:0004576, GO:0006486, GO:0015081, GO:0016020, GO:0016021
TraesCS1A02G340500		1A	530726271	530727004												IPR007218	GO:0006260, GO:0042025
TraesCS1A02G340600	Nuclear pore complex protein NUP35 [Source:UniProtKB/TrEMBL;Acc:A0A341NRL5]	1A	530728795	530731511												IPR007846, IPR012677, IPR017389, IPR035979	GO:0003676, GO:0006913, GO:0031965
TraesCS1A02G340700		1A	530731929	530736293												IPR002833, IPR023476	GO:0004045
TraesCS1A02G340800		1A	530773565	530774955	TaAffx.28998.1.S1_at	5.02125	2.32805	2.1769	1.12228	22.9753	4.52201	18.9903	4.24719	9.02252	3.17353
TraesCS1A02G340900	GATA transcription factor [Source:UniProtKB/TrEMBL;Acc:A0A1D5RWN2]	1A	530780002	530782491	Ta.21016.1.S1_s_at; TaAffx.16096.1.A1_at	47.6194	5.57348	103.049	6.68718	162.494	7.34425	155.353	7.27941	121.03	6.91922	IPR000679, IPR013088, IPR016679	GO:0003677, GO:0003700, GO:0005634, GO:0006355, GO:0008270, GO:0043565, GO:0045893
TraesCS1A02G341000		1A	530808740	530809506												IPR012876
TraesCS1A02G341100		1A	530810341	530812326												IPR003663, IPR005828, IPR005829, IPR020846, IPR036259	GO:0016020, GO:0016021, GO:0022857, GO:0055085
TraesCS1A02G341200		1A	530883540	530884786												IPR008480
TraesCS1A02G341300	BAHD acyltransferase DCR [Source:Projected from Arabidopsis thaliana (AT5G23940) UniProtKB/Swiss-Prot;Acc:Q9FF86]	1A	531023766	531028367	Ta.12753.1.S1_at	201.423	7.65408	437.215	8.7722	414.658	8.69578	296.967	8.21416	69.4725	6.11837	IPR003480, IPR023213	GO:0005737, GO:0010090, GO:0010143, GO:0016747, GO:0051179
TraesCS1A02G341400		1A	531047359	531049493												IPR001841, IPR013083, IPR032008, IPR032010	GO:0016021
TraesCS1A02G341500		1A	531051787	531059503												IPR001715, IPR001752, IPR027417, IPR027640, IPR036872, IPR036961	GO:0003777, GO:0005515, GO:0005524, GO:0007018, GO:0008017, GO:0030554, GO:0032550, GO:0032559
TraesCS1A02G341600		1A	531222220	531224465												IPR036641	GO:0000160, GO:0030554, GO:0032550, GO:0032559
TraesCS1A02G341700		1A	531227499	531237925												IPR003111, IPR004910, IPR015947, IPR034750
TraesCS1A02G355900		1A	539279131	539279556												IPR003958, IPR009072	GO:0005634, GO:0046982
TraesCS1A02G356000		1A	539315813	539316788
TraesCS1A02G356100	Peroxidase [Source:UniProtKB/TrEMBL;Acc:W4ZPZ0]	1A	539323095	539324401												IPR000823, IPR002016, IPR010255, IPR019793, IPR019794, IPR033905	GO:0004601, GO:0005576, GO:0006979, GO:0020037, GO:0042744, GO:0046872, GO:0055114
TraesCS1A02G356200		1A	539329708	539335195	Ta.7179.1.A1_at; Ta.7179.2.S1_at	31.8253	4.9921	237.038	7.88897	260.339	8.02425	199.34	7.63909	222.204	7.79574	IPR018108, IPR023395	GO:0016021
TraesCS1A02G356300	Serine/threonine-protein kinase [Source:UniProtKB/TrEMBL;Acc:A0A1D5RTA9]	1A	539425583	539428443												IPR000719, IPR000858, IPR001480, IPR003609, IPR008271, IPR011009, IPR017441, IPR024171, IPR036426	GO:0004672, GO:0004674, GO:0005524, GO:0006468, GO:0016021, GO:0030554, GO:0032550, GO:0032559, GO:0048544
TraesCS1A02G356400	Serine/threonine-protein kinase [Source:UniProtKB/TrEMBL;Acc:A0A1D6RDH9]	1A	539614078	539616608												IPR000719, IPR000858, IPR001480, IPR003609, IPR008271, IPR011009, IPR017441, IPR024171, IPR036426	GO:0004672, GO:0004674, GO:0005524, GO:0006468, GO:0030554, GO:0032550, GO:0032559, GO:0048544
TraesCS1A02G356600		1A	539720660	539724029												IPR000719, IPR000742, IPR000858, IPR001480, IPR003609, IPR008271, IPR011009, IPR036426	GO:0004672, GO:0005524, GO:0006468, GO:0030554, GO:0032550, GO:0032559, GO:0048544
TraesCS1A02G356700		1A	539748952	539750556												IPR002885, IPR011990	GO:0005515
TraesCS1A02G356900		1A	539759853	539763795	Ta.29440.1.S1_at; Ta.29440.2.S1_a_at; TaAffx.54524.1.S1_at	38.5329	5.26802	1008.54	9.97805	1148.56	10.1656	957.42	9.90301	850.913	9.73287	IPR011009	GO:0030554, GO:0032550, GO:0032559,
TraesCS1A02G357000		1A	539841923	539842255
TraesCS1A02G357100		1A	539872088	539883999												IPR000778, IPR011992, IPR013112, IPR013121, IPR013623, IPR017927, IPR017938, IPR039261	GO:0004601, GO:0016020, GO:0016021, GO:0016491, GO:0050664, GO:0055114
TraesCS1A02G357200	6-phosphogluconate dehydrogenase, decarboxylating [Source:UniProtKB/TrEMBL;Acc:A0A341NU59]	1A	539899281	539901954												IPR006113, IPR006114, IPR006115, IPR006183, IPR008927, IPR013328, IPR036291	GO:0004616, GO:0006098, GO:0016491, GO:0050661, GO:0055114
TraesCS1A02G357300		1A	539964292	539969025												IPR000300, IPR005135, IPR036691	GO:0016787, GO:0046856
TraesCS1A02G357400		1A	539973877	539978007												IPR003029, IPR012340, IPR022967	GO:0003676
TraesCS1A02G357500		1A	540047477	540052240	Ta.2270.1.S1_at; Ta.2270.2.S1_a_at; Ta.2270.3.S1_a_at	214.387	7.74407	512.4	9.00113	608.527	9.24918	426.824	8.7375	389.791	8.60656	IPR000048, IPR025064	GO:0005515
TraesCS1A02G357600		1A	540062518	540064393												IPR001005, IPR006447, IPR009057, IPR017930, IPR043363	GO:0003677, GO:0005634
TraesCS1A02G357700		1A	540124030	540124804	Ta.4294.1.S1_at	79.55	6.31379	44.2141	5.46644	23.5682	4.55877	44.0612	5.46144	56.2653	5.81417	IPR036312
TraesCS1A02G357800		1A	540134248	540135929												IPR001471, IPR016177, IPR036955	GO:0003677, GO:0003700, GO:0006355
TraesCS1A02G357900		1A	540143413	540150615												IPR015590, IPR016160, IPR016161, IPR016162, IPR016163	GO:0003842, GO:0005739, GO:0008270, GO:0009507, GO:0009651, GO:0010133, GO:0016491, GO:0016620, GO:0050897, GO:0055114, GO:0072593
TraesCS1A02G358000		1A	540152157	540154702	Ta.21047.1.S1_x_at; Ta.21047.2.S1_at; Ta.21047.2.S1_x_at; Ta.21047.3.S1_a_at	81.338	6.34586	913.227	9.83483	1000.83	9.96699	986.224	9.94577	893.139	9.80274	IPR001806, IPR005225, IPR027417	GO:0003924, GO:0005525, GO:0030554, GO:0032550, GO:0032559, GO:0097367
TraesCS1A02G358100		1A	540191129	540192273												IPR003657, IPR036576	GO:0003700, GO:0005634, GO:0006355, GO:0043565
TraesCS1A02G358200		1A	540195023	540196890												IPR001680, IPR015943, IPR017986, IPR019775, IPR020472, IPR036322	GO:0005515
TraesCS1A02G358300		1A	540201483	540202445												IPR011009	GO:0016020, GO:0016021
TraesCS1A02G358400		1A	540286427	540287431												IPR003657, IPR036576	GO:0003700, GO:0005634, GO:0006355, GO:0043565
TraesCS1A02G358500		1A	540320446	540336598												IPR000048, IPR001609, IPR002710, IPR027417, IPR036018, IPR036961	GO:001707, GO:0001882, GO:0001883, GO:0003774, GO:0005515, GO:0005524, GO:0016459, GO:0030554, GO:0032550, GO:0032553, GO:0032555, GO:0032559, GO:0097367
TraesCS1A02G358600		1A	540336968	540339603	Ta.26201.1.S1_at	49.2325	5.62154	824.275	9.68698	885.508	9.79036	1328.96	10.3761	654.382	9.35399	IPR000222, IPR001932, IPR015655, IPR036457	GO:0003824, GO:0004722, GO:0006470, GO:0043169, GO:0046872
TraesCS1A02G358700	Sulfotransferase [Source:UniProtKB/TrEMBL;Acc:A0A341P2W0]	1A	540401119	540402130												IPR000863, IPR027417	GO:0008146
TraesCS1A02G358900	Sulfotransferase [Source:UniProtKB/TrEMBL;Acc:A0A341NRF4]	1A	540413753	540415019												IPR000863, IPR027417	GO:0008146
TraesCS1A02G359000		1A	540463716	540464555
TraesCS1A02G359100		1A	540627350	540628804												IPR000719, IPR008271, IPR011009, IPR017441	GO:0004672, GO:0005524, GO:0006468, GO:0030554, GO:0032550, GO:0032559, GO:0097367
TraesCS1A02G359200		1A	540634019	540643564												IPR000719, IPR011009	GO:0004672, GO:0005524, GO:0006468
TraesCS1A02G359300		1A	540647139	540657788												IPR022742, IPR029058
TraesCS1A02G359400		1A	540887567	540888605	TaAffx.98869.1.S1_at	87.1194	6.44492	407.675	8.67128	612.483	9.25853	333.064	8.37966	613.58	9.26111		GO:0016021
TraesCS1A02G376400	CRS1 / YhbY (CRM) domain-containing protein [Source:Projected from Arabidopsis thaliana (AT3G18390) UniProtKB/TrEMBL;Acc:Q9LS51]	1A	550611490	550616190												IPR001890, IPR035920	GO:0003723
TraesCS1A02G376500		1A	550621858	550631769												IPR037476	GO:0010099
TraesCS1A02G376600		1A	550633033	550637900												IPR002182, IPR027417, IPR032675, IPR038005, IPR041118	GO:0003735, GO:0005524, GO:0005634, GO:0005739, GO:0005829, GO:0005840, GO:0005886, GO:0006412, GO:0006915, GO:0007165, GO:0009409, GO:0009626, GO:0009817, GO:0010082, GO:0012505, GO:0016021, GO:0017111, GO:0030275, GO:0030554, GO:0032550, GO:0032559, GO:0042742, GO:0043531, GO:0046713, GO:0097367
TraesCS1A02G376700		1A	550649769	550650011
TraesCS1A02G376800		1A	550655472	550655788
TraesCS1A02G376900		1A	550661303	550661545
TraesCS1A02G377000		1A	550669384	550669599
TraesCS1A02G377100		1A	550674756	550674998
TraesCS1A02G377200		1A	550695653	550695886
TraesCS1A02G377300		1A	550700640	550700882
TraesCS1A02G377400		1A	550704228	550705323	TaAffx.110395.1.S1_at	13.9938	3.80671	116.733	6.86706	134.679	7.07338	51.8014	5.69492	61.4245	5.94074
TraesCS1A02G377500		1A	550793412	550793654
TraesCS1A02G377600		1A	550824653	550824895
TraesCS1A02G377700		1A	550875583	550886316												IPR019136, IPR040454, IPR041499, IPR042536	GO:0000127, GO:0006384
TraesCS1A02G377800		1A	550892709	550895165												IPR002885, IPR011990	GO:0005515
TraesCS1A02G377900	Hexosyltransferase [Source:UniProtKB/TrEMBL;Acc:A0A1D5RTT1]	1A	550967927	550969339	TaAffx.110082.1.S1_at	24.7994	4.63223	40.1675	5.32796	51.8175	5.69537	12.6427	3.66023	43.728	5.45049	IPR002659, IPR029044	GO:0000139, GO:0006486, GO:0008378, GO:0016020, GO:0016021
TraesCS1A02G378000		1A	550969936	550972182	Ta.7378.4.S1_at	244.807	7.9355	245.113	7.9373	339.24	8.40616	626.004	9.29003	447.761	8.80659	IPR001680, IPR015943, IPR017986, IPR019775, IPR020472, IPR036322	GO:0005515
TraesCS1A02G378100		1A	551049064	551050825												IPR011016, IPR013083, IPR022143, IPR033275	GO:0008270, GO:0016021
TraesCS1A02G378200	Sulfhydryl oxidase [Source:UniProtKB/TrEMBL;Acc:A0A1D5RXG1]	1A	551050692	551055525	Ta.5536.1.S1_at; Ta.5536.2.S1_a_at	160.438	7.32587	1265.45	10.3054	1292.21	10.3356	1457.19	10.509	1457.61	10.5094	IPR013766, IPR017905, IPR017937, IPR036249, IPR036774, IPR039798	GO:0005623, GO:0016021, GO:0016971, GO:0016972, GO:0045454, GO:0055114
TraesCS1A02G378300		1A	551155881	551157589												IPR002213, IPR035595	GO:0016758
TraesCS1A02G378400		1A	551196438	551197763												IPR001810, IPR036047	GO:0005515
TraesCS1A02G378500		1A	551213062	551214004												IPR025322
TraesCS1A02G378600		1A	551278287	551281179												IPR004559, IPR006638, IPR007197, IPR023404, IPR034505	GO:0003824, GO:0004109, GO:0005737, GO:0006779, GO:0051536, GO:0051539
TraesCS1A02G378700		1A	551307159	551308946	TaAffx.118946.1.S1_at; TaAffx.91675.1.A1_at	9.52844	3.25224	22.034	4.46166	29.0285	4.8594	42.8203	5.42022	40.0584	5.32403	IPR000210, IPR002083, IPR008974, IPR011333, IPR034090	GO:0005515
TraesCS1A02G378800		1A	551311077	551312770	TaAffx.37020.1.S1_at	9.58687	3.26106	38.5585	5.26898	28.9048	4.85324	17.0527	4.09193	8.22682	3.04034	IPR000210, IPR002083, IPR008974, IPR011333, IPR034090	GO:0005515
TraesCS1A02G378900		1A	551313777	551317799	TaAffx.9502.1.S1_at	28.485	4.83213	29.4788	4.88161	17.8395	4.157	11.0284	3.46315	10.6129	3.40775	IPR007145	GO:0000226, GO:0008017
TraesCS1A02G379000	ATP synthase subunit beta [Source:UniProtKB/TrEMBL;Acc:A0A341NUX2]	1A	551320074	551323790	Ta.5.1.S1_at	2009.61	10.9727	13310.5	13.7003	11531.7	13.4933	8061.42	12.9768	7645.4	12.9004	IPR000194, IPR003593, IPR004100, IPR005722, IPR020003, IPR020971, IPR024034, IPR027417, IPR036121	GO:0000166, GO:0000275, GO:0001883, GO:0005524, GO:0005739, GO:0005743, GO:0006754, GO:0006811, GO:0015986, GO:0016020, GO:0016887, GO:0030554, GO:0032550, GO:0032553, GO:0032555, GO:0032559, GO:0045261, GO:0046034, GO:0046933, GO:0046961, GO:0097367, GO:1902600
TraesCS1A02G379100		1A	551443260	551463648												IPR002182, IPR027417, IPR032675, IPR041118	GO:0030554, GO:0032550, GO:0032559, GO:0043531
TraesCS1A02G379200		1A	551479529	551482223												IPR000504, IPR012677, IPR034353, IPR035979, IPR039119	GO:0003676
TraesCS1A02G379300		1A	551484006	551487641												IPR002687, IPR012974, IPR012976, IPR029012, IPR036070, IPR042239
TraesCS1A02G379400		1A	551493136	551494119
TraesCS1A02G379500		1A	551530360	551533816	TaAffx.107751.1.S1_at; TaAffx.21775.1.S1_at	44.6028	5.47906	249.89	7.96515	270.809	8.08113	373.985	8.54684	341.281	8.41482	IPR001810, IPR032675, IPR036047	GO:0005515
TraesCS1A02G379600		1A	551540230	551543012												IPR004813	GO:0055085
TraesCS1A02G379700		1A	551591836	551593360												IPR001005, IPR009057, IPR017930	GO:0003677
TraesCS1A02G379800	SYP71 protein [Source:UniProtKB/TrEMBL;Acc:V5V8A5]	1A	551601664	551605185	Ta.6402.1.S1_at; Ta.6402.2.A1_a_at	702.464	9.45628	2795.67	11.449	2926.97	11.5152	3133.72	11.6137	3527.23	11.7843	IPR000727, IPR006012	GO:0000149, GO:0005484, GO:0005622, GO:0006886, GO:0006906, GO:0012505, GO:0015031, GO:0016020, GO:0016021, GO:0031201, GO:0048278
TraesCS1A02G379900		1A	551606487	551611069	Ta.5291.2.S1_a_at	47.3275	5.56461	249.098	7.96057	324.573	8.3424	315.647	8.30217	434.015	8.7616	IPR036249
TraesCS1A02G380000		1A	551632717	551634927												IPR032675	GO:0030554, GO:0032550, GO:0032559, GO:0043531
TraesCS1A02G380100		1A	551632964	551633413
TraesCS1A02G380200		1A	551641394	551641955
TraesCS1A02G380300		1A	551654625	551657536
TraesCS1A02G380400		1A	551662498	551663107
TraesCS1A02G380500		1A	551671929	551673305												IPR036047	GO:0005515
TraesCS1A02G380600		1A	551679208	551680541												IPR000210, IPR003131, IPR011333	GO:0005515, GO:0051260
TraesCS1A02G380700		1A	551744256	551746623	TaAffx.31834.1.S1_s_at	5.495	2.45812	9.73028	3.28248	26.4297	4.72409	3.79331	1.92346	4.72301	2.23971	IPR006818, IPR036747	GO:0005634, GO:0006333
TraesCS1A02G380800		1A	551812639	551813208												IPR000210, IPR011333, IPR034090	GO:0005515
TraesCS1A02G380900	Protein DETOXIFICATION [Source:UniProtKB/TrEMBL;Acc:A0A1D5RWF9]	1A	551874880	551879890												IPR002528	GO:0015238, GO:0015297, GO:0016020, GO:0016021, GO:0042910, GO:0055085
TraesCS1A02G381100		1A	551980845	551981711												IPR000206, IPR013823, IPR014719, IPR015608	GO:0003735, GO:0005840, GO:0006412
TraesCS1A02G381200		1A	551982009	551984293												IPR008504, IPR029008	GO:0000045, GO:0005783, GO:0016020, GO:0016021, GO:0072546
TraesCS1A02G381300		1A	552088574	552090608
TraesCS1A02G381400		1A	552119048	552119308
TraesCS1A02G381500		1A	552162788	552168044												IPR004277	GO:0006659, GO:0016021
TraesCS1A02G381600		1A	552181139	552182109												IPR003854
TraesCS1A02G381700		1A	552201760	552202432												IPR003854
TraesCS1A02G381800		1A	552211319	552213816	Ta.7633.1.S1_a_at; Ta.7633.2.S1_x_at	65.02	6.02281	266.442	8.05768	474.471	8.89018	777.02	9.60181	568.181	9.15021	IPR026907	GO:0051726
TraesCS1A02G381900		1A	552216524	552217958												IPR001810, IPR036047	GO:0005515
TraesCS1B02G024800		1B	12070989	12072628												IPR003480, IPR023213	GO:0016747
TraesCS1B02G024900		1B	12093427	12094500												IPR003480, IPR023213	GO:0016747
TraesCS1B02G025000		1B	12343414	12343656												IPR000864, IPR036354	GO:0004857, GO:0004866, GO:0004867, GO:0009611, GO:0061135
TraesCS1B02G025100		1B	12346287	12350704												IPR018170, IPR020471, IPR023210, IPR036812	GO:0016491, GO:0055114
TraesCS1B02G025200		1B	12357937	12358152												IPR000864, IPR036354	GO:0004857, GO:0004866, GO:0004867, GO:0009611, GO:0061135
TraesCS1B02G025300		1B	12373475	12373717												IPR000864, IPR036354	GO:0004857, GO:0004866, GO:0004867, GO:0009611, GO:0010466, GO:0010951, GO:0030414, GO:0061135
TraesCS1B02G025400		1B	12387552	12388175												IPR000877, IPR035995	GO:0004857, GO:0004866, GO:0004867, GO:0005576, GO:0061135
TraesCS1B02G025500		1B	12427311	12432859	TaAffx.36735.1.S1_at	11.0994	3.47241	71.329	6.15642	75.8589	6.24525	59.1938	5.88737	55.5455	5.7956	IPR002182, IPR027417, IPR038005, IPR041118	GO:0030554, GO:0032550, GO:0032559, GO:0043531
TraesCS1B02G025600		1B	12500563	12500805												IPR000864, IPR036354	GO:0004857, GO:0004866, GO:0004867, GO:0009611, GO:0010466, GO:0010951, GO:0030414, GO:0061135
TraesCS1B02G025700		1B	12570754	12570996												IPR000864, IPR036354	GO:0004857, GO:0004866, GO:0004867, GO:0009611, GO:0010466, GO:0010951, GO:0030414, GO:0061135
TraesCS1B02G025800	Fatty acyl-CoA reductase [Source:UniProtKB/TrEMBL;Acc:A0A341NW60]	1B	12681301	12706772												IPR013120, IPR026055, IPR033640, IPR036291	GO:0080019
TraesCS1B02G025900	Bowman-Birk trypsin inhibitor-like protein [Source:UniProtKB/TrEMBL;Acc:A9UIE3]	1B	12738008	12738798	Ta.11082.1.S1_x_at	10.6019	3.40625	65.5694	6.03495	89.0538	6.4766	66.064	6.04579	27.6394	4.78865	IPR000877, IPR035995	GO:0004857, GO:0004866, GO:0004867, GO:0005576, GO:0010466, GO:0010951, GO:0030414, GO:0061135
TraesCS1B02G026000		1B	12754088	12754659												IPR000877, IPR035995	GO:0004857, GO:0004866, GO:0004867, GO:0005576, GO:0061135
TraesCS1B02G026100		1B	12764054	12764269												IPR000864, IPR036354	GO:0004857, GO:0004866, GO:0004867, GO:0009611, GO:0061135
TraesCS1B02G026200		1B	12785194	12788030												IPR003406	GO:0008375, GO:0016020, GO:0016021
TraesCS1B02G026300		1B	12811607	12814290												IPR002182, IPR027417, IPR032675	GO:0003700, GO:0004252, GO:0006355, GO:0006508, GO:0006915, GO:0007165, GO:0009817, GO:0016021, GO:0017111, GO:0030554, GO:0032550, GO:0032559, GO:0043531, GO:2000071
TraesCS1B02G026400		1B	12815667	12816647												IPR002182, IPR027417, IPR038005, IPR041118	GO:0030554, GO:0032550, GO:0032559, GO:0043531
TraesCS1B02G026500		1B	12827618	12828676												IPR032675
TraesCS1B02G026600		1B	12942841	12946128												IPR018170, IPR020471, IPR023210, IPR036812	GO:0016491, GO:0055114
TraesCS1B02G026700		1B	12975409	12976118												IPR000877, IPR035995	GO:0004857, GO:0004866, GO:0004867, GO:0005576, GO:0061135
TraesCS1B02G026800		1B	13009896	13010111												IPR000864, IPR036354	GO:0004857, GO:0004866, GO:0004867, GO:0009611, GO:0010466, GO:0010951, GO:0030414, GO:0061135
TraesCS1B02G026900		1B	13014085	13014327												IPR000864, IPR036354	GO:0004857, GO:0004866, GO:0004867, GO:0009611, GO:0061135
TraesCS1B02G027000		1B	13039605	13044769												IPR002182, IPR027417, IPR032675, IPR038005, IPR041118	GO:0006952, GO:0030554, GO:0032550, GO:0032559, GO:0043531
TraesCS1B02G027100		1B	13178384	13191220												IPR002182, IPR027417, IPR032675, IPR038005, IPR041118	GO:0005524, GO:0006915, GO:0006952, GO:0017111, GO:0030554, GO:0032550, GO:0032559, GO:0043531
TraesCS1B02G027200		1B	13244021	13248866	Ta.4122.1.A1_at	5.0375	2.33271	4.87172	2.28443	1.98939	0.992329	7.85071	2.97282	2.51769	1.3321	IPR018170, IPR020471, IPR023210, IPR036812	GO:0016491, GO:0055114
TraesCS1B02G027300		1B	13268205	13277040												IPR002182, IPR027417, IPR032675, IPR038005, IPR041118	GO:0005524, GO:0006915, GO:0006952, GO:0017111, GO:0030554, GO:0032550, GO:0032559, GO:0043531
TraesCS1B02G027500		1B	13412257	13417222												IPR002182, IPR027417, IPR038005, IPR041118	GO:0030554, GO:0032550, GO:0032559, GO:0043531, GO:0097367
TraesCS1B02G027700		1B	13433942	13437332												IPR018170, IPR020471, IPR023210, IPR036812	GO:0016491, GO:0055114
TraesCS1B02G027800		1B	13447836	13448543												IPR000877, IPR035995	GO:0004857, GO:0004866, GO:0004867, GO:0005576, GO:0061135
TraesCS1B02G027900		1B	13497470	13497685												IPR000864, IPR036354	GO:0004857, GO:0004866, GO:0004867, GO:0009611, GO:0010466, GO:0010951, GO:0030414, GO:0061135
TraesCS1B02G028000		1B	13501496	13501738												IPR000864, IPR002052, IPR036354	GO:0003676, GO:0004857, GO:0004866, GO:0004867, GO:0008168, GO:0009611, GO:0032259, GO:0061135
TraesCS1B02G028100		1B	13504294	13504509												IPR000864, IPR036354	GO:0004857, GO:0004866, GO:0004867, GO:0009611, GO:0061135
TraesCS1B02G028200		1B	13564868	13565083												IPR000864, IPR036354	GO:0004857, GO:0004866, GO:0004867, GO:0009611, GO:0061135
TraesCS1B02G028300		1B	13665542	13668321												IPR018170, IPR020471, IPR023210, IPR036812	GO:0016491, GO:0055114
TraesCS1B02G028400		1B	13672066	13672302												IPR000864, IPR036354	GO:0004857, GO:0004866, GO:0004867, GO:0009611, GO:0061135
TraesCS1B02G028500		1B	13677909	13678139												IPR000864, IPR036354	GO:0004857, GO:0004866, GO:0004867, GO:0009611, GO:0061135
TraesCS1B02G028600		1B	13892597	13899116												IPR001128, IPR002401, IPR017972, IPR036396	GO:0004497, GO:0005506, GO:0016705, GO:0020037, GO:0055114
TraesCS1B02G028700		1B	13965202	13970031
TraesCS1B02G028800		1B	14030108	14031735												IPR002885, IPR011990	GO:0005515
TraesCS1B02G108200	VIN3-like protein 1 [Source:Projected from Arabidopsis thaliana (AT3G24440) UniProtKB/Swiss-Prot;Acc:Q9LHF5]	1B	120404964	120412518	Ta.16935.2.S1_at	20.8944	4.38504	58.5474	5.87153	96.0788	6.58615	87.355	6.44882	59.4002	5.89239	IPR003961, IPR013783, IPR032881, IPR036116	GO:0005515
TraesCS1B02G108300		1B	120416952	120418958												IPR003340, IPR015300, IPR039218	GO:0003677
TraesCS1B02G108400		1B	120468068	120470093												IPR001087, IPR035669, IPR036514	GO:0016788
TraesCS1B02G108500		1B	120642526	120647645												IPR002182, IPR027417, IPR032675, IPR038005, IPR041118	GO:0003700, GO:0004674, GO:0005515, GO:0005524, GO:0005634, GO:0006355, GO:0006468, GO:0006952, GO:0007165, GO:0016705, GO:0030554, GO:0032550, GO:0032559, GO:0043531, GO:0043565, GO:0055114
TraesCS1B02G108600		1B	120654351	120655483												IPR007658
TraesCS1B02G108700		1B	120880607	120882981	Ta.12777.1.S1_at; TaAffx.54601.1.S1_at	122.409	6.93556	672.495	9.39338	756.72	9.56362	734.65	9.52091	715.657	9.48313	IPR008979, IPR012919	GO:0016021
TraesCS1B02G108800		1B	120883891	120888770												IPR002885, IPR011990, IPR033443	GO:0005515, GO:0005739
TraesCS1B02G108900		1B	120992878	121003587												IPR001357, IPR036420
TraesCS1B02G109000		1B	120995533	121009788												IPR003890, IPR003891, IPR016021, IPR016024	GO:0003723, GO:0005515
TraesCS1B02G109100		1B	121009729	121011119												IPR002048, IPR011992, IPR018247, IPR039647	GO:0005509
TraesCS1B02G109200	Pentatricopeptide repeat-containing protein At2g34400 [Source:Projected from Arabidopsis thaliana (AT2G34400) UniProtKB/Swiss-Prot;Acc:O64705]	1B	121013048	121015017												IPR002885, IPR011990	GO:0005515
TraesCS1B02G109300		1B	121178428	121180377												IPR010658, IPR036259
TraesCS1B02G109400		1B	121403988	121406447	TaAffx.84937.1.S1_at	10.2587	3.35878	695.463	9.44183	902.066	9.81709	5972.83	12.5442	3397.41	11.7302	IPR000719, IPR001245, IPR011009	GO:0004672, GO:0005524, GO:0006468, GO:0030554, GO:0032550, GO:0032559
TraesCS1B02G109600	Laccase [Source:UniProtKB/TrEMBL;Acc:A0A341NZX9]	1B	121713741	121716044												IPR001117, IPR002355, IPR008972, IPR011706, IPR011707, IPR017761, IPR033138, IPR034285, IPR034288, IPR034289	GO:0005507, GO:0016491, GO:0046274, GO:0048046, GO:0052716, GO:0055114
TraesCS1B02G109700		1B	121761027	121763665												IPR003653, IPR038765	GO:0006508, GO:0008234
TraesCS1B02G109800		1B	121763672	121770455
TraesCS1B02G109900		1B	121790066	121791256												IPR001810, IPR005174, IPR036047	GO:0005515
TraesCS1B02G110000		1B	122357585	122359585												IPR001810, IPR005174, IPR036047	GO:0005515
TraesCS1B02G258600		1B	455983799	455986097	Ta.15817.1.A1_at	44.7169	5.48275	618.729	9.27316	631.805	9.30334	918.333	9.84287	449.978	8.81371
TraesCS1B02G258700		1B	456184940	456188362												IPR001876, IPR022764, IPR035952, IPR036443	GO:0004252, GO:0016021, GO:0046872
TraesCS1B02G258800		1B	456252451	456255472	TaAffx.12176.1.S1_at	15.9906	3.99915	246.566	7.94583	209.378	7.70996	1360.57	10.41	1386.97	10.4377
TraesCS1B02G258900		1B	456259382	456261621	Ta.25524.1.S1_at	96.5381	6.59303	1669.37	10.7051	1363.12	10.4127	2239.8	11.1292	2058.44	11.0073	IPR001841, IPR013083
TraesCS1B02G259000		1B	456263682	456274343	Ta.7626.2.S1_at; Ta.7626.3.S1_at	208.405	7.70324	895.666	9.80682	932.26	9.86459	951.753	9.89444	715.276	9.48236	IPR002048, IPR011685, IPR011992, IPR018247, IPR033122	GO:0005509, GO:0005739, GO:0005743, GO:0015297, GO:0016020, GO:0016021, GO:0043022, GO:0055085
TraesCS1B02G259100		1B	456432108	456433944												IPR001810, IPR036047	GO:0005515
TraesCS1B02G259200		1B	456711790	456714159												IPR003338, IPR003593, IPR003959, IPR003960, IPR004201, IPR005938, IPR009010, IPR027417, IPR029067, IPR041569	GO:0005524, GO:0016787, GO:0030554, GO:0032550, GO:0032559
TraesCS1B02G259300	Preprotein translocase subunit SCY2, chloroplastic [Source:Projected from Arabidopsis thaliana (AT2G31530) UniProtKB/Swiss-Prot;Acc:F4IQV7]	1B	456728042	456745945												IPR002208, IPR023201	GO:0015031, GO:0016020
TraesCS1B02G259400	CASP-like protein [Source:UniProtKB/TrEMBL;Acc:A0A341P5N5]	1B	456839537	456840289												IPR006459, IPR006702
TraesCS1B02G259500		1B	456974572	456978605												IPR008545
TraesCS1B02G259600		1B	456996535	457003832												IPR001623, IPR036869	GO:0009507
TraesCS1B02G259700		1B	457024724	457026608	TaAffx.109118.1.S1_at	44.9994	5.49183	18.5949	4.21684	11.3889	3.50956	9.66396	3.27261	26.3452	4.71947	IPR002213	GO:0016758, GO:0030554, GO:0032550, GO:0032559
TraesCS1B02G259800	Kinesin-like protein [Source:UniProtKB/TrEMBL;Acc:A0A1D5S611]	1B	457316990	457321795	TaAffx.94395.1.S1_at	7.32188	2.87221	11.0046	3.46003	4.16114	2.05698	2.05305	1.03777	4.82023	2.2691	IPR001752, IPR019821, IPR027417, IPR027640, IPR036961	GO:0003777, GO:0005524, GO:0005874, GO:0007018, GO:0008017, GO:0030554, GO:0032550, GO:0032559, GO:0097367
TraesCS1B02G259900		1B	457321971	457325412												IPR002885, IPR011990	GO:0005515
TraesCS1B02G260000		1B	457378595	457380723												IPR013763, IPR013922, IPR036915	GO:0000079, GO:0019901
TraesCS1B02G260100		1B	457460379	457471725	Ta.6004.1.S1_at; Ta.6004.2.S1_a_at; Ta.6004.2.S1_at; Ta.6004.3.S1_x_at; TaAffx.59289.1.S1_at	51.3606	5.68259	239.404	7.90331	242.782	7.92352	260.524	8.02527	228.704	7.83734	IPR000210, IPR000225, IPR011333, IPR011989, IPR016024	GO:0005515
TraesCS1B02G260200	Hexosyltransferase [Source:UniProtKB/TrEMBL;Acc:A0A341P4L9]	1B	457535859	457536643												IPR002659	GO:0006486, GO:0016020
TraesCS1B02G260300		1B	457750965	457756510												IPR000719, IPR001245, IPR011009, IPR017441	GO:0000166, GO:0001883, GO:0004672, GO:0004674, GO:0005524, GO:0006468, GO:0016020, GO:0016021, GO:0016301, GO:0016310, GO:0016740, GO:0030554, GO:0032550, GO:0032559, GO:0097367
TraesCS1B02G260400		1B	457862771	457866260												IPR002925, IPR029058	GO:0016787
TraesCS1B02G277900		1B	486477519	486480569												IPR002182, IPR027417, IPR038005, IPR041118	GO:0001883, GO:0030554, GO:0032550, GO:0032559, GO:0043531, GO:0097367
TraesCS1B02G278000		1B	486485239	486488059												IPR002182, IPR027417, IPR038005, IPR041118	GO:0030554, GO:0032550, GO:0032559, GO:0043531
TraesCS1B02G278100	Hexosyltransferase [Source:UniProtKB/TrEMBL;Acc:A0A1D5S8E7]	1B	486488222	486490536												IPR002659, IPR025298	GO:0000139, GO:0006486, GO:0008378, GO:0016020, GO:0016021
TraesCS1B02G278200		1B	486544053	486546731	Ta.9470.1.A1_x_at; Ta.9470.2.S1_a_at	397.506	8.63483	3068.46	11.5833	2962.29	11.5325	3083.89	11.5905	3731.7	11.8656	IPR000504, IPR012677, IPR035979	GO:0003676,
TraesCS1B02G278300		1B	486777121	486779644												IPR001623, IPR002939, IPR008971, IPR036869	GO:0006457, GO:0051082
TraesCS1B02G278500		1B	486846591	486849061												IPR006016, IPR014729
TraesCS1B02G278600		1B	486968982	486975788												IPR000595, IPR003938, IPR005821, IPR014710, IPR018490, IPR020683, IPR036770, IPR002110, IPR021789	GO:0005216, GO:0005249, GO:0005515, GO:0006811, GO:0006813, GO:0016020, GO:0016021, GO:0034765, GO:0055085
TraesCS1B02G278700		1B	487011915	487012456
TraesCS1B02G278800		1B	487144453	487145097
TraesCS1B02G278900		1B	487170528	487171191
TraesCS1B02G279000		1B	487405545	487407748												IPR001810, IPR006566, IPR032675, IPR036047	GO:0005515
TraesCS1B02G279100		1B	487425602	487427181	Ta.1020.1.S1_a_at; Ta.1020.2.A1_x_at	2990.87	11.5463	637.564	9.31643	820.274	9.67996	733.764	9.51917	411.144	8.6835	IPR008030, IPR036291
TraesCS1B02G279200		1B	487489192	487496862												IPR001251, IPR009038, IPR011074, IPR036273, IPR036598, IPR036865
TraesCS1B02G279300		1B	487678899	487682502	Ta.11118.1.S1_at	59.8212	5.90259	27.8467	4.79943	107.024	6.74179	111.199	6.797	124.914	6.96479	IPR000008, IPR013583, IPR035892
TraesCS1B02G279400		1B	487950160	487951643	TaAffx.16998.1.A1_at	35.075	5.13237	59.4045	5.8925	55.3558	5.79066	103.252	6.69003	85.1898	6.41261	IPR001005, IPR009057, IPR017930	GO:0003677
TraesCS1B02G279500		1B	488124720	488128277												IPR027417, IPR031314	GO:0030554, GO:0032550, GO:0032559,
TraesCS1B02G279600		1B	488207700	488215642												IPR007700, IPR021864
TraesCS1B02G279700	DAR GTPase 3, chloroplastic [Source:Projected from Arabidopsis thaliana (AT4G02790) UniProtKB/Swiss-Prot;Acc:Q8H1F6]	1B	488215666	488218436	TaAffx.21100.1.S1_at	456.687	8.83506	1966.33	10.9413	2692.12	11.3945	1897.95	10.8902	1402.52	10.4538	IPR006073, IPR019991, IPR023179, IPR027417	GO:0003924, GO:0005525, GO:0009507, GO:0032550
TraesCS1B02G279800	Amidophosphoribosyltransferase [Source:UniProtKB/TrEMBL;Acc:A0A1D6RE22]	1B	488393400	488395445												IPR000836, IPR005854, IPR017932, IPR029055, IPR029057, IPR035584	GO:0004044, GO:0006189, GO:0009113, GO:0009116, GO:0046872, GO:0051536
TraesCS1B02G279900		1B	488395900	488420426												IPR000109, IPR018456, IPR036259	GO:0006857, GO:0016020, GO:0016021, GO:0022857, GO:0055085
TraesCS1B02G315400		1B	539848345	539849489
TraesCS1B02G315436		1B	539870552	539871655												IPR002885, IPR011990	GO:0005515
TraesCS1B02G315437		1B	539871715	539872551												IPR002885, IPR011990	GO:0005515
TraesCS1B02G315500		1B	539932703	539933668												IPR002885, IPR011990	GO:0005515
TraesCS1B02G315508		1B	539931449	539932669												IPR002885, IPR011990	GO:0005515
TraesCS1B02G315600		1B	540136943	540139657												IPR001270, IPR003593, IPR003959, IPR018368, IPR019489, IPR027417, IPR041546	GO:0005524, GO:0030554, GO:0032550, GO:0032559
TraesCS1B02G315700		1B	540154460	540156301	Ta.16559.1.S1_at; Ta.16559.1.S1_x_at	33.8413	5.08071	8.55144	3.09617	23.6207	4.56198	90.2321	6.49557	149.809	7.22698	IPR004263, IPR040911	GO:0006486, GO:0016021, GO:0016757
TraesCS1B02G315800		1B	540298884	540299147
TraesCS1B02G315900	Protein DETOXIFICATION [Source:UniProtKB/TrEMBL;Acc:A0A1D5SAU6]	1B	540313752	540319802	Ta.25708.1.A1_at	80.695	6.33441	1006.76	9.97551	900.239	9.81416	844.985	9.72278	790.288	9.62623	IPR002528	GO:0015238, GO:0015297, GO:0016020, GO:0016021, GO:0042908, GO:0042910, GO:0055085
TraesCS1B02G316000		1B	540365845	540366598	TaAffx.43029.1.S1_x_at	48.9494	5.61322	470.721	8.87873	477.72	8.90002	472.634	8.88458	297.369	8.21611
TraesCS1B02G316100		1B	540718572	540726964													GO:0003735, GO:0005840, GO:0006412, GO:0016021
TraesCS1B02G316200		1B	540718496	540722697	TaAffx.53289.1.S1_x_at	9.8125	3.29462	388.976	8.60354	308.781	8.27044	464.147	8.85844	256.926	8.00521	IPR006447, IPR009057, IPR025756, IPR001005, IPR017930	GO:0003677, GO:0005634
TraesCS1B02G316300		1B	540728727	540731048	Ta.11676.1.A1_at	225.11	7.81449	1741.01	10.7657	1624.16	10.6655	1852.06	10.8549	1444.14	10.496	IPR001841, IPR013083, IPR039525, IPR039738	GO:0061630
TraesCS1B02G316400	NADH-cytochrome b5 reductase [Source:UniProtKB/TrEMBL;Acc:W5A0B7]	1B	540991001	540994324	Ta.27662.1.A1_at; Ta.6627.1.S1_at	515.505	9.00984	2978.36	11.5403	3880.01	11.9218	3854.66	11.9124	4083.46	11.9956	IPR001433, IPR001709, IPR001834, IPR008333, IPR017927, IPR017938, IPR039261	GO:0004128, GO:0016021, GO:0016491, GO:0055114
TraesCS1B02G316500		1B	540999387	541004625	Ta.13967.1.A1_at	34.615	5.11333	662.688	9.37219	450.241	8.81456	468.095	8.87066	489.699	8.93575	IPR000300, IPR005135, IPR036691	GO:0016787, GO:0046856
TraesCS1B02G316600		1B	541006483	541009725												IPR003582, IPR005123, IPR006620, IPR041756	GO:0004177, GO:0005506, GO:0006508, GO:0016491, GO:0016705, GO:0031418, GO:0055114
TraesCS1B02G316700		1B	541010975	541012480												IPR016140, IPR036312, IPR043325
TraesCS1B02G316800		1B	541016416	541019534												IPR004130, IPR027417	GO:0003924, GO:0030554, GO:0032550, GO:0032559
TraesCS1B02G316900		1B	541402409	541402777												IPR000823, IPR002016, IPR010255	GO:0004601, GO:0006979, GO:0020037, GO:0055114
TraesCS1B02G317000		1B	541466983	541469854	Ta.11141.2.S1_a_at; Ta.11141.2.S1_s_at; Ta.11141.3.S1_x_at	3458.37	11.7559	26106.5	14.6721	23994.4	14.5504	15166.1	13.8886	15694.8	13.938	IPR005225, IPR006689, IPR027417	GO:0005525, GO:0032550
TraesCS1B02G317100		1B	542135029	542139174												IPR004827, IPR043452	GO:0003700, GO:0005634, GO:0006355, GO:0009738, GO:0045893
TraesCS1B02G317200	Centromeric histone 3 [Source:UniProtKB/TrEMBL;Acc:I3NV43]	1B	542139503	542142510	TaAffx.48354.1.S1_at	19.7587	4.30442	143.344	7.16334	218.463	7.77125	132.457	7.04938	117.426	6.8756	IPR000164, IPR007125, IPR009072	GO:0000786, GO:0003677, GO:0005634, GO:0005694, GO:0046982
TraesCS1B02G317300		1B	542427479	542430182	TaAffx.128418.49.S1_at	28.0631	4.8106	239.282	7.90257	220.559	7.78502	96.3332	6.58996	79.2347	6.30806	IPR000164, IPR007125, IPR009072	GO:0000786, GO:0003677, GO:0005634, GO:0046982
TraesCS1B02G317400		1B	542574532	542577585												IPR000164, IPR007125, IPR009072	GO:0000786, GO:0003677, GO:0046982
TraesCS1B02G317500	Chlorophyll a-b binding protein, chloroplastic [Source:UniProtKB/TrEMBL;Acc:A0A341P530]	1B	542578994	542580037												IPR001344, IPR022796, IPR023329	GO:0009765, GO:0016020
TraesCS1B02G317600		1B	542581708	542583701												IPR006566, IPR013101, IPR036047	GO:0005515
TraesCS1B02G317700	Photosystem II reaction center protein Z [Source:UniProtKB/Swiss-Prot;Acc:P69695]	1B	542589615	542589803	TaAffx.128712.18.S1_s_at	14151.2	13.7886	161407	17.3003	153250	17.2255	33283.7	15.0225	30698	14.9059	IPR002644, IPR036512	GO:0009507, GO:0009523, GO:0009535, GO:0009536, GO:0009539, GO:0009579, GO:0015979, GO:0016020, GO:0016021, GO:0042549
TraesCS1B02G317800		1B	542626900	542630394												IPR006566, IPR032675, IPR036047	GO:0005515
TraesCS1B02G317900		1B	542713968	542716020												IPR006566, IPR032675, IPR036047	GO:0005515
TraesCS1B02G318000		1B	542921591	542925335												IPR000719, IPR002048, IPR008271, IPR011009, IPR011992, IPR017441, IPR018247	GO:0001882, GO:0001883, GO:0004672, GO:0005509, GO:0005524, GO:0006468, GO:0030554, GO:0032550, GO:0032553, GO:0032555, GO:0032559, GO:0097367
TraesCS1B02G318100		1B	542926216	542928863	Ta.3295.1.A1_at	23.0569	4.52713	118.38	6.88729	169.657	7.40647	138.318	7.11184	108.145	6.75682	IPR018034, IPR024626	GO:0030554, GO:0032550, GO:0032559,
TraesCS1B02G318200		1B	542929054	542931287	Ta.2153.1.S1_s_at	2518.97	11.2986	7233.35	12.8204	9709.65	13.2452	10705.6	13.3861	9433.76	13.2036	IPR004038, IPR022991, IPR029064, IPR039109	GO:0003723, GO:0003735, GO:0005840, GO:0006412, GO:0022625, GO:0030554, GO:0032550, GO:0032559
TraesCS1B02G318300		1B	542957820	542958503												IPR040361
TraesCS1B02G318400		1B	543009710	543016399	Ta.3225.1.S1_at; Ta.3225.1.S1_x_at; Ta.3225.2.S1_a_at	325.331	8.34576	3425.01	11.7419	3202.27	11.6449	3270.74	11.6754	3724.73	11.8629	IPR012936, IPR039542	GO:0016021
TraesCS1B02G318500		1B	543020272	543022263												IPR036047	GO:0005515
TraesCS1B02G318600		1B	543081634	543084208
TraesCS1B02G318700		1B	543085808	543089548	TaAffx.84220.1.S1_at	11.67	3.54473	55.026	5.78204	60.8835	5.92798	61.1543	5.93438	48.6438	5.60418
TraesCS1B02G318800		1B	543178343	543183999	TaAffx.117149.1.S1_at	15.2406	3.92985	97.772	6.61135	23.0187	4.52473	26.8001	4.74417	46.1064	5.5269	IPR001005, IPR009057, IPR017930,	GO:0003677,
TraesCS1B02G318900		1B	543428313	543429542												IPR006076, IPR036188	GO:0016491, GO:0055114
TraesCS1B02G319000		1B	543466732	543471760												IPR001214, IPR003105, IPR007728, IPR015947, IPR025794, IPR036987	GO:0005515, GO:0005634, GO:0005694, GO:0008270, GO:0016571, GO:0018024, GO:0034968
TraesCS1B02G319100	Proteasome subunit alpha type [Source:UniProtKB/TrEMBL;Acc:W5AEN0]	1B	543473770	543477325	Ta.14393.1.S1_at	513.329	9.00374	2314.83	11.1767	3154.55	11.6232	2811.26	11.457	3457.98	11.7557	IPR000426, IPR001353, IPR023332, IPR029055	GO:0000502, GO:0004175, GO:0004298, GO:0005634, GO:0005737, GO:0005839, GO:0006508, GO:0006511, GO:0008233, GO:0010498, GO:0010499, GO:0016787, GO:0019773, GO:0043161, GO:0051603
TraesCS1B02G319200		1B	543479995	543480674													GO:0016021
TraesCS1B02G319300		1B	543495886	543496739	Ta.16742.1.S1_at	77.2481	6.27143	98.0533	6.61549	275.255	8.10462	356.588	8.47811	319.785	8.32096	IPR002048, IPR011992, IPR018247	GO:0005509
TraesCS1B02G319400		1B	543497338	543502285	Ta.1018.1.S1_x_at	1929.88	10.9143	4231.41	12.0469	4502.48	12.1365	3936.77	11.9428	4060.31	11.9874	IPR002048, IPR011992, IPR018247, IPR039030	GO:0005509, GO:0005737, GO:0019722, GO:0019904, GO:0046872
TraesCS1B02G319500		1B	543580096	543581165												IPR013210, IPR032675
TraesCS1B02G319600		1B	543600893	543603697	TaAffx.69493.1.S1_at	27.6219	4.78774	51.4292	5.68452	76.8969	6.26485	71.6205	6.1623	73.5783	6.20121	IPR013210, IPR032675
TraesCS1B02G319700		1B	543739662	543741087	Ta.13838.1.S1_at	13.2206	3.72472	43.5533	5.44471	8.71672	3.12379	18.9192	4.24178	14.9481	3.90189	IPR001611, IPR013210, IPR032675	GO:0004857, GO:0005515
TraesCS1B02G319800		1B	543843642	543844013	Ta.12806.1.A1_at; Ta.12806.1.A1_s_at	77.32	6.27277	453.743	8.82573	470.477	8.87798	597.261	9.22222	446.475	8.80244
TraesCS1B02G319900		1B	543903417	543905433												IPR001611, IPR013210, IPR032675	GO:0005515
TraesCS1B02G324700		1B	550035594	550036190												IPR003245, IPR008972, IPR039391	GO:0009055
TraesCS1B02G324800		1B	550438835	550439098
TraesCS1B02G324900		1B	550681009	550681299
TraesCS1B02G325000		1B	551008224	551010567												IPR039292	GO:0000398, GO:0035196, GO:1903730
TraesCS1B02G325100	Phosphoglycerate kinase [Source:UniProtKB/TrEMBL;Acc:A0A1D6RDZ8]	1B	551011062	551014062	Ta.2307.1.S1_at	8787.98	13.1013	54920.2	15.745	35229.4	15.1045	14054.2	13.7787	11241.5	13.4565	IPR001576, IPR015824, IPR015911, IPR036043	GO:0004618, GO:0006096, GO:0030554, GO:0032550, GO:0032559
TraesCS1B02G325200		1B	551025197	551029011												IPR003690, IPR038538	GO:0003690, GO:0006355
TraesCS1B02G325300		1B	551032279	551033481	Ta.22232.1.S1_at	20.4144	4.35151	158.874	7.31174	185.58	7.5359	228.626	7.83685	218.746	7.77311	IPR000626, IPR019954, IPR019956, IPR029071	GO:0005515
TraesCS1B02G325400		1B	551116010	551117322												IPR013087, IPR036236	GO:0003676
TraesCS1B02G325500		1B	551176541	551183821	Ta.18489.1.S1_a_at	35.8844	5.16528	323.23	8.33642	326.392	8.35046	439.562	8.77992	408.525	8.67428
TraesCS1B02G325700		1B	551229102	551230640													GO:0015081,
TraesCS1B02G325800		1B	551231076	551234041
TraesCS1B02G325900		1B	551238228	551239019
TraesCS1B02G326000		1B	551497430	551498613
TraesCS1B02G326100		1B	551720339	551725340												IPR000719, IPR011009, IPR030616, IPR008271, IPR017441	GO:0000226, GO:0000278, GO:0004672, GO:0004674, GO:0005524, GO:0006468, GO:0007059, GO:0030554, GO:0032465, GO:0032550, GO:0032559
TraesCS1B02G326200		1B	551759481	551761446
TraesCS1B02G326300	Cytochrome b6-f complex subunit 6 [Source:UniProtKB/TrEMBL;Acc:A0A341SH95]	1B	551766799	551766894												IPR007802	GO:0009055, GO:0009512, GO:0009579, GO:0016020, GO:0016021, GO:0022900, GO:0055114
TraesCS1B02G326400	Structural maintenance of chromosomes protein [Source:UniProtKB/TrEMBL;Acc:W4ZZM2]	1B	551857559	551868376	Ta.6708.1.A1_at; Ta.6708.2.S1_at; Ta.6708.3.S1_at; Ta.7603.1.A1_at	12.1752	3.60587	32.555	5.02481	107.352	6.74621	54.8686	5.77791	52.8234	5.7231	IPR003395, IPR010935, IPR024704, IPR027417, IPR036277, IPR041738	GO:0005515, GO:0005524, GO:0005634, GO:0005694, GO:0030554, GO:0032550, GO:0032559, GO:0051276, GO:0097367
TraesCS1B02G326500		1B	551869725	551870279												IPR001471, IPR016177, IPR036955	GO:0003677, GO:0003700, GO:0005634, GO:0006351, GO:0006355
TraesCS1B02G332500		1B	558997841	559003830												IPR011598, IPR036638	GO:0046983
TraesCS1B02G332600	Potassium transporter [Source:UniProtKB/TrEMBL;Acc:A0A341P7C4]	1B	559092320	559097912												IPR003855	GO:0015079, GO:0016020, GO:0071805
TraesCS1B02G332700		1B	559100572	559104015	Ta.14435.1.S1_at	1511.6	10.5619	9496.72	13.2132	9229.1	13.172	7723.58	12.9151	5468.41	12.4169	IPR005025, IPR008254, IPR010089, IPR029039	GO:0003955, GO:0010181, GO:0016491, GO:0055114, GO:0097367
TraesCS1B02G332800		1B	559334072	559335322
TraesCS1B02G332900		1B	559342049	559343002												IPR000812, IPR013137, IPR013150, IPR013763, IPR023486, IPR036915	GO:0006355, GO:0017025, GO:0046872, GO:0070897
TraesCS1B02G333000		1B	559569985	559570938												IPR000812, IPR013137, IPR013150, IPR013763, IPR023486, IPR036915	GO:0006355, GO:0017025, GO:0070897
TraesCS1B02G333100		1B	559574501	559579478	Ta.15837.1.S1_at; TaAffx.23449.1.S1_at	16.2503	4.0224	95.9201	6.58376	86.7059	6.43806	99.3524	6.63448	86.7127	6.43817	IPR004000, IPR030054, IPR043129	GO:0005634, GO:0006338
TraesCS1B02G333200		1B	559585967	559586569												IPR013126, IPR018181, IPR043129	GO:0030554, GO:0032550, GO:0032559, GO:0097367,
TraesCS1B02G333300	Serine/threonine-protein kinase [Source:UniProtKB/TrEMBL;Acc:A0A1D5SGA0]	1B	559962224	559969037												IPR000719, IPR000742, IPR000858, IPR001245, IPR001480, IPR003609, IPR008271, IPR011009, IPR024171, IPR036426	GO:0004672, GO:0004674, GO:0005524, GO:0006468, GO:0016021, GO:0030554, GO:0032550, GO:0032559, GO:0048544
TraesCS1B02G333400		1B	560015635	560017859
TraesCS1B02G333500		1B	560018875	560021191												IPR001810, IPR013187, IPR017451, IPR036047	GO:0005515
TraesCS1B02G333600		1B	560175742	560178662	Ta.25408.1.S1_at	191.49	7.58113	342.501	8.41997	334.216	8.38464	337.279	8.3978	381.547	8.57572	IPR006015, IPR006016, IPR014729
TraesCS1B02G333800		1B	560251351	560254518												IPR001087, IPR035669, IPR036514	GO:0016788
TraesCS1B02G334000		1B	561255730	561257270												IPR040356	GO:0003700
TraesCS1B02G334100		1B	561494312	561499985												IPR000595, IPR005821, IPR014710, IPR018490	GO:0005216, GO:0006811, GO:0016020, GO:0016021, GO:0030554, GO:0032559, GO:0055085
TraesCS1B02G334200		1B	561504293	561507903	Ta.8606.1.S1_at	306.931	8.26177	1337.66	10.3855	1090.02	10.0901	1213.3	10.2447	1928.35	10.9132	IPR002123, IPR032098	GO:0016021, GO:0016746
TraesCS1B02G334300		1B	561526562	561527110												IPR010666	GO:0008270
TraesCS1B02G334400		1B	561551803	561552693												IPR001841, IPR013083
TraesCS1B02G334500		1B	561642910	561646100	Ta.14673.1.S1_at; Ta.14673.1.S1_x_at	141.318	7.1428	1225.2	10.2588	1396.41	10.4475	1151.34	10.1691	902.745	9.81817		GO:0016021
TraesCS1B02G334600		1B	561702640	561711639	Ta.10534.1.S1_a_at; Ta.10534.2.S1_x_at	218.782	7.77335	2793.37	11.4478	3226.57	11.6558	3321.08	11.6974	3304.68	11.6903	IPR011659, IPR001375, IPR002471, IPR029058	GO:0004252, GO:0006508, GO:0008236,
TraesCS1B02G334605		1B	561700261	561701307												IPR002182, IPR027417, IPR032675, IPR036388	GO:0043531
TraesCS1B02G334700		1B	561711771	561713357												IPR002885, IPR011990	GO:0005515
TraesCS1B02G334800		1B	561720595	561721654
TraesCS1B02G334900		1B	561752758	561754260												IPR001087, IPR035669, IPR036514	GO:0016021, GO:0016788
TraesCS1B02G335000		1B	562374379	562378608												IPR007504, IPR009000, IPR038664, IPR040309	GO:0000493, GO:0001522, GO:0003723, GO:0005732, GO:0042254
TraesCS1B02G335100		1B	562432802	562433838												IPR001471, IPR016177, IPR036955	GO:0003677, GO:0003700, GO:0005634, GO:0006351, GO:0006355
TraesCS1B02G335200		1B	562455259	562456849												IPR027417, IPR041118
TraesCS1B02G335300		1B	562457835	562460559												IPR027417
TraesCS1B02G335400		1B	562468353	562469855												IPR027417
TraesCS1B02G335500		1B	562471622	562473650												IPR027417, IPR041118
TraesCS1B02G335600		1B	562474343	562475800												IPR027417
TraesCS1B02G335700		1B	562484122	562485898												IPR027417
TraesCS1B02G335800		1B	562488652	562490542												IPR027417
TraesCS1B02G335900	Glycosyltransferase [Source:UniProtKB/TrEMBL;Acc:A0A1D5S8T8]	1B	562563326	562564880												IPR002213, IPR035595	GO:0016758
TraesCS1B02G336000	Secretory carrier-associated membrane protein [Source:UniProtKB/TrEMBL;Acc:W5A2E4]	1B	562888965	562898423	Ta.10284.1.S1_a_at; Ta.10284.2.S1_a_at	378.858	8.56551	465.204	8.86172	470.363	8.87763	489.148	8.93413	431.169	8.75211	IPR007273	GO:0000139, GO:0005794, GO:0005886, GO:0015031, GO:0016020, GO:0016021, GO:0030658, GO:0031410, GO:0032588, GO:0055038
TraesCS1B02G336200		1B	563025033	563025878
TraesCS1B02G336300		1B	563027538	563031942	Ta.19092.1.S1_at; Ta.19092.1.S1_x_at	941.215	9.87838	18139	14.1468	17753.5	14.1158	11939.9	13.5435	12952.2	13.6609	IPR005117, IPR006066, IPR006067, IPR011787, IPR036136	GO:0016491, GO:0020037, GO:0050311, GO:0051536, GO:0051539, GO:0055114
TraesCS1B02G337900		1B	565848891	565852027
TraesCS1B02G338000		1B	565919590	565920309													GO:0016021
TraesCS1B02G338100		1B	566183644	566184287
TraesCS1B02G338200		1B	566250681	566251163
TraesCS1B02G338400		1B	566449681	566449932
TraesCS1B02G338500	At1g09850 [Source:Projected from Arabidopsis thaliana (AT1G09850) UniProtKB/TrEMBL;Acc:Q0WVJ5]	1B	566601144	566605225	TaAffx.131344.1.S1_at	95.6012	6.57896	423.602	8.72657	397.833	8.63602	620.444	9.27716	1164.08	10.185	IPR000118, IPR000169, IPR000668, IPR013201, IPR025660, IPR025661, IPR037277, IPR038765, IPR039417	GO:0005773, GO:0005783, GO:0006508, GO:0008234
TraesCS1B02G338600		1B	566605390	566608558	Ta.29591.1.S1_at	84.5563	6.40184	1176.59	10.2004	1689.87	10.7227	1039.71	10.022	1128.87	10.1407	IPR001229, IPR033734, IPR036404	GO:0030246
TraesCS1B02G338700		1B	566610765	566611052												IPR003340, IPR015300	GO:0003677
TraesCS1B02G338800	Thioredoxin H-type [Source:UniProtKB/Swiss-Prot;Acc:O64394]	1B	566685128	566687824												IPR013766, IPR017937, IPR036249	GO:0005737, GO:0006662, GO:0015035, GO:0045454, GO:0055114
TraesCS1B02G338900		1B	566720877	566721457
TraesCS1B02G339000	Thioredoxin [Source:UniProtKB/TrEMBL;Acc:W5A566]	1B	566823400	566831663												IPR005746, IPR013766, IPR017937, IPR036249	GO:0005623, GO:0006662, GO:0015035, GO:0045454
TraesCS1B02G339100		1B	566831774	566836406	TaAffx.80676.1.S1_at	29.5675	4.88594	54.9619	5.78036	78.3853	6.29251	46.3636	5.53492	46.3568	5.53471	IPR010488, IPR027417	GO:0001883, GO:0005524, GO:0016301, GO:0030554, GO:0032550, GO:0032559, GO:0097367
TraesCS1B02G339200		1B	566836971	566849058	TaAffx.257.1.A1_at	117.129	6.87196	463.197	8.85548	440.511	8.78303	578.465	9.17609	446.626	8.80292	IPR002083, IPR008974	GO:0005515
TraesCS1B02G339300		1B	566954050	566956934												IPR007658, IPR025315	GO:0016021
TraesCS1B02G339400		1B	566978051	566980638												IPR002222, IPR005713, IPR020934, IPR023575	GO:0003723, GO:0003735, GO:0005840, GO:0006412, GO:0015935
TraesCS1B02G339500		1B	566981016	566981812	Ta.17487.1.S1_at	114.237	6.83589	1077.52	10.0735	837.88	9.7106	386.757	8.59528	473.468	8.88712	IPR009806	GO:0009507, GO:0009523, GO:0015979, GO:0016021
TraesCS1B02G339600		1B	567113505	567116436												IPR010719, IPR029063
TraesCS1B02G339700		1B	567206790	567207651												IPR009806	GO:0009507, GO:0009523, GO:0015979, GO:0016021
TraesCS1B02G339800		1B	567712292	567715087												IPR032675	GO:0030554, GO:0032550, GO:0032559, GO:0043531,
TraesCS1B02G418000		1B	642121421	642123110
TraesCS1B02G418100		1B	642158205	642174086												IPR001611, IPR002182, IPR003591, IPR006553, IPR027417, IPR032675, IPR041118	GO:0005515, GO:0030554, GO:0032550, GO:0032559, GO:0043531
TraesCS1B02G418200		1B	642175952	642176781												IPR041118
TraesCS1B02G418300		1B	642193392	642201716												IPR001611, IPR002182, IPR003591, IPR006553, IPR027417, IPR032675, IPR041118	GO:0005515, GO:0030554, GO:0032550, GO:0032559, GO:0043531
TraesCS1B02G418400	Auxin-responsive protein [Source:UniProtKB/TrEMBL;Acc:A0A341PC77]	1B	642391305	642393424	Ta.674.3.S1_a_at	49.1856	5.62016	459.074	8.84258	408.929	8.67571	726.218	9.50426	533.883	9.06038	IPR000270, IPR003311, IPR033389	GO:0005515, GO:0005634, GO:0006355
TraesCS1B02G418500	Glutamate receptor [Source:UniProtKB/TrEMBL;Acc:A0A341PAA0]	1B	642470698	642475459												IPR001320, IPR001638, IPR001828, IPR017103, IPR028082, IPR019594	GO:0004970, GO:0015276, GO:0016020
TraesCS1B02G418600		1B	642476197	642479409												IPR008479, IPR038925
TraesCS1B02G418700		1B	642488721	642489679												IPR013187
TraesCS1B02G418800		1B	642495688	642496786												IPR006461	GO:0016021
TraesCS1B02G418900		1B	642526977	642529027												IPR002347, IPR020904, IPR036291	GO:0016491
TraesCS1B02G419000		1B	642637138	642639717												IPR002347, IPR020904, IPR036291	GO:0016491
TraesCS1B02G419100	Glycosyltransferases [Source:UniProtKB/TrEMBL;Acc:W5A0M7]	1B	642674872	642679222	Ta.11822.1.S1_at	66.1513	6.0477	188.931	7.56171	199.103	7.63737	156.429	7.28936	180.533	7.49612	IPR005027, IPR029044	GO:0000139, GO:0015018, GO:0016020, GO:0016021, GO:0071555
TraesCS1B02G419200		1B	642698683	642701467												IPR003338, IPR003593, IPR003959, IPR003960, IPR004201, IPR005938, IPR009010, IPR027417, IPR029067, IPR041569	GO:0005524, GO:0016787, GO:0030554, GO:0032550, GO:0032559
TraesCS1B02G419300		1B	642791915	642793468												IPR000719, IPR011009, IPR017441	GO:0004672, GO:0005524, GO:0006468, GO:0030554, GO:0032550, GO:0032559, GO:0097367
TraesCS1B02G419400		1B	642802707	642811316												IPR000719, IPR011009	GO:0004672, GO:0005524, GO:0006468, GO:0030554, GO:0032550, GO:0032559, GO:0097367
TraesCS1B02G419500		1B	642966490	642970060												IPR002347, IPR020904, IPR036291	GO:0016491
TraesCS1B02G419600		1B	642990657	642991055												IPR000719, IPR011009	GO:0004672, GO:0005524, GO:0006468, GO:0030554, GO:0032550, GO:0032559
TraesCS1B02G419700		1B	643058271	643061439												IPR007658, IPR025315	GO:0016021
TraesCS1B02G419800	Golgin Putative 5 [Source:Projected from Arabidopsis thaliana (AT1G79830) UniProtKB/TrEMBL;Acc:F4HQB9]	1B	643093812	643104499	Ta.15945.1.S1_at; Ta.29565.1.S1_at	116.693	6.86658	400.536	8.64579	447.669	8.80629	492.331	8.94348	411.301	8.68405	IPR022091, IPR022092	GO:0005634, GO:0005794,
TraesCS1B02G419900		1B	643112123	643114747												IPR000719, IPR008271, IPR011009	GO:0004672, GO:0005524, GO:0006468, GO:0030554, GO:0032550, GO:0032559, GO:0097367
TraesCS1B02G420000		1B	643174307	643178268	Ta.22381.1.S1_at	46.9331	5.55253	222.6	7.79831	162.814	7.34708	362.488	8.50179	537.817	9.07097	IPR003829, IPR008778, IPR011051, IPR014710
TraesCS1B02G420100	Photosystem I reaction center subunit VI, chloroplast precursor (PSI- H) (Light-harvesting complex I 11 kDa protein) (GOS5 protein) [Source: Projected from Oryza sativa (Os05g0560000)]	1B	643245972	643246857												IPR004928	GO:0009522, GO:0009538, GO:0015979
TraesCS1B02G420200		1B	643247121	643250796												IPR005512, IPR038937	GO:0005089
TraesCS1B02G420300		1B	643278391	643279367	Ta.5753.1.S1_at	42.2556	5.40107	128.038	7.00043	121.412	6.92376	75.0814	6.23038	48.4364	5.59802	IPR025422	GO:0006351, GO:0043565, GO:0080167
TraesCS1B02G420400		1B	643490606	643496220	Ta.25981.1.A1_at	16.4181	4.03722	92.1603	6.52607	61.0277	5.93139	256.268	8.00151	327.062	8.35342	IPR002182, IPR027417, IPR032675, IPR038005, IPR041118	GO:0003700, GO:0004674, GO:0005515, GO:0005524, GO:0005634, GO:0006355, GO:0006468, GO:0006952, GO:0007165, GO:0030554, GO:0032550, GO:0032559, GO:0043531, GO:0043565, GO:0097367
TraesCS1B02G420500		1B	643559886	643568351
TraesCS1B02G420600		1B	643587156	643590805	Ta.22745.1.S1_at; Ta.22745.2.S1_s_at	587.129	9.19753	7380.28	12.8495	6307.87	12.6229	5222.75	12.3506	5558.87	12.4406	IPR000608, IPR016135, IPR023313	GO:0005524, GO:0016021, GO:0016740
TraesCS1B02G420700		1B	643906713	643908426												IPR005123, IPR026992, IPR027443	GO:0016491, GO:0046872, GO:0055114
TraesCS1B02G437100		1B	659988745	659989632
TraesCS1B02G437200		1B	660011579	660013626												IPR001810, IPR011043, IPR036047	GO:0005515
TraesCS1B02G437300		1B	660083576	660084400												IPR001810, IPR036047	GO:0005515
TraesCS1B02G437400		1B	660100325	660102116	TaAffx.16664.1.A1_at; TaAffx.16664.2.S1_at	100.015	6.64407	154.892	7.27512	98.501	6.62207	263.911	8.04391	176.719	7.46531
TraesCS1B02G437500		1B	660104843	660106905	TaAffx.10453.1.S1_s_at	48.9456	5.61311	163.409	7.35234	102.21	6.6754	90.9036	6.50627	91.4683	6.5152	IPR002347, IPR036291
TraesCS1B02G437600		1B	660107574	660111012	Ta.12039.1.A1_at	1071.48	10.0654	20782.1	14.3431	19161.9	14.226	7667.84	12.9046	8492.27	13.0519	IPR001478, IPR001940, IPR009003, IPR036034, IPR043504	GO:0004252, GO:0005515, GO:0006508
TraesCS1B02G437700		1B	660453629	660455723	Ta.13786.1.S1_s_at	37.3231	5.222	593.899	9.21407	618.715	9.27313	895.783	9.80701	779.17	9.60579	IPR006566, IPR032675, IPR036047	GO:0005515
TraesCS1B02G437800		1B	660459929	660461815												IPR006566
TraesCS1B02G437900		1B	660465254	660466294												IPR001611, IPR013210, IPR032675	GO:0005515
TraesCS1B02G438000		1B	660467100	660467669												IPR001611, IPR032675	GO:0005515
TraesCS1B02G438100		1B	660528237	660529694	TaAffx.78511.1.S1_at	28.0763	4.81128	280.261	8.13062	335.219	8.38896	434.474	8.76313	318.081	8.31325	IPR032675	GO:0030554, GO:0032550, GO:0032559, GO:0097367,
TraesCS1B02G438200		1B	660638917	660640377												IPR032675	GO:0001883, GO:0030554, GO:0032550, GO:0032559, GO:0097367,
TraesCS1B02G438300		1B	660649935	660653024												IPR002182, IPR027417, IPR038005, IPR041118	GO:0030554, GO:0032550, GO:0032559, GO:0043531
TraesCS1B02G438400		1B	660721200	660721859													GO:0005515, GO:0005524, GO:0005737, GO:0005886, GO:0006915, GO:0007165, GO:0009409, GO:0009626, GO:0009814, GO:0012505, GO:0016021, GO:0017111, GO:0030554, GO:0032550, GO:0032559, GO:0043531, GO:0046713,
TraesCS1B02G438500		1B	660722153	660726060												IPR002182, IPR027417, IPR032675, IPR038005, IPR041118	GO:0001882, GO:0001883, GO:0005515, GO:0005524, GO:0005737, GO:0005886, GO:0006915, GO:0007165, GO:0009409, GO:0009626, GO:0009814, GO:0012505, GO:0016021, GO:0017111, GO:0030554, GO:0032550, GO:0032553, GO:0032555, GO:0032559, GO:0043531, GO:0046713, GO:0097367
TraesCS1B02G438600		1B	660743867	660749610												IPR002182, IPR027417, IPR032675, IPR038005, IPR041118	GO:0005515, GO:0005524, GO:0005737, GO:0005886, GO:0006915, GO:0007165, GO:0009409, GO:0009626, GO:0009814, GO:0012505, GO:0016021, GO:0017111, GO:0030554, GO:0032550, GO:0032559, GO:0043531, GO:0046713
TraesCS1B02G438800		1B	660878247	660882222												IPR002182, IPR027417, IPR032675, IPR038005, IPR041118	GO:0001883, GO:0005515, GO:0005524, GO:0005737, GO:0005886, GO:0006915, GO:0007165, GO:0009409, GO:0009626, GO:0009814, GO:0012505, GO:0016021, GO:0017111, GO:0030554, GO:0032550, GO:0032559, GO:0043531, GO:0046713, GO:0097367
TraesCS1B02G438900		1B	660894904	660897261	Ta.13599.1.A1_at	7.40437	2.88838	70.9268	6.14826	42.9224	5.42366	55.8603	5.80375	68.4317	6.09659	IPR006566, IPR036047	GO:0005515
TraesCS1B02G439000		1B	660899214	660901577												IPR001611, IPR003591, IPR013210, IPR032675	GO:0005515
TraesCS1B02G439100		1B	660914516	660916771												IPR002182, IPR027417, IPR038005, IPR041118	GO:0005515, GO:0005524, GO:0005737, GO:0005886, GO:0006915, GO:0007165, GO:0009409, GO:0009626, GO:0009814, GO:0012505, GO:0016021, GO:0017111, GO:0030554, GO:0032550, GO:0032559, GO:0043531, GO:0046713
TraesCS1B02G439200		1B	660961900	660966574	TaAffx.119373.1.A1_at; TaAffx.119493.1.S1_at	7.90844	2.98339	32.3859	5.01729	31.0493	4.95649	196.956	7.62173	120.59	6.91396	IPR002182, IPR027417, IPR032675, IPR038005, IPR041118	GO:0003700, GO:0004674, GO:0005515, GO:0005524, GO:0005634, GO:0005737, GO:0005886, GO:0006355, GO:0006468, GO:0006915, GO:0007165, GO:0009409, GO:0009626, GO:0009814, GO:0012505, GO:0016021, GO:0017111, GO:0030554, GO:0032550, GO:0032559, GO:0043531, GO:0043565, GO:0046713
TraesCS1B02G439300		1B	661052702	661061892												IPR002182, IPR027417, IPR032675, IPR038005, IPR041118	GO:0005515, GO:0005524, GO:0005737, GO:0005886, GO:0006915, GO:0007165, GO:0009409, GO:0009626, GO:0009814, GO:0012505, GO:0016021, GO:0017111, GO:0030554, GO:0032550, GO:0032559, GO:0043531, GO:0046713
TraesCS1B02G439400		1B	661119488	661124710												IPR002182, IPR027417, IPR032675, IPR038005, IPR041118	GO:0005515, GO:0005524, GO:0005737, GO:0005886, GO:0006915, GO:0007165, GO:0009409, GO:0009626, GO:0009814, GO:0012505, GO:0016021, GO:0017111, GO:0030554, GO:0032550, GO:0032559, GO:0043531, GO:0046713, GO:0097367
TraesCS1B02G439500		1B	661134254	661135944												IPR001810, IPR036047	GO:0005515
TraesCS1B02G439600	timeless family protein [Source:Projected from Arabidopsis thaliana (AT5G52910) TAIR;Acc:AT5G52910]	1B	661496445	661507957												IPR006906
TraesCS1B02G439700		1B	661508585	661509837	TaAffx.6495.1.S1_at	90.29	6.49649	560.738	9.13118	612.928	9.25957	801.943	9.64736	629.776	9.29869	IPR021489
TraesCS1B02G439800		1B	661513720	661517051	Ta.13357.1.A1_at; Ta.13357.2.S1_at	54.8022	5.77616	707.943	9.46749	568.184	9.15021	787.463	9.62107	424.109	8.72829	IPR004827, IPR012900	GO:0003700, GO:0006355
TraesCS1B02G440000		1B	661626770	661627420												IPR003245, IPR008972, IPR039391	GO:0009055, GO:0016021
TraesCS1B02G440100		1B	661630820	661631690												IPR003245, IPR008972, IPR028871, IPR039391	GO:0009055
TraesCS1B02G440200		1B	661895379	661897297	TaAffx.110503.1.S1_at	117.405	6.87535	312.819	8.28918	254.649	7.99236	212.427	7.73083	220.524	7.78479	IPR021099, IPR040293
TraesCS1B02G440300		1B	661929604	661930887												IPR003657, IPR036576	GO:0003677, GO:0003700, GO:0005634, GO:0006355, GO:0043565
TraesCS1B02G442800		1B	664016585	664018112												IPR002921, IPR029058, IPR033556	GO:0006629, GO:0008970
TraesCS1B02G442900		1B	664042281	664043525												IPR001810, IPR036047	GO:0005515
TraesCS1B02G443000		1B	664050719	664051963												IPR001810, IPR036047	GO:0005515
TraesCS1B02G443100	GTP-binding nuclear protein [Source:UniProtKB/TrEMBL;Acc:Q944C6]	1B	664285295	664288021	Ta.2777.2.S1_a_at	2277.82	11.1534	22142	14.4345	21709.8	14.4061	12576.9	13.6185	13056.2	13.6724	IPR001806, IPR002041, IPR005225, IPR027417	GO:0000054, GO:0000166, GO:0003924, GO:0005525, GO:0005634, GO:0005737, GO:0006606, GO:0006913, GO:0015031, GO:0032550, GO:0097367
TraesCS1B02G443300		1B	664317692	664320649												IPR002921, IPR029058, IPR033556	GO:0006629, GO:0008970
TraesCS1B02G443400	Sulfotransferase [Source:UniProtKB/TrEMBL;Acc:A0A1D5S905]	1B	664610425	664611766												IPR000863, IPR027417	GO:0008146
TraesCS1B02G443500		1B	664761662	664762985
TraesCS1B02G443600		1B	664785872	664789375												IPR002885, IPR011990, IPR032867	GO:0005515, GO:0008270
TraesCS1B02G443700		1B	664799757	664806046	Ta.1047.2.S1_a_at; Ta.1047.3.S1_a_at	104.236	6.70371	1429.59	10.4814	1717.96	10.7465	1336.4	10.3841	1378.89	10.4293	IPR000120, IPR023631, IPR036928	GO:0004040
TraesCS1B02G443800		1B	664807427	664809280	TaAffx.121560.1.S1_at	23.2181	4.53718	7.64894	2.93526	20.4435	4.35357	42.2948	5.40241	10.0946	3.33551	IPR005202
TraesCS1B02G443900	Proteasome subunit beta type [Source:UniProtKB/TrEMBL;Acc:A0A1D5SI36]	1B	664952324	664955648	Ta.3303.1.S1_at	187.463	7.55046	1638.24	10.6779	1731.61	10.7579	1470.22	10.5218	1690.54	10.7233	IPR000243, IPR001353, IPR016050, IPR023333, IPR029055	GO:0004175, GO:0004298, GO:0005634, GO:0005737, GO:0005839, GO:0051603
TraesCS1B02G444000		1B	664976146	664977050
TraesCS1B02G444100		1B	665022016	665022492
TraesCS1B02G444200		1B	665027183	665028003												IPR008480
TraesCS1B02G444300		1B	665031898	665032494												IPR008480
TraesCS1B02G444400		1B	665048439	665050304												IPR000571, IPR036855	GO:0046872
TraesCS1B02G444500		1B	665060191	665062366												IPR000571, IPR036855	GO:0046872
TraesCS1B02G444600		1B	665064888	665066503												IPR005123, IPR027443	GO:0016491, GO:0046872, GO:0055114
TraesCS1B02G444700		1B	665099103	665100093
TraesCS1B02G444800		1B	665112752	665113618												IPR005174
TraesCS1B02G444900		1B	665130695	665131411												IPR006040, IPR006041	GO:0005615
TraesCS1B02G445000		1B	665273729	665278609	TaAffx.80175.1.S1_at	20.3081	4.34399	8.2352	3.0418	4.88514	2.2884	5.19753	2.37783	2.56161	1.35705	IPR004839, IPR015421, IPR015422, IPR015424	GO:0003824, GO:0009058, GO:0030170
TraesCS1B02G445100		1B	665291797	665292300												IPR000136	GO:0012511, GO:0016021
TraesCS1B02G445200	Hydroxyproline-rich glycoprotein family protein [Source:Projected from Arabidopsis thaliana (AT3G25690) UniProtKB/TrEMBL;Acc:A0A1I9LT48]	1B	665309787	665314775	TaAffx.109309.1.S1_at	104.923	6.71319	300.079	8.2292	229.567	7.84277	193.15	7.59358	157.15	7.296	IPR040265	GO:0005179, GO:0005576
TraesCS1B02G445300		1B	665397447	665402571	Ta.30636.1.S1_at	5.06562	2.34074	93.1862	6.54204	79.3352	6.30989	75.6101	6.24051	82.2094	6.36123	IPR000719, IPR003527, IPR011009, IPR017441	GO:0004672, GO:0004707, GO:0005524, GO:0006468, GO:0030554, GO:0032550, GO:0032559
TraesCS1B02G445400	Auxin efflux carrier component [Source:UniProtKB/TrEMBL;Acc:A0A1D5SG00]	1B	665407088	665410456												IPR004776, IPR014024	GO:0009734, GO:0016021, GO:0055085
TraesCS1B02G445500		1B	665437939	665439312												IPR001650, IPR011545, IPR014001, IPR014014, IPR027417	GO:0003676, GO:0005524, GO:0030554, GO:0032550, GO:0032559
TraesCS1B02G445600		1B	665452505	665455009												IPR004938	GO:0008107, GO:0016020, GO:0016021, GO:0042546
TraesCS1D02G057400		1D	37879979	37883462												IPR036047,	GO:0005515,
TraesCS1D02G057500		1D	37887828	37888256												IPR006121, IPR042885	GO:0030001, GO:0046872
TraesCS1D02G057600		1D	37897572	37898140	TaAffx.48981.1.S1_at	401.848	8.6505	5783.73	12.4978	2867.41	11.4855	3692.47	11.8504	3625.49	11.824	IPR038974
TraesCS1D02G057700		1D	37962361	37963338												IPR002885, IPR011990	GO:0005515
TraesCS1D02G057800		1D	37963745	37964836												IPR002885, IPR011990	GO:0005515
TraesCS1D02G057900		1D	38250369	38251516												IPR036047	GO:0005515
TraesCS1D02G058000		1D	38257977	38259345												IPR002885, IPR011990	GO:0005515
TraesCS1D02G058100		1D	38293376	38295532												IPR036047	GO:0005515
TraesCS1D02G058200		1D	38364008	38368257												IPR002885, IPR011990	GO:0005515
TraesCS1D02G058300	Glutamyl-tRNA reductase [Source:UniProtKB/TrEMBL;Acc:A0A1D5T5B1]	1D	38549079	38552961												IPR000343, IPR006151, IPR015895, IPR015896, IPR018214, IPR036291, IPR036343, IPR036453	GO:0006782, GO:0008883, GO:0033014, GO:0050661, GO:0055114
TraesCS1D02G058400		1D	38557872	38559581												IPR002885, IPR011990	GO:0005515
TraesCS1D02G058500		1D	38581585	38583291												IPR002885, IPR011990	GO:0005515
TraesCS1D02G058516		1D	38587885	38588340												IPR002885, IPR011990	GO:0005515
TraesCS1D02G058517		1D	38588371	38588844												IPR002885, IPR011990	GO:0005515
TraesCS1D02G058600		1D	38655263	38656433												IPR036047	GO:0005515
TraesCS1D02G058700		1D	38657231	38659200												IPR005516
TraesCS1D02G058800		1D	38726541	38729640												IPR000152, IPR000719, IPR000742, IPR001245, IPR001881, IPR008271, IPR011009, IPR017441, IPR018097, IPR025287	GO:0004672, GO:0005509, GO:0005524, GO:0006468, GO:0016021, GO:0030247, GO:0030554, GO:0032550, GO:0032559, GO:0097367
TraesCS1D02G058900		1D	38780587	38789555	TaAffx.27751.1.S1_at	105.371	6.71933	566.752	9.14657	582.483	9.18607	670.185	9.38842	735.566	9.52271	IPR000719, IPR008271, IPR011009, IPR017441	GO:0004672, GO:0005524, GO:0006468, GO:0030554, GO:0032550, GO:0032559
TraesCS1D02G059000		1D	38906964	38911490	TaAffx.119605.1.S1_at; TaAffx.68523.1.A1_at	46.6741	5.54455	196.917	7.62144	279.517	8.12679	289.541	8.17763	248.892	7.95938	IPR002182, IPR027417, IPR032675, IPR038005, IPR041118	GO:0030554, GO:0032550, GO:0032559, GO:0043531
TraesCS1D02G059100		1D	38917526	38918915												IPR001790, IPR043141	GO:0005622, GO:0042254
TraesCS1D02G059200		1D	39287710	39292333	Ta.13336.1.S1_at	10.3556	3.37234	2652.01	11.3729	4167.32	12.0249	4838.57	12.2404	6482.97	12.6624	IPR001471, IPR016177, IPR036955	GO:0003677, GO:0003700, GO:0005634, GO:0006351, GO:0006355
TraesCS1D02G059300		1D	39648748	39653427
TraesCS1D02G059400		1D	39673789	39674964												IPR011676
TraesCS2A02G185100		2A	146076711	146077163
TraesCS2A02G185200	Di-SUMO-like protein [Source:UniProtKB/TrEMBL;Acc:B8YBH7]	2A	146077791	146078405												IPR000626, IPR022617, IPR029071	GO:0005515, GO:0005634, GO:0016925, GO:0031386, GO:0044389
TraesCS2A02G185300	Switch 2 [Source:Projected from Arabidopsis thaliana (AT1G03750) UniProtKB/Swiss-Prot;Acc:F4I2H2]	2A	146079540	146086303												IPR000330, IPR001650, IPR014001, IPR027417, IPR038718	GO:0005524, GO:0030554, GO:0032550, GO:0032559, GO:0097367
TraesCS2A02G185400		2A	146724731	146725462
TraesCS2A02G185500	Tubulin alpha chain [Source:UniProtKB/TrEMBL;Acc:A4K4Z3]	2A	146785884	146789212	Ta.5566.2.S1_a_at; Ta.5566.3.S1_a_at	934.179	9.86755	672.051	9.39243	465.747	8.8634	561.567	9.13331	374.288	8.54801	IPR000217, IPR002452, IPR003008, IPR008280, IPR013838, IPR017975, IPR018316, IPR023123, IPR036525, IPR037103	GO:0000166, GO:0000226, GO:0000278, GO:0003924, GO:0005200, GO:0005525, GO:0005737, GO:0005856, GO:0005874, GO:0007010, GO:0007017, GO:0032550
TraesCS2A02G185600		2A	146824168	146825463												IPR001471, IPR016177, IPR036955	GO:0003677, GO:0003700, GO:0005634, GO:0006351, GO:0006355
TraesCS2A02G185700		2A	146954431	146963793	Ta.4732.2.S1_a_at; TaAffx.114790.1.S1_at	236.765	7.88731	1066.28	10.0584	1364.03	10.4137	1351.52	10.4004	959.278	9.90581	IPR000357, IPR016024, IPR034085, IPR040122, IPR041389, IPR041653	GO:0005515, GO:0006606
TraesCS2A02G185900	S-acyltransferase [Source:UniProtKB/TrEMBL;Acc:A0A1D5TPG3]	2A	147473812	147478492	TaAffx.14000.1.A1_at	38.6369	5.27191	382.042	8.57759	354.723	8.47055	283.692	8.14818	267.555	8.06369	IPR001594	GO:0016021, GO:0016409, GO:0019706
TraesCS2A02G186000		2A	147478725	147479549													GO:0016021
TraesCS2A02G186100		2A	147541341	147542948												IPR000719, IPR001220, IPR008271, IPR011009, IPR013320, IPR017441	GO:0004672, GO:0005524, GO:0006468, GO:0030246, GO:0030554, GO:0032550, GO:0032559
TraesCS2A02G186200		2A	147548379	147550734	TaAffx.53552.1.S1_at	11.7706	3.55712	102.686	6.6821	37.6134	5.23317	47.636	5.57398	26.4187	4.72349	IPR000719, IPR001220, IPR008271, IPR011009, IPR013320, IPR017441, IPR019825	GO:0004672, GO:0005524, GO:0006468, GO:0016021, GO:0030246, GO:0030554, GO:0032550, GO:0032559
TraesCS2A02G237800		2A	315037373	315041713	Ta.28597.1.S1_at	267.619	8.06404	1816.8	10.8272	1962.12	10.9382	1725.63	10.7529	1701.32	10.7324	IPR000210, IPR002083, IPR008974, IPR011333, IPR034090	GO:0005515
TraesCS2A02G259600		2A	408078418	408084490	TaAffx.25357.1.S1_at	81.8006	6.35404	302.184	8.23928	363.122	8.50431	501.351	8.96968	384.582	8.58715	IPR003107, IPR011990, IPR013949	GO:0000462, GO:0005515, GO:0006396, GO:0030515
TraesCS2A02G259700	Dirigent protein [Source:UniProtKB/TrEMBL;Acc:W5ATM4]	2A	408086860	408087590												IPR004265	GO:0048046
TraesCS2A02G259800	Dirigent protein [Source:UniProtKB/TrEMBL;Acc:A0A1D5THU9]	2A	408087964	408088458												IPR004265	GO:0048046
TraesCS2A02G259900	Dirigent protein [Source:UniProtKB/TrEMBL;Acc:W5AWQ9]	2A	408772893	408773920	Ta.7749.1.S1_at; Ta.7749.1.S1_s_at	696.646	9.44428	187.558	7.55119	255.936	7.99964	235.845	7.88169	128.263	7.00296	IPR004265	GO:0048046
TraesCS2A02G260000		2A	409436083	409439634	TaAffx.18131.1.S1_at	36.2619	5.18038	66.4229	6.05361	87.1535	6.44549	104.057	6.70124	48.5733	5.60209	IPR000719, IPR001611, IPR003591, IPR008271, IPR011009, IPR013210, IPR017441, IPR032675	GO:0004672, GO:0004674, GO:0005515, GO:0005524, GO:0006468, GO:0016021, GO:0030554, GO:0032550, GO:0032559, GO:0097367
TraesCS2A02G260100		2A	409639587	409642184	Ta.9825.1.S1_at; TaAffx.37219.1.S1_at	47.8319	5.5799	438.496	8.77642	432.558	8.75675	515.527	9.0099	437.682	8.77374
TraesCS2A02G260200		2A	409642762	409643864												IPR011042, IPR018119	GO:0009058, GO:0016844
TraesCS2A02G322700	Mitochondrial inner membrane protease ATP23 [Source:UniProtKB/TrEMBL;Acc:A0A341Q7P8]	2A	552471448	552487928	Ta.3518.1.S1_at	166.31	7.37773	877.198	9.77676	1113.45	10.1208	973.698	9.92733	1073.69	10.0684	IPR019165	GO:0004222
TraesCS2A02G322800	Mitochondrial inner membrane protease ATP23 [Source:UniProtKB/TrEMBL;Acc:A0A1D5TEJ5]	2A	552489683	552494270	TaAffx.1286.1.S1_at	29.2506	4.8704	222.911	7.80032	176.708	7.46522	207.058	7.69389	249.158	7.96092	IPR019165	GO:0004222, GO:0046872
TraesCS2A02G322900		2A	552495979	552496731
TraesCS2A02G323000		2A	552837951	552840178												IPR000197, IPR000210, IPR011333, IPR035898	GO:0003712, GO:0004402, GO:0005515, GO:0005634, GO:0006355, GO:0008270, GO:0042025
TraesCS2A02G323100		2A	553263816	553276486												IPR005635
TraesCS2A02G323200		2A	553278305	553280315												IPR000197, IPR000210, IPR011333, IPR035898	GO:0003712, GO:0004402, GO:0005515, GO:0005634, GO:0006355, GO:0008270, GO:0042025
TraesCS2A02G323300		2A	553480770	553482390	Ta.12770.2.A1_a_at	298.978	8.2239	3223.07	11.6542	3631.39	11.8263	3321.36	11.6976	4004.82	11.9675	IPR002569, IPR036509	GO:0008113, GO:0055114
TraesCS2A02G323400		2A	553483084	553484250												IPR017088, IPR032805	GO:0008374
TraesCS2A02G323500		2A	553482941	553491815	Ta.27922.1.S1_at; Ta.27922.1.S1_x_at	151.432	7.24253	560.363	9.13022	607.612	9.24701	462.609	8.85365	487.651	8.9297	IPR006671, IPR013763, IPR036915, IPR043198	GO:0006357, GO:0016538, GO:0042025
TraesCS2A02G323600		2A	553758944	553759821
TraesCS2A02G323700		2A	554012069	554019812	Ta.3400.1.S1_at	522.821	9.03017	3185.85	11.6375	4092.96	11.9989	3038.06	11.5689	3172.75	11.6315	IPR018625	GO:0005739, GO:0016020, GO:0016021, GO:0033617
TraesCS2A02G323800		2A	554077379	554080422
TraesCS2A02G323900		2A	554100153	554104427												IPR003439, IPR003593, IPR011527, IPR017871, IPR027417, IPR036640, IPR039421	GO:0005524, GO:0016021, GO:0016887, GO:0030554, GO:0032550, GO:0032559, GO:0042626, GO:0055085, GO:0097367
TraesCS2A02G324000		2A	554414948	554416279	Ta.10245.1.A1_at	27.5237	4.78261	42.2494	5.40086	67.2278	6.07099	131.204	7.03567	83.4361	6.3826	IPR001680, IPR015943, IPR017986, IPR036322	GO:0005515, GO:0005886
TraesCS2A02G324100	Protein MHF2 homolog [Source:Projected from Arabidopsis thaliana (AT1G78790) UniProtKB/Swiss-Prot;Acc:Q8L7N3]	2A	554428328	554429493												IPR018552	GO:0006281, GO:0007129, GO:0051382
TraesCS2A02G324200	Protein-L-isoaspartate O-methyltransferase [Source:UniProtKB/TrEMBL;Acc:W5AQ88]	2A	554450885	554453311	TaAffx.89907.1.S1_x_at	14.6369	3.87154	183.874	7.52258	255.007	7.9944	144.965	7.17956	119.54	6.90135	IPR000682, IPR029063	GO:0004719, GO:0006464
TraesCS2A02G325200		2A	555333121	555337098												IPR008833
TraesCS2A02G325300		2A	555398897	555399466	TaAffx.86813.1.S1_at	11.2287	3.48913	76.5025	6.25743	61.5454	5.94358	90.4073	6.49837	46.7638	5.54732
TraesCS2A02G325400		2A	555425894	555430013	Ta.239.1.S1_at; TaAffx.81140.1.S1_s_at	224.567	7.81101	2204.42	11.1062	2066.57	11.013	2146.5	11.0678	2281.29	11.1556	IPR010433	GO:0003743
TraesCS2A02G325500		2A	555817124	555820794												IPR023238
TraesCS2A02G325600		2A	555821144	555824354	Ta.29366.1.A1_at; Ta.9737.2.S1_a_at; Ta.9737.2.S1_x_at	118.751	6.8918	1546.83	10.5951	1128.37	10.14	1064.94	10.0566	1082.17	10.0797	IPR004434, IPR024084	GO:0004449, GO:0006099, GO:0016616, GO:0055114
TraesCS2A02G325700	Similar to OSIGBa0116M22.9 protein [Source: Projected from Oryza sativa (Os04g0479000)]	2A	555825211	555830969												IPR001270, IPR003593, IPR003959, IPR003960, IPR027417	GO:0005524, GO:0030554, GO:0032550, GO:0032559
TraesCS2A02G325800		2A	555886225	555889119												IPR023210, IPR036812
TraesCS2A02G325900		2A	556105771	556110368												IPR003441, IPR036093	GO:0003677, GO:0005634, GO:0006355
TraesCS2A02G326000		2A	556950279	556950921												IPR019557
TraesCS2A02G326100		2A	556986275	556988032	TaAffx.131077.1.S1_x_at	57.3862	5.84263	15.7643	3.97859	12.0281	3.58833	109.464	6.77431	217.788	7.76678	IPR023210, IPR036812
TraesCS2A02G326200		2A	557046034	557050519	Ta.22485.1.S1_at	192.107	7.58577	2296.95	11.1655	1739.7	10.7646	2498.4	11.2868	2861.27	11.4824	IPR006813	GO:0003830, GO:0006487, GO:0016020, GO:0016021
TraesCS2A02G326300		2A	557057177	557061046												IPR003441, IPR036093	GO:0003677, GO:0005634, GO:0006355
TraesCS2A02G528500		2A	747596675	747597331
TraesCS2A02G528600		2A	747607372	747610171												IPR013320, IPR027417, IPR043136
TraesCS2A02G528700	Double-strand break repair protein [Source:UniProtKB/TrEMBL;Acc:A0A341QCB3]	2A	747610416	747616331	TaAffx.93105.1.A1_at	22.6806	4.50339	111.036	6.79488	150.502	7.23363	108.97	6.76778	87.1404	6.44527	IPR003701, IPR004843, IPR007281, IPR029052, IPR038487, IPR041796	GO:0004519, GO:0005634, GO:0006302, GO:0008408, GO:0016787, GO:0030145, GO:0030870
TraesCS2A02G528800		2A	747616460	747619226	Ta.14465.1.S1_a_at	258.707	8.01518	2227.76	11.1214	2250.3	11.1359	2092.48	11.031	2219.93	11.1163	IPR001163, IPR010920, IPR017132	GO:0000398, GO:0000956, GO:0003723, GO:0005634, GO:0005681, GO:0005688, GO:0005689, GO:0006397, GO:0008380, GO:0071004, GO:0071013, GO:0097526, GO:1990726, GO:1990904
TraesCS2A02G528900		2A	747622852	747627064	Ta.5608.1.S1_s_at; TaAffx.113177.1.S1_s_at; TaAffx.44224.1.A1_at	304.631	8.25092	1139.87	10.1547	1278.05	10.3197	1185.88	10.2117	1246.54	10.2837	IPR000182, IPR016181	GO:0003729, GO:0005829, GO:0008080, GO:0009414, GO:0009793, GO:0016740, GO:0017198, GO:0018002, GO:0031415, GO:1990189, GO:1990190
TraesCS2A02G529000		2A	747676886	747680599												IPR002885, IPR011990	GO:0005515
TraesCS2A02G529100		2A	747697095	747697634												IPR016140, IPR036312
TraesCS2A02G529200		2A	747720769	747721170												IPR016140, IPR036312
TraesCS2A02G529332		2A	747727094	747727495												IPR016140, IPR036312
TraesCS2A02G529358		2A	747730232	747730633												IPR016140, IPR036312
TraesCS2A02G529384		2A	747733420	747733821												IPR016140, IPR036312
TraesCS2A02G529400		2A	747736556	747736957												IPR016140, IPR036312
TraesCS2A02G529457		2A	747739744	747740145												IPR016140, IPR036312
TraesCS2A02G529500		2A	747742933	747743334												IPR016140, IPR036312
TraesCS2A02G529600		2A	747746596	747746985												IPR016140, IPR036312
TraesCS2A02G529651		2A	747777016	747777417												IPR016140, IPR036312
TraesCS2A02G529656		2A	747780203	747780604												IPR016140, IPR036312
TraesCS2A02G529700		2A	747819511	747819912												IPR016140, IPR036312
TraesCS2A02G529701		2A	747813185	747813586												IPR016140, IPR036312
TraesCS2A02G529800		2A	747874783	747875184												IPR016140, IPR036312
TraesCS2A02G529900		2A	748078167	748081023												IPR001128, IPR002401, IPR017972, IPR036396	GO:0004497, GO:0005506, GO:0016021, GO:0016705, GO:0020037, GO:0055114
TraesCS2A02G530000		2A	748088437	748089655												IPR001128, IPR036396	GO:0005506, GO:0016705, GO:0020037, GO:0055114
TraesCS2A02G530100		2A	748125114	748125692												IPR001128, IPR002401, IPR036396	GO:0005506, GO:0016705, GO:0020037, GO:0055114
TraesCS2A02G530200		2A	748190464	748191018												IPR001128, IPR002401, IPR017972, IPR036396	GO:0005506, GO:0016705, GO:0020037, GO:0055114
TraesCS2A02G530300		2A	748204284	748209758												IPR002885, IPR011990	GO:0005515
TraesCS2A02G530400		2A	748221092	748221857												IPR002885, IPR011990	GO:0005515
TraesCS2A02G530500		2A	748227904	748229064												IPR024752
TraesCS2A02G530600		2A	748284749	748287662												IPR002885, IPR011990	GO:0005515
TraesCS2A02G530685		2A	748401302	748401874												IPR002885, IPR011990	GO:0005515
TraesCS2A02G530700		2A	748437526	748439046												IPR002885, IPR011990	GO:0005515
TraesCS2A02G530800		2A	748441134	748450407	Ta.5007.1.S1_s_at	291.373	8.18672	1379.74	10.4302	2275.88	11.1522	1363.15	10.4127	1637.89	10.6776	IPR004154, IPR004516, IPR006195, IPR015807, IPR036621, IPR041715	GO:0004821, GO:0005524, GO:0005737, GO:0006427, GO:0030554, GO:0032550, GO:0032559
TraesCS2A02G530900		2A	748444614	748447297	Ta.28315.1.S1_at	81.4163	6.34724	84.8008	6.40601	35.3305	5.14284	23.4269	4.5501	15.0278	3.90956	IPR001173, IPR029044	GO:0016021
TraesCS2A02G531000		2A	748452853	748458280												IPR002885, IPR011990	GO:0005515
TraesCS2A02G531100		2A	748501285	748502994												IPR002885, IPR011990	GO:0005515
TraesCS2A02G531200		2A	748524468	748524740												IPR022251
TraesCS2A02G531300		2A	748528076	748528422												IPR022251
TraesCS2A02G531400		2A	748534868	748535389	Ta.5507.1.S1_at	295.322	8.20614	41.5526	5.37687	21.3028	4.41297	112.701	6.81636	53.6814	5.74635	IPR022251
TraesCS2A02G531500		2A	748542328	748542600												IPR022251
TraesCS2A02G531600		2A	748546309	748547962												IPR022251
TraesCS2A02G531700		2A	748548092	748548850												IPR029466
TraesCS2A02G531800		2A	748558310	748558576												IPR022251
TraesCS2A02G531900		2A	748560004	748560276												IPR022251
TraesCS2A02G532000		2A	748685194	748685677	Ta.21839.1.S1_x_at	343.058	8.42231	26.2141	4.71227	42.235	5.40037	5.2886	2.40289	44.9965	5.49174	IPR022251
TraesCS2A02G532100		2A	748688522	748688779												IPR022251
TraesCS2A02G532200		2A	748698132	748698389	Ta.3059.1.S1_at	411.798	8.68579	228.517	7.83616	67.1704	6.06975	38.9806	5.28468	26.3778	4.72125	IPR022251
TraesCS2A02G532300		2A	748700143	748701107												IPR022251
TraesCS2A02G532400		2A	748775884	748776467												IPR022251
TraesCS2A02G532500		2A	748824880	748825317	Ta.19210.1.A1_a_at; Ta.19210.2.A1_x_at	22.5003	4.49187	63.6463	5.992	28.7831	4.84715	22.4443	4.48828	13.5639	3.7617	IPR022251
TraesCS2A02G532600		2A	748905883	748910525	TaAffx.94232.1.S1_at	20.8844	4.38435	201.696	7.65604	276.765	8.11252	146.571	7.19546	264.75	8.04849	IPR000719, IPR000858, IPR001480, IPR003609, IPR008271, IPR011009, IPR017441, IPR024171, IPR036426	GO:0004672, GO:0004674, GO:0005524, GO:0006468, GO:0030554, GO:0032550, GO:0032559, GO:0048544
TraesCS2A02G532700		2A	748960722	748961404	Ta.21052.1.S1_x_at	156.156	7.28684	318.444	8.31489	197.843	7.62821	227.969	7.83269	312.451	8.28749	IPR022251
TraesCS2A02G532800	Diacylglycerol kinase [Source:UniProtKB/TrEMBL;Acc:A0A341QAF2]	2A	748963953	748969366	Ta.27227.1.S1_at	243.951	7.93045	1934.62	10.9178	2264.69	11.1451	3390.54	11.7273	2879.23	11.4915	IPR000756, IPR001206, IPR016064, IPR016961, IPR017438, IPR037607	GO:0003951, GO:0004143, GO:0007165, GO:0007205, GO:0016301, GO:0030554, GO:0032550, GO:0032559, GO:0097367
TraesCS2A02G532900		2A	749058524	749059816												IPR005202
TraesCS2A02G533000		2A	749089353	749091641												IPR000719, IPR001245, IPR008271, IPR011009	GO:001707, GO:0001882, GO:0001883, GO:0004672, GO:0005524, GO:0006468, GO:0030554, GO:0032550, GO:0032553, GO:0032555, GO:0032559, GO:0097367
TraesCS2A02G533100	Exocyst subunit Exo70 family protein [Source:UniProtKB/TrEMBL;Acc:A0A341QDC9]	2A	749091283	749094017												IPR004140, IPR016159	GO:0000145, GO:0006887
TraesCS2A02G533200	Flavin-containing monooxygenase [Source:UniProtKB/TrEMBL;Acc:W5AVZ9]	2A	749103041	749104639												IPR020946, IPR036188	GO:0004499, GO:0016021, GO:0050660, GO:0050661, GO:0055114
TraesCS2A02G533300		2A	749103629	749104084
TraesCS2A02G533400	Serine/threonine-protein kinase [Source:UniProtKB/TrEMBL;Acc:A0A1D5TGU2]	2A	749385143	749389561												IPR000719, IPR000858, IPR001480, IPR003609, IPR008271, IPR011009, IPR017441, IPR024171, IPR036426	GO:0004672, GO:0004674, GO:0005524, GO:0006468, GO:0016021, GO:0030554, GO:0032550, GO:0032559, GO:0048544
TraesCS2A02G533500		2A	749446474	749448141												IPR001128, IPR036396	GO:0005506, GO:0016021, GO:0016705, GO:0020037, GO:0055114
TraesCS2A02G533600		2A	749456434	749457627												IPR036047	GO:0005515
TraesCS2A02G533700		2A	749523738	749525258												IPR001128, IPR036396	GO:0005506, GO:0016021, GO:0016705, GO:0020037, GO:0055114
TraesCS2A02G560600		2A	762756758	762763008												IPR002182, IPR027417, IPR032675, IPR041118	GO:0030554, GO:0032550, GO:0032559, GO:0043531
TraesCS2A02G560700		2A	762770075	762774906												IPR002182, IPR027417, IPR032675, IPR041118	GO:0006952, GO:0030554, GO:0032550, GO:0032559, GO:0043531
TraesCS2A02G560800		2A	762780910	762783276												IPR017946	GO:0006629, GO:0008081
TraesCS2A02G560900		2A	762799764	762805474												IPR002182, IPR027417, IPR032675, IPR041118	GO:0030554, GO:0032550, GO:0032559, GO:0043531, GO:0097367
TraesCS2A02G561000		2A	762974464	762974849
TraesCS2A02G561100		2A	762984122	762985959												IPR002182, IPR027417	GO:0006952, GO:0030554, GO:0032550, GO:0032559, GO:0043531
TraesCS2A02G561200		2A	763024413	763026599												IPR000679, IPR013088	GO:0003700, GO:0006355, GO:0008270, GO:0043565
TraesCS2A02G561300		2A	763044792	763047797	Ta.4156.1.A1_s_at	87.8738	6.45736	593.114	9.21217	604.448	9.23947	708.232	9.46808	795.476	9.63567	IPR000679, IPR013088	GO:0003700, GO:0006355, GO:0008270, GO:0043565
TraesCS2A02G561400		2A	763050709	763053402												IPR000679, IPR013088	GO:0006355, GO:0008270, GO:0043565
TraesCS2A02G561500		2A	763056171	763058616												IPR005174
TraesCS2A02G561600		2A	763190040	763198365												IPR000330, IPR001650, IPR014001, IPR027417, IPR038718	GO:0005524, GO:0030554, GO:0032550, GO:0032559
TraesCS2A02G561700		2A	763247739	763249810												IPR003441, IPR036093	GO:0003677, GO:0005634, GO:0006355
TraesCS2A02G561800		2A	763312859	763314713												IPR003441, IPR036093	GO:0003677, GO:0005634, GO:0006355
TraesCS2A02G561900		2A	763320858	763321918												IPR001229, IPR004265, IPR036404
TraesCS2A02G562000	Glycosyltransferase [Source:UniProtKB/TrEMBL;Acc:W5APS1]	2A	763332253	763334206												, IPR002213, IPR035595	GO:0016758,
TraesCS2A02G562100		2A	763364478	763369677												IPR004648, IPR004813	GO:0016021, GO:0055085
TraesCS2A02G562200		2A	763382048	763389761												IPR001128, IPR002401, IPR017972, IPR036396	GO:0004497, GO:0005506, GO:0016705, GO:0020037, GO:0055114
TraesCS2A02G562300		2A	763449690	763450976												IPR036866
TraesCS2A02G562400	Amidase 1 [Source:Projected from Arabidopsis thaliana (AT1G08980) UniProtKB/Swiss-Prot;Acc:Q9FR37]	2A	763452916	763455060	TaAffx.107243.1.S1_s_at; TaAffx.107243.1.S1_x_at; TaAffx.5408.1.S1_at	211.678	7.72573	336.193	8.39314	656.097	9.35776	139.551	7.12465	88.1753	6.4623	IPR020556, IPR023631, IPR036928	GO:0004040, GO:0005654, GO:0005829, GO:0009684, GO:0043864
TraesCS2A02G562500		2A	763684752	763695847	TaAffx.123475.1.S1_at; TaAffx.123475.2.S1_at; TaAffx.123475.2.S1_s_at	56.3769	5.81703	94.0485	6.55533	112.032	6.80777	92.407	6.52993	87.7002	6.45451	IPR000357, IPR001494, IPR011989, IPR016024, IPR040122	GO:0005515, GO:0005634, GO:0006606, GO:0006886, GO:0008536, GO:0032550, GO:0097367
TraesCS2A02G562600		2A	763796326	763799421												IPR004158	GO:0016021
TraesCS2A02G562700		2A	763802757	763804648												IPR004158	GO:0016021
TraesCS2A02G562800		2A	763867757	763871097												IPR000719, IPR001245, IPR002902, IPR008271, IPR011009, IPR038408	GO:0004672, GO:0005524, GO:0006468, GO:0016020, GO:0016021, GO:0030554, GO:0032550, GO:0032559
TraesCS2A02G562900		2A	763967454	763968182												IPR005174
TraesCS2A02G563000		2A	763980326	763981573												IPR005174
TraesCS2A02G563100		2A	764008842	764009832	Ta.13258.1.S1_x_at	1248.97	10.2865	2306.19	11.1713	4300.2	12.0702	2599.89	11.3442	1470.31	10.5219	IPR000266, IPR012340, IPR019984	GO:0003735, GO:0005840, GO:0006412, GO:0009534, GO:0009570, GO:0009941, GO:0032544
TraesCS2A02G563200		2A	764052639	764064306												IPR032675
TraesCS2A02G563300		2A	764078414	764078953
TraesCS2A02G563400		2A	764089317	764095873	Ta.7993.1.A1_at	82.6906	6.36965	58.8113	5.87802	24.957	4.64138	586.645	9.19635	661.803	9.37026	IPR000719, IPR008271, IPR011009, IPR017441, IPR021094	GO:0004672, GO:0005524, GO:0006468, GO:0006952, GO:0016020, GO:0016021, GO:0030554, GO:0032550, GO:0032559, GO:0097367
TraesCS2A02G563500		2A	764099966	764108452												IPR000182, IPR001965, IPR011011, IPR013083, IPR016181, IPR019787, IPR032308	GO:0008080
TraesCS2A02G563600		2A	764148634	764151194												IPR025315	GO:0016021
TraesCS2A02G563700	Dirigent protein [Source:UniProtKB/TrEMBL;Acc:A0A1D5T5I6]	2A	764217505	764219279												IPR001229, IPR004265, IPR033734, IPR036404	GO:0005576, GO:0030246, GO:0048046
TraesCS2A02G563800		2A	764220619	764221167
TraesCS2A02G563900		2A	764308981	764312225												IPR000719, IPR001611, IPR003591, IPR008271, IPR011009, IPR013210, IPR017441, IPR032675	GO:0004672, GO:0004674, GO:0005515, GO:0005524, GO:0006468, GO:0016021, GO:0030554, GO:0032550, GO:0032559, GO:0097367
TraesCS2A02G564000		2A	764321659	764326432												IPR001841, IPR003137, IPR013083	GO:0016021
TraesCS2A02G564100		2A	764494170	764494541
TraesCS2A02G564200		2A	764657703	764675166	Ta.30656.1.S1_at	10.0819	3.33369	20.8983	4.38531	2.83787	1.50481	7.25887	2.85974	2.63007	1.3951	IPR002182, IPR027417, IPR032675, IPR038005, IPR041118	GO:0003700, GO:0004674, GO:0005515, GO:0005524, GO:0005634, GO:0006355, GO:0006468, GO:0006952, GO:0007165, GO:0030554, GO:0032550, GO:0032559, GO:0043531, GO:0043565
TraesCS2A02G564300		2A	764677221	764679814	TaAffx.37806.1.A1_at	366.384	8.51721	23.8273	4.57454	44.5096	5.47605	31.8217	4.99194	31.7086	4.9868	IPR041118	GO:0005524, GO:0006915, GO:0006952, GO:0017111, GO:0030554, GO:0032550, GO:0032559, GO:0043531,
TraesCS2A02G564400		2A	764685267	764686294													GO:0016021
TraesCS2A02G564500		2A	764723304	764725397												IPR032675	GO:0030554, GO:0032550, GO:0032559, GO:0043531,
TraesCS2A02G564600		2A	764725510	764728499												IPR002182, IPR027417, IPR038005, IPR041118	GO:0030554, GO:0032550, GO:0032559, GO:0043531
TraesCS2A02G564700		2A	764770326	764777742												IPR000152, IPR000719, IPR000742, IPR001245, IPR001881, IPR008271, IPR011009, IPR017441, IPR018097	GO:0004672, GO:0005509, GO:0005524, GO:0006468, GO:0016021, GO:0030247, GO:0030554, GO:0032550, GO:0032559
TraesCS2A02G564800		2A	764783606	764792014												IPR002182, IPR008511, IPR027417, IPR032675	GO:0016021, GO:0030554, GO:0032550, GO:0032559, GO:0043531
TraesCS2A02G564900		2A	764819041	764821652	Ta.5376.1.S1_at; TaAffx.7708.1.S1_at	6.6725	2.73823	49.9814	5.64332	25.3027	4.66122	16.925	4.08108	10.7293	3.42349	IPR032675, IPR041118	GO:0030554, GO:0032550, GO:0032559,
TraesCS2A02G565000		2A	764889677	764900377												IPR007658, IPR025315	GO:0016021
TraesCS2A02G565100		2A	764909900	764910287
TraesCS2A02G565200		2A	764913455	764914153												IPR002562, IPR012337, IPR036397	GO:0003676, GO:0006139, GO:0008408
TraesCS2A02G565300		2A	764944839	764945102
TraesCS2A02G565400		2A	765016094	765019284												IPR005474, IPR005475, IPR005477, IPR009014, IPR020826, IPR029061, IPR033248	GO:0003824, GO:0008661, GO:0016114
TraesCS2A02G565500		2A	765039001	765042292												IPR005150, IPR029044	GO:0016020, GO:0016021, GO:0016760, GO:0030244, GO:0071555
TraesCS2A02G565600		2A	765052585	765056685												IPR000109, IPR036259	GO:0016020, GO:0016021, GO:0022857, GO:0055085
TraesCS2A02G565700		2A	765138703	765141326												IPR001128, IPR002401, IPR017972, IPR036396	GO:0004497, GO:0005506, GO:0016021, GO:0016705, GO:0020037, GO:0055114
TraesCS2A02G565800		2A	765168973	765176280												IPR002182, IPR027417, IPR032675, IPR038005, IPR041118	GO:0003700, GO:0004674, GO:0005515, GO:0005524, GO:0005634, GO:0006355, GO:0006468, GO:0006952, GO:0007165, GO:0030554, GO:0032550, GO:0032559, GO:0043531, GO:0043565
TraesCS2A02G565900		2A	765277646	765279329												IPR003441, IPR036093	GO:0003677, GO:0005634, GO:0006355
TraesCS2A02G566000		2A	765373514	765375053	TaAffx.92547.2.S1_s_at	74.4819	6.21882	5460.3	12.4148	4977.84	12.2813	1400.53	10.4518	2280.47	11.1551	IPR003441, IPR036093	GO:0003677, GO:0006355
TraesCS2A02G566100		2A	765392215	765394984	TaAffx.92547.2.S1_s_at	74.4819	6.21882	5460.3	12.4148	4977.84	12.2813	1400.53	10.4518	2280.47	11.1551	IPR003441, IPR036093	GO:0003677, GO:0006355
TraesCS2A02G566200		2A	765441094	765443545												IPR003441, IPR036093	GO:0003677, GO:0005634, GO:0006355
TraesCS2A02G566300		2A	765514968	765518243												IPR003441, IPR036093	GO:0003677, GO:0005634, GO:0006355
TraesCS2A02G566400		2A	765546559	765548303												IPR003441, IPR036093	GO:0003677, GO:0005634, GO:0006355
TraesCS2A02G566500		2A	765663084	765665593												IPR022764, IPR035952	GO:0004252, GO:0016021
TraesCS2A02G566600	DDB1- and CUL4-associated factor homolog 1 [Source:Projected from Arabidopsis thaliana (AT4G31160) UniProtKB/Swiss-Prot;Acc:Q9M086]	2A	765701103	765710721	Ta.16107.2.S1_at; TaAffx.12125.1.S1_at	36.5506	5.19182	65.2573	6.02807	31.8492	4.99319	43.7007	5.44958	48.9514	5.61328	IPR001680, IPR006594, IPR015943, IPR016024, IPR033270, IPR036322	GO:0005515, GO:0016567
TraesCS2A02G566700	Serine/threonine protein kinase, Hyperosmotic stress respons [Source: Projected from Oryza sativa (Os04g0691100)]	2A	765760972	765762877												IPR000719, IPR008271, IPR011009, IPR017441	GO:0004672, GO:0005524, GO:0006468, GO:0030554, GO:0032550, GO:0032559
TraesCS2A02G566800		2A	765826141	765827155
TraesCS2A02G566900		2A	765850264	765850485
TraesCS2A02G567000		2A	765996628	766000769
TraesCS2A02G567100		2A	766003104	766005457
TraesCS2A02G567200		2A	766095937	766097386												IPR001810, IPR017451, IPR032675, IPR036047	GO:0005515
TraesCS2A02G567300	Auxin response factor [Source:UniProtKB/TrEMBL;Acc:W5AWT5]	2A	766151730	766156639												IPR003340, IPR010525, IPR015300	GO:0003677, GO:0005634, GO:0006351, GO:0006355, GO:0009725, GO:0009734
TraesCS2A02G567400		2A	766158200	766159089
TraesCS2B02G057600		2B	28093392	28097727												IPR000109, IPR036259	GO:0016020, GO:0016021, GO:0022857, GO:0055085
TraesCS2B02G057700		2B	28173682	28175998												IPR000109, IPR036259	GO:0016020, GO:0016021, GO:0022857, GO:0055085
TraesCS2B02G057800		2B	28254620	28258111												IPR001128, IPR002401, IPR017972, IPR036396	GO:0004497, GO:0005506, GO:0016021, GO:0016705, GO:0020037, GO:0055114
TraesCS2B02G057900		2B	28271815	28274444												IPR001128, IPR002401, IPR017972, IPR036396	GO:0005506, GO:0016705, GO:0020037, GO:0055114
TraesCS2B02G058000		2B	28331574	28340802												IPR001128, IPR002401, IPR017972, IPR036396	GO:0004497, GO:0005506, GO:0016021, GO:0016705, GO:0020037, GO:0055114
TraesCS2B02G058100		2B	28349197	28358899												IPR001128, IPR002401, IPR036396	GO:0005506, GO:0016705, GO:0020037, GO:0055114
TraesCS2B02G058200		2B	28365047	28374592	Ta.7943.1.S1_at	288.018	8.17002	3147.55	11.62	2495.79	11.2853	3985.28	11.9605	2941.53	11.5224	IPR002937, IPR026669, IPR029063, IPR036188	GO:0016491, GO:0055114
TraesCS2B02G058300		2B	28415852	28417182	Ta.11358.2.A1_a_at	416.952	8.70374	2652.6	11.3732	2723.3	11.4111	4580.53	12.1613	3728.33	11.8643	IPR032710, IPR037401
TraesCS2B02G058400		2B	28419438	28423992												IPR001563, IPR029058	GO:0004185, GO:0006508
TraesCS2B02G058500		2B	28424410	28429503												IPR003663, IPR005828, IPR005829, IPR020846, IPR036259	GO:0016020, GO:0016021, GO:0022857, GO:0055085
TraesCS2B02G058600		2B	28451437	28452747												IPR032675
TraesCS2B02G058700		2B	28461211	28461630
TraesCS2B02G058800		2B	28471663	28482006												IPR003663, IPR005828, IPR005829, IPR020846, IPR036259	GO:0016020, GO:0016021, GO:0022857, GO:0055085
TraesCS2B02G058900		2B	28602295	28622502												IPR002182, IPR027417, IPR032675, IPR038005, IPR041118	GO:0005515, GO:0005524, GO:0005737, GO:0005886, GO:0006915, GO:0007165, GO:0009409, GO:0009626, GO:0009814, GO:0012505, GO:0016021, GO:0030554, GO:0032550, GO:0032559, GO:0043531, GO:0046713, GO:0097367
TraesCS2B02G059100		2B	28725167	28729269												IPR005828, IPR020846, IPR036259	GO:0016021, GO:0022857, GO:0055085
TraesCS2B02G059200		2B	28768753	28769140												IPR039274	GO:0009909
TraesCS2B02G059300		2B	28840797	28842176
TraesCS2B02G059400		2B	28883113	28885490												IPR000719, IPR000742, IPR001245, IPR001881, IPR008271, IPR011009, IPR017441, IPR025287	GO:0004672, GO:0005509, GO:0005524, GO:0006468, GO:0030247, GO:0030554, GO:0032550, GO:0032559
TraesCS2B02G059500		2B	28892980	28893678												IPR039274	GO:0009909
TraesCS2B02G059700		2B	28921385	28921651
TraesCS2B02G059800		2B	28998517	28999127	TaAffx.53432.1.S1_at	28.0281	4.8088	198.576	7.63355	66.9053	6.06405	692.113	9.43486	535.859	9.06571
TraesCS2B02G059900		2B	29005488	29005807												IPR001931, IPR018279, IPR038579	GO:0003735, GO:0005840, GO:0006412
TraesCS2B02G060200		2B	29036997	29039541
TraesCS2B02G060400		2B	29044623	29044862
TraesCS2B02G060500		2B	29046775	29047549
TraesCS2B02G060600		2B	29056527	29056781
TraesCS2B02G060700		2B	29108660	29109905												IPR001810, IPR036047	GO:0005515
TraesCS2B02G060800	Nicotianamine synthase [Source:UniProtKB/TrEMBL;Acc:W5BMA4]	2B	29118956	29120236	Ta.5145.3.S1_x_at	27.4225	4.77729	25.931	4.6966	99.0281	6.62977	176.412	7.46281	130.604	7.02905	IPR004298, IPR029063	GO:0030410, GO:0030418
TraesCS2B02G060900		2B	29151886	29157623	TaAffx.29128.1.S1_at	11.9056	3.57357	108.132	6.75665	90.8107	6.50479	298.401	8.22111	358.706	8.48666	IPR003439, IPR003593, IPR017871, IPR027417	GO:0005524, GO:0016887, GO:0030554, GO:0032550, GO:0032559
TraesCS2B02G061000		2B	29173179	29179649												IPR001906, IPR005630, IPR008930, IPR008949, IPR034741, IPR036965	GO:0000287, GO:0010333, GO:0016829
TraesCS2B02G061100		2B	29184766	29188047												IPR002182, IPR003593, IPR027417, IPR032675, IPR041118	GO:0005524, GO:0006915, GO:0006952, GO:0017111, GO:0030554, GO:0032550, GO:0032559, GO:0043531
TraesCS2B02G061200		2B	29218241	29219713	Ta.21048.1.S1_at	42.3206	5.40329	23.6666	4.56478	78.5186	6.29496	9.85647	3.30107	5.25833	2.3946
TraesCS2B02G061300		2B	29263110	29264631
TraesCS2B02G061400		2B	29318426	29319827
TraesCS2B02G061500		2B	29350461	29350733
TraesCS2B02G061600		2B	29532782	29536976												IPR002182, IPR027417, IPR032675, IPR041118	GO:0030554, GO:0032550, GO:0032559, GO:0043531
TraesCS2B02G061800		2B	29549311	29550726
TraesCS2B02G061900		2B	29553646	29555689	Ta.9768.1.S1_at	230.999	7.85174	13.2107	3.72363	13.8991	3.79692	11.0501	3.46598	7.00175	2.80772
TraesCS2B02G062000	Defensin [Source:UniProtKB/TrEMBL;Acc:W5BI32]	2B	29556274	29556647	Ta.27028.1.S1_at	57.7956	5.85289	42.574	5.4119	101.487	6.66516	48.4016	5.59698	177.024	7.4678	IPR003614, IPR008176, IPR036574	GO:0006952
TraesCS2B02G062100	Defensin [Source:UniProtKB/TrEMBL;Acc:W5BMD8]	2B	29706691	29707410	Ta.27552.1.S1_at	7.31062	2.86999	35.7545	5.16005	6.21704	2.63623	1.97392	0.981065	1.81663	0.861265	IPR003614, IPR008176, IPR036574	GO:0006952
TraesCS2B02G062200		2B	29721101	29721623
TraesCS2B02G062300		2B	29742846	29743443
TraesCS2B02G062400		2B	29752798	29753698
TraesCS2B02G062500		2B	29759694	29761308												IPR013216, IPR029063	GO:0005739, GO:0008168, GO:0046686
TraesCS2B02G062600		2B	29869438	29870571
TraesCS2B02G062700		2B	29990968	29991309
TraesCS2B02G062800		2B	29993173	29993412
TraesCS2B02G110200		2B	71642214	71642478
TraesCS2B02G110300		2B	71736557	71739485												IPR001623, IPR011990, IPR019734, IPR036869	GO:0005515
TraesCS2B02G110400		2B	72429815	72431991												IPR006760
TraesCS2B02G110500	Serine/threonine-protein kinase TIO [Source:Projected from Arabidopsis thaliana (AT1G50240) UniProtKB/Swiss-Prot;Acc:Q2QAV0]	2B	72570247	72580245	TaAffx.84617.1.S1_at	15.9563	3.99605	51.2394	5.67918	36.4116	5.18633	44.0477	5.461	58.5211	5.87089	IPR000225, IPR000719, IPR008271, IPR011009, IPR011989, IPR016024, IPR017441	GO:0000911, GO:0004672, GO:0005515, GO:0005524, GO:0006468, GO:0007112, GO:0009524, GO:0009558, GO:0019894, GO:0030554, GO:0032550, GO:0032559
TraesCS2B02G110600		2B	72580536	72581012												IPR025322
TraesCS2B02G110700		2B	72587849	72589236												IPR001077, IPR012967, IPR016461, IPR029063, IPR036388, IPR036390	GO:0008171, GO:0046983
TraesCS2B02G110800	Lon protease homolog, mitochondrial [Source:UniProtKB/TrEMBL;Acc:A0A1D5UA20]	2B	72608545	72619945	Ta.10141.1.S1_at; TaAffx.50965.1.S1_at; TaAffx.65605.1.S1_at	32.0525	5.00236	129.904	7.0213	123.155	6.94433	86.4646	6.43404	84.4202	6.39952	IPR003111, IPR003593, IPR003959, IPR004815, IPR008268, IPR008269, IPR014721, IPR015947, IPR020568, IPR027065, IPR027417, IPR027503	GO:0004176, GO:0004252, GO:0005524, GO:0005759, GO:0006508, GO:0006515, GO:0030163, GO:0030554, GO:0032550, GO:0032559, GO:0034599, GO:0043565, GO:0051131, GO:0070407
TraesCS2B02G110900		2B	72760663	72761079
TraesCS2B02G111000		2B	72811061	72817327												IPR001375, IPR029058	GO:0006508, GO:0008236
TraesCS2B02G111100	Nicotianamine synthase [Source:UniProtKB/TrEMBL;Acc:W5BNT1]	2B	72895029	72896639												IPR004298, IPR029063	GO:0030410, GO:0030418
TraesCS2B02G111200		2B	72973834	72976273												IPR011041	GO:0003824
TraesCS2B02G111300		2B	73271136	73273705
TraesCS2B02G111400	Aldehyde dehydrogenase 22A1 [Source:Projected from Arabidopsis thaliana (AT3G66658) UniProtKB/Swiss-Prot;Acc:Q0WSF1]	2B	73364902	73371455												IPR015590, IPR016160, IPR016161, IPR016162, IPR016163, IPR029510	GO:0005783, GO:0016491, GO:0016620, GO:0055114
TraesCS2B02G111500		2B	73389006	73390205												IPR001810, IPR032675, IPR036047	GO:0005515
TraesCS2B02G111600		2B	73548620	73559591												IPR032675
TraesCS2B02G111700		2B	73608010	73622319												IPR032675
TraesCS2B02G120400		2B	87960280	87960726												IPR000235, IPR005717, IPR023798, IPR034643, IPR036823	GO:0003735, GO:0005763, GO:0006412, GO:0015935, GO:0019843
TraesCS2B02G120500		2B	88173455	88173874												IPR025558, IPR040256
TraesCS2B02G120600	ATP-dependent DNA helicase [Source:UniProtKB/TrEMBL;Acc:A0A341QL51]	2B	88173975	88182641	TaAffx.118904.1.S1_at	11.115	3.47444	16.0213	4.00192	6.59053	2.72039	43.0521	5.42801	38.7824	5.27733	IPR001650, IPR002121, IPR004589, IPR010997, IPR011545, IPR014001, IPR018982, IPR027417, IPR029491, IPR032284, IPR036388, IPR036390	GO:0000166, GO:0003676, GO:0003824, GO:0004386, GO:0005524, GO:0006260, GO:0006281, GO:0006310, GO:0030554, GO:0032550, GO:0032559, GO:0043138, GO:0044237, GO:0097367
TraesCS2B02G120700		2B	88417560	88418838													GO:0016021
TraesCS2B02G120800		2B	88423427	88431503	TaAffx.113822.1.S1_at; TaAffx.113822.1.S1_s_at	110.42	6.78685	311.026	8.28089	240.826	7.91185	297.294	8.21575	357.153	8.4804	IPR039638	GO:0016592, GO:2000762
TraesCS2B02G120900		2B	88434451	88435026												IPR002048, IPR011992, IPR018247, IPR039647	GO:0005509
TraesCS2B02G121000		2B	88618432	88622044												IPR001128, IPR002401, IPR017972, IPR036396	GO:0004497, GO:0005506, GO:0016021, GO:0016705, GO:0020037, GO:0055114
TraesCS2B02G121100		2B	88837033	88841761	Ta.5204.1.S1_at	47.3144	5.56421	70.2022	6.13344	54.727	5.77418	67.8756	6.08482	20.2139	4.33728	IPR000719, IPR001611, IPR003591, IPR011009, IPR013210, IPR017441, IPR032675	GO:0004672, GO:0005515, GO:0005524, GO:0006468, GO:0016021, GO:0030554, GO:0032550, GO:0032559
TraesCS2B02G121200		2B	88845683	88847947												IPR002735, IPR016189, IPR016190	GO:0003743, GO:0006413
TraesCS2B02G121300		2B	88853037	88856526
TraesCS2B02G121400		2B	88926101	88929007												IPR001810, IPR036047	GO:0005515
TraesCS2B02G121500		2B	88930281	88934126	TaAffx.103581.1.S1_at	21.5725	4.43112	77.9558	6.28458	31.4308	4.97411	41.2307	5.36565	60.6229	5.92179	IPR000719, IPR000961, IPR008271, IPR011009, IPR017441	GO:0004672, GO:0004674, GO:0005524, GO:0006468, GO:0030554, GO:0032550, GO:0032559
TraesCS2B02G121600		2B	88975755	88979009												IPR021480, IPR040244	GO:1900150
TraesCS2B02G121700		2B	89303227	89316062	Ta.9875.1.S1_at	41.855	5.38733	525.551	9.03769	601.891	9.23336	541.345	9.0804	413.464	8.69162	IPR000330, IPR001650, IPR001841, IPR001965, IPR011011, IPR013083, IPR014001, IPR019786, IPR027417, IPR038718	GO:0001883, GO:0005524, GO:0030554, GO:0032550, GO:0032553, GO:0032555, GO:0032559, GO:0097367
TraesCS2B02G121800		2B	89326479	89328448	Ta.5319.1.S1_at	10.4819	3.38982	185.401	7.5345	177.485	7.47155	67.217	6.07075	157.692	7.30097	IPR003657, IPR036576	GO:0003700, GO:0005634, GO:0006355, GO:0043565
TraesCS2B02G121900	WRKY49 transcriptional factor [Source:UniProtKB/TrEMBL;Acc:A0A0M4CBE0]	2B	89431164	89433431												IPR003657, IPR036576	GO:0003677, GO:0003700, GO:0005634, GO:0006355, GO:0043565
TraesCS2B02G122000		2B	89491389	89491772												IPR003690, IPR038538	GO:0003690, GO:0006355
TraesCS2B02G122100		2B	89540381	89541356												IPR005795, IPR007112, IPR007117, IPR007118, IPR009009, IPR036749, IPR036908	GO:0005576, GO:0019953
TraesCS2B02G122200	tRNA (guanine(26)-N(2))-dimethyltransferase [Source:UniProtKB/TrEMBL;Acc:A0A341QJC0]	2B	89542911	89549763												IPR002905, IPR029063, IPR042296	GO:0000049, GO:0003723, GO:0004809, GO:0008033
TraesCS2B02G122300		2B	89551172	89553337	Ta.5100.1.S1_s_at	1750.21	10.7733	9276.41	13.1794	9268.6	13.1781	6986.99	12.7705	8097.9	12.9833		GO:0016020, GO:0016021
TraesCS2B02G122400		2B	89554121	89558883	Ta.9898.1.A1_at	7.97938	2.99628	75.1989	6.23264	44.8513	5.48708	82.3724	6.36409	43.7655	5.45172	IPR003137, IPR018097, IPR036249	GO:0005509
TraesCS2B02G122500		2B	89702026	89709697	Ta.5459.1.S1_at; Ta.5459.1.S1_x_at; Ta.5459.2.S1_x_at; Ta.5459.3.S1_x_at	302.488	8.24073	1628.46	10.6693	1361.02	10.4105	1428.09	10.4799	1067.71	10.0603	IPR003340, IPR011124, IPR015300	GO:0001882, GO:0001883, GO:0003677, GO:0005634, GO:0006351, GO:0006355, GO:0008270, GO:0030554, GO:0032550, GO:0032553, GO:0032555, GO:0032559, GO:0097367
TraesCS2B02G122600		2B	89840476	89841024
TraesCS2B02G122700		2B	90007487	90012286	Ta.4604.1.S1_at	20.8831	4.38427	111.087	6.79555	152.563	7.25326	192.95	7.59208	178.531	7.48003	IPR004827	GO:0003700, GO:0006355
TraesCS2B02G122800		2B	90348357	90356192												IPR043519
TraesCS2B02G123000		2B	90441197	90442018												IPR006458, IPR038933	GO:0045892
TraesCS2B02G123100	Actin-related protein 2/3 complex subunit 5 [Source:UniProtKB/TrEMBL;Acc:A0A341QJC9]	2B	90470389	90474214	Ta.7500.2.S1_at	41.2181	5.36521	207.121	7.69433	257.269	8.00713	466.526	8.86581	498.315	8.96091	IPR006789, IPR036743	GO:0005885, GO:0015629, GO:0030554, GO:0030833, GO:0032550, GO:0032559, GO:0034314, GO:0097367
TraesCS2B02G169300		2B	142238679	142245571	TaAffx.28064.1.S1_at	9.94812	3.31442	64.4219	6.00948	8.4461	3.07829	17.7834	4.15246	24.8104	4.63287	IPR000008, IPR031468, IPR035892	GO:0006869, GO:0008289, GO:0016021
TraesCS2B02G169400		2B	142373247	142378813												IPR032009, IPR032012, IPR039640, IPR041144	GO:0003779, GO:0007015, GO:0010119
TraesCS2B02G169500		2B	142446070	142446566												IPR002059, IPR011129, IPR012156, IPR012340, IPR019844	GO:0003676
TraesCS2B02G169600	Cold shock protein 2 [Source:UniProtKB/TrEMBL;Acc:W0K4H0]	2B	142675609	142676142	Ta.26125.1.S1_at	6.63187	2.72942	57.969	5.85721	15.857	3.98705	6.92721	2.79227	7.19517	2.84703	IPR002059, IPR011129, IPR012156, IPR012340, IPR019844	GO:0003676, GO:0003677, GO:0005737, GO:0006355
TraesCS2B02G169700		2B	142862762	142866233	TaAffx.115505.2.S1_s_at	120.183	6.90909	1204.3	10.234	1049.87	10.036	1765.98	10.7862	1473.24	10.5248	IPR003617, IPR017923, IPR035441	GO:0005634
TraesCS2B02G169800		2B	142888444	142889331
TraesCS2B02G169900	Peroxidase [Source:UniProtKB/TrEMBL;Acc:A0A1D5U6S0]	2B	142944413	142945770												IPR000823, IPR002016, IPR010255, IPR019793, IPR019794, IPR033905	GO:0004601, GO:0005576, GO:0006979, GO:0020037, GO:0042744, GO:0046872, GO:0055114
TraesCS2B02G170000		2B	142998719	143001884												IPR002902, IPR038408,
TraesCS2B02G170100		2B	143025300	143025812
TraesCS2B02G170200		2B	143135998	143140322												IPR000330, IPR001650, IPR001841, IPR013083, IPR014001, IPR014905, IPR017907, IPR027417, IPR038718	GO:0003676, GO:0005524, GO:0008270, GO:0016818, GO:0030554, GO:0032550, GO:0032559
TraesCS2B02G170300		2B	143272877	143274763												IPR002885, IPR011990, IPR032867	GO:0005515, GO:0008270
TraesCS2B02G170400		2B	143280732	143282174												IPR012871
TraesCS2B02G170500		2B	143483852	143485002												IPR012871
TraesCS2B02G170600		2B	143822272	143824880	TaAffx.83652.1.S1_at	5.4125	2.4363	44.4181	5.47308	51.9994	5.70042	22.8873	4.51648	40.9298	5.35508	IPR002885, IPR011990	GO:0005515
TraesCS2B02G170700		2B	143934785	143938276												IPR000629, IPR001650, IPR011545, IPR014001, IPR014014, IPR027417	GO:0003676, GO:0005524, GO:0030554, GO:0032550, GO:0032559
TraesCS2B02G170800		2B	144020899	144022626												IPR001087, IPR035669, IPR036514	GO:0016788
TraesCS2B02G170900		2B	144034258	144035817												IPR001087, IPR035669, IPR036514	GO:0016788
TraesCS2B02G171000		2B	144076903	144078609												IPR001087, IPR035669, IPR036514	GO:0016788
TraesCS2B02G389500		2B	553571414	553574294	Ta.6052.3.S1_at	670.366	9.3888	9115.85	13.1542	12463	13.6054	7214.2	12.8166	6662.99	12.702	IPR005746, IPR013766, IPR017937, IPR036249	GO:0004857, GO:0005618, GO:0006109, GO:0006662, GO:0008047, GO:0009535, GO:0009570, GO:0009735, GO:0009941, GO:0015035, GO:0019904, GO:0045454
TraesCS2B02G389600		2B	553610630	553614305	Ta.29497.1.S1_at	269.454	8.0739	2667.24	11.3811	2540.87	11.3111	2405.59	11.2322	1680.01	10.7143	IPR001841, IPR013083, IPR017907, IPR018957	GO:0046872
TraesCS2B02G389700	Syntaxin-81 [Source:Projected from Arabidopsis thaliana (AT1G51740) UniProtKB/Swiss-Prot;Acc:P59277]	2B	553614759	553618639	Ta.9299.1.S1_a_at; Ta.9299.1.S1_at	68.2269	6.09227	493.182	8.94598	433.542	8.76003	499.752	8.96507	419.1	8.71115	IPR010989, IPR019529	GO:0016020, GO:0016021, GO:0016192
TraesCS2B02G389800		2B	553618774	553624519	Ta.1633.1.S1_a_at	147.149	7.20114	1157.83	10.1772	1231.05	10.2657	1294.3	10.338	1200.69	10.2296	IPR002652	GO:0005622, GO:0006606, GO:0061608
TraesCS2B02G389900	Sphingolipid delta(4)-desaturase DES1-like [Source:UniProtKB/TrEMBL;Acc:W5BB92]	2B	553649967	553652725	Ta.10247.1.A1_at	25.9525	4.6978	79.7525	6.31746	107.687	6.75071	41.1508	5.36285	70.7519	6.1447	IPR005804, IPR011388, IPR013866	GO:0005789, GO:0006629, GO:0016021, GO:0030148, GO:0042284
TraesCS2B02G390000		2B	553873571	553877860												IPR005795, IPR007112, IPR007117, IPR007118, IPR009009, IPR036749, IPR036908	GO:0005576, GO:0019953
TraesCS2B02G390100		2B	553881046	553882255
TraesCS2B02G390200		2B	553975757	553978582												IPR019481, IPR042771	GO:0006383
TraesCS2B02G390300	Probable polyol transporter 4 [Source:Projected from Arabidopsis thaliana (AT2G20780) UniProtKB/Swiss-Prot;Acc:Q0WUU6]	2B	553978923	553983960												IPR003663, IPR005828, IPR005829, IPR020846, IPR036259	GO:0016020, GO:0016021, GO:0022857, GO:0055085
TraesCS2B02G390400		2B	554289062	554290618												IPR007577, IPR007652, IPR029044	GO:0016021
TraesCS2B02G390500		2B	554291959	554301454	Ta.30398.1.S1_at	12.0756	3.59403	32.5273	5.02358	5.32706	2.41334	20.2489	4.33977	27.2165	4.76641	IPR004274, IPR014720, IPR036412, IPR039189	GO:0003723, GO:0008420, GO:0070940
TraesCS2B02G390600		2B	554453628	554459255	Ta.16816.1.A1_x_at	40.7744	5.34959	79.1519	6.30655	204.756	7.67776	113.781	6.83012	53.4833	5.74102	IPR001680, IPR015943, IPR017986, IPR019775, IPR020472, IPR036322, IPR040324	GO:0005515
TraesCS2B02G395200		2B	560261181	560265014	TaAffx.113855.1.S1_at	31.1225	4.95989	291.611	8.1879	268.059	8.06641	384.644	8.58738	276.534	8.11131	IPR006094, IPR015345, IPR016164, IPR016166, IPR016167, IPR016169, IPR016170, IPR036318	GO:0003824, GO:0009690, GO:0016491, GO:0019139, GO:0050660, GO:0055114, GO:0071949
TraesCS2B02G395300		2B	560435169	560436499
TraesCS2B02G395400		2B	560458049	560463353												IPR000073, IPR022742, IPR029058
TraesCS2B02G395500		2B	560883513	560895325	Ta.6471.1.S1_at	19.8006	4.30747	126.89	6.98743	185.117	7.5323	201.355	7.6536	173.121	7.43564	IPR003890, IPR007193, IPR016021, IPR016024, IPR039762	GO:0000184, GO:0003723, GO:0005515
TraesCS2B02G395600		2B	561225047	561228706												IPR022228
TraesCS2B02G395700	PsbQ-like protein 3, chloroplastic [Source:Projected from Arabidopsis thaliana (AT2G01918) UniProtKB/Swiss-Prot;Acc:Q2V4B2]	2B	561228955	561229886												IPR008797, IPR023222	GO:0005509, GO:0009409, GO:0009523, GO:0009654, GO:0009767, GO:0015979, GO:0019898, GO:0045156
TraesCS2B02G395800		2B	561258873	561259403												IPR008480
TraesCS2B02G395900		2B	561282468	561286390	Ta.3252.1.S1_at	44.2825	5.46866	518.054	9.01696	358.782	8.48696	542.374	9.08314	568.87	9.15196	IPR008797, IPR023222	GO:0005509, GO:0009523, GO:0009654, GO:0015979, GO:0019898
TraesCS2B02G396000		2B	562217205	562219581												IPR005123, IPR026992, IPR027443	GO:0016491, GO:0046872, GO:0055114
TraesCS2B02G458800		2B	653593921	653598260												IPR017900, IPR032675
TraesCS2B02G458900		2B	653603688	653608203	TaAffx.89897.1.S1_at	68.1012	6.08961	241.045	7.91316	128.521	7.00586	164.302	7.3602	112.767	6.8172
TraesCS2B02G459000	Ubiquinol oxidase [Source:UniProtKB/TrEMBL;Acc:A0A341QWM9]	2B	653610681	653611670	Ta.28112.1.S1_at	42.5531	5.41119	879.038	9.77978	1551.52	10.5995	13178.2	13.6859	9429.62	13.203	IPR002680, IPR038659	GO:0009916, GO:0055114
TraesCS2B02G459100	Ubiquinol oxidase [Source:UniProtKB/TrEMBL;Acc:A0A341QU26]	2B	653619155	653621681	TaAffx.121853.1.S1_at; TaAffx.121853.1.S1_x_at	75.7638	6.24344	308.627	8.26972	306.626	8.26033	1025.16	10.0016	567.128	9.14753	IPR002680, IPR038659	GO:0009916, GO:0055114
TraesCS2B02G459200		2B	653659092	653662918
TraesCS2B02G459300	Ubiquinol oxidase [Source:UniProtKB/TrEMBL;Acc:A0A341QYM7]	2B	653745832	653748302	Ta.233.1.S1_at	60.2725	5.91343	599.298	9.22713	473.143	8.88613	716.301	9.48442	1106.05	10.1112	IPR002680, IPR038659	GO:0009916, GO:0055114
TraesCS2B02G459500		2B	653788395	653788980												IPR001283, IPR014044, IPR035940
TraesCS2B02G459600		2B	653796283	653796828	Ta.11377.1.S1_at	19.6	4.29278	12.0173	3.58704	55.4429	5.79293	7.11411	2.83068	6.1879	2.62945	IPR001283, IPR014044, IPR035940
TraesCS2B02G459700		2B	653808218	653809010												IPR001283, IPR014044, IPR035940
TraesCS2B02G459800		2B	653914212	653916658												IPR001005, IPR006447, IPR009057, IPR017930, IPR025756	GO:0003677, GO:0005634
TraesCS2B02G459900		2B	653977916	653979498	TaAffx.24035.1.S1_at	54.1544	5.75901	118.958	6.89431	28.5331	4.83456	21.4849	4.42525	9.60962	3.26448	IPR002213, IPR035595	GO:0016758
TraesCS2B02G460000		2B	654323757	654325431												IPR001077, IPR012967, IPR016461, IPR029063, IPR036388, IPR036390	GO:0008171, GO:0046983
TraesCS2B02G460100		2B	654355156	654356679												IPR001077, IPR012967, IPR016461, IPR029063, IPR036388, IPR036390	GO:0008171, GO:0046983
TraesCS2B02G460200		2B	654357650	654360679	Ta.11564.1.S1_at	51.9475	5.69898	109.59	6.77598	170.22	7.41126	94.8657	6.56781	208.881	7.70654	IPR007667, IPR040153	GO:0016021
TraesCS2B02G460300		2B	654373847	654375417	TaAffx.65836.1.S1_at	17.7925	4.1532	160.187	7.32361	234.107	7.87102	236.785	7.88743	209.092	7.70799
TraesCS2B02G461200		2B	654705642	654705974												IPR001938, IPR037176
TraesCS2B02G461219		2B	654731998	654732231												IPR039265	GO:0005504, GO:0009627
TraesCS2B02G461300		2B	655004527	655009240	Ta.4092.3.S1_a_at	883.609	9.78726	722.538	9.49693	744.349	9.53984	1089.66	10.0897	1047.4	10.0326	IPR008942, IPR013809, IPR033521	GO:0006623, GO:0030276
TraesCS2B02G461400		2B	655009903	655012488												IPR001680, IPR015943, IPR017986, IPR019775, IPR024977, IPR033010, IPR036322, IPR011047	GO:0005515, GO:0010997, GO:0097027, GO:1904668
TraesCS2B02G461500		2B	655014129	655017199												IPR003495, IPR011629, IPR027417, IPR036627
TraesCS2B02G461600		2B	655212621	655213557
TraesCS2B02G461700		2B	655214461	655216337												IPR001128, IPR002401, IPR017972, IPR036396	GO:0004497, GO:0005506, GO:0016705, GO:0020037, GO:0055114
TraesCS2B02G461800		2B	655304738	655306488	Ta.28739.1.S1_x_at; Ta.28739.2.S1_x_at	859.067	9.74663	4578.25	12.1606	6317.55	12.6251	5500.85	12.4254	5449	12.4118	IPR012643	GO:0005829, GO:0009735
TraesCS2B02G523500		2B	718214455	718214796												IPR029071
TraesCS2B02G523600		2B	718396232	718397231												IPR004827, IPR043452	GO:0003700, GO:0006355
TraesCS2B02G523700		2B	718580152	718581375												IPR004045, IPR004046, IPR010987, IPR036249, IPR036282, IPR040079	GO:0005515
TraesCS2B02G523800		2B	718583647	718585192	Ta.13412.1.S1_at	110.803	6.79185	693.208	9.43714	763.085	9.5757	1160.55	10.1806	994.996	9.95855	IPR002942, IPR022801, IPR036986	GO:0003723
TraesCS2B02G523900		2B	718585803	718592693												IPR002182, IPR027417, IPR032675, IPR038005, IPR041118	GO:0030554, GO:0032550, GO:0032559, GO:0043531, GO:0097367
TraesCS2B02G524000		2B	718593850	718596073												IPR005607, IPR035925
TraesCS2B02G524100		2B	718596715	718601147	Ta.2207.1.S1_at; Ta.2207.2.S1_a_at	411.506	8.68477	5473.82	12.4183	5605.37	12.4526	4351.79	12.0874	4595.71	12.1661	IPR000555, IPR024969, IPR033858, IPR037518	GO:0000502, GO:0005515, GO:0005838, GO:0006508, GO:0008237, GO:0043161, GO:0070122
TraesCS2B02G524200	Mediator of RNA polymerase II transcription subunit 7 [Source:UniProtKB/TrEMBL;Acc:W5BGU5]	2B	718601284	718603737	Ta.5565.1.S1_at	109.361	6.77295	1162.86	10.1835	1219	10.2515	955.191	9.89965	1013.68	9.98538	IPR009244, IPR037212	GO:0003712, GO:0005634, GO:0006357, GO:0016592, GO:0070847
TraesCS2B02G524300		2B	718604311	718608569												IPR000719, IPR001611, IPR003591, IPR008271, IPR011009, IPR013210, IPR017441, IPR032675	GO:0004672, GO:0004674, GO:0005515, GO:0005524, GO:0006468, GO:0016021, GO:0030554, GO:0032550, GO:0032559, GO:0097367
TraesCS2B02G524400		2B	718960478	718968663	Ta.11646.1.A1_at	91.6881	6.51866	431.89	8.75452	422.608	8.72318	516.51	9.01265	396.491	8.63114	IPR031937
TraesCS2B02G524500	MOT2 [Source:Projected from Arabidopsis thaliana (AT1G80310) UniProtKB/TrEMBL;Acc:A0A178WGR3]	2B	718968983	718970344												IPR031563	GO:0009705, GO:0015098, GO:0015689, GO:0016021, GO:0090414
TraesCS2B02G524600		2B	719124876	719125937												IPR006734
TraesCS2B02G524700		2B	719168003	719170794
TraesCS2B02G524800		2B	719292957	719294072												IPR031563	GO:0015098, GO:0015689, GO:0016021
TraesCS2B02G524900	RBR-type E3 ubiquitin transferase [Source:UniProtKB/TrEMBL;Acc:A0A341QWD3]	2B	719441413	719443612												IPR001841, IPR002867, IPR006575, IPR013083, IPR016135, IPR017907, IPR031127	GO:0004842, GO:0005515, GO:0016567
TraesCS2B02G525000	RBR-type E3 ubiquitin transferase [Source:UniProtKB/TrEMBL;Acc:A0A341R750]	2B	719451506	719454439												IPR001841, IPR002867, IPR006575, IPR013083, IPR016135, IPR017907, IPR031127	GO:0004842, GO:0005515, GO:0016567
TraesCS2B02G525100		2B	719463444	719465740												IPR002885, IPR011990, IPR032867	GO:0005515, GO:0008270
TraesCS2B02G525200		2B	719466349	719471265												IPR004127, IPR009053
TraesCS2B02G525300	Transmembrane 9 superfamily member [Source:UniProtKB/TrEMBL;Acc:W5BAD4]	2B	719472270	719474487												IPR004240	GO:0016021
TraesCS2B02G525400		2B	719496495	719516979												IPR002347, IPR020904, IPR036291	GO:0016491
TraesCS2B02G525500	Molybdopterin biosynthesis protein CNX1 [Source:Projected from Arabidopsis thaliana (AT5G20990) UniProtKB/Swiss-Prot;Acc:Q39054]	2B	719519658	719524890	Ta.21965.1.S1_s_at; TaAffx.113977.1.S1_s_at	134.295	7.06927	443.897	8.79408	407.093	8.66921	454.343	8.82764	352.723	8.46239	IPR001453, IPR005110, IPR005111, IPR008284, IPR036135, IPR036425, IPR036688, IPR038987	GO:0006777, GO:0030554, GO:0032324, GO:0032550, GO:0032559
TraesCS2B02G525600		2B	719526307	719531573												IPR001631, IPR008336, IPR011010, IPR013030, IPR013034, IPR013499, IPR013500, IPR014711, IPR014727, IPR018521, IPR025834, IPR036202	GO:0003677, GO:0003917, GO:0005694, GO:0006265
TraesCS2B02G525700		2B	719795079	719798058													GO:0016021
TraesCS2B02G525800		2B	719959678	719965563	TaAffx.107340.1.S1_s_at; TaAffx.107340.1.S1_x_at	46.1313	5.52767	131.167	7.03526	135.671	7.08397	170.84	7.4165	116.878	6.86886	IPR039313	GO:1900034
TraesCS2B02G525900	Inositol-pentakisphosphate 2-kinase [Source:UniProtKB/TrEMBL;Acc:W5BDI4]	2B	719966007	719970727	TaAffx.123037.2.S1_at; TaAffx.123037.4.S1_s_at	40.7475	5.34864	338.483	8.40294	319.146	8.31807	283.614	8.14778	256.566	8.00318	IPR009286, IPR043001	GO:0005524, GO:0030554, GO:0032550, GO:0032559, GO:0035299
TraesCS2B02G526000		2B	719980007	719980711												IPR006121, IPR036163	GO:0030001, GO:0046872
TraesCS2B02G526100		2B	719982847	719984216												IPR013094, IPR029058, IPR033140	GO:0016787
TraesCS2B02G550400		2B	746158769	746163848
TraesCS2B02G550500		2B	746172141	746176151												IPR004087, IPR004088, IPR036612	GO:0003676, GO:0003723
TraesCS2B02G550600		2B	746262561	746265959	Ta.9651.1.A1_at	27.3681	4.77442	67.7214	6.08154	67.8515	6.08431	46.2626	5.53178	71.5648	6.16118	IPR001715, IPR004953, IPR027328, IPR036133, IPR036872, IPR042180	GO:0005515, GO:0008017
TraesCS2B02G550700		2B	746316568	746325173												IPR003439, IPR003593, IPR011527, IPR017871, IPR027417, IPR036640, IPR039421	GO:0005524, GO:0008559, GO:0016021, GO:0016887, GO:0030554, GO:0032550, GO:0032559, GO:0042626, GO:0042910, GO:0055085
TraesCS2B02G550800		2B	746680516	746680928												IPR011598, IPR036638	GO:0046983
TraesCS2B02G550900		2B	747077042	747078098												IPR011598, IPR036638	GO:0046983
TraesCS2B02G551000		2B	747113893	747116241												IPR003653, IPR038765	GO:0006508, GO:0008234
TraesCS2B02G551100		2B	747176416	747180184	Ta.1275.1.S1_at; Ta.1275.3.S1_a_at; TaAffx.107803.1.S1_at	311.549	8.28331	891.352	9.79985	1058.34	10.0476	942.767	9.88076	785.426	9.61733	IPR000504, IPR012677, IPR034360, IPR035979	GO:0003676
TraesCS2B02G551200		2B	747180304	747181959												IPR002109, IPR036249	GO:0009055, GO:0015035, GO:0030554, GO:0032550, GO:0032559, GO:0045454
TraesCS2B02G551300		2B	747237141	747240309												IPR006153, IPR038770	GO:0006812, GO:0015081, GO:0015299, GO:0016021, GO:0055085
TraesCS2B02G551400		2B	747310013	747313653	Ta.3826.1.S1_at	15.52	3.95606	68.7958	6.10425	99.2825	6.63347	49.9424	5.64219	61.9041	5.95196	IPR000070, IPR006501, IPR011050, IPR012334, IPR033131, IPR035513	GO:0004857, GO:0030599, GO:0042545
TraesCS2B02G551600		2B	747786076	747786414
TraesCS2B02G551700		2B	747820903	747821580	Ta.21383.1.S1_x_at	13.2937	3.73268	76.6205	6.25966	93.7609	6.55091	18.6038	4.21752	29.9094	4.90253
TraesCS2B02G551800		2B	747854621	747855307
TraesCS2B02G551900		2B	747865523	747875277												IPR001810, IPR036047	GO:0005515
TraesCS2B02G552000		2B	747920882	747921157												IPR002156	GO:0003676, GO:0004523
TraesCS2B02G555700		2B	750333595	750334605	Ta.5278.1.S1_at; Ta.5278.1.S1_x_at	187.107	7.54772	804.882	9.65263	600.415	9.22982	3.9491	1.98152	6.31324	2.65838
TraesCS2B02G555800		2B	750452825	750454035												IPR010666	GO:0008270
TraesCS2B02G555900		2B	751185514	751186959
TraesCS2B02G556000		2B	751255931	751257073												IPR003690, IPR038538	GO:0003690, GO:0006355
TraesCS2B02G556100		2B	751257469	751266106												IPR002298, IPR002562, IPR012337, IPR036397, IPR043502, IPR001098	GO:0003676, GO:0003677, GO:0003887, GO:0006139, GO:0006260, GO:0006261, GO:0008408
TraesCS2B02G556200		2B	751270365	751270836												IPR039455	GO:0010374
TraesCS2B02G556500		2B	751313812	751314129												IPR002076	GO:0016021
TraesCS2B02G556600		2B	751317909	751324133												IPR004827, IPR025422	GO:0003700, GO:0006351, GO:0006355, GO:0043565
TraesCS2B02G556700		2B	751531003	751536058												IPR000504, IPR012677, IPR035979	GO:0003676, GO:0003723, GO:0030554, GO:0032550, GO:0032559, GO:0097367
TraesCS2B02G556800		2B	751539377	751541355	Ta.6362.1.S1_s_at	1489.62	10.5407	6703.81	12.7108	7238.92	12.8216	8205.29	13.0023	7163.29	12.8064
TraesCS2B02G556900		2B	751571182	751572588												IPR000073, IPR000639, IPR029058	GO:0003824
TraesCS2B02G557000		2B	751575480	751582366	Ta.3245.1.S1_at	212.138	7.72886	1146.35	10.1628	995.096	9.95869	1353.22	10.4022	1142.05	10.1574	IPR019133	GO:0005743, GO:0016021, GO:0097035, GO:0098800, GO:1901612
TraesCS2B02G557100	RBR-type E3 ubiquitin transferase [Source:UniProtKB/TrEMBL;Acc:A0A1D5U0C4]	2B	751602561	751605254												IPR001841, IPR002867, IPR013083, IPR017907, IPR031127	GO:0004842, GO:0016021, GO:0016567, GO:0046872
TraesCS2B02G557200		2B	751810829	751813564
TraesCS2B02G557300		2B	751841434	751844284												IPR027356, IPR043454, IPR000210, IPR011333	GO:0005515,
TraesCS2B02G557400		2B	751939970	751941439
TraesCS2B02G557500		2B	752299262	752299630
TraesCS2D02G116200		2D	64731744	64733964
TraesCS2D02G116300		2D	65264297	65267359	TaAffx.31450.1.S1_at	16.8581	4.07537	41.0431	5.35907	67.4283	6.07528	19.2732	4.26852	40.2342	5.33035
TraesCS2D02G116400		2D	65536044	65537168												IPR012871
TraesCS2D02G116500		2D	65562788	65568855	TaAffx.115507.1.S1_at	23.5063	4.55497	78.5306	6.29518	127.861	6.99843	146.241	7.1922	127.405	6.99328	IPR011990	GO:0005515
TraesCS2D02G116600		2D	65637999	65639708												IPR001087, IPR035669, IPR036514	GO:0016788
TraesCS2D02G116700		2D	65689615	65693040												IPR000719, IPR001611, IPR003591, IPR008271, IPR011009, IPR013210, IPR017441, IPR032675	GO:0004672, GO:0005515, GO:0005524, GO:0006468, GO:0030554, GO:0032550, GO:0032559
TraesCS2D02G116800		2D	65700830	65701554												IPR036312, IPR043325
TraesCS2D02G116900		2D	65716772	65718331
TraesCS2D02G117000		2D	66460699	66462127
TraesCS2D02G129800		2D	75551437	75554456												IPR001365, IPR032466	GO:0019239
TraesCS2D02G129900		2D	75556205	75558790	TaAffx.24838.2.A1_at	85.65	6.42038	514.328	9.00655	444.94	8.79747	490.042	8.93676	393.477	8.62014	IPR001365, IPR032466	GO:0019239
TraesCS2D02G130000		2D	75627175	75640864												IPR003439, IPR003593, IPR013525, IPR013581, IPR027417, IPR029481, IPR034001, IPR034003	GO:0005524, GO:0016020, GO:0016887, GO:0030554, GO:0032550, GO:0032559
TraesCS2D02G130100		2D	75645669	75647260												IPR003480, IPR023213	GO:0016747
TraesCS2D02G130200		2D	75656207	75659262	TaAffx.24838.1.S1_at	64.4	6.00899	260.27	8.02387	212.895	7.734	247.82	7.95315	252.945	7.98268	IPR001365, IPR032466	GO:0019239
TraesCS2D02G130300		2D	75674887	75676296												IPR002213	GO:0016758
TraesCS2D02G130400		2D	75689932	75694340												IPR006145, IPR020103	GO:0000455, GO:0001522, GO:0003723, GO:0009451, GO:0009982
TraesCS2D02G130500		2D	75750744	75752774												IPR000719, IPR001220, IPR008271, IPR011009, IPR013320, IPR017441	GO:0000166, GO:0002229, GO:0004672, GO:0004675, GO:0005524, GO:0005886, GO:0006468, GO:0006952, GO:0007178, GO:0016020, GO:0016021, GO:0016301, GO:0016310, GO:0016740, GO:0030246, GO:0030554, GO:0032550, GO:0032559, GO:0042742
TraesCS2D02G130600		2D	75754010	75756010												IPR000719, IPR001220, IPR008271, IPR011009, IPR013320, IPR017441	GO:0004672, GO:0005524, GO:0006468, GO:0016021, GO:0030246, GO:0030554, GO:0032550, GO:0032559
TraesCS2D02G130700		2D	75759659	75760807												IPR002213	GO:0008194, GO:0016758
TraesCS2D02G130800	Sialyltransferase-like protein 1 [Source:Projected from Arabidopsis thaliana (AT1G08660) UniProtKB/Swiss-Prot;Acc:Q8VZJ0]	2D	75999248	76008849	TaAffx.118901.1.S1_at; TaAffx.36899.1.A1_at	34.2822	5.09939	159.446	7.31692	170.589	7.41438	226.987	7.82647	167.394	7.3871	IPR001675, IPR038578	GO:0000138, GO:0000139, GO:0005768, GO:0005794, GO:0005802, GO:0006486, GO:0008373, GO:0009846, GO:0009860, GO:0016020, GO:0016021, GO:0016757, GO:0097503
TraesCS2D02G131000		2D	76545536	76552289												IPR003439, IPR003593, IPR011527, IPR017871, IPR027417, IPR036640	GO:001707, GO:0001882, GO:0001883, GO:0005524, GO:0008559, GO:0015081, GO:0016021, GO:0016887, GO:0030554, GO:0032550, GO:0032553, GO:0032555, GO:0032559, GO:0042626, GO:0042910, GO:0055085, GO:0097367
TraesCS2D02G131100		2D	76634429	76634623
TraesCS2D02G131200		2D	76638586	76644840												IPR000629, IPR001650, IPR011545, IPR014001, IPR014014, IPR027417	GO:0003676, GO:0005524, GO:0030554, GO:0032550, GO:0032559
TraesCS2D02G131300		2D	76652038	76653623	Ta.12077.1.A1_s_at; Ta.14993.1.S1_at; TaAffx.108686.1.S1_at	235.704	7.88083	3778.39	11.8836	4294.97	12.0684	5171.77	12.3364	4265.78	12.0586	IPR002109, IPR036249	GO:0005623, GO:0009055, GO:0015035, GO:0022900, GO:0045454, GO:0055114
TraesCS2D02G131400		2D	76713772	76714284
TraesCS2D02G131500		2D	76748627	76750259												IPR017451
TraesCS2D02G131600	Serine/threonine-protein kinase [Source:UniProtKB/TrEMBL;Acc:W5C610]	2D	76751351	76754018												IPR000719, IPR000858, IPR001480, IPR003609, IPR008271, IPR011009, IPR017441, IPR024171, IPR036426	GO:0004672, GO:0004674, GO:0005524, GO:0006468, GO:0016021, GO:0030554, GO:0032550, GO:0032559, GO:0048544
TraesCS2D02G131700	E3 ubiquitin-protein ligase [Source:UniProtKB/TrEMBL;Acc:W5B2N1]	2D	76761118	76763951	Ta.7187.2.S1_at; Ta.7187.2.S1_s_at	52.8181	5.72296	320.488	8.32413	301.138	8.23428	310.644	8.27912	287.214	8.16598	IPR001841, IPR008974, IPR013010, IPR013083, IPR018121	GO:0005515, GO:0005634, GO:0005737, GO:0006511, GO:0007275, GO:0008270, GO:0016567, GO:0016740, GO:0042025, GO:0046872, GO:0061630
TraesCS2D02G131800		2D	76801794	76802775												IPR005018
TraesCS2D02G131900		2D	76858777	76863843	TaAffx.4786.1.S1_at	507.491	8.98724	1268.96	10.3094	1294.53	10.3382	1005.52	9.97372	1065.14	10.0568	IPR008979, IPR013857, IPR016040, IPR036291, IPR039131	GO:0005773, GO:0009507, GO:0009570, GO:0010257, GO:0032981, GO:0051082
TraesCS2D02G132100	Condensin complex subunit 1 [Source:UniProtKB/TrEMBL;Acc:W5C9J2]	2D	76891407	76899986	Ta.25933.1.S1_at; Ta.25933.2.S1_a_at	14.6831	3.87609	60.0388	5.90782	66.156	6.0478	27.9303	4.80376	27.4567	4.77909	IPR007673, IPR011989, IPR016024, IPR024324, IPR026003, IPR026971, IPR032682	GO:0000278, GO:0000779, GO:0000799, GO:0003682, GO:0005634, GO:0005694, GO:0007049, GO:0007076, GO:0010032, GO:0030261, GO:0042393, GO:0051301, GO:0051304
TraesCS2D02G132200		2D	77129388	77132774	Ta.22728.1.S1_s_at	361.576	8.49816	7989.98	12.964	10525.1	13.3615	6308.37	12.6231	3796.88	11.8906	IPR006439, IPR011949, IPR023214, IPR036412, IPR041492	GO:0016787
TraesCS2D02G132300		2D	77170465	77171196												IPR025322
TraesCS2D02G132400		2D	77183632	77184747												IPR000210, IPR002083, IPR008974, IPR011333, IPR034090	GO:0005515
TraesCS2D02G132500		2D	77222794	77224583	TaAffx.18815.1.S1_s_at	84.5975	6.40254	54.6636	5.77251	46.8348	5.54951	13.8926	3.79625	17.8037	4.15411	IPR001461, IPR021109, IPR032799, IPR032861, IPR033121	GO:0004190, GO:0006508
TraesCS2D02G132600	Phosphatidylinositol 4-phosphate 5-kinase [Source:UniProtKB/TrEMBL;Acc:A0A1D5UZZ8]	2D	77378971	77383706	TaAffx.119507.1.S1_at	20.1687	4.33405	21.3662	4.41726	42.8864	5.42245	27.0439	4.75723	18.5234	4.21128	IPR002498, IPR003409, IPR017163, IPR023610, IPR027483, IPR027484	GO:0000166, GO:0005524, GO:0016301, GO:0016307, GO:0016308, GO:0016310, GO:0016740, GO:0030554, GO:0032550, GO:0032559, GO:0046488, GO:0046854
TraesCS2D02G132700		2D	78079977	78086766	Ta.22736.1.S1_at; Ta.22736.1.S1_s_at	116.719	6.8669	876.233	9.77517	962.797	9.91109	1056.7	10.0454	996.806	9.96117	IPR002110, IPR020683, IPR036770	GO:0005515
TraesCS2D02G132800		2D	78319770	78320033
TraesCS2D02G132900		2D	78375985	78392563	Ta.28435.1.S1_at; TaAffx.22799.1.S1_at	1384.11	10.4347	31214.8	14.9299	25381.5	14.6315	9757.85	13.2523	8090.7	12.982	IPR002489, IPR002932, IPR006982, IPR013785, IPR017932, IPR029055, IPR036485	GO:0003824, GO:0006537, GO:0006541, GO:0006807, GO:0008652, GO:0015930, GO:0016040, GO:0016491, GO:0016638, GO:0019676, GO:0046872, GO:0051536, GO:0051538, GO:0055114
TraesCS2D02G584900	Tubby-like F-box protein [Source:UniProtKB/TrEMBL;Acc:A0A1D5US03]	2D	644092500	644096696	TaAffx.116407.2.S1_at	35.6306	5.15505	160.42	7.32571	73.9226	6.20794	66.0982	6.04654	40.6469	5.34507	IPR000007, IPR001810, IPR018066, IPR025659, IPR036047	GO:0005515
TraesCS2D02G585000		2D	644137674	644139747	Ta.25424.1.S1_at	119.943	6.90621	737.435	9.52637	753.927	9.55828	1004.12	9.97172	1421.2	10.4729	IPR008511
TraesCS2D02G585100	Farnesylcysteine lyase [Source:Projected from Arabidopsis thaliana (AT5G63910) UniProtKB/Swiss-Prot;Acc:P57681]	2D	644329109	644333075												IPR010795, IPR017046, IPR036188	GO:0001735, GO:0005773, GO:0005774, GO:0009738, GO:0016491, GO:0016670, GO:0030327, GO:0030328, GO:0045338, GO:0055114
TraesCS2D02G585200		2D	644336814	644339089												IPR004938	GO:0005794, GO:0008107, GO:0016020, GO:0016021, GO:0016740, GO:0016757, GO:0032580, GO:0036065, GO:0042546, GO:0071555
TraesCS2D02G585300		2D	644373640	644375969												IPR003439, IPR003593, IPR013525, IPR017871, IPR027417	GO:0000166, GO:0005524, GO:0016020, GO:0016021, GO:0016887, GO:0030554, GO:0032550, GO:0032559, GO:0042626, GO:0055085, GO:0097367
TraesCS2D02G585400		2D	644389819	644390106												IPR003340, IPR015300	GO:0003677
TraesCS2D02G585500		2D	644493711	644497559	Ta.27503.1.A1_at	5.70125	2.51128	20.7135	4.3725	5.45238	2.44689	20.3324	4.34571	15.7844	3.98043	IPR000719, IPR001611, IPR003591, IPR008271, IPR011009, IPR013210, IPR017441, IPR032675	GO:0000166, GO:0004672, GO:0004674, GO:0005515, GO:0005524, GO:0006468, GO:0016020, GO:0016021, GO:0016301, GO:0016310, GO:0016740, GO:0030554, GO:0032550, GO:0032559
TraesCS2D02G585700		2D	644583122	644589445												IPR002182, IPR003593, IPR027417, IPR032675	GO:0005515, GO:0005524, GO:0005737, GO:0005886, GO:0006915, GO:0007165, GO:0009409, GO:0009626, GO:0009814, GO:0012505, GO:0016021, GO:0017111, GO:0030554, GO:0032550, GO:0032559, GO:0043531, GO:0046713
TraesCS2D02G585800		2D	644634551	644637079	TaAffx.80762.1.S1_at	69.135	6.11134	337.702	8.39961	263.096	8.03945	66.0816	6.04618	137.459	7.10286
TraesCS2D02G585900		2D	644701854	644702264
TraesCS2D02G586000		2D	644717995	644720757												IPR001810, IPR006566, IPR036047	GO:0005515
TraesCS2D02G586100		2D	644721201	644723022	Ta.11658.1.A1_at; Ta.11658.1.A1_x_at	210.282	7.71618	505.745	8.98227	722.282	9.49642	1116.64	10.1249	1181.92	10.2069	IPR001971, IPR036967	GO:0000028, GO:0000462, GO:0003735, GO:0005763, GO:0005840, GO:0006412, GO:0048027, GO:0070181
TraesCS2D02G586200		2D	644724701	644726153	Ta.628.1.S1_x_at; Ta.628.2.A1_at; Ta.628.3.S1_a_at; Ta.628.3.S1_x_at	512.784	9.00221	3854.13	11.9122	2478.84	11.2754	2257.29	11.1404	2578.97	11.3326	IPR013766, IPR036249	GO:0005623, GO:0006662, GO:0015035, GO:0045454
TraesCS2D02G586300	Cysteine proteinase inhibitor [Source:UniProtKB/TrEMBL;Acc:A0A1D6RPM4]	2D	644733143	644733637												IPR000010, IPR027214	GO:0004857, GO:0004866, GO:0004869, GO:0061135
TraesCS2D02G586400		2D	644818770	644819387
TraesCS2D02G586500	WAT1-related protein [Source:UniProtKB/TrEMBL;Acc:W5BS67]	2D	644831149	644834696												IPR000620, IPR030184	GO:0005886, GO:0016020, GO:0016021, GO:0022857, GO:0055085
TraesCS2D02G586600		2D	644875339	644875575												IPR013201, IPR038765
TraesCS2D02G586700	Cysteine proteinase inhibitor [Source:UniProtKB/TrEMBL;Acc:A0A341RN24]	2D	644897184	644897654												IPR000010, IPR027214	GO:0004857, GO:0004866, GO:0004869, GO:0061135
TraesCS2D02G586800	Cysteine proteinase inhibitor [Source:UniProtKB/TrEMBL;Acc:Q8W252]	2D	644923731	644924419	Ta.2786.1.S1_at	9.67125	3.2737	89.3249	6.48099	33.7223	5.07563	27.8206	4.79808	40.0116	5.32235	IPR000010, IPR018073, IPR027214	GO:0004857, GO:0004866, GO:0004869, GO:0006952, GO:0010466, GO:0010951, GO:0030414, GO:0061135
TraesCS2D02G586900	Cysteine proteinase inhibitor [Source:UniProtKB/TrEMBL;Acc:A0A341RW05]	2D	644975269	644975655												IPR000010, IPR018073, IPR027214	GO:0004857, GO:0004866, GO:0004869, GO:0061135
TraesCS2D02G587000		2D	645000402	645001915
TraesCS2D02G587100		2D	645009370	645012813	Ta.14593.1.S1_at	458.416	8.84051	1767.04	10.7871	2491.38	11.2827	2197.25	11.1015	2345.54	11.1957	IPR008162, IPR036649	GO:0000287, GO:0004427, GO:0005737, GO:0005829, GO:0006796, GO:0016787, GO:0046872
TraesCS2D02G587200		2D	645044191	645045319													GO:0005886, GO:0016020, GO:0016021
TraesCS2D02G587300		2D	645045766	645049173	Ta.1838.2.S1_at	80.0231	6.32235	491.334	8.94056	456.634	8.83489	489.82	8.93611	350.21	8.45208	IPR001623, IPR036869
TraesCS2D02G587400		2D	645235929	645237995												, IPR004252
TraesCS2D02G587500		2D	645357355	645357949
TraesCS2D02G587600		2D	645366509	645367854												IPR022059
TraesCS2D02G587700		2D	645429150	645430196												IPR002672, IPR029004	GO:0003735, GO:0005840, GO:0006412
TraesCS2D02G587800		2D	645611547	645614424	Ta.21106.1.A1_at	9.44812	3.24003	48.5675	5.60192	12.7732	3.67505	617.836	9.27108	528.259	9.0451
TraesCS2D02G587900	rRNA N-glycosidase [Source:UniProtKB/TrEMBL;Acc:A0A341RN37]	2D	645650231	645653557	Ta.7593.1.S1_at; TaAffx.118632.1.S1_at	21.2347	4.40835	130.706	7.03018	125.482	6.97134	1390.28	10.4412	1144.17	10.1601	IPR016138, IPR036041	GO:0017148, GO:0030598
TraesCS2D02G588000		2D	645660641	645661930												IPR008217	GO:0005384, GO:0030026
TraesCS2D02G588100	SKP1-interacting partner 15 [Source:Projected from Arabidopsis thaliana (AT1G76920) UniProtKB/Swiss-Prot;Acc:O49279]	2D	645682057	645683394	Ta.25480.1.S1_at	36.355	5.18408	626.66	9.29154	476.12	8.89518	1563.7	10.6107	1950.1	10.9293	IPR001810, IPR036047	GO:0005515
TraesCS2D02G588200		2D	645705545	645712161	Ta.25494.2.S1_a_at; TaAffx.131789.1.S1_at	15.5631	3.96006	103.695	6.6962	162.97	7.34846	310.204	8.27707	113.604	6.82787	IPR000719, IPR001245, IPR002912, IPR008271, IPR011009	GO:0004672, GO:0004674, GO:0005524, GO:0006468, GO:0030554, GO:0032550, GO:0032559
TraesCS2D02G588300		2D	645722591	645724994
TraesCS2D02G588400		2D	645730685	645730936
TraesCS2D02G588500		2D	645741138	645743936												IPR002885, IPR011990, IPR032867	GO:0005515, GO:0008270, GO:0030554, GO:0032550, GO:0032559, GO:0097367
TraesCS2D02G588600		2D	645757211	645759171												IPR000719, IPR008271, IPR011009	GO:0004672, GO:0005524, GO:0006468, GO:0030554, GO:0032550, GO:0032559
TraesCS2D02G588700		2D	645796343	645804465												IPR000719, IPR001245, IPR008271, IPR011009	GO:0004672, GO:0005524, GO:0006468, GO:0030554, GO:0032550, GO:0032559, GO:0097367
TraesCS2D02G588762		2D	645809816	645811558												IPR002885, IPR011990	GO:0005515
TraesCS2D02G588800		2D	645814772	645817165
TraesCS2D02G588900		2D	645824589	645826698												IPR002885, IPR011990, IPR032867	GO:0005515, GO:0008270, GO:0030554, GO:0032550, GO:0032559
TraesCS2D02G589000	3-isopropylmalate dehydrogenase [Source:UniProtKB/TrEMBL;Acc:A0A1D5UHC9]	2D	645827893	645832225	Ta.9350.1.S1_at	145.766	7.18751	359.965	8.49171	569.294	9.15303	483.405	8.91709	433.845	8.76104	IPR004429, IPR019818, IPR024084	GO:0000287, GO:0003862, GO:0005737, GO:0009098, GO:0016616, GO:0051287, GO:0055114
TraesCS2D02G589100		2D	645832301	645834710												IPR003746, IPR036591
TraesCS2D02G589200		2D	645838038	645839840												IPR001128, IPR002401, IPR017972, IPR036396	GO:0004497, GO:0005506, GO:0016705, GO:0020037, GO:0055114
TraesCS2D02G589300		2D	645893333	645894347												IPR004045, IPR004046, IPR010987, IPR036249, IPR036282, IPR040079	GO:0005515
TraesCS2D02G589400		2D	645932265	645934498												IPR004045, IPR010987, IPR036249, IPR036282, IPR040079	GO:0004364, GO:0005515, GO:0005737, GO:0006749
TraesCS2D02G589500		2D	645942507	645943408												IPR004045, IPR004046, IPR010987, IPR036249, IPR036282	GO:0005515
TraesCS2D02G589600		2D	645947724	645948719	TaAffx.128514.1.S1_at	6.78875	2.76315	89.1958	6.4789	176.055	7.45988	11.1627	3.48062	115.932	6.85714	IPR004045, IPR004046, IPR010987, IPR036249, IPR036282, IPR040079	GO:0004364, GO:0005515, GO:0005737, GO:0006749
TraesCS2D02G589700	Cysteine proteinase inhibitor [Source:UniProtKB/TrEMBL;Acc:A0A1D5URY4]	2D	645958642	645959221												IPR000010, IPR027214	GO:0004857, GO:0004866, GO:0004869, GO:0061135
TraesCS2D02G589800		2D	646028111	646034819	TaAffx.118966.1.S1_at; TaAffx.64060.1.S1_at	13.59	3.76447	21.8728	4.45106	25.3924	4.66633	15.5987	3.96336	9.84679	3.29965	IPR000306, IPR000408, IPR009091, IPR011011, IPR011993, IPR013083, IPR013591, IPR017455, IPR027988	GO:0046872
TraesCS2D02G589900		2D	646054715	646055610												IPR022059
TraesCS2D02G590200		2D	646417385	646419686	Ta.23293.1.S1_at; Ta.23293.1.S1_x_at	570.211	9.15535	7667.13	12.9045	8058.39	12.9763	8711.24	13.0887	13569.8	13.7281	IPR007248	GO:0005737, GO:0016020, GO:0016021
TraesCS2D02G590300		2D	646448264	646449566
TraesCS2D02G590400		2D	646461659	646462251												IPR007657	GO:0016757
TraesCS2D02G590500		2D	646476660	646477031
TraesCS2D02G590600		2D	646488160	646491914												IPR000719, IPR001611, IPR003591, IPR008271, IPR011009, IPR013210, IPR017441, IPR032675	GO:0000166, GO:0004672, GO:0004674, GO:0005515, GO:0005524, GO:0005886, GO:0006468, GO:0016020, GO:0016021, GO:0016301, GO:0016310, GO:0016740, GO:0030554, GO:0032550, GO:0032559, GO:0046777
TraesCS2D02G590700		2D	646492728	646497714												IPR002182, IPR027417, IPR032675, IPR038005, IPR041118	GO:0003700, GO:0004674, GO:0005515, GO:0005524, GO:0005634, GO:0006355, GO:0006468, GO:0006952, GO:0007165, GO:0030554, GO:0032550, GO:0032559, GO:0043531, GO:0043565
TraesCS2D02G590800		2D	646498620	646508255												IPR002182, IPR008480, IPR027417, IPR032675, IPR038005, IPR041118	GO:0005524, GO:0006952, GO:0030554, GO:0032550, GO:0032559, GO:0043531, GO:0097367
TraesCS2D02G590900		2D	646568096	646574924												IPR002182, IPR027417, IPR038005, IPR041118	GO:0006952, GO:0030554, GO:0032550, GO:0032559, GO:0043531
TraesCS2D02G591000		2D	646592448	646595303												IPR000719, IPR001245, IPR001480, IPR003609, IPR011009, IPR017441, IPR036426	GO:0004672, GO:0005524, GO:0006468, GO:0016020, GO:0016021, GO:0030554, GO:0032550, GO:0032559, GO:0097367
TraesCS2D02G591100		2D	646608562	646609677												IPR011044, IPR012871
TraesCS2D02G591200		2D	646630936	646633773												IPR002182, IPR027417, IPR038005, IPR041118	GO:0003700, GO:0004674, GO:0005515, GO:0005524, GO:0005634, GO:0006355, GO:0006468, GO:0006952, GO:0007165, GO:0030554, GO:0032550, GO:0032559, GO:0043531, GO:0043565
TraesCS2D02G591300		2D	646651194	646653725												IPR002182, IPR027417, IPR032675, IPR038005, IPR041118	GO:0030554, GO:0032550, GO:0032559, GO:0043531
TraesCS2D02G591400		2D	646787579	646788364												IPR002182, IPR027417, IPR038005, IPR041118	GO:0043531
TraesCS2D02G591500		2D	646850455	646852539												IPR038005, IPR041118
TraesCS2D02G591600		2D	646893704	646894489												IPR002182, IPR027417, IPR038005, IPR041118	GO:0030554, GO:0032550, GO:0032559, GO:0043531
TraesCS2D02G591700		2D	646948949	646949734												IPR002182, IPR027417, IPR038005, IPR041118	GO:0043531
TraesCS2D02G591800		2D	647001062	647001655												IPR038005, IPR041118	GO:0030554, GO:0032550, GO:0032559,
TraesCS2D02G591900		2D	647089896	647090183												IPR003340, IPR015300	GO:0003677
TraesCS2D02G592000		2D	647232980	647233837												IPR012871
TraesCS2D02G592100	Potassium efflux antiporter, Chloroplast development, Drought toleranc [Source: Projected from Oryza sativa (Os04g0682800)]	2D	647277697	647287367												IPR003148, IPR004771, IPR006153, IPR036291, IPR038770	GO:0006812, GO:0006813, GO:0008324, GO:0009507, GO:0009941, GO:0015297, GO:0015299, GO:0015386, GO:0016020, GO:0016021, GO:0030554, GO:0032550, GO:0032559, GO:0055085, GO:0071805, GO:0097367, GO:0098655, GO:0098656, GO:1902600
TraesCS2D02G592200		2D	647430023	647432801												IPR001810, IPR032675, IPR036047	GO:0005515
TraesCS2D02G592300		2D	647439115	647441131												IPR001810, IPR032675, IPR036047	GO:0005515
TraesCS2D02G592400		2D	647509689	647511022
TraesCS2D02G592500		2D	647511623	647515555												IPR015797, IPR016706	GO:0003723, GO:0003729, GO:0005634, GO:0005849, GO:0006378, GO:0006397, GO:0016787, GO:0017091
TraesCS2D02G592600		2D	647664035	647666026
TraesCS2D02G592700		2D	647702081	647704504												IPR007658, IPR025315
TraesCS2D02G592800		2D	647802987	647806913												IPR038005, IPR041118	GO:0001883, GO:0030554, GO:0032550, GO:0032559, GO:0043531, GO:0097367
TraesCS2D02G592900		2D	647813965	647814927												IPR005795, IPR007112, IPR007117, IPR007118, IPR009009, IPR036749, IPR036908	GO:0005576, GO:0019953
TraesCS2D02G593100		2D	647836310	647839589	TaAffx.120318.1.S1_at	54.2638	5.76192	26.8575	4.74726	59.1432	5.88614	44.9116	5.48902	51.0715	5.67445	IPR002466	GO:0003723, GO:0004000, GO:0006396
TraesCS2D02G593200		2D	647860543	647862360												IPR038005, IPR041118	GO:0003700, GO:0005524, GO:0006355, GO:0007165, GO:0009817, GO:0009861, GO:0016021, GO:0030554, GO:0032550, GO:0032559, GO:0043531, GO:2000071,
TraesCS2D02G593300		2D	647863132	647865257												IPR010666	GO:0008270
TraesCS2D02G593400	Phosphomannomutase [Source:UniProtKB/TrEMBL;Acc:C8CK09]	2D	647967729	647970766	Ta.29895.1.A1_at; Ta.29895.1.A1_s_at; Ta.3539.1.S1_x_at	199.551	7.64062	647.035	9.3377	654.317	9.35384	943.636	9.88209	1487.34	10.5385	IPR005002, IPR006379, IPR023214, IPR036412, IPR043169	GO:0004615, GO:0005737, GO:0005829, GO:0006013, GO:0006487, GO:0009298, GO:0016853, GO:0045047
TraesCS2D02G593500		2D	647974152	647975352												IPR022059
TraesCS2D02G593600		2D	648101723	648106049												IPR001810, IPR032675, IPR036047	GO:0005515
TraesCS2D02G593700		2D	648111899	648116789												IPR000504, IPR002343, IPR003954, IPR012677, IPR035979	GO:0003676, GO:0003723, GO:1990904
TraesCS2D02G593800		2D	648119816	648122505												IPR001810, IPR036047	GO:0005515
TraesCS2D02G593900		2D	648123018	648128253												IPR000504, IPR002343, IPR003954, IPR012677, IPR035979	GO:0003676, GO:0003723, GO:1990904
TraesCS2D02G594000		2D	648149569	648150040
TraesCS2D02G594100		2D	648166031	648170497												IPR036529, IPR036546	GO:0003712, GO:0005634, GO:0006355
TraesCS2D02G594200		2D	648204115	648208646	TaAffx.130104.1.S1_at	9.65938	3.27193	83.7132	6.38738	53.6597	5.74577	129.737	7.01944	102.975	6.68614	IPR000246, IPR029055, IPR037464	GO:0004298, GO:0005737, GO:0006508, GO:0016787, GO:0051604
TraesCS2D02G594300		2D	648209584	648215107												IPR005011	GO:0000398
TraesCS2D02G594500		2D	648281255	648288874	Ta.3765.1.S1_a_at; Ta.3765.1.S1_x_at	40.1713	5.32809	230.885	7.85103	245.713	7.94083	127.645	6.99599	108.635	6.76334	IPR003439, IPR003593, IPR007209, IPR013283, IPR017871, IPR017896, IPR017900, IPR027417, IPR034348	GO:0000054, GO:0000166, GO:0005506, GO:0005524, GO:0005852, GO:0006413, GO:0006415, GO:0016887, GO:0030554, GO:0032550, GO:0032559, GO:0043024
TraesCS2D02G594600		2D	648339435	648339698
TraesCS2D02G594700	RING-type E3 ubiquitin transferase [Source:UniProtKB/TrEMBL;Acc:A0A1D5UK30]	2D	648342155	648343712												IPR003613, IPR013083, IPR016024	GO:0004842, GO:0016567
TraesCS2D02G594800		2D	648350787	648355393												IPR000504, IPR003954, IPR012677, IPR035979	GO:0003676, GO:0003723, GO:0003730, GO:0005634, GO:0005737, GO:0005829, GO:0008143, GO:0008266, GO:1990904
TraesCS2D02G594900		2D	648357586	648358948
TraesCS2D02G595000		2D	648466884	648471442												IPR000719, IPR001245, IPR003591, IPR008271, IPR011009, IPR013210, IPR017441, IPR032675	GO:0004672, GO:0004674, GO:0005524, GO:0006468, GO:0016021, GO:0030554, GO:0032550, GO:0032559
TraesCS2D02G595100	Nudix hydrolase 26, chloroplastic [Source:Projected from Arabidopsis thaliana (AT3G10620) UniProtKB/Swiss-Prot;Acc:Q9CAF2]	2D	648473712	648476886	Ta.5028.1.S1_a_at	337.826	8.40013	1625.64	10.6668	2053.13	11.0036	2338.01	11.1911	2779.92	11.4408	IPR000086, IPR015797, IPR020084, IPR020476, IPR022927	GO:0001883, GO:0006753, GO:0008893, GO:0009507, GO:0016787, GO:0030554, GO:0032550, GO:0032559, GO:0034432, GO:0097367
TraesCS2D02G595200		2D	648570416	648573833												IPR032675
TraesCS2D02G595300		2D	648576485	648578874												IPR002182, IPR027417, IPR038005, IPR041118	GO:0005524, GO:0006952, GO:0030554, GO:0032550, GO:0032559, GO:0043531
TraesCS2D02G595400		2D	648595034	648595774												IPR032675
TraesCS2D02G595500		2D	648634921	648639221												IPR013057
TraesCS2D02G595600		2D	648663670	648664341												IPR006137, IPR006138	GO:0008137, GO:0048038, GO:0051536, GO:0051539, GO:0055114
TraesCS3A02G148800		3A	131646148	131651754	TaAffx.32117.1.S1_at; TaAffx.66658.1.A1_at	239.816	7.90578	2344.77	11.1952	2050.77	11.0019	1301.44	10.3459	940.704	9.8776		GO:0016021,
TraesCS3A02G148900	tRNA (guanine(37)-N1)-methyltransferase [Source:UniProtKB/TrEMBL;Acc:A0A1D5VJ07]	3A	131749774	131768380												IPR025792, IPR029063, IPR030382	GO:0005634, GO:0005759, GO:0009019, GO:0030488, GO:0052906
TraesCS3A02G149000		3A	132581440	132582495												IPR001471, IPR016177, IPR036955	GO:0003677, GO:0003700, GO:0005634, GO:0006351, GO:0006355
TraesCS3A02G149100		3A	134234662	134237289	Ta.9030.2.S1_a_at	33.3456	5.05943	22.3714	4.48358	9.29307	3.21616	11.3828	3.50879	11.3354	3.50277	IPR038939	GO:0010020
TraesCS3A02G149200		3A	134237719	134239435	TaAffx.111198.1.S1_at	51.2444	5.67932	266.674	8.05893	288.49	8.17238	283.079	8.14506	254.153	7.98955	IPR009069
TraesCS3A02G149300		3A	134240740	134245504												IPR018108, IPR023395	GO:0016021,
TraesCS3A02G149400		3A	134245584	134247747	TaAffx.58818.1.S1_at	55.5994	5.797	113.28	6.82375	181.443	7.50337	207.945	7.70006	178.714	7.48151	IPR027973
TraesCS3A02G149500	Flavin-containing monooxygenase [Source:UniProtKB/TrEMBL;Acc:A0A1D5VGJ3]	3A	134600543	134603205	Ta.22369.1.S1_at	5.29125	2.40361	1.78273	0.834088	5.2274	2.38609	10.7922	3.43192	6.19283	2.6306	IPR020946, IPR036188	GO:0004499, GO:0050660, GO:0050661, GO:0055114
TraesCS3A02G149600		3A	134613198	134613741												IPR037595
TraesCS3A02G149700		3A	135378286	135387809												IPR004252, IPR039266	GO:0032196
TraesCS3A02G150300	SMR domain-containing protein At5g58720 [Source:Projected from Arabidopsis thaliana (AT5G58720) UniProtKB/Swiss-Prot;Acc:O65573]	3A	137574043	137582522	Ta.3448.1.S1_at	236.575	7.88615	2958.71	11.5308	2878.46	11.4911	2907.04	11.5053	2460.57	11.2648	IPR002625, IPR013899, IPR036063	GO:0030554, GO:0032550, GO:0032559,
TraesCS3A02G150400		3A	137591590	137599684												IPR005225, IPR006073, IPR015946, IPR016484, IPR027417, IPR031166, IPR032859	GO:0005525, GO:0005739, GO:0032550
TraesCS3A02G150500		3A	137600605	137609219	Ta.4745.1.S1_at	6.90125	2.78686	94.2943	6.5591	50.1892	5.6493	832.829	9.70188	731.063	9.51385	IPR007378	GO:0015031
TraesCS3A02G150600	3-methyl-2-oxobutanoate hydroxymethyltransferase [Source:UniProtKB/TrEMBL;Acc:A0A1D5VHS1]	3A	137609236	137611992												IPR003700, IPR015813, IPR040442	GO:0003824, GO:0003864, GO:0015940
TraesCS3A02G150700		3A	137785828	137786898												IPR012871
TraesCS3A02G150800		3A	137787132	137787587	Ta.25026.1.S1_at	24.8287	4.63394	551.509	9.10724	303.856	8.24724	509.133	8.9919	435.102	8.76521	IPR004864, IPR013990	GO:0009269
TraesCS3A02G150900		3A	137912166	137917125	TaAffx.25796.1.S1_s_at	200.621	7.64833	429.321	8.74591	342.518	8.42004	411.007	8.68302	401.305	8.64856	IPR007233, IPR011012	GO:0005829, GO:0016192, GO:0030008
TraesCS3A02G151000		3A	138284334	138286066	Ta.6938.1.S1_at	10.2644	3.35957	63.4147	5.98675	68.438	6.09673	71.7182	6.16427	36.8656	5.2042	IPR039619	GO:0005886, GO:0032550
TraesCS3A02G151100	Peptidyl-prolyl cis-trans isomerase [Source:UniProtKB/TrEMBL;Acc:A0A1D5VHR0]	3A	140003720	140014025	Ta.9153.1.S1_at; Ta.9153.3.S1_a_at	343.54	8.42433	611.452	9.2561	1032.25	10.0116	662.547	9.37188	632.883	9.30579	IPR002130, IPR020892, IPR029000	GO:0000413, GO:0003755, GO:0006457, GO:0006979, GO:0009535, GO:0009570, GO:0009642, GO:0009651, GO:0009735, GO:0009737, GO:0009941, GO:0010555, GO:0019344, GO:0022626, GO:0031977, GO:0042742, GO:0048046
TraesCS3A02G151200	Reticulon-like protein [Source:UniProtKB/TrEMBL;Acc:A0A1D5VHR2]	3A	140040910	140043728	Ta.13936.1.S1_at; Ta.13936.1.S1_s_at	580.328	9.18073	1962.9	10.9388	2161.9	11.0781	2009.81	10.9728	1787	10.8033	IPR003388	GO:0005789, GO:0016021
TraesCS3A02G151300		3A	140050261	140056408	Ta.26280.1.S1_at	11.4556	3.51798	9.16811	3.19662	29.8065	4.89755	13.0076	3.70128	19.3505	4.2743	IPR003593, IPR003959, IPR003960, IPR027417, IPR041569	GO:0005524, GO:0030554, GO:0032550, GO:0032559, GO:0097367
TraesCS3A02G151400		3A	140805091	140807759												IPR004695, IPR038665	GO:0016021, GO:0055085
TraesCS3A02G151500		3A	140956483	140957744												IPR036047	GO:0005515
TraesCS3A02G151600		3A	141008416	141010990												IPR007741, IPR036249, IPR039927	GO:0003735, GO:0032543
TraesCS3A02G151700	U11/U12 small nuclear ribonucleoprotein 59 kDa protein [Source:Projected from Arabidopsis thaliana (AT2G46200) UniProtKB/Swiss-Prot;Acc:Q8VYD3]	3A	141041357	141046031	Ta.3364.1.A1_at	47.2606	5.56257	201.301	7.65321	191.904	7.58424	292.341	8.19151	268.482	8.06868	, IPR031974
TraesCS3A02G151800		3A	141910098	141911498	Ta.7039.1.S1_at	14.4213	3.85012	39.3273	5.29746	4.25215	2.08819	26.2071	4.71189	28.6644	4.84119	IPR006458, IPR038933	GO:0045892
TraesCS3A02G151900	Chlorophyll b reductase, Leaf senescenc [Source: Projected from Oryza sativa (Os01g0227100)]	3A	142573563	142578648	Ta.1733.1.S1_at	691.914	9.43445	5266.45	12.3626	7141.7	12.8021	5571.56	12.4439	6090.9	12.5724	IPR002347, IPR036291	GO:0009536, GO:0010304, GO:0015996, GO:0034256
TraesCS3A02G152000		3A	142579172	142581096	Ta.6643.1.S1_at; Ta.6643.2.S1_a_at	426.004	8.73472	884.243	9.7883	1382.95	10.4335	2340.88	11.1928	1544.38	10.5928	IPR004087, IPR036612, IPR039912	GO:0003676, GO:0003723
TraesCS3A02G152100		3A	142878674	142881350												IPR001128, IPR002401, IPR017972, IPR036396	GO:0004497, GO:0005506, GO:0016705, GO:0020037, GO:0055114
TraesCS3A02G152200		3A	142890247	142895029	Ta.11116.1.A1_at; TaAffx.46608.1.S1_at	88.9912	6.47559	624.258	9.286	606.917	9.24536	562.04	9.13453	660.935	9.36836	IPR000719, IPR001245, IPR008271, IPR011009, IPR017441	GO:0004672, GO:0005524, GO:0006468, GO:0016021, GO:0030554, GO:0032550, GO:0032559
TraesCS3A02G152300		3A	142896448	142900496	Ta.29570.1.S1_at	140.93	7.13883	862.621	9.75258	987.866	9.94817	1318.41	10.3646	1154	10.1724	IPR001806, IPR005225, IPR027417	GO:0003924, GO:0005525, GO:0030554, GO:0032550, GO:0032559, GO:0097367
TraesCS3A02G152500		3A	142923164	142925500												IPR001128, IPR002401, IPR017972, IPR036396	GO:0004497, GO:0005506, GO:0016021, GO:0016705, GO:0020037, GO:0055114
TraesCS3A02G152600		3A	142976623	142994563
TraesCS3A02G152700		3A	143017324	143023650												IPR001128, IPR002401, IPR017972, IPR036396	GO:0004497, GO:0005506, GO:0016021, GO:0016705, GO:0020037, GO:0055114
TraesCS3A02G152800		3A	143470691	143471054												IPR002156	GO:0003676, GO:0004523
TraesCS3A02G153000		3A	143533072	143535014	TaAffx.81500.1.S1_at	31.1125	4.95942	96.5286	6.59288	266.113	8.05589	106.09	6.72914	102.865	6.68461	IPR001128, IPR002401, IPR017972, IPR036396	GO:0004497, GO:0005506, GO:0016705, GO:0020037, GO:0055114
TraesCS3A02G153100		3A	143541890	143545404	Ta.12582.1.S1_at	186.905	7.54616	1835.67	10.8421	1802.03	10.8154	1790.35	10.806	2132.96	11.0586	IPR007248	GO:0005737, GO:0016020, GO:0016021
TraesCS3A02G257000		3A	478910907	478911545	Ta.5993.1.S1_at	822.427	9.68374	3420.24	11.7399	3168.05	11.6294	4286.15	12.0655	5220.75	12.35
TraesCS3A02G257100		3A	478913874	478914341
TraesCS3A02G257200		3A	478951230	478951688
TraesCS3A02G257300		3A	479069848	479070357
TraesCS3A02G257400		3A	479099171	479100582												IPR002213	GO:0016758
TraesCS3A02G257500		3A	479129028	479136034												IPR003439, IPR003593, IPR011527, IPR017871, IPR027417, IPR036640, IPR039421	GO:0005524, GO:0008559, GO:0016021, GO:0016887, GO:0030554, GO:0032550, GO:0032559, GO:0042626, GO:0042910, GO:0055085
TraesCS3A02G257600		3A	479473689	479479765
TraesCS3A02G257700		3A	479474776	479476669												IPR003280, IPR013099	GO:0005267, GO:0016020, GO:0071805
TraesCS3A02G257800		3A	479481051	479482052												IPR001005, IPR009057, IPR017930	GO:0003677
TraesCS3A02G257900		3A	479689738	479689992
TraesCS3A02G258000		3A	479766816	479774098	Ta.2793.1.S1_at	13.8781	3.79474	177.612	7.47259	148.862	7.21783	136.115	7.08869	235.064	7.87691	IPR003439, IPR003593, IPR011527, IPR017871, IPR027417, IPR036640, IPR039421	GO:0000166, GO:0005524, GO:0008559, GO:0016020, GO:0016021, GO:0016887, GO:0030554, GO:0032550, GO:0032559, GO:0042626, GO:0042910, GO:0055085
TraesCS3A02G258100		3A	479780978	479784141	Ta.8678.1.S1_a_at	1147.09	10.1638	2041.54	10.9954	2878.61	11.4912	2980.28	11.5412	4563.5	12.1559	IPR001087, IPR035669, IPR036514	GO:0016788
TraesCS3A02G258200		3A	480046032	480052283												IPR003439, IPR003593, IPR011527, IPR017871, IPR027417, IPR036640, IPR039421	GO:0005524, GO:0008559, GO:0016021, GO:0016887, GO:0030554, GO:0032550, GO:0032559, GO:0042626, GO:0042910, GO:0055085
TraesCS3A02G258300		3A	480102330	480109964												IPR003439, IPR003593, IPR011527, IPR017871, IPR027417, IPR036640, IPR039421	GO:0000166, GO:0005524, GO:0008559, GO:0016020, GO:0016021, GO:0016887, GO:0030554, GO:0032550, GO:0032559, GO:0042626, GO:0042910, GO:0055085
TraesCS3A02G258400		3A	480147090	480154719												IPR003439, IPR003593, IPR011527, IPR017871, IPR027417, IPR036640, IPR039421	GO:0005524, GO:0008559, GO:0016021, GO:0016887, GO:0030554, GO:0032550, GO:0032559, GO:0042626, GO:0042910, GO:0055085, GO:0097367
TraesCS3A02G258500		3A	480431064	480434304												IPR027278, IPR036052
TraesCS3A02G258600		3A	480435226	480438679												IPR000092, IPR008949, IPR033749, IPR039702	GO:0008299, GO:0016740, GO:0016765
TraesCS3A02G258700		3A	480438027	480442994												IPR003406	GO:0016020
TraesCS3A02G258800		3A	481018121	481022362	Ta.7104.1.S1_at	110.53	6.78829	322.944	8.33514	384.281	8.58602	785.469	9.61741	744.399	9.53993	IPR013216, IPR025771, IPR029063, IPR041698	GO:0000234, GO:0006656, GO:0008168
TraesCS3A02G258900		3A	481068443	481075010	TaAffx.92303.1.S1_at	113.283	6.82379	45.0633	5.49388	33.1185	5.04956	7.58758	2.92364	35.5902	5.15341	IPR008942, IPR011417, IPR013809, IPR014712	GO:0005543, GO:0005545, GO:0030136, GO:0030276, GO:0048268
TraesCS3A02G259000		3A	481088592	481088714												IPR012552
TraesCS3A02G259100		3A	481093127	481093249												IPR012552
TraesCS3A02G259200		3A	481508605	481524050	Ta.7229.1.S1_at	180.487	7.49575	1232.74	10.2676	1091.75	10.0924	1229.67	10.2641	1033.95	10.0139	IPR011989, IPR022075, IPR032460
TraesCS3A02G259300		3A	481659100	481659531
TraesCS3A02G259400		3A	481872625	481877026
TraesCS3A02G259500		3A	481878928	481882649												IPR000719, IPR001245, IPR001611, IPR003591, IPR008271, IPR011009, IPR013210, IPR017441, IPR032675	GO:0000166, GO:0004672, GO:0004674, GO:0005515, GO:0005524, GO:0006468, GO:0016020, GO:0016021, GO:0016301, GO:0016310, GO:0016740, GO:0030554, GO:0032550, GO:0032559
TraesCS3A02G259600		3A	481883442	481887186												IPR000719, IPR001245, IPR001611, IPR003591, IPR008271, IPR011009, IPR013210, IPR017441, IPR032675	GO:0004672, GO:0004674, GO:0005515, GO:0005524, GO:0006468, GO:0016021, GO:0030554, GO:0032550, GO:0032559
TraesCS3A02G259700		3A	482060474	482068322	Ta.12425.1.A1_at	1132.52	10.1453	16738.5	14.0309	14782.1	13.8516	17438.6	14.09	19501.7	14.2513	IPR001926, IPR004450, IPR026260, IPR036052	GO:0004795, GO:0009088
TraesCS3A02G259800		3A	482092614	482093752												IPR001841, IPR013083
TraesCS3A02G259900		3A	482183185	482184828	TaAffx.24604.1.S1_at	11.3019	3.49849	123.323	6.9463	272.27	8.08889	1403.02	10.4543	1856.43	10.8583	IPR001471, IPR003340, IPR015300, IPR016177, IPR036955	GO:0003677, GO:0003700, GO:0006355
TraesCS3A02G260000		3A	482403120	482407555												IPR000504, IPR012677, IPR035979	GO:0003676, GO:0003723
TraesCS3A02G263300		3A	486928055	486930086												IPR027417, IPR039657	GO:0008033, GO:0030554, GO:0032550, GO:0032559
TraesCS3A02G263400		3A	487431890	487435435												IPR000073, IPR022742, IPR029058	GO:0009507
TraesCS3A02G263500		3A	487436557	487439668	TaAffx.116915.1.S1_s_at	109.522	6.77508	193.8	7.59843	173.111	7.43556	242.612	7.9225	251.174	7.97254	IPR005061, IPR042277	GO:0015031
TraesCS3A02G263600		3A	487443317	487443724
TraesCS3A02G263700		3A	487444146	487447816	Ta.575.1.S1_at	26.9819	4.75392	472.941	8.88551	586.242	9.19535	691.666	9.43393	529.51	9.04852	IPR034604	GO:0000380, GO:0000398
TraesCS3A02G263800		3A	487448225	487451984	TaAffx.66635.1.S1_at	38.1806	5.25477	76.9854	6.26651	64.9128	6.02043	76.3771	6.25507	62.4387	5.96437	IPR002376, IPR005793, IPR005794, IPR011034, IPR036477, IPR037022, IPR041711	GO:0003824, GO:0004479, GO:0009058, GO:0016742, GO:0071951
TraesCS3A02G263900		3A	487853163	487855279	Ta.23073.1.S1_at	1440.8	10.4927	3760.7	11.8768	5162.35	12.3338	5745.15	12.4881	5198.23	12.3438	IPR001680, IPR015943, IPR017986, IPR019775, IPR020472, IPR036322	GO:0005515
TraesCS3A02G264000		3A	487857253	487859848												IPR011016, IPR013083, IPR022143, IPR033275	GO:0008270, GO:0016021
TraesCS3A02G264100	Protein-lysine N-methyltransferase [Source:UniProtKB/TrEMBL;Acc:A0A1D6DB83]	3A	487859734	487865764												IPR025714, IPR026635, IPR029063	GO:0005737, GO:0008168, GO:0016279
TraesCS3A02G264200	Glycosyltransferase [Source:UniProtKB/TrEMBL;Acc:A0A1D5V5P7]	3A	488108205	488109839												IPR002213, IPR035595	GO:0016758
TraesCS3A02G264300		3A	488260517	488261318												IPR025322
TraesCS3A02G264400		3A	488282784	488283453												IPR016195	GO:0003824
TraesCS3A02G264500		3A	488303038	488303929												IPR025322
TraesCS3A02G264600		3A	488307783	488312183	Ta.10982.1.A1_x_at	66.1562	6.04781	329.379	8.3636	391.344	8.61229	338.697	8.40385	202.639	7.66277	IPR007145	GO:0000226, GO:0008017
TraesCS3A02G299900		3A	534179995	534197401	TaAffx.4553.1.S1_s_at	186.539	7.54333	681.222	9.41198	832.918	9.70203	912.579	9.83381	1363.34	10.4129	IPR005607
TraesCS3A02G300100		3A	534200246	534201046												IPR016972
TraesCS3A02G300200		3A	534323968	534324830												IPR016972
TraesCS3A02G300300		3A	534364600	534367697
TraesCS3A02G300400	Protein DETOXIFICATION [Source:UniProtKB/TrEMBL;Acc:A0A1D5VG40]	3A	534467102	534470083												IPR002528	GO:0015238, GO:0015297, GO:0016020, GO:0016021, GO:0042910, GO:0055085
TraesCS3A02G300500		3A	534478011	534478957												IPR002048, IPR011992, IPR018247	GO:0005509
TraesCS3A02G300600		3A	534531413	534534349	Ta.6896.1.A1_x_at; TaAffx.118896.1.S1_at	28.7006	4.84301	160.712	7.32834	116.713	6.86682	107.104	6.74287	162.254	7.34211
TraesCS3A02G300700		3A	534534751	534536265												IPR000215, IPR023795, IPR023796, IPR036186, IPR042178, IPR042185	GO:0005615
TraesCS3A02G300800		3A	534536300	534550711	Ta.18526.2.S1_at; Ta.18526.2.S1_s_at	178.051	7.47615	1913.56	10.902	1655.09	10.6927	2114.2	11.0459	1802.55	10.8158	IPR000504, IPR012677, IPR035979, IPR012921	GO:0003676
TraesCS3A02G300900		3A	534987566	534992062												IPR002125, IPR015517, IPR016192, IPR016193, IPR035105	GO:0003824, GO:0008270, GO:0016787
TraesCS3A02G301000		3A	534995559	534997259												IPR002885, IPR011990	GO:0005515
TraesCS3A02G301100		3A	534998411	535002929												IPR004304	GO:0016811
TraesCS3A02G301200		3A	535003506	535007433	Ta.4110.1.S1_at	8.79187	3.13617	63.4573	5.98771	80.3485	6.3282	49.4118	5.62678	73.6257	6.20214	IPR004993
TraesCS3A02G301300		3A	535167777	535169404												IPR030184	GO:0016021, GO:0022857
TraesCS3A02G301400		3A	535183908	535189593	TaAffx.22142.2.A1_at	11.38	3.50843	148.766	7.2169	94.9649	6.56932	219.502	7.77809	213.918	7.74091	IPR005227, IPR006641, IPR012337, IPR037027	GO:0006139, GO:0006364
TraesCS3A02G301500	Isopentenyl phosphate kinase [Source:Projected from Arabidopsis thaliana (AT1G26640) UniProtKB/Swiss-Prot;Acc:Q8H1F7]	3A	535190771	535194807												IPR001048, IPR024192, IPR036393	GO:0005524, GO:0005829, GO:0016114, GO:0016301, GO:0030554, GO:0032550, GO:0032559, GO:0097367, GO:0102043
TraesCS3A02G301600	Clp protease adapter protein ClpF, chloroplastic [Source:Projected from Arabidopsis thaliana (AT2G03390) UniProtKB/Swiss-Prot;Acc:Q67Y99]	3A	535195059	535199817	TaAffx.119792.1.S1_at	143.022	7.16009	380.293	8.57097	397.115	8.63341	283.389	8.14664	292.33	8.19145	IPR001943, IPR011722, IPR036623	GO:0003677, GO:0005515, GO:0009840
TraesCS3A02G301700		3A	535200300	535200512
TraesCS3A02G301800	Chorismate mutase [Source:UniProtKB/TrEMBL;Acc:A0A1D5VBW7]	3A	535216244	535219824	Ta.5448.1.S1_at; Ta.5448.2.S1_a_at	159.873	7.32078	487.72	8.92991	532.763	9.05735	504.87	8.97977	552.515	9.10987	IPR008238, IPR036263, IPR037039	GO:0004106, GO:0009073, GO:0046417
TraesCS3A02G301900		3A	535222098	535222892												IPR003245, IPR008972, IPR039391	GO:0009055, GO:0016021
TraesCS3A02G302000		3A	535223999	535227936	TaAffx.86259.1.S1_at	22.4719	4.49005	40.5828	5.3428	77.702	6.27988	75.5904	6.24013	98.2709	6.61869	IPR003734	GO:0005739, GO:0010082, GO:0016021, GO:0032875, GO:0051302
TraesCS3A02G302100		3A	535323539	535326920	Ta.240.1.S1_a_at	1001.07	9.96733	5935.38	12.5351	7402.46	12.8538	6509.17	12.6683	9411.25	13.2002	IPR004045, IPR004046, IPR010987, IPR034347, IPR036249, IPR036282	GO:0005515
TraesCS3A02G302200		3A	535543704	535551298	TaAffx.26218.1.S1_at	86.7144	6.4382	494.886	8.95095	738.84	9.52912	544.189	9.08796	814.576	9.66991	IPR000719, IPR008271, IPR011009, IPR013210, IPR017441, IPR032675	GO:0000166, GO:0004672, GO:0005524, GO:0006468, GO:0016020, GO:0016021, GO:0016301, GO:0016310, GO:0016740, GO:0030554, GO:0032550, GO:0032559
TraesCS3A02G302300		3A	535716019	535719701												IPR004045, IPR004046, IPR010987, IPR034347, IPR036249, IPR036282, IPR040079	GO:0005515, GO:0097367
TraesCS3A02G302400		3A	535727269	535728626												IPR012946
TraesCS3A02G302500		3A	535824413	535826209												IPR006873
TraesCS3A02G317600		3A	558515572	558516381
TraesCS3A02G317700		3A	558881167	558891010	Ta.26274.1.S1_at; Ta.26274.2.S1_a_at	169.048	7.40129	1007.31	9.9763	1033.67	10.0136	1323.29	10.3699	1410.23	10.4617	IPR000330, IPR001650, IPR001841, IPR013083, IPR014001, IPR017907, IPR027417, IPR038718	GO:0005524, GO:0030554, GO:0032550, GO:0032559
TraesCS3A02G317800		3A	558891382	558893421												IPR000719, IPR001220, IPR008271, IPR011009, IPR013320, IPR017441, IPR019825	GO:0004672, GO:0005524, GO:0006468, GO:0016021, GO:0030246, GO:0030554, GO:0032550, GO:0032559
TraesCS3A02G317900	Expansin [Source:UniProtKB/TrEMBL;Acc:A0A341S878]	3A	559064728	559065575												IPR002963, IPR007112, IPR007117, IPR007118, IPR009009, IPR036749, IPR036908	GO:0005576, GO:0009664
TraesCS3A02G318000	Expansin [Source:UniProtKB/TrEMBL;Acc:A0A1D5VG26]	3A	559264361	559265451	Ta.21031.1.S1_at	7.5875	2.92362	71.2966	6.15576	76.301	6.25363	32.1966	5.00884	31.985	4.99932	IPR002963, IPR007112, IPR007117, IPR007118, IPR009009, IPR036749, IPR036908	GO:0005576, GO:0005618, GO:0009664, GO:0016020, GO:0071555
TraesCS3A02G318100	Expansin [Source:UniProtKB/TrEMBL;Acc:A0A1D5VG25]	3A	559334058	559335151	Ta.21031.1.S1_at	7.5875	2.92362	71.2966	6.15576	76.301	6.25363	32.1966	5.00884	31.985	4.99932	IPR002963, IPR007112, IPR007117, IPR007118, IPR009009, IPR036749, IPR036908	GO:0005576, GO:0005618, GO:0009664, GO:0016020
TraesCS3A02G318200		3A	559526803	559527042
TraesCS3A02G318300		3A	559526764	559537263												IPR001431, IPR007863, IPR011249, IPR011765, IPR032632	GO:0003824, GO:0004222, GO:0006508, GO:0046872
TraesCS3A02G318400		3A	559537938	559544910	Ta.6732.1.A1_at; TaAffx.37087.1.S1_at	95.4075	6.57603	440.22	8.78208	477.4	8.89906	495.605	8.95305	574.769	9.16684
TraesCS3A02G318500		3A	559624953	559625795
TraesCS3A02G318600		3A	559813638	559813856												IPR039281	GO:0016021
TraesCS3A02G362700		3A	611155762	611155971
TraesCS3A02G362800		3A	611165599	611170760												IPR000408, IPR009091	GO:0016020, GO:0016021,
TraesCS3A02G362900	Transcription initiation factor TFIID subunit 12b [Source:Projected from Arabidopsis thaliana (AT1G17440) UniProtKB/Swiss-Prot;Acc:Q940A7]	3A	611199480	611204996	TaAffx.29103.1.S1_at	18.4775	4.2077	15.2378	3.92959	12.0467	3.59057	28.1997	4.81761	29.9743	4.90566	IPR003228, IPR009072, IPR037794	GO:0000124, GO:0005669, GO:0006352, GO:0046695, GO:0046982
TraesCS3A02G363000		3A	611700692	611703172	Ta.28546.1.A1_at; Ta.7474.2.S1_a_at	420.333	8.71539	1532.96	10.5821	1465.02	10.5167	1879.66	10.8763	2111.95	11.0444	IPR001451, IPR005835, IPR018357, IPR029044	GO:001707, GO:0001882, GO:0001883, GO:0009058, GO:0016740, GO:0016779, GO:0032550, GO:0032553, GO:0032555, GO:0097367
TraesCS3A02G363100	CASP-like protein [Source:UniProtKB/TrEMBL;Acc:A0A1D5VDG0]	3A	611704066	611711475	Ta.18831.1.S1_s_at; Ta.18831.1.S1_x_at	174.118	7.44392	978.132	9.93388	870.34	9.76543	807.899	9.65803	1184.13	10.2096	IPR006702	GO:0005886, GO:0016021,
TraesCS3A02G363200		3A	611706476	611707524
TraesCS3A02G363300		3A	611707729	611708614
TraesCS3A02G363400		3A	611944642	611948641	Ta.10389.1.S1_a_at; Ta.10389.3.A1_at	138.615	7.11494	3740.14	11.8689	3992.07	11.9629	5149.38	12.3302	5949.77	12.5386	IPR018170, IPR020471, IPR023210, IPR036812	GO:0016491, GO:0055114
TraesCS3A02G363500		3A	611950301	611952173												IPR018170, IPR020471, IPR023210, IPR036812	GO:0016491, GO:0055114
TraesCS3A02G363600	PRA1 family protein [Source:UniProtKB/TrEMBL;Acc:A0A341S4W8]	3A	611951512	611954658												IPR004895
TraesCS3A02G363700	Delta-1-pyrroline-5-carboxylate synthase [Source:UniProtKB/TrEMBL;Acc:A0A341S1S0]	3A	611964689	611971232	Ta.7091.1.S1_at	276.167	8.1094	2869.94	11.4868	2328.27	11.185	3784.66	11.8859	2259.41	11.1417	IPR000965, IPR001048, IPR001057, IPR005715, IPR005766, IPR015590, IPR016161, IPR016162, IPR016163, IPR019797, IPR020593, IPR036393	GO:0003824, GO:0004349, GO:0004350, GO:0005524, GO:0005737, GO:0006561, GO:0016491, GO:0016620, GO:0030554, GO:0032550, GO:0032559, GO:0055114, GO:0055129
TraesCS3A02G363800	Pentatricopeptide repeat-containing protein At3g46790, chloroplastic [Source:Projected from Arabidopsis thaliana (AT3G46790) UniProtKB/Swiss-Prot;Acc:Q9STF3]	3A	611971731	611974144												IPR002885, IPR011990, IPR032867	GO:0005515, GO:0008270, GO:0031425, GO:0031426
TraesCS3A02G363900		3A	612523359	612528093												IPR001356, IPR006563, IPR008422, IPR009057	GO:0003677, GO:0005634, GO:0006355
TraesCS3A02G364000		3A	612764123	612764550
TraesCS3A02G364100		3A	612984862	612987369												IPR001806, IPR005225, IPR027417	GO:0001883, GO:0003924, GO:0005525, GO:0030554, GO:0032550, GO:0032559, GO:0097367
TraesCS3A02G364200		3A	613167784	613169595	TaAffx.59592.1.S1_at	4.66688	2.22246	81.0405	6.34057	71.9465	6.16885	68.2553	6.09287	54.2544	5.76167
TraesCS3A02G364300		3A	613171518	613171851												IPR016140, IPR036312, IPR039265	GO:0005504, GO:0009627
TraesCS3A02G364400		3A	613172438	613176196												IPR005512, IPR038937	GO:0005089
TraesCS3A02G364500		3A	613198122	613198328	Ta.19529.1.S1_a_at	88.5719	6.46878	813.998	9.66888	900.574	9.8147	278.374	8.12088	166.07	7.37565	IPR021775	GO:0016020, GO:0016021
TraesCS3A02G364600		3A	613390295	613393480
TraesCS3A02G364700		3A	614124887	614125915
TraesCS3A02G364800		3A	614228307	614231079
TraesCS3A02G364900		3A	614237516	614242446												IPR032675
TraesCS3A02G404300		3A	649532765	649535830	Ta.24221.1.S1_s_at	110.903	6.79315	1337.66	10.3855	1160.48	10.1805	1067.03	10.0594	1223.45	10.2567	IPR003774
TraesCS3A02G404400		3A	649540667	649541242												IPR001471, IPR016177, IPR036955	GO:0003677, GO:0003700, GO:0005634, GO:0006351, GO:0006355
TraesCS3A02G404500		3A	649544370	649548528	Ta.9928.1.S1_at; Ta.9928.1.S1_s_at; TaAffx.117450.1.S1_at; TaAffx.117450.2.S1_s_at	93.4028	6.54539	1056.73	10.0454	814.507	9.66978	586.832	9.1968	505.31	8.98102	IPR000073, IPR029058
TraesCS3A02G404600		3A	649605494	649608510	TaAffx.37448.1.S1_at	5.93875	2.57016	56.5029	5.82025	19.1539	4.25957	1.65417	0.726106	0.84266	-0.246977	IPR000008, IPR013583, IPR035892
TraesCS3A02G404700		3A	649629574	649635160
TraesCS3A02G404800		3A	649713106	649714849	TaAffx.61848.1.S1_at	57.9444	5.8566	437.874	8.77437	492.676	8.94449	313.952	8.2944	488.649	8.93265	IPR016971	GO:0016021
TraesCS3A02G404900		3A	649772229	649773332												IPR000719, IPR001245, IPR011009	GO:0004672, GO:0005524, GO:0006468, GO:0030554, GO:0032550, GO:0032559
TraesCS3A02G405000		3A	649808649	649811323	Ta.3792.1.S1_at; TaAffx.105012.1.S1_s_at	7.48531	2.90406	20.1741	4.33444	33.9441	5.08509	40.9053	5.35422	39.5791	5.30667	IPR002327, IPR009056, IPR036909	GO:0005739, GO:0009055, GO:0020037, GO:0046872, GO:0070469
TraesCS3A02G405100		3A	649814718	649816145	Ta.4851.1.A1_at	27.1456	4.76265	21.0372	4.39487	84.8326	6.40655	10.291	3.36332	24.8459	4.63494	IPR003340, IPR015300, IPR039218	GO:0003677, GO:0005634, GO:0006351, GO:0006355
TraesCS3A02G405200		3A	649818934	649823072												IPR000232, IPR027725, IPR036388, IPR036390	GO:0003677, GO:0003700, GO:0005634, GO:0006355, GO:0042025, GO:0043565
TraesCS3A02G405300		3A	649850949	649854815	Ta.25590.3.S1_a_at	419.168	8.71138	4212.37	12.0404	4777.77	12.2221	2759.2	11.43	2953.32	11.5281	IPR032816	GO:0009507, GO:0016021
TraesCS3A02G405400		3A	649937883	649939424												IPR002885, IPR011990, IPR032867	GO:0005515, GO:0008270
TraesCS3A02G405500	DNA replication complex GINS protein SLD5 [Source:UniProtKB/TrEMBL;Acc:A0A1D5VD75]	3A	649939890	649942727	TaAffx.119070.1.S1_at	24.23	4.59872	75.7605	6.24337	81.3209	6.34555	15.7274	3.97521	28.0794	4.81144	IPR008591, IPR021151, IPR031633, IPR036224, IPR038749	GO:0005634, GO:0006261
TraesCS3A02G405600		3A	650006872	650008625	Ta.19167.1.S1_at	379.308	8.56723	2866.5	11.4851	2978.93	11.5406	3021.83	11.5612	2389.34	11.2224		GO:0016021
TraesCS3A02G405700		3A	650012893	650013264	TaAffx.128418.16.S1_x_at	2342.39	11.1938	137212	17.066	93047.7	16.5057	33406.7	15.0278	32144.7	14.9723
TraesCS3A02G405800		3A	650014534	650014966												IPR022546
TraesCS3A02G405900		3A	650029252	650042140												IPR001965, IPR003121, IPR003169, IPR004343, IPR013083, IPR035445, IPR036128, IPR036885	GO:0003677, GO:0005515
TraesCS3A02G406000	NAC transcription factor 6A [Source:UniProtKB/TrEMBL;Acc:F6GSE5]	3A	650056057	650058213												IPR003441, IPR036093	GO:0003677, GO:0005634, GO:0006355, GO:0009409, GO:0043565, GO:0045893, GO:0048364, GO:1900150, GO:1901002, GO:1902584
TraesCS3A02G406100		3A	650422075	650427712	Ta.26255.1.S1_at	141.498	7.14463	127	6.98868	183.142	7.51682	254.795	7.9932	239.409	7.90334	IPR004159, IPR029063	GO:0008168, GO:0016021
TraesCS3A02G406200		3A	650429119	650433106												IPR005123, IPR026992, IPR027443	GO:0016491, GO:0046872, GO:0055114
TraesCS3A02G424100		3A	667105131	667106015												IPR000223, IPR019533, IPR036286, IPR037730	GO:0006465, GO:0006508, GO:0006627, GO:0008236, GO:0016020, GO:0042720
TraesCS3A02G424200		3A	667132137	667133368
TraesCS3A02G424300		3A	667135147	667138017												IPR001906, IPR005630, IPR008930, IPR008949, IPR036965	GO:0000287, GO:0010333, GO:0016829
TraesCS3A02G424400		3A	667162201	667163052
TraesCS3A02G424500		3A	667219018	667220345												IPR001128, IPR002401, IPR036396	GO:0005506, GO:0016705, GO:0020037, GO:0055114
TraesCS3A02G424600		3A	667220385	667220843												IPR001128, IPR002401, IPR017972, IPR036396	GO:0005506, GO:0016705, GO:0020037, GO:0055114
TraesCS3A02G424700		3A	667304520	667308022												IPR001128, IPR002401, IPR017972, IPR036396	GO:0004497, GO:0005506, GO:0016705, GO:0020037, GO:0055114
TraesCS3A02G424800		3A	667353149	667354784
TraesCS3A02G424900		3A	667355647	667358815													GO:0016021,
TraesCS3A02G425000		3A	667494026	667495312												IPR000823, IPR002016, IPR010255, IPR019793	GO:0004601, GO:0006979, GO:0020037, GO:0055114
TraesCS3A02G425100		3A	667504846	667505732												IPR000095
TraesCS3A02G425200		3A	667513745	667514042
TraesCS3A02G425300		3A	667661896	667663000	Ta.30780.1.A1_at	53.8937	5.75205	243.031	7.925	194.954	7.60699	196.705	7.61989	214.849	7.74718
TraesCS3A02G425400		3A	667704486	667704722	Ta.28077.1.S1_s_at	12.1644	3.60459	89.184	6.47871	123.041	6.943	72.162	6.17317	74.1132	6.21166
TraesCS3A02G425500	Sucrose phosphate synthase, Sucrose synthesis in pollen germinatio [Source: Projected from Oryza sativa (Os01g0919400)]	3A	667793456	667799445	Ta.3972.1.S1_at; Ta.3972.2.S1_at	12.4259	3.63528	61.8186	5.94997	50.7076	5.66413	67.3534	6.07368	17.8407	4.1571	IPR000368, IPR001296, IPR006380, IPR012819, IPR023214, IPR035659	GO:0005794, GO:0005985, GO:0016157, GO:0016740, GO:0016757, GO:0046524
TraesCS3A02G425600		3A	667947729	667951658	TaAffx.55517.1.S1_at	280.207	8.13035	1115.64	10.1237	872.738	9.7694	677.652	9.4044	554.737	9.11566	IPR001841, IPR013083, IPR017907
TraesCS3A02G425700		3A	668211449	668213256	TaAffx.111967.2.S1_at	17.4325	4.12371	119.337	6.8989	92.8581	6.53696	86.462	6.43399	40.9441	5.35558
TraesCS3A02G425800		3A	668405601	668406178
TraesCS3A02G425900		3A	668550872	668554412	Ta.5750.1.S1_at	23.2737	4.54063	103.084	6.68768	50.1862	5.64922	19.3397	4.27349	37.2577	5.21947	IPR001841, IPR013083, IPR017907
TraesCS3A02G426000		3A	668581881	668585304												IPR002083, IPR008974	GO:0005515
TraesCS3A02G426100		3A	668867329	668869608												IPR001841, IPR013083, IPR017907
TraesCS3A02G426200		3A	669523725	669526262	TaAffx.30725.1.S1_s_at	170.361	7.41245	1072.82	10.0672	1203.86	10.2335	995.364	9.95908	1195.43	10.2233	IPR001841, IPR013083, IPR017907, IPR036529	GO:0003712, GO:0006355,
TraesCS3A02G426300		3A	669562865	669563976
TraesCS3A02G426400		3A	669565785	669568156	Ta.10083.1.S1_at	30.9469	4.95172	123.138	6.94413	129.891	7.02116	142.169	7.15146	117.734	6.87939	IPR001841, IPR013083, IPR017907
TraesCS3A02G426500		3A	669601322	669604488												IPR007877	GO:0016021,
TraesCS3A02G426600		3A	669616344	669621544												IPR000073, IPR029058	GO:0009507,
TraesCS3A02G426700	Auxin efflux carrier component [Source:UniProtKB/TrEMBL;Acc:A0A1D5V8S9]	3A	669619467	669624388												IPR004776, IPR014024	GO:0009734, GO:0016021, GO:0055085
TraesCS3A02G426800		3A	669729050	669733805	Ta.8504.2.S1_x_at	1117.2	10.1257	15582.8	13.9277	16747.6	14.0317	10638	13.3769	9265.95	13.1777	IPR005067, IPR009078, IPR012348	GO:0006631, GO:0016491, GO:0045300, GO:0046872, GO:0055114
TraesCS3A02G426900		3A	669985288	669986553
TraesCS3A02G427000		3A	670535600	670546735												IPR006566, IPR032675, IPR036047	GO:0005515
TraesCS3A02G427100	CBS domain-containing protein CBSX6 [Source:Projected from Arabidopsis thaliana (AT1G65320) UniProtKB/Swiss-Prot;Acc:Q8GZA4]	3A	670548364	670551652												IPR000644	GO:0005773, GO:0030554
TraesCS3A02G521900		3A	738236580	738240286												IPR000719, IPR000742, IPR001881, IPR008271, IPR011009, IPR017441, IPR018097, IPR025287	GO:0004672, GO:0005509, GO:0005524, GO:0006468, GO:0016021, GO:0030247, GO:0030554, GO:0032550, GO:0032559
TraesCS3A02G522100		3A	738304030	738307517												IPR000719, IPR000742, IPR001881, IPR008271, IPR011009, IPR017441, IPR018097, IPR025287	GO:0004672, GO:0005509, GO:0005524, GO:0006468, GO:0030247, GO:0030554, GO:0032550, GO:0032559
TraesCS3A02G522200		3A	738325031	738325922												IPR000742, IPR025287	GO:0030247
TraesCS3A02G522300		3A	738431512	738435697												IPR000719, IPR000742, IPR001881, IPR008271, IPR011009, IPR017441, IPR018097, IPR025287	GO:0004672, GO:0005509, GO:0005524, GO:0006468, GO:0030247, GO:0030554, GO:0032550, GO:0032559
TraesCS3A02G522400		3A	738452182	738459614												IPR000719, IPR008271, IPR011009, IPR017441	GO:0004672, GO:0005524, GO:0006468, GO:0030554, GO:0032550, GO:0032559
TraesCS3A02G522465		3A	738502105	738504535												IPR000719, IPR008271, IPR011009, IPR017441, IPR025287	GO:0004672, GO:0005524, GO:0006468, GO:0030247
TraesCS3A02G522600		3A	738599921	738600868												IPR000152, IPR025287	GO:0030247
TraesCS3A02G522700		3A	738639424	738642326												IPR000719, IPR000742, IPR001881, IPR008271, IPR009030, IPR011009, IPR017441, IPR018097	GO:0004672, GO:0005509, GO:0005524, GO:0006468, GO:0030554, GO:0032550, GO:0032559, GO:0097367
TraesCS3A02G522900		3A	738690614	738694017												IPR000152, IPR000719, IPR000742, IPR001881, IPR009030, IPR011009, IPR017441, IPR018097, IPR025287	GO:0004672, GO:0005509, GO:0005524, GO:0006468, GO:0030247, GO:0030554, GO:0032550, GO:0032559
TraesCS3A02G523100		3A	738705666	738706394
TraesCS3A02G523300		3A	738727798	738730251	Ta.18291.1.S1_at	19.3325	4.27296	38.173	5.25448	47.8359	5.58002	15.2254	3.9284	39.1479	5.29086	IPR007658, IPR025315
TraesCS3A02G523400		3A	738902153	738905501												IPR000719, IPR008271, IPR011009	GO:0004672, GO:0005524, GO:0006468, GO:0030554, GO:0032550, GO:0032559
TraesCS3A02G523600		3A	739117066	739122325												IPR004367, IPR006671, IPR013763, IPR036915, IPR039361	GO:0005634, GO:0042025
TraesCS3A02G523700		3A	739143779	739147909	TaAffx.59073.1.S1_at; TaAffx.59073.1.S1_x_at	510.87	8.99681	1409.09	10.4605	2828.65	11.4659	1893.18	10.8866	1529.15	10.5785	IPR002885, IPR011990	GO:0005515
TraesCS3A02G523800		3A	739149797	739152269												IPR002885, IPR011990	GO:0001883, GO:0005515, GO:0030554, GO:0032550, GO:0032559, GO:0097367
TraesCS3A02G524000		3A	739158541	739160858	Ta.27110.2.S1_x_at	1490.04	10.5411	11516	13.4914	12218.9	13.5768	11046	13.4312	11226.9	13.4547	IPR001199, IPR018506, IPR036400	GO:0016021, GO:0020037, GO:0046872
TraesCS3A02G524100		3A	739166625	739167782
TraesCS3A02G524300		3A	739274066	739276498												IPR005031, IPR023393	GO:0005634
TraesCS3A02G524400		3A	739276714	739278923	TaAffx.1097.1.A1_at	77.6881	6.27962	727.699	9.5072	564.539	9.14093	470.996	8.87957	437.777	8.77405	IPR005031, IPR023393	GO:0005634,
TraesCS3A02G524500		3A	739309245	739309931												IPR002562, IPR012337, IPR036397	GO:0003676, GO:0006139, GO:0008408
TraesCS3A02G524600		3A	739321707	739324212	Ta.7671.1.S1_at	51.0162	5.67288	365.093	8.51212	232.373	7.8603	294.223	8.20076	249.675	7.96391	IPR040353
TraesCS3A02G524700		3A	739377345	739384052												IPR005123, IPR026992, IPR027443	GO:0016491, GO:0055114
TraesCS3A02G524800		3A	739388676	739397596	TaAffx.63731.1.A1_at	67.8575	6.08444	363.434	8.50555	327.995	8.35753	401.736	8.6501	380.615	8.57219	IPR000197, IPR000433, IPR001965, IPR011011, IPR013083, IPR013178, IPR019786, IPR031162, IPR035898, IPR043145	GO:0003712, GO:0004402, GO:0005634, GO:0006355, GO:0008270, GO:0016573, GO:0042025
TraesCS3A02G524900		3A	739399439	739400971
TraesCS3A02G525000		3A	739512947	739517036	Ta.6006.1.S1_at; TaAffx.78758.1.S1_at	88.7819	6.47219	439.036	8.7782	361.445	8.49763	403.121	8.65507	365.759	8.51475	IPR007877	GO:0015081, GO:0016021
TraesCS3A02G525100		3A	739517140	739519207	TaAffx.32294.1.S1_at; TaAffx.70160.1.A1_at	75.9234	6.24647	690.021	9.4305	515.445	9.00968	404.154	8.65876	314.143	8.29528	IPR008598, IPR033347
TraesCS3A02G525200	Protein PIN-LIKES 2 [Source:Projected from Arabidopsis thaliana (AT1G71090) UniProtKB/Swiss-Prot;Acc:Q9C999]	3A	739520341	739522510	TaAffx.54517.1.S1_at	15.5081	3.95495	101.084	6.65941	102.694	6.68221	32.2038	5.00916	35.8665	5.16457	IPR004776, IPR039305	GO:0005789, GO:0009733, GO:0010252, GO:0010311, GO:0010329, GO:0015081, GO:0016021, GO:0040009, GO:0055085
TraesCS3A02G525300		3A	739545022	739545866
TraesCS3A02G525400		3A	739557732	739560684	TaAffx.122522.1.S1_at	22.0106	4.46013	36.1877	5.17743	70.064	6.1306	96.7486	6.59617	60.3656	5.91566	IPR002885, IPR011990	GO:0005515, GO:0005739, GO:0008380
TraesCS3A02G525500		3A	739560488	739561553
TraesCS3A02G525600	Transcription initiation factor IIA subunit 2 [Source:UniProtKB/TrEMBL;Acc:A0A1D5V9W2]	3A	739567485	739569594												IPR003194, IPR009083, IPR009088, IPR015871, IPR015872	GO:0005672, GO:0006367
TraesCS3A02G525700	Pathogenesis-related protein 1 [Source:UniProtKB/TrEMBL;Acc:V9I1C0]	3A	739640193	739640917												IPR001283, IPR014044, IPR035940	GO:0005615
TraesCS3A02G525800		3A	739665839	739667339												IPR003194, IPR009083, IPR009088, IPR015871, IPR015872	GO:0005672, GO:0006367
TraesCS3A02G525900		3A	739671420	739673916												IPR007658, IPR025315	GO:0016021
TraesCS3A02G526000		3A	739733689	739738077	Ta.11318.2.S1_at; TaAffx.78794.1.S1_at; TaAffx.78794.1.S1_x_at	33.4312	5.06313	186.2	7.54071	170.088	7.41014	192.009	7.58503	207.917	7.69987	IPR040353
TraesCS3A02G526100		3A	739950839	739951114	TaAffx.64705.1.S1_s_at	10.0831	3.33387	710.785	9.47327	180.52	7.49602	355.383	8.47323	647.04	9.33771
TraesCS3A02G526200		3A	739990616	739991571												IPR006044, IPR006045, IPR011051, IPR014710	GO:0045735
TraesCS3A02G526400		3A	740027160	740028074												IPR006121, IPR036163	GO:0030001, GO:0046872
TraesCS3A02G526500		3A	740077157	740079127	Ta.13454.1.S1_at; TaAffx.9588.1.S1_at; TaAffx.9588.1.S1_x_at	17.1404	4.09933	65.2628	6.02819	57.1198	5.83592	57.1429	5.8365	24.6362	4.62271	IPR006044, IPR006045, IPR011051, IPR014710	GO:0045735
TraesCS3A02G526600	LUX-A [Source:UniProtKB/TrEMBL;Acc:W0M071]	3A	740112688	740114193												IPR001005, IPR006447, IPR009057, IPR017930	GO:0003677, GO:0003700, GO:0005634, GO:0006355
TraesCS3A02G528900		3A	742765672	742770201	Ta.30798.3.S1_at	1099.88	10.1031	34.6278	5.11386	884.335	9.78845	723.718	9.49928	472.751	8.88494	IPR001096, IPR043577	GO:0006508, GO:0008233
TraesCS3A02G529000		3A	742784631	742789375	TaAffx.90226.1.S1_at	74.4969	6.21911	176.035	7.45972	105.932	6.72699	75.8779	6.24561	85.0038	6.40946	IPR001810, IPR032675, IPR036047	GO:0005515
TraesCS3A02G529100	Probable pectinesterase 67 [Source:Projected from Arabidopsis thaliana (AT3G17060) UniProtKB/Swiss-Prot;Acc:Q9LSP1]	3A	742792092	742793773												IPR000070, IPR011050, IPR012334	GO:0030599, GO:0042545
TraesCS3A02G529200		3A	742871035	742872969												IPR001128, IPR002401, IPR017972, IPR036396	GO:0004497, GO:0005506, GO:0016021, GO:0016705, GO:0020037, GO:0055114
TraesCS3A02G529300		3A	742875108	742877001												IPR002110, IPR020683, IPR026961, IPR036770	GO:0005515
TraesCS3A02G529400		3A	742928946	742929923
TraesCS3A02G529500		3A	742930008	742930391												IPR002213	GO:0016758
TraesCS3A02G529600		3A	742931040	742931438
TraesCS3A02G529700		3A	743101552	743105503												IPR002110, IPR020683, IPR026961, IPR036770	GO:0005515, GO:0016021
TraesCS3A02G529800	Kinetochore protein SPC25 homolog [Source:Projected from Arabidopsis thaliana (AT3G48210) UniProtKB/Swiss-Prot;Acc:Q93VK9]	3A	743128092	743131397												IPR013255
TraesCS3A02G529900		3A	743137444	743140077												IPR032675	GO:0030554, GO:0032550, GO:0032559, GO:0043531
TraesCS3A02G530000	AP-3 complex subunit beta [Source:UniProtKB/TrEMBL;Acc:A0A341SAM5]	3A	743184935	743193149	TaAffx.53179.1.S1_at; TaAffx.74679.1.S1_at	22.6884	4.50389	100.141	6.64589	92.2877	6.52807	131.234	7.036	117.085	6.87141	IPR002553, IPR011989, IPR016024, IPR026739, IPR026740, IPR029390	GO:0006886, GO:0016192, GO:0030117, GO:0030123
TraesCS3A02G530100		3A	743272364	743275157	Ta.4265.1.A1_at	111.691	6.80336	123.717	6.95089	407.682	8.6713	373.24	8.54396	176.29	7.46181	IPR004383, IPR006638, IPR007197, IPR013785, IPR027492, IPR040072	GO:0003824, GO:0005737, GO:0006364, GO:0008173, GO:0030488, GO:0051536, GO:0070475
TraesCS3A02G530200		3A	743377005	743380721	TaAffx.114172.1.S1_s_at	94.4587	6.56161	30.8049	4.94509	70.1106	6.13156	158.245	7.30602	205.664	7.68414	IPR000719, IPR008271, IPR011009, IPR017441	GO:0004672, GO:0004674, GO:0005524, GO:0006468, GO:0030554, GO:0032550, GO:0032559, GO:0097367
TraesCS3A02G530300		3A	743557125	743557628
TraesCS3A02G530400		3A	743673882	743675520	Ta.3170.2.S1_at	1025.03	10.0014	4095.75	11.9999	6796.32	12.7305	9364.87	13.193	7185.06	12.8108	IPR000289, IPR012340, IPR028626	GO:0000028, GO:0003735, GO:0005840, GO:0006412, GO:0022627, GO:0030490
TraesCS3A02G530600		3A	743757820	743759977	Ta.24712.2.S1_at; Ta.24712.2.S1_x_at	521.438	9.02635	1914.91	10.9031	2547.1	11.3146	2778.15	11.4399	3043.59	11.5716	IPR000289, IPR012340, IPR028626	GO:0000028, GO:0003735, GO:0005516, GO:0005840, GO:0006412, GO:0022627, GO:0030490
TraesCS3A02G530700		3A	743872553	743875195												IPR006502
TraesCS3A02G530800		3A	743988067	743988916	Ta.27457.1.S1_x_at	11945.1	13.5441	132125	17.0115	119582	16.8676	28121.9	14.7794	24623.8	14.5878	IPR000347	GO:0005829, GO:0046872, GO:0072593
TraesCS3A02G530900		3A	744055472	744058792												IPR008570, IPR014041, IPR036388, IPR036390	GO:0000814, GO:0071985
TraesCS3A02G531000		3A	744193802	744195440												IPR006044, IPR006045, IPR011051, IPR014710	GO:0045735
TraesCS3A02G531100		3A	744214867	744216535												IPR006044, IPR006045, IPR011051, IPR014710	GO:0045735
TraesCS3A02G531200		3A	744262224	744263227	Ta.27457.8.S1_x_at	6257.17	12.6113	82897.6	16.339	43002.5	15.3921	26042.2	14.6686	26580.5	14.6981	IPR000347	GO:0046872
TraesCS3A02G531300		3A	744266478	744267259	Ta.27457.5.S1_x_at	1374.7	10.4249	325.626	8.34707	183.393	7.51879	31347	14.936	27582.7	14.7515	IPR000347	GO:0046872
TraesCS3A02G531400		3A	744286755	744287543												IPR000347	GO:0046872
TraesCS3A02G531500		3A	744304097	744304579
TraesCS3A02G531600		3A	744377724	744380424												IPR000266, IPR012340, IPR019984	GO:0003735, GO:0005840, GO:0006412
TraesCS3A02G531700		3A	744390245	744392753												IPR002222, IPR005732, IPR020934, IPR023575	GO:0003723, GO:0003735, GO:0005739, GO:0005840, GO:0006412, GO:0015935
TraesCS3A02G531800		3A	744433944	744445665													GO:0030554, GO:0032550, GO:0032559, GO:0097367,
TraesCS3A02G531900	Very-long-chain (3R)-3-hydroxyacyl-CoA dehydratase [Source:UniProtKB/TrEMBL;Acc:A0A1D5VCD6]	3A	744664249	744666619	Ta.20902.1.S1_a_at; Ta.20902.1.S1_x_at	86.9819	6.44264	328.478	8.35965	297.386	8.21619	373.492	8.54493	308.46	8.26894	IPR007482	GO:0005789, GO:0006633, GO:0016021, GO:0102158, GO:0102343, GO:0102344, GO:0102345
TraesCS3B02G006700		3B	3601450	3607208	Ta.10270.1.A1_at; Ta.10270.2.A1_a_at	244.38	7.93298	98.5724	6.62311	56.0731	5.80924	91.2198	6.51128	157.681	7.30086	IPR004255, IPR009721	GO:0004144, GO:0005886, GO:0016740, GO:0016746, GO:0019432, GO:0045017, GO:0047196
TraesCS3B02G006800		3B	3628392	3629152	TaAffx.54199.1.S1_at	57.6187	5.84847	104.658	6.70954	56.8161	5.82823	101.255	6.66184	137.913	7.10761		GO:0016020, GO:0016021
TraesCS3B02G006900	WAT1-related protein [Source:UniProtKB/TrEMBL;Acc:A0A077RP08]	3B	3635277	3637270	Ta.9552.1.A1_at; Ta.9552.2.S1_at	215.61	7.75228	25.2074	4.65578	15.1187	3.91827	14.6915	3.87691	10.4676	3.38785	IPR000620, IPR030184	GO:0005886, GO:0016020, GO:0016021, GO:0022857, GO:0055085
TraesCS3B02G007000		3B	3661385	3662172												IPR000719, IPR008271, IPR011009	GO:0004672, GO:0005524, GO:0006468, GO:0030554, GO:0032550, GO:0032559
TraesCS3B02G007100		3B	3663183	3664058												IPR001611, IPR032675	GO:0005515, GO:0030554, GO:0032550, GO:0032559
TraesCS3B02G007200		3B	3665420	3667378	Ta.28317.1.S1_at; Ta.28317.1.S1_x_at	754.13	9.55867	1668.61	10.7044	2695.07	11.3961	3238.45	11.6611	3260.53	11.6709	IPR000702, IPR002359, IPR020040, IPR036789	GO:0002181, GO:0003735, GO:0005840, GO:0006412, GO:0019843, GO:0022625
TraesCS3B02G007400	MFT-3B-2 [Source:UniProtKB/TrEMBL;Acc:A0A0K2RW47]	3B	3863692	3868727	Ta.10074.1.S1_at	8.79187	3.13617	14.9729	3.90428	19.6297	4.29496	14.0813	3.81571	20.1813	4.33495	IPR001858, IPR008914, IPR035810, IPR036610
TraesCS3B02G007500		3B	3878183	3880231	TaAffx.28859.1.S1_s_at	27.7525	4.79455	63.1605	5.98095	86.6857	6.43772	21.1282	4.4011	39.3493	5.29827	IPR004158
TraesCS3B02G007600		3B	3893594	3896553												IPR009772
TraesCS3B02G007700		3B	3898802	3900540	Ta.19622.1.S1_at	10.5381	3.39755	37.3674	5.22371	76.6836	6.26085	36.2885	5.18144	30.7302	4.94158	IPR011598, IPR036638	GO:0046983
TraesCS3B02G007900		3B	3910602	3912257												IPR006016, IPR014729
TraesCS3B02G008000		3B	4178142	4179782
TraesCS3B02G008100	Peptidyl-prolyl cis-trans isomerase [Source:UniProtKB/TrEMBL;Acc:A0A077RR71]	3B	4202094	4203405												IPR002130, IPR029000	GO:0000413, GO:0003755, GO:0009507, GO:0016853
TraesCS3B02G008200		3B	4206070	4206868												IPR006501, IPR034086, IPR035513	GO:0004857, GO:0030554, GO:0032550, GO:0032559, GO:0043086, GO:0046910, GO:0097367
TraesCS3B02G008300		3B	4214230	4214757	TaAffx.12732.1.S1_at	20.5362	4.3601	48.2	5.59096	12.8	3.67807	9.98529	3.3198	27.006	4.75521	IPR006501, IPR035513	GO:0004857, GO:0030554, GO:0032550, GO:0032559, GO:0043086
TraesCS3B02G008400		3B	4220275	4221062	TaAffx.5670.2.S1_s_at	29.2544	4.87058	62.36	5.96255	19.4753	4.28357	9.13522	3.19144	8.90559	3.15471	IPR006501, IPR035513	GO:0004857, GO:0030554, GO:0032550, GO:0032559, GO:0043086
TraesCS3B02G008600		3B	4322974	4327039												IPR000719, IPR001245, IPR008271, IPR011009, IPR017441	GO:0000166, GO:0004672, GO:0004674, GO:0005524, GO:0006468, GO:0016020, GO:0016021, GO:0016301, GO:0016310, GO:0016740, GO:0030554, GO:0032550, GO:0032559
TraesCS3B02G008700		3B	4327923	4331959	Ta.1383.1.S1_s_at	190.787	7.57582	1346.82	10.3953	1766.77	10.7869	1272.25	10.3132	1378.01	10.4284	IPR002155, IPR016039, IPR020610, IPR020613, IPR020615, IPR020616, IPR020617	GO:0003824, GO:0003985, GO:0003988, GO:0006635, GO:0016740, GO:0016746, GO:0016747
TraesCS3B02G008800		3B	4332116	4332563												IPR006501, IPR035513	GO:0004857, GO:0030554, GO:0032550, GO:0032559, GO:0043086, GO:0097367
TraesCS3B02G008900		3B	4334031	4334755	Ta.9518.1.S1_at	17.4781	4.12748	24.7767	4.63091	12.0827	3.59487	20.34	4.34624	33.3187	5.05826	IPR006501, IPR035513	GO:0004857, GO:0030554, GO:0032550, GO:0032559, GO:0043086
TraesCS3B02G009000		3B	4418072	4418989
TraesCS3B02G009100		3B	4420808	4421692
TraesCS3B02G009200		3B	4433683	4434096
TraesCS3B02G009300		3B	4458926	4459506
TraesCS3B02G009400		3B	4490335	4490736
TraesCS3B02G009500	WAT1-related protein [Source:UniProtKB/TrEMBL;Acc:A0A341S635]	3B	4513266	4520230												IPR000620, IPR030184	GO:0016020, GO:0016021, GO:0022857, GO:0055085
TraesCS3B02G009600		3B	4553317	4554575	Ta.13161.1.S1_at	507.515	8.98731	15.1707	3.92321	94.2637	6.55863	240.628	7.91066	47.4405	5.56805	IPR038793
TraesCS3B02G009700		3B	4555982	4556578												IPR000864, IPR036354	GO:0004857, GO:0004866, GO:0004867, GO:0009611, GO:0061135
TraesCS3B02G009800		3B	4562430	4564853												IPR001810, IPR017451, IPR036047	GO:0005515
TraesCS3B02G009900		3B	4662107	4663478
TraesCS3B02G010100	MFT-3B-1 [Source:UniProtKB/TrEMBL;Acc:A0A0K2RVI9]	3B	4743748	4747536	Ta.10074.1.S1_at	8.79187	3.13617	14.9729	3.90428	19.6297	4.29496	14.0813	3.81571	20.1813	4.33495	IPR001858, IPR008914, IPR035810, IPR036610
TraesCS3B02G010200		3B	4756806	4765487	TaAffx.28859.1.S1_s_at	27.7525	4.79455	63.1605	5.98095	86.6857	6.43772	21.1282	4.4011	39.3493	5.29827	IPR004158
TraesCS3B02G010300		3B	4780520	4783479												IPR009772	GO:0005737, GO:0051301
TraesCS3B02G010400		3B	4785726	4787542	Ta.19622.1.S1_at	10.5381	3.39755	37.3674	5.22371	76.6836	6.26085	36.2885	5.18144	30.7302	4.94158	IPR011598, IPR036638	GO:0001228, GO:0005634, GO:0045944, GO:0046983
TraesCS3B02G010600		3B	4799215	4800229												IPR006016, IPR014729
TraesCS3B02G010700		3B	5035113	5037076
TraesCS3B02G010800		3B	5069599	5070289	TaAffx.12732.1.S1_at	20.5362	4.3601	48.2	5.59096	12.8	3.67807	9.98529	3.3198	27.006	4.75521	IPR006501, IPR034086, IPR035513	GO:0004857, GO:0030554, GO:0032550, GO:0032559, GO:0043086, GO:0046910
TraesCS3B02G010900		3B	5075719	5076422	TaAffx.5670.2.S1_s_at	29.2544	4.87058	62.36	5.96255	19.4753	4.28357	9.13522	3.19144	8.90559	3.15471	IPR006501, IPR035513	GO:0004857, GO:0030554, GO:0032550, GO:0032559, GO:0043086, GO:0097367
TraesCS3B02G011000		3B	5082478	5083557
TraesCS3B02G011100		3B	5083608	5083907
TraesCS3B02G011300		3B	5169036	5170934	Ta.28317.1.S1_at; Ta.28317.1.S1_x_at	754.13	9.55867	1668.61	10.7044	2695.07	11.3961	3238.45	11.6611	3260.53	11.6709	IPR000702, IPR002359, IPR020040, IPR036789	GO:0003735, GO:0005840, GO:0006412, GO:0019843
TraesCS3B02G011400		3B	5172248	5173123												IPR001611, IPR032675	GO:0005515, GO:0030554, GO:0032550, GO:0032559
TraesCS3B02G011500		3B	5174134	5174921												IPR000719, IPR008271, IPR011009	GO:0004672, GO:0005524, GO:0006468, GO:0030554, GO:0032550, GO:0032559
TraesCS3B02G011600	WAT1-related protein [Source:UniProtKB/TrEMBL;Acc:A0A1D5WBS2]	3B	5199156	5201287	Ta.9552.1.A1_at; Ta.9552.2.S1_at	215.61	7.75228	25.2074	4.65578	15.1187	3.91827	14.6915	3.87691	10.4676	3.38785	IPR000620, IPR030184	GO:0016020, GO:0016021, GO:0022857
TraesCS3B02G011700		3B	5207131	5207968	TaAffx.54199.1.S1_at	57.6187	5.84847	104.658	6.70954	56.8161	5.82823	101.255	6.66184	137.913	7.10761		GO:0016021
TraesCS3B02G011800		3B	5230206	5234785	Ta.10270.1.A1_at; Ta.10270.2.A1_a_at	244.38	7.93298	98.5724	6.62311	56.0731	5.80924	91.2198	6.51128	157.681	7.30086	IPR004255, IPR009721	GO:0004144, GO:0045017
TraesCS3B02G011900		3B	5321732	5323640	Ta.28317.3.S1_at; Ta.28317.3.S1_x_at	80.9081	6.33821	153.463	7.26175	130.729	7.03043	174.463	7.44677	237.598	7.89238	IPR000702, IPR002359, IPR020040, IPR036789	GO:0002181, GO:0003735, GO:0005840, GO:0006412, GO:0019843, GO:0022625
TraesCS3B02G012000		3B	5405970	5406674
TraesCS3B02G012100		3B	5408351	5408920
TraesCS3B02G129200		3B	109942373	109943735	Ta.21394.1.S1_at; Ta.21394.2.A1_x_at	25.6778	4.68245	30.5321	4.93226	10.0021	3.32224	5.36433	2.4234	14.2805	3.83597	IPR039923
TraesCS3B02G129300		3B	109944334	109947499												IPR029058
TraesCS3B02G129400		3B	110227707	110230658												IPR000086, IPR015797	GO:0016787
TraesCS3B02G129500	Non-specific serine/threonine protein kinase [Source:UniProtKB/TrEMBL;Acc:A0A1D5W8D2]	3B	110445444	110454553	Ta.6269.1.S1_at	317.586	8.311	1375.7	10.426	1306.53	10.3515	1372.07	10.4221	1236.74	10.2723	IPR000719, IPR000961, IPR008271, IPR011009, IPR017441, IPR017892	GO:0001883, GO:0004672, GO:0004674, GO:0005524, GO:0006468, GO:0030554, GO:0032550, GO:0032559, GO:0097367
TraesCS3B02G129600		3B	110735973	110736705												IPR013320, IPR014895
TraesCS3B02G134600		3B	116648915	116649178
TraesCS3B02G134700		3B	116680930	116689055	Ta.6929.1.A1_at; Ta.6929.2.S1_at	21.3256	4.41452	107.802	6.75223	60.2057	5.91183	78.0906	6.28708	67.4073	6.07483	IPR002110, IPR011990, IPR019734, IPR020683, IPR036770	GO:0005515
TraesCS3B02G134900		3B	117552189	117553966												IPR000300, IPR036691	GO:0004439, GO:0016787, GO:0034485, GO:0046856
TraesCS3B02G135000		3B	117554843	117557271												IPR011009	GO:0030554, GO:0032550, GO:0032559,
TraesCS3B02G135100		3B	117574881	117595547												IPR028103, IPR028107
TraesCS3B02G135200		3B	117600515	117601117												IPR002562, IPR012337, IPR036397	GO:0003676, GO:0005634, GO:0005737, GO:0006139, GO:0008408, GO:0090305
TraesCS3B02G135300		3B	117720854	117726468												IPR003657, IPR036576	GO:0003700, GO:0005634, GO:0006355, GO:0043565
TraesCS3B02G135400	Orthologue of the Arabidopsis GIGANTEA, Regulation of circadian rhythm and flowering time, Photoperiodic control of flowering, Osmotic stress respons [Source: Projected from Oryza sativa (Os01g0182600)]	3B	117923139	117931738	Ta.10215.1.S1_at	522.264	9.02864	1266.7	10.3069	1666.41	10.7025	4366.8	12.0924	4317.76	12.0761	IPR026211	GO:0005634, GO:0042752, GO:0048586, GO:2000028
TraesCS3B02G135500		3B	118136453	118138515
TraesCS3B02G135600		3B	118251232	118253003
TraesCS3B02G135700		3B	118504480	118506983													GO:0016020, GO:0016021
TraesCS3B02G154900	Pentatricopeptide repeat-containing protein DOT4, chloroplastic [Source:Projected from Arabidopsis thaliana (AT4G18750) UniProtKB/Swiss-Prot;Acc:Q9SN39]	3B	147543746	147546991												IPR002885, IPR011990, IPR032867	GO:0005515, GO:0008270, GO:0009507, GO:0010087, GO:0010305, GO:0010588, GO:0048366, GO:1900865
TraesCS3B02G155000		3B	147547416	147551517												IPR001680, IPR015943, IPR017986, IPR019775, IPR036322	GO:0005515
TraesCS3B02G155100		3B	147607442	147608906	Ta.1930.1.S1_x_at; Ta.1930.2.S1_a_at	8.00875	3.00158	24.0238	4.58639	16.68	4.06005	15.0564	3.9123	13.132	3.71502		GO:0016020, GO:0016021
TraesCS3B02G155200		3B	147872442	147873029												IPR002100, IPR033897, IPR036879	GO:0000976, GO:0000977, GO:0000981, GO:0000982, GO:0000987, GO:0003677, GO:0005634, GO:0006351, GO:0008134, GO:0043565, GO:0045944, GO:0046983
TraesCS3B02G155300	UMP-CMP kinase [Source:UniProtKB/TrEMBL;Acc:A0A1D5W7Y6]	3B	147873125	147876613	TaAffx.12584.1.S1_at	16.675	4.05961	84.4811	6.40056	108.228	6.75794	71.0952	6.15168	59.0657	5.88425	IPR000850, IPR006266, IPR027417, IPR033690	GO:0000166, GO:0004017, GO:0004127, GO:0005524, GO:0005634, GO:0005737, GO:0006139, GO:0006207, GO:0006221, GO:0009041, GO:0016301, GO:0016310, GO:0016740, GO:0019205, GO:0030554, GO:0032550, GO:0032559, GO:0046940, GO:0097367
TraesCS3B02G155500		3B	147933340	147934739	Ta.2001.1.S1_at	8.7175	3.12391	32.3871	5.01735	64.4784	6.01074	56.9907	5.83266	50.7172	5.6644	IPR001077, IPR012967, IPR016461, IPR029063, IPR036388, IPR036390	GO:0008171, GO:0046983
TraesCS3B02G155600		3B	148291346	148301137												IPR006943, IPR040225	GO:0009639, GO:0009959
TraesCS3B02G155700	DNA-directed DNA polymerase [Source:Projected from Arabidopsis thaliana (AT1G78650) UniProtKB/TrEMBL;Acc:Q9SYL7]	3B	148478929	148484144												IPR019038, IPR041913	GO:0003887, GO:0005634, GO:0006260, GO:0006271, GO:0006297, GO:0043625, GO:1904161
TraesCS3B02G155800	Carboxypeptidase [Source:UniProtKB/TrEMBL;Acc:A0A077RXR9]	3B	148498167	148500304												IPR001563, IPR018202, IPR029058, IPR033124	GO:0004180, GO:0004185, GO:0005773, GO:0006508, GO:0008233, GO:0016787
TraesCS3B02G155900		3B	148543229	148547081	TaAffx.121334.1.S1_at; Ta.26151.1.A1_at	10.5253	3.39579	181.094	7.50059	96.1111	6.58663	342.331	8.41925	271.645	8.08558	IPR000209, IPR010259, IPR015500, IPR022398, IPR023828, IPR034197, IPR036852, IPR037045, IPR041469	GO:0004252, GO:0006508, GO:0008233, GO:0008236, GO:0016787
TraesCS3B02G156000		3B	148580715	148583530	TaAffx.121334.1.S1_at	9.05937	3.17941	35.7605	5.16029	31.4393	4.9745	5.98355	2.581	20.6019	4.3647	IPR000209, IPR010259, IPR015500, IPR022398, IPR023828, IPR034197, IPR036852, IPR037045	GO:0004252, GO:0006508
TraesCS3B02G156100		3B	148621971	148624808	TaAffx.121334.1.S1_at	9.05937	3.17941	35.7605	5.16029	31.4393	4.9745	5.98355	2.581	20.6019	4.3647	IPR000209, IPR010259, IPR015500, IPR022398, IPR023828, IPR034197, IPR036852, IPR037045	GO:0004252, GO:0006508
TraesCS3B02G156200		3B	148658708	148660750	TaAffx.121334.1.S1_at	9.05937	3.17941	35.7605	5.16029	31.4393	4.9745	5.98355	2.581	20.6019	4.3647	IPR000209, IPR010259, IPR015500, IPR022398, IPR034197, IPR036852, IPR037045	GO:0004252, GO:0006508
TraesCS3B02G156300		3B	148998829	149001574	Ta.1708.1.A1_at	12.7494	3.67235	71.2453	6.15472	78.0837	6.28695	49.4321	5.62738	28.7528	4.84563
TraesCS3B02G156500		3B	149226154	149228345	Ta.5483.1.S1_at	23.8337	4.57493	112.648	6.81567	203.927	7.67191	236.693	7.88687	265.513	8.05264
TraesCS3B02G156600		3B	149453513	149456182	Ta.6604.1.S1_at	75.6287	6.24086	708.991	9.46962	779.9	9.60715	1139.72	10.1545	1308.53	10.3537	IPR008540, IPR033264	GO:0003700, GO:0006351, GO:0009742
TraesCS3B02G156700		3B	149462934	149464345												IPR000425, IPR022357, IPR023271, IPR034294	GO:0015267, GO:0016020, GO:0016021, GO:0055085
TraesCS3B02G156800	Serine/threonine-protein phosphatase 5 [Source:Projected from Arabidopsis thaliana (AT2G42810) UniProtKB/Swiss-Prot;Acc:Q84XU2]	3B	149464679	149470714	Ta.29613.1.S1_at	77.0606	6.26792	235.483	7.87948	294.756	8.20338	272.986	8.09268	347.744	8.44188	IPR001440, IPR004843, IPR006186, IPR011236, IPR011990, IPR013026, IPR013235, IPR019734, IPR029052, IPR041753	GO:0004721, GO:0004722, GO:0005515, GO:0005634, GO:0005635, GO:0005737, GO:0005829, GO:0006470, GO:0009506, GO:0010017, GO:0010019, GO:0016787, GO:0030176, GO:0046686, GO:0046872, GO:0046906, GO:1902325
TraesCS3B02G205700		3B	240407408	240408409	Ta.9092.1.S1_at	416.359	8.70168	1212.65	10.244	717.321	9.48648	865.536	9.75745	498.035	8.9601	IPR008801	GO:0005576, GO:0009506, GO:0019722
TraesCS3B02G205800		3B	240531262	240532098												IPR039274	GO:0009909, GO:0045841, GO:0072686
TraesCS3B02G205900		3B	240591119	240597435	Ta.2231.1.S1_at	194.245	7.60173	1253.15	10.2913	1527.89	10.5773	1774.1	10.7929	1441.47	10.4933	IPR000571, IPR036855	GO:0003677, GO:0003729, GO:0046872
TraesCS3B02G206000		3B	240800913	240804518													GO:0016020, GO:0016021
TraesCS3B02G206100		3B	241391081	241397247												IPR000172, IPR007867, IPR012132, IPR031206, IPR036188	GO:0016614, GO:0050660, GO:0055114
TraesCS3B02G206200		3B	241399314	241401729
TraesCS3B02G206300		3B	241662054	241662437
TraesCS3B02G206400		3B	241676647	241683603	Ta.20937.1.S1_at; TaAffx.9029.1.S1_at	108.977	6.76788	1067.84	10.0605	684.293	9.41847	826.476	9.69083	856.089	9.74162	IPR000571, IPR036855	GO:0003677, GO:0003729, GO:0046872
TraesCS3B02G206500		3B	242161978	242166576												IPR000719, IPR008271, IPR011009, IPR017441	GO:0000166, GO:0004672, GO:0004674, GO:0005524, GO:0006468, GO:0016301, GO:0016310, GO:0016740, GO:0030554, GO:0032550, GO:0032559
TraesCS3B02G206600		3B	242193122	242201900												IPR000719, IPR008271, IPR011009, IPR011989, IPR016024, IPR017441	GO:0000166, GO:0003677, GO:0004672, GO:0005524, GO:0006334, GO:0006468, GO:0016301, GO:0016310, GO:0016740, GO:0030554, GO:0032550, GO:0032559
TraesCS3B02G206700		3B	242207782	242214901	TaAffx.59364.1.S1_at	157.487	7.29909	47.6225	5.57357	50.9533	5.6711	35.6187	5.15456	74.6298	6.22168	IPR001453, IPR002500, IPR014729, IPR036425	GO:0003824
TraesCS3B02G208500		3B	244623098	244626121	Ta.21179.1.S1_at	76.8381	6.26375	1003.87	9.97136	909.758	9.82934	947.505	9.88799	1008.92	9.97859	IPR000760, IPR011809, IPR020583	GO:0004401, GO:0046854, GO:0046855
TraesCS3B02G208600		3B	244658581	244661606												IPR036291	GO:0009507
TraesCS3B02G208700		3B	244661859	244662503
TraesCS3B02G208800		3B	244984912	244996448	Ta.7736.1.A1_at; Ta.7736.2.S1_at	61.1834	5.93507	580.013	9.17994	509.633	8.99331	309.383	8.27325	279.572	8.12708	IPR001650, IPR011545, IPR014001, IPR014014, IPR022059, IPR027417	GO:0003676, GO:0005524, GO:0030554, GO:0032550, GO:0032559
TraesCS3B02G209100		3B	245357884	245359927	TaAffx.44338.1.S1_at	211.874	7.72706	2200.6	11.1037	2073.31	11.0177	1227.5	10.2615	325.839	8.34801	IPR006634, IPR042512	GO:0016020, GO:0016021
TraesCS3B02G209200		3B	245506233	245509697	Ta.4830.1.S1_a_at; Ta.4830.2.A1_at; Ta.4830.3.S1_x_at	61.8342	5.95033	56.7467	5.82646	49.6486	5.63368	52.1044	5.70333	52.0837	5.70276	IPR006634, IPR042512	GO:0016020, GO:0016021
TraesCS3B02G209300		3B	245509889	245517984	TaAffx.120728.1.S1_at	32.415	5.01859	56.3015	5.8151	94.3398	6.5598	119.247	6.89781	141.307	7.14269	IPR001296, IPR041693	GO:0016020, GO:0016021, GO:0016757
TraesCS3B02G209400		3B	245903471	245905721	Ta.7532.1.S1_a_at	44.7175	5.48277	637.599	9.31651	934.249	9.86766	769.824	9.58838	846.879	9.72601	IPR012340, IPR013970	GO:0003677, GO:0005634, GO:0006260, GO:0006281, GO:0006310
TraesCS3B02G209500		3B	245923939	245947809													GO:0016020, GO:0016021
TraesCS3B02G209600	Peroxidase [Source:UniProtKB/TrEMBL;Acc:A0A1D5VW42]	3B	245946722	245949280	Ta.16155.1.A1_at	6.52062	2.70501	5.57138	2.47803	27.6128	4.78727	28.2544	4.82041	24.9566	4.64135	IPR000823, IPR002016, IPR010255, IPR019793, IPR019794, IPR033905	GO:0004601, GO:0005576, GO:0006979, GO:0020037, GO:0042744, GO:0046872, GO:0055114
TraesCS3B02G209700	Peroxidase [Source:UniProtKB/TrEMBL;Acc:W5D5A5]	3B	245963073	245965014	TaAffx.12173.1.A1_at	32.2794	5.01254	78.7794	6.29975	38.0631	5.25032	27.5394	4.78343	11.0088	3.46058	IPR000823, IPR002016, IPR010255, IPR019793, IPR019794, IPR033905	GO:0004601, GO:0005576, GO:0006979, GO:0016491, GO:0020037, GO:0042744, GO:0046872, GO:0055114, GO:0098869
TraesCS3B02G209800	Peroxidase [Source:UniProtKB/TrEMBL;Acc:W5CYH6]	3B	245968738	245970622	Ta.10662.1.S1_a_at	6.88625	2.78372	3.86631	1.95096	12.9376	3.6935	5.70243	2.51158	6.33435	2.6632	IPR000823, IPR002016, IPR010255, IPR019793, IPR019794, IPR033905	GO:0004601, GO:0005576, GO:0006979, GO:0016491, GO:0020037, GO:0042744, GO:0046872, GO:0055114, GO:0098869
TraesCS3B02G209900	Peroxidase [Source:UniProtKB/TrEMBL;Acc:A0A077RRC4]	3B	246127735	246130161	Ta.9451.1.S1_x_at; Ta.9451.2.S1_x_at	166.218	7.37693	187.888	7.55373	189.222	7.56393	95.7676	6.58147	104.253	6.70394	IPR000823, IPR002016, IPR010255, IPR019793, IPR019794, IPR033905	GO:0004601, GO:0005576, GO:0006979, GO:0016491, GO:0020037, GO:0042744, GO:0046872, GO:0055114, GO:0098869
TraesCS3B02G210000	Peroxidase [Source:UniProtKB/TrEMBL;Acc:W5CY42]	3B	246145438	246147344	Ta.8828.3.S1_a_at	148.609	7.21538	23.3616	4.54607	19.3161	4.27173	32.695	5.031	37.4651	5.22748	IPR000823, IPR002016, IPR010255, IPR019793, IPR019794, IPR033905	GO:0004601, GO:0005576, GO:0006979, GO:0016491, GO:0020037, GO:0042744, GO:0046872, GO:0055114, GO:0098869
TraesCS3B02G210100		3B	246149304	246152567												IPR002885, IPR011990	GO:0005515
TraesCS3B02G210200	Mediator of RNA polymerase II transcription subunit 27 [Source:Projected from Arabidopsis thaliana (AT3G09180) UniProtKB/Swiss-Prot;Acc:Q8RWM3]	3B	246152795	246159958												IPR021627	GO:0005634, GO:0016592
TraesCS3B02G210300		3B	246160109	246164013	TaAffx.52861.1.S1_at	27.7694	4.79542	197.95	7.62899	172.147	7.42749	135.132	7.07823	120.134	6.9085	IPR003851	GO:0003677, GO:0003700, GO:0005634, GO:0006355
TraesCS3B02G210400		3B	246503573	246504813	TaAffx.5526.1.S1_at	171.826	7.4248	382.371	8.57883	501.695	8.97067	402.406	8.65251	387.441	8.59783		GO:0016021
TraesCS3B02G210900		3B	249999689	250007611												IPR002110, IPR011990, IPR013026, IPR013105, IPR019734, IPR020683, IPR036770	GO:0005515
TraesCS3B02G211000		3B	250135493	250140947	Ta.6202.1.S1_at	541.473	9.08075	4995.67	12.2865	4711.66	12.202	3645	11.8317	3824.91	11.9012		GO:0016020, GO:0016021,
TraesCS3B02G211100		3B	250144596	250146343	TaAffx.24156.1.S1_at	25.05	4.64674	73.0304	6.19042	64.4333	6.00974	27.0915	4.75977	31.2301	4.96486	IPR039615, IPR039820	GO:0009638
TraesCS3B02G211200		3B	250274084	250279556	Ta.465.1.S1_at	364.706	8.51059	3780.19	11.8842	4541.37	12.1489	4544.39	12.1499	4712.95	12.2024	IPR001251, IPR011074, IPR036273, IPR036865	GO:0008526, GO:0015914, GO:0120009,
TraesCS3B02G211300	Pre-mRNA-splicing factor SPF27 homolog [Source:Projected from Arabidopsis thaliana (AT3G18165) UniProtKB/Swiss-Prot;Acc:Q949S9]	3B	250461917	250468134	Ta.886.1.S1_at	81.2556	6.3444	513.499	9.00422	374.153	8.54749	498.527	8.96153	493.742	8.94761	IPR008409	GO:0000974, GO:0005634, GO:0005730, GO:0006397, GO:0008380, GO:0009870, GO:0010204, GO:0042742, GO:0050832, GO:0071013
TraesCS3B02G211400		3B	250571818	250573420												IPR002938, IPR010253, IPR011774, IPR011777, IPR036188	GO:0006508, GO:0008236, GO:0009535, GO:0015979, GO:0015995, GO:0016020, GO:0016628, GO:0045550, GO:0051188, GO:0055114, GO:0071949, GO:0102067
TraesCS3B02G211500		3B	250574215	250578038	TaAffx.42053.1.S1_at	33.4406	5.06353	37.3645	5.2236	28.9873	4.85735	39.5271	5.30477	32.7126	5.03177	IPR002067, IPR018108, IPR023395	GO:0005347, GO:0015867, GO:0016020, GO:0016021, GO:0022857, GO:0042651, GO:0055085
TraesCS3B02G211600		3B	250802960	250812657												IPR039491
TraesCS3B02G211700		3B	250817962	250819389												IPR000504, IPR012677, IPR035979	GO:0003676, GO:0003723
TraesCS3B02G211800		3B	250960576	250979375	Ta.1943.1.S1_at; Ta.1943.1.S1_s_at	99.3888	6.63501	1206.37	10.2365	1531.28	10.5805	1113.81	10.1213	957.248	9.90275	IPR002848, IPR016068, IPR016069, IPR036081	GO:0004521, GO:0005634, GO:0005737, GO:0043565, GO:0090502
TraesCS3B02G211900		3B	251181448	251184142												IPR000061, IPR000626, IPR022030, IPR029071, IPR035967	GO:0003723, GO:0005515, GO:0006396
TraesCS3B02G212000		3B	251267989	251269895												IPR000061, IPR000626, IPR022030, IPR029071, IPR035967	GO:0003723, GO:0005515, GO:0006396
TraesCS3B02G212100		3B	251644315	251654258	Ta.23156.1.S1_at; TaAffx.28869.1.S1_at; TaAffx.36970.1.S1_at	42.8231	5.42032	117.665	6.87854	127.629	6.99581	142.218	7.15196	125.478	6.97129	IPR006607, IPR006630, IPR036388, IPR036390	GO:0003723,
TraesCS3B02G212200		3B	251782184	251782765												IPR001841, IPR013083
TraesCS3B02G212300		3B	252186473	252191708												IPR012337, IPR036397	GO:0003676, GO:0005634, GO:0005737, GO:0008408, GO:0090305
TraesCS3B02G212400		3B	252343587	252344397	Ta.28098.1.S1_x_at	168.324	7.39509	263.033	8.0391	105.746	6.72446	41.776	5.3846	22.2515	4.47583
TraesCS3B02G212500		3B	252344737	252347419	Ta.10299.2.S1_a_at	18.2613	4.19071	121.742	6.92769	102.96	6.68594	126.789	6.98629	138.611	7.1149	IPR003719	GO:0003824, GO:0005737, GO:0009058, GO:0016853
TraesCS3B02G212600		3B	252355532	252356437
TraesCS3B02G212700		3B	252356857	252359300												IPR001876, IPR022764, IPR035952	GO:0004175, GO:0004252, GO:0006508, GO:0016020, GO:0016021, GO:0046872
TraesCS3B02G212800		3B	252557541	252560070												IPR003719	GO:0003824, GO:0005737, GO:0009058, GO:0016853
TraesCS3B02G212900		3B	252588322	252597242	Ta.5620.1.S1_at; Ta.5620.1.S1_x_at; TaAffx.118934.1.S1_at; TaAffx.64682.1.S1_at	139.765	7.12686	264.719	8.04832	346.909	8.43841	416.873	8.70347	297.343	8.21598	IPR000778, IPR002048, IPR011992, IPR013112, IPR013121, IPR013130, IPR013623, IPR017927, IPR017938, IPR018247, IPR029654, IPR039261	GO:0004601, GO:0005509, GO:0016020, GO:0016021, GO:0016174, GO:0016491, GO:0050664, GO:0055114
TraesCS3B02G213000		3B	252666827	252670823	Ta.1581.1.A1_at; TaAffx.108876.1.S1_at	39.1328	5.29031	282.1	8.14006	301.915	8.238	200.089	7.6445	223.675	7.80526	IPR003719	GO:0003824, GO:0005737, GO:0009058, GO:0016853
TraesCS3B02G213100		3B	252795182	252796935												IPR003719	GO:0003824, GO:0009058
TraesCS3B02G213200	PRXIIF [Source:Projected from Arabidopsis thaliana (AT3G06050) UniProtKB/TrEMBL;Acc:A0A178VBA5]	3B	252803041	252808226	Ta.2167.1.S1_at; Ta.2167.3.S1_a_at	1025.68	10.0024	9519.28	13.2166	9781.63	13.2559	7620.61	12.8957	7921.66	12.9516	IPR013740, IPR036249, IPR037944, IPR013766	GO:0004601, GO:0005623, GO:0005737, GO:0005739, GO:0005759, GO:0006979, GO:0008379, GO:0016209, GO:0016491, GO:0034599, GO:0042744, GO:0045454, GO:0046686, GO:0055114, GO:0098869
TraesCS3B02G213300		3B	252853745	252853942	TaAffx.32510.1.S1_at	5.325	2.41278	54.6035	5.77092	49.6376	5.63336	35.8449	5.1637	32.1794	5.00807
TraesCS3B02G213400		3B	252856818	252869296	Ta.12511.1.S1_at	163.534	7.35344	1555.89	10.6035	1021.51	9.99648	1379.93	10.4304	1500.97	10.5517	IPR006603	GO:0016020, GO:0016021
TraesCS3B02G213500	26s proteasome non-ATPase regulatory subunit [Source:UniProtKB/TrEMBL;Acc:G0Z6F1]	3B	252929624	252933405	Ta.28693.1.S1_at	547.784	9.09746	3740.34	11.869	4120.73	12.0087	3792.89	11.8891	4212.85	12.0406	IPR000555, IPR024969, IPR035299, IPR037518	GO:0000502, GO:0004843, GO:0005515, GO:0008237, GO:0008541, GO:0016579, GO:0043161, GO:0061578, GO:0070122, GO:0070536, GO:0070628
TraesCS3B02G213600		3B	252956853	252959317												IPR001898	GO:0005215, GO:0006814, GO:0015081, GO:0016020, GO:0016021, GO:0022857, GO:0055085, GO:0098656
TraesCS3B02G213700		3B	253481531	253490371	Ta.1464.2.S1_a_at; TaAffx.95812.1.S1_s_at	13.9075	3.79779	3082.13	11.5897	3763.66	11.8779	3902.23	11.9301	6691.38	12.7081	IPR011701, IPR020846, IPR036259	GO:0016020, GO:0016021, GO:0022857, GO:0055085
TraesCS3B02G214800		3B	255705450	255706466												IPR006460	GO:0010274
TraesCS3B02G214900		3B	255983880	255991922	Ta.22112.1.S1_at	135.869	7.08608	760.672	9.57113	1005.16	9.97321	1032.33	10.0117	1326.26	10.3732	IPR009060, IPR015940, IPR022764	GO:0004252, GO:0005515, GO:0006508, GO:0016020, GO:0016021
TraesCS3B02G215000		3B	256188931	256197539
TraesCS3B02G215100	Hydroxymethylglutaryl-CoA lyase, mitochondrial [Source:Projected from Arabidopsis thaliana (AT2G26800) UniProtKB/Swiss-Prot;Acc:O81027]	3B	256199190	256205960												IPR000891, IPR013785, IPR030020, IPR043594	GO:0003824, GO:0004419, GO:0005739, GO:0016833, GO:0046951
TraesCS3B02G215200		3B	256245686	256248395												IPR000109, IPR036259	GO:0016020, GO:0016021, GO:0022857, GO:0055085
TraesCS3B02G215300	Rab proteins geranylgeranyltransferase component [Source:UniProtKB/TrEMBL;Acc:A0A077RZY9]	3B	256250032	256255109	Ta.6839.1.S1_at; TaAffx.9336.1.S1_s_at	48.8641	5.6107	249.274	7.96159	313.514	8.29239	308.717	8.27014	358.256	8.48485	IPR001738, IPR018203, IPR036188	GO:0005092, GO:0005096, GO:0005634, GO:0005737, GO:0005829, GO:0005968, GO:0006886, GO:0007264, GO:0016192, GO:0017137, GO:0018344, GO:0043547, GO:0050790, GO:2000541
TraesCS3B02G215400	Cysteine proteinase inhibitor [Source:UniProtKB/TrEMBL;Acc:W5CQ97]	3B	256357151	256360095	Ta.6229.1.S1_at	928.018	9.85801	6312.32	12.624	7927.11	12.9526	6838.61	12.7395	7111.38	12.7959	IPR000010, IPR018073, IPR027214	GO:0004857, GO:0004866, GO:0004869, GO:0006952, GO:0010466, GO:0010951, GO:0030414, GO:0061135
TraesCS3B02G215500	Peroxidase [Source:UniProtKB/TrEMBL;Acc:A0A341SEB3]	3B	256433409	256435504	Ta.18261.1.S1_a_at; Ta.18261.2.S1_x_at	303.219	8.24422	468.868	8.87304	877.904	9.77792	232.736	7.86255	341.289	8.41485	IPR000823, IPR002016, IPR010255, IPR019793, IPR033905	GO:0004601, GO:0006979, GO:0020037, GO:0042744, GO:0055114
TraesCS3B02G215600		3B	256728509	256730515	Ta.10415.1.A1_at	26.625	4.73471	8.77247	3.13298	8.48687	3.08523	5.7019	2.51144	9.3953	3.23194	IPR000403	GO:0030554, GO:0032550, GO:0032559,
TraesCS3B02G215700		3B	256779737	256783232	TaAffx.35707.1.S1_at	97.255	6.6037	924.083	9.85188	992.903	9.95551	1122.35	10.1323	1292.44	10.3359		GO:0005739, GO:0016020, GO:0016021,
TraesCS3B02G215800		3B	256783620	256787973	Ta.7751.1.S1_at; Ta.7751.1.S1_x_at	215.338	7.75046	646.738	9.33704	962.619	9.91082	911.626	9.8323	944.615	9.88358	IPR000924, IPR001412, IPR004046, IPR004526, IPR011035, IPR014729, IPR020056, IPR020058, IPR020059, IPR036282	GO:0000166, GO:0004812, GO:0004818, GO:0004819, GO:0005524, GO:0005737, GO:0005829, GO:0006412, GO:0006418, GO:0006424, GO:0006425, GO:0016874, GO:0030554, GO:0032550, GO:0032559, GO:0043039
TraesCS3B02G215900		3B	257037148	257039245	TaAffx.79512.1.S1_at	129.849	7.02069	976.06	9.93083	1222.83	10.256	1342.39	10.3906	1386.51	10.4372	IPR005607, IPR035925
TraesCS3B02G216000		3B	257102044	257103200	Ta.3436.1.S1_at	23.6462	4.56354	26.9338	4.75135	22.6576	4.50192	45.0748	5.49425	79.3161	6.30954	IPR000608, IPR016135, IPR023313	GO:0000166, GO:0005524, GO:0016740, GO:0030554, GO:0032550, GO:0032559,
TraesCS3B02G216100		3B	257210075	257213161	Ta.2526.1.S1_at	1166.1	10.1875	8290.32	13.0172	9236.54	13.1731	6740.03	12.7185	7344.77	12.8425	IPR007834	GO:0000502, GO:0000724, GO:0006406, GO:0008541, GO:0043248
TraesCS3B02G216200		3B	257240561	257243838	TaAffx.28768.1.S1_at	377.608	8.56075	3395.96	11.7296	3892.21	11.9264	4756.96	12.2158	5371.02	12.391
TraesCS3B02G216300		3B	257244184	257244964												IPR003245, IPR008972, IPR039391, IPR041846	GO:0009055, GO:0016020, GO:0016021, GO:0022900, GO:0046658
TraesCS3B02G216400		3B	257279751	257283484	TaAffx.88842.1.S1_at	28.7075	4.84336	80.3635	6.32847	55.3535	5.7906	72.608	6.18206	99.6292	6.6385
TraesCS3B02G216500		3B	257318538	257320738	Ta.24682.1.S1_at	92.9838	6.53891	962.438	9.91055	936.087	9.8705	1167.36	10.189	1165.21	10.1864	IPR019034
TraesCS3B02G216600	NEDD8-activating enzyme E1 catalytic subunit [Source:Projected from Arabidopsis thaliana (AT5G19180) UniProtKB/Swiss-Prot;Acc:O65041]	3B	257515140	257524875	Ta.9932.2.S1_a_at; Ta.9932.3.S1_a_at	163.472	7.3529	489.087	8.93395	715.795	9.4834	636.894	9.31491	772.156	9.59275	IPR000594, IPR014929, IPR023318, IPR030468, IPR033127, IPR035985	GO:0005524, GO:0008641, GO:0016881, GO:0019781, GO:0030554, GO:0032550, GO:0032559, GO:0045116
TraesCS3B02G216700		3B	257547800	257548135												IPR027409
TraesCS3B02G216800	ATP-dependent Clp protease proteolytic subunit [Source:UniProtKB/TrEMBL;Acc:A0A077RRI7]	3B	257776106	257782989	Ta.23768.1.A1_at	225.952	7.81988	2075.15	11.019	3867.2	11.9171	2761.82	11.4314	2620.3	11.3555	IPR001907, IPR023562, IPR029045	GO:0004176, GO:0004252, GO:0006508, GO:0006515, GO:0009368, GO:0051117
TraesCS3B02G216900		3B	257825234	257841393												IPR001623, IPR011990, IPR013026, IPR019734, IPR036869	GO:0005515
TraesCS3B02G217000	Expansin [Source:UniProtKB/TrEMBL;Acc:W5D3J6]	3B	257846738	257848247	Ta.30669.1.S1_at	24.47	4.61294	16.3919	4.03491	73.8614	6.20675	5.93246	2.56863	7.98657	2.99758	IPR002963, IPR007112, IPR007117, IPR007118, IPR009009, IPR036749, IPR036908	GO:0005576, GO:0005618, GO:0009664, GO:0016020, GO:0071555
TraesCS3B02G221500		3B	275912352	275916220	Ta.1996.1.S1_s_at	34.6313	5.114	125.671	6.9735	93.1896	6.5421	116.099	6.85921	91.8797	6.52167	IPR000719, IPR001245, IPR008271, IPR011009, IPR017441	GO:0000166, GO:0004672, GO:0004674, GO:0005524, GO:0006468, GO:0016301, GO:0016310, GO:0016740, GO:0030554, GO:0032550, GO:0032559
TraesCS3B02G221600	CAF2 [Source:Projected from Arabidopsis thaliana (AT1G23400) UniProtKB/TrEMBL;Acc:A0A178WC04]	3B	276479203	276493505												IPR001890, IPR035920	GO:0003723
TraesCS3B02G221700		3B	276848921	276852339	Ta.7164.1.S1_at	1305.82	10.3507	3951.54	11.9482	5375.74	12.3922	4926.74	12.2664	5342.42	12.3833	IPR005225, IPR006687, IPR006689, IPR027417	GO:0000166, GO:0003400, GO:0003924, GO:0005525, GO:0005783, GO:0005794, GO:0006886, GO:0006888, GO:0015031, GO:0016050, GO:0016192, GO:0030127, GO:0032550, GO:0061024, GO:0070863, GO:0070971
TraesCS3B02G221800		3B	277027468	277035233	Ta.14589.1.S1_at	660.962	9.36842	1449.38	10.5012	1818.8	10.8288	1959.89	10.9366	1949.09	10.9286	IPR002020, IPR005811, IPR016102, IPR016142, IPR016143, IPR017440, IPR017866, IPR033847, IPR036291, IPR036969	GO:001707, GO:0000166, GO:0001882, GO:0001883, GO:0003824, GO:0003878, GO:0005737, GO:0006629, GO:0016740, GO:0030554, GO:0032550, GO:0032553, GO:0032555, GO:0032559, GO:0046912, GO:0097367
TraesCS3B02G221900		3B	277099755	277100165												IPR002156, IPR036397	GO:0003676, GO:0004523
TraesCS3B02G256100		3B	413802368	413804502												IPR002885, IPR011990	GO:0005515, GO:0008270
TraesCS3B02G256200		3B	413862859	413866118												IPR001128, IPR002401, IPR017972, IPR036396	GO:0004497, GO:0005506, GO:0016021, GO:0016705, GO:0020037, GO:0055114
TraesCS3B02G256300		3B	413958242	413960680												IPR001128, IPR002401, IPR036396, IPR017972	GO:0004497, GO:0005506, GO:0016021, GO:0016491, GO:0016705, GO:0020037, GO:0046872, GO:0055114
TraesCS3B02G256400		3B	413969479	413971565												IPR001128, IPR002401, IPR017972, IPR036396	GO:0004497, GO:0005506, GO:0016705, GO:0020037, GO:0055114
TraesCS3B02G256500		3B	413990956	413994007	Ta.5724.1.S1_at	21.7862	4.44535	358.459	8.48566	604.742	9.24018	1942.33	10.9236	1424.13	10.4759	IPR001128, IPR002401, IPR017972, IPR036396	GO:0004497, GO:0005506, GO:0016021, GO:0016705, GO:0020037, GO:0055114
TraesCS3B02G256600		3B	414013702	414019215	TaAffx.25316.2.S1_at	45.785	5.5168	32.2461	5.01105	66.0708	6.04594	47.8263	5.57973	64.3374	6.00759	IPR004274, IPR011948, IPR023214, IPR036412	GO:0004721, GO:0006470, GO:0016311, GO:0016791
TraesCS3B02G256700		3B	414020367	414026235	Ta.13373.2.S1_a_at	141.463	7.14428	240.903	7.91231	191.014	7.57753	299.427	8.22606	197.714	7.62727	IPR000719, IPR003527, IPR011009, IPR017441	GO:0004672, GO:0004707, GO:0005524, GO:0006468, GO:0030554, GO:0032550, GO:0032559
TraesCS3B02G256800	AT5g40850/MHK7_8 [Source:Projected from Arabidopsis thaliana (AT5G40850) UniProtKB/TrEMBL;Acc:Q42606]	3B	414180718	414186474	Ta.16497.1.S1_at	44.4794	5.47506	329.146	8.36258	202.191	7.65957	253.24	7.98436	363.743	8.50677	IPR000878, IPR003043, IPR006366, IPR014776, IPR014777, IPR035996	GO:0004851, GO:0008168, GO:0009236, GO:0009416, GO:0009507, GO:0016740, GO:0019354, GO:0032259, GO:0043115, GO:0051266, GO:0051287, GO:0055114, GO:0090352, GO:1900058, GO:1902326
TraesCS3B02G256900		3B	414209496	414213548
TraesCS3B02G257000		3B	414485316	414494359	TaAffx.8943.1.S1_at	26.805	4.74443	293.361	8.19653	179.477	7.48766	207.707	7.6984	92.7396	6.53511	, IPR002123	GO:0016021, GO:0016746,
TraesCS3B02G257100		3B	414827556	414829543												IPR012946
TraesCS3B02G257200		3B	414979439	414985455	Ta.11367.1.A1_at; Ta.11367.2.S1_at	20.4372	4.35312	182.135	7.50886	161.659	7.33681	147.487	7.20444	256.202	8.00114	IPR000719, IPR008271, IPR011009, IPR017441	GO:0000166, GO:0004672, GO:0005524, GO:0006468, GO:0016020, GO:0016021, GO:0016301, GO:0016310, GO:0016740, GO:0030554, GO:0032550, GO:0032559
TraesCS3B02G257300		3B	414986839	414987600
TraesCS3B02G257400		3B	415045360	415046051													GO:0016020, GO:0016021
TraesCS3B02G257500		3B	415049901	415056497												IPR001461, IPR001969, IPR008138, IPR008139, IPR011001, IPR021109, IPR033121	GO:0004190, GO:0006508, GO:0006629, GO:0008233, GO:0016787
TraesCS3B02G297600	Glycosyltransferase [Source:UniProtKB/TrEMBL;Acc:W5D3U0]	3B	477327515	477329052												IPR002213, IPR035595	GO:0008194, GO:0016740, GO:0016757, GO:0016758
TraesCS3B02G297700		3B	477369194	477369964												IPR025322
TraesCS3B02G297800		3B	477625330	477626024												IPR025322
TraesCS3B02G297900		3B	477649530	477654148	Ta.10982.1.A1_x_at; Ta.10982.1.A1_a_at; Ta.10982.2.A1_x_at	85.0898	6.41091	339.073	8.40545	318.865	8.3168	324.051	8.34008	191.042	7.57775	IPR007145	GO:0000226, GO:0005737, GO:0005819, GO:0005874, GO:0008017
TraesCS3B02G298000	ATP synthase subunit beta [Source:UniProtKB/TrEMBL;Acc:A0A1D5VZ33]	3B	477883786	477888286	Ta.3152.1.S1_at; TaAffx.109140.1.S1_s_at	599.681	9.22805	3562.12	11.7985	3585.33	11.8079	3204.41	11.6458	3582.6	11.8068	IPR000194, IPR003593, IPR004100, IPR005722, IPR020003, IPR020971, IPR024034, IPR027417, IPR036121	GO:0000275, GO:0005524, GO:0006754, GO:0015986, GO:0016887, GO:0030554, GO:0032550, GO:0032559, GO:0045261, GO:0046034, GO:0046933, GO:1902600
TraesCS3B02G298100	DNA ligase [Source:UniProtKB/TrEMBL;Acc:A0A341SHN8]	3B	478077081	478093939												IPR000977, IPR012308, IPR012309, IPR012310, IPR012340, IPR016059, IPR036599	GO:0002237, GO:0003677, GO:0003909, GO:0003910, GO:0005524, GO:0006266, GO:0006281, GO:0006303, GO:0006310, GO:0006979, GO:0009409, GO:0009845, GO:0010225, GO:0015074, GO:0016874, GO:0030554, GO:0032550, GO:0032559, GO:0048316, GO:0051103, GO:0071897, GO:0097367, GO:1904975, GO:2000685
TraesCS3B02G298200		3B	478321958	478323639												IPR001005, IPR009057, IPR017930	GO:0003677
TraesCS3B02G298300		3B	478549671	478549956												IPR003340, IPR015300	GO:0003677
TraesCS3B02G298400		3B	478556935	478559737												IPR013126, IPR029047, IPR043129
TraesCS3B02G298500		3B	478578045	478583088	Ta.11896.1.A1_s_at; TaAffx.38048.1.A1_at	29.5044	4.88286	18.0228	4.17175	27.676	4.79056	821.216	9.68162	806.475	9.65549	IPR001574	GO:0017148, GO:0030598
TraesCS3B02G310000		3B	498726976	498730648	Ta.7017.1.S1_at; TaAffx.55754.1.S1_at	20.1137	4.33011	235.887	7.88195	101.257	6.66187	561.229	9.13244	733.588	9.51883	IPR000719, IPR001245, IPR001611, IPR003591, IPR008271, IPR011009, IPR013210, IPR017441, IPR032675	GO:0004672, GO:0005515, GO:0005524, GO:0006468
TraesCS3B02G310100		3B	498916330	498918215												IPR001611, IPR003591, IPR013210, IPR032675	GO:0005515, GO:0005886, GO:0009755, GO:0016020, GO:0016021, GO:0030554, GO:0032550, GO:0032559
TraesCS3B02G310200		3B	499056575	499059110												IPR032675
TraesCS3B02G310300		3B	499084876	499085904	Ta.22902.1.S1_at; Ta.22902.1.S1_x_at	541.579	9.08103	6829.16	12.7375	5441.83	12.4099	5033.11	12.2972	5575.57	12.4449	IPR006115, IPR008927, IPR013328, IPR015815, IPR029154, IPR036291	GO:0005829, GO:0016491, GO:0050661, GO:0051287, GO:0055114
TraesCS3B02G310400		3B	499164658	499168273												IPR001537, IPR004441, IPR013123, IPR029028, IPR029064	GO:0003723, GO:0006396, GO:0008168, GO:0008173
TraesCS3B02G310500	Auxin-responsive protein [Source:UniProtKB/TrEMBL;Acc:W5D6U4]	3B	499173177	499176380	Ta.10395.1.S1_a_at; Ta.10395.1.S1_x_at; Ta.10395.2.S1_x_at	10.2227	3.35371	2708.48	11.4033	2188.1	11.0955	6265.27	12.6132	9519.27	13.2166	IPR000270, IPR003311, IPR033389	GO:0005515, GO:0005634, GO:0006351, GO:0006355, GO:0009734
TraesCS3B02G310700		3B	499189136	499190527												IPR003340, IPR005508, IPR015300	GO:0003677, GO:0005634
TraesCS3B02G310800	LysM domain receptor-like kinase 3 [Source:Projected from Arabidopsis thaliana (AT1G51940) UniProtKB/Swiss-Prot;Acc:F4IB81]	3B	499351538	499356752												IPR000719, IPR001245, IPR008271, IPR011009, IPR017441, IPR018392, IPR036779	GO:0000166, GO:0004672, GO:0004674, GO:0005524, GO:0005886, GO:0006468, GO:0006952, GO:0009737, GO:0009738, GO:0009789, GO:0016020, GO:0016021, GO:0016301, GO:0016310, GO:0016740, GO:0030554, GO:0031348, GO:0032550, GO:0032559, GO:0045087, GO:0050832
TraesCS3B02G310900		3B	499450393	499454847	Ta.25927.1.A1_at; Ta.25927.1.A1_x_at	142.641	7.15624	443.27	8.79204	3617.82	11.8209	6181.38	12.5937	2533.63	11.307	IPR003137, IPR007365, IPR007484, IPR036757, IPR039373	GO:0016021,
TraesCS3B02G311000		3B	499628142	499632862	Ta.5139.1.S1_at; Ta.9132.3.S1_s_at	127.311	6.99221	187.32	7.54936	1455.14	10.5069	741.486	9.53428	403.211	8.65539	IPR003137, IPR007365, IPR007484, IPR036757, IPR039373	GO:0004180, GO:0006508, GO:0016020, GO:0016021,
TraesCS3B02G311100		3B	499639854	499643901												IPR010410	GO:0009505
TraesCS3B02G311200	Profilin [Source:UniProtKB/TrEMBL;Acc:A0A077RUP0]	3B	499805263	499806156	Ta.28801.1.A1_a_at; Ta.28801.3.S1_x_at	32.9797	5.04351	78.7672	6.29952	141.11	7.14068	176.474	7.46331	192.599	7.58945	IPR005455, IPR027310, IPR036140	GO:0003779, GO:0003785, GO:0005737, GO:0005856, GO:0005938, GO:0042989
TraesCS3B02G311400		3B	500307580	500308588	Ta.28398.1.S1_x_at; Ta.28398.3.S1_a_at	92.5044	6.53145	2424.96	11.2437	1274.14	10.3153	4552.41	12.1524	3795.13	11.8899
TraesCS3B02G312400		3B	501972082	501979666												IPR003653, IPR038765	GO:0006508, GO:0008234
TraesCS3B02G312500		3B	501985690	501987750	Ta.13886.1.S1_at	118.601	6.88998	716.987	9.4858	979.689	9.93618	953.808	9.89755	1118.73	10.1276	IPR043459	GO:0005739
TraesCS3B02G312600		3B	502635016	502638371	TaAffx.37741.1.S1_at	24.7237	4.62783	23.1394	4.53228	44.6433	5.48037	41.7161	5.38253	58.5748	5.87221	IPR002885, IPR011990, IPR032867	GO:0005515, GO:0008270
TraesCS3B02G312700	Prenyltransferase family protein [Source:Projected from Arabidopsis thaliana (AT5G40280) TAIR;Acc:AT5G40280]	3B	502638685	502643973	Ta.7380.1.A1_at	161.23	7.33298	1478.26	10.5297	1624.1	10.6654	1590.76	10.6355	1750.23	10.7733	IPR001330, IPR008930, IPR026872	GO:0003824, GO:0004659, GO:0004660, GO:0005965, GO:0008270, GO:0016740, GO:0018342, GO:0018343, GO:0046872
TraesCS3B02G312800		3B	502646200	502646991												IPR002562, IPR012337, IPR036397	GO:0003676, GO:0005634, GO:0005737, GO:0006139, GO:0008408, GO:0090305
TraesCS3B02G312900	Polynucleotide 3'-phosphatase ZDP [Source:Projected from Arabidopsis thaliana (AT3G14890) UniProtKB/Swiss-Prot;Acc:Q84JE8]	3B	502805848	502813114												IPR001510, IPR006549, IPR006551, IPR013954, IPR023214, IPR036412, IPR036957	GO:0003677, GO:0003690, GO:0005634, GO:0006281, GO:0008270, GO:0046403, GO:0046404, GO:0046872, GO:0046939, GO:0098506
TraesCS3B02G313000	Reticulon-like protein [Source:UniProtKB/TrEMBL;Acc:W5CYT3]	3B	502921535	502923630												IPR003388	GO:0005783, GO:0005789, GO:0016020, GO:0016021
TraesCS3B02G313100		3B	503030628	503031212												IPR001841, IPR013083	GO:0015081, GO:0016020, GO:0016021
TraesCS3B02G313200		3B	503033621	503034184												IPR001471, IPR016177, IPR036955	GO:0003677, GO:0003700, GO:0005634, GO:0006351, GO:0006355
TraesCS3B02G313300		3B	503576598	503577582												IPR004864	GO:0016020, GO:0016021
TraesCS3B02G368200		3B	580351029	580353106												IPR021825	GO:0016020, GO:0016021, GO:0031969
TraesCS3B02G368300		3B	580468739	580472902												IPR004827, IPR043452	GO:0003700, GO:0005634, GO:0006355, GO:0009738, GO:0045893
TraesCS3B02G368400		3B	580782603	580785431												IPR001471, IPR016177, IPR036955	GO:0003677, GO:0003700, GO:0005634, GO:0006351, GO:0006355
TraesCS3B02G368500		3B	580786226	580786968
TraesCS3B02G368600	ADP-ribosylation factor [Source:UniProtKB/TrEMBL;Acc:Q76ME3]	3B	581026448	581031825	Ta.2291.1.S1_x_at	2061.76	11.0097	8987	13.1336	9892.85	13.2722	8774.46	13.0991	8590.42	13.0685	IPR005225, IPR006689, IPR027417	GO:0000166, GO:0005525, GO:0005622, GO:0032550
TraesCS3B02G368700	Vacuolar protein sorting-associated protein 36 [Source:Projected from Arabidopsis thaliana (AT5G04920) UniProtKB/Swiss-Prot;Acc:Q9FF81]	3B	581078902	581082189												IPR021648, IPR036388, IPR036390, IPR037855, IPR040608	GO:0000814, GO:0005769, GO:0005770, GO:0005886, GO:0007033, GO:0009793, GO:0031902, GO:0032266, GO:0032509, GO:0043130, GO:0043328, GO:0071985, GO:0090351
TraesCS3B02G369300		3B	581335413	581341244
TraesCS3B02G369400		3B	581634172	581646022	Ta.12758.1.S1_s_at; Ta.12758.2.S1_x_at; TaAffx.113293.1.S1_at	62.0965	5.95644	379.699	8.56871	427.097	8.73842	457.428	8.8374	419.199	8.71149	IPR001164, IPR037278, IPR038508	GO:0005096, GO:0043547, GO:0046872
TraesCS3B02G369600		3B	581663324	581665291												IPR016140, IPR036312, IPR043325	GO:0016021
TraesCS3B02G369700		3B	581702630	581710160												IPR000300, IPR036691	GO:0016787, GO:0046856
TraesCS3B02G369800		3B	581906961	581908852												IPR004839, IPR005958, IPR015421, IPR015422, IPR015424	GO:0003824, GO:0006520, GO:0008483, GO:0009058, GO:0030170
TraesCS3B02G369900		3B	581957211	581963475												IPR002885, IPR011990, IPR032867	GO:0005515, GO:0008270
TraesCS3B02G370000		3B	581963737	581967107	Ta.8488.1.S1_a_at	307.212	8.26309	6013.24	12.5539	4684.6	12.1937	5174.14	12.3371	6786.98	12.7286
TraesCS3B02G370100	F-box protein SKIP24 [Source:Projected from Arabidopsis thaliana (AT1G08710) UniProtKB/Swiss-Prot;Acc:Q9CAZ0]	3B	581968180	581976202	TaAffx.111011.1.S1_at; TaAffx.111011.1.S1_s_at	9.07469	3.18185	69.8048	6.12525	41.1531	5.36293	45.4046	5.50477	30.2014	4.91654	IPR032675, IPR036047	GO:0005515
TraesCS3B02G370200	Cysteine synthase [Source:UniProtKB/TrEMBL;Acc:W5D5I3]	3B	581976401	581980326												IPR001216, IPR001926, IPR036052, IPR005856, IPR005859	GO:0004124, GO:0005737, GO:0006535, GO:0008652, GO:0009507, GO:0009643, GO:0010310, GO:0015979, GO:0016740, GO:0019344, GO:0030170, GO:0031977, GO:0090322
TraesCS3B02G376200		3B	592530095	592533992	Ta.11587.1.S1_at	28.3637	4.82598	9.26489	3.21177	77.1713	6.26999	36.068	5.17265	69.9522	6.1283	IPR000719, IPR001245, IPR001611, IPR003591, IPR011009, IPR013210, IPR017441, IPR032675	GO:0004672, GO:0005515, GO:0005524, GO:0006468, GO:0016021, GO:0030554, GO:0032550, GO:0032559
TraesCS3B02G376300	ATSIK [Source:Projected from Arabidopsis thaliana (AT3G08760) UniProtKB/TrEMBL;Acc:A0A384KX76]	3B	592608698	592613654												IPR000719, IPR001245, IPR011009	GO:0001883, GO:0004672, GO:0005524, GO:0006468, GO:0030554, GO:0032550, GO:0032553, GO:0032555, GO:0032559, GO:0097367
TraesCS3B02G376400		3B	592649621	592663905												IPR001680, IPR015943, IPR017986, IPR019775, IPR036322	GO:0005515
TraesCS3B02G376500		3B	592824443	592825069												IPR001841, IPR013083	GO:0016021
TraesCS3B02G376600		3B	592860115	592862598	Ta.28855.2.S1_at	1778.59	10.7965	4414.89	12.1082	5885.79	12.523	7084.02	12.7904	7243.81	12.8225	IPR000851, IPR005324, IPR005711, IPR013810, IPR014721, IPR018192, IPR020568	GO:0003723, GO:0003735, GO:0005840, GO:0006412, GO:0015935, GO:0022627, GO:1990904
TraesCS3B02G376700		3B	592867431	592867840												IPR000528, IPR016140, IPR036312	GO:0006869, GO:0008289
TraesCS3B02G376800	Expansin [Source:UniProtKB/TrEMBL;Acc:A0A077S188]	3B	593163474	593165215	Ta.5567.1.S1_at	241.029	7.91306	126.449	6.98241	17.6491	4.14153	70.2187	6.13378	6.3453	2.66569	IPR002963, IPR007112, IPR007117, IPR007118, IPR009009, IPR036749, IPR036908	GO:0005576, GO:0005618, GO:0009664, GO:0016020, GO:0071555
TraesCS3B02G376900	Expansin [Source:UniProtKB/TrEMBL;Acc:A0A077RHE0]	3B	593540967	593542658												IPR002963, IPR007112, IPR007117, IPR007118, IPR009009, IPR036749, IPR036908	GO:0005576, GO:0005618, GO:0009664, GO:0016020, GO:0071555
TraesCS3B02G377000	40S ribosomal protein S26 [Source:UniProtKB/TrEMBL;Acc:A0A077RF98]	3B	593553533	593557719												IPR000892, IPR038551	GO:0003729, GO:0003735, GO:0005840, GO:0006412, GO:0022627
TraesCS3B02G377100		3B	593560982	593563559
TraesCS3B02G458900	Leucine-rich repeat receptor-like kinase, Specification of anther cell identity, Control of early sporogenic development, Initiation of anther wall formatio [Source: Projected from Oryza sativa (Os01g0917500)]	3B	702679690	702686741												IPR000719, IPR001245, IPR001611, IPR003591, IPR008271, IPR011009, IPR013210, IPR017441, IPR032675	GO:0000166, GO:0004672, GO:0004674, GO:0005515, GO:0005524, GO:0006468, GO:0016020, GO:0016021, GO:0016301, GO:0016310, GO:0016740, GO:0030554, GO:0032550, GO:0032559, GO:0097367
TraesCS3B02G459000		3B	702690096	702692579												IPR002885, IPR011990, IPR032867	GO:0005515, GO:0008270
TraesCS3B02G459100		3B	702698478	702701074												IPR001611, IPR032675	GO:0005515, GO:0030554, GO:0032550, GO:0032559
TraesCS3B02G459200		3B	702826991	702836075												IPR000719, IPR001245, IPR001611, IPR008271, IPR011009, IPR017441, IPR021720, IPR032675	GO:0000166, GO:0004672, GO:0004674, GO:0005515, GO:0005524, GO:0006468, GO:0016301, GO:0016310, GO:0016740, GO:0030554, GO:0032550, GO:0032559
TraesCS3B02G459300		3B	702845382	702858494												IPR001611, IPR021720, IPR032675	GO:0005515, GO:0016020, GO:0016021, GO:0030554, GO:0032550, GO:0032559, GO:0097367
TraesCS3B02G459400		3B	703007090	703007395												IPR001133, IPR039428	GO:0008137, GO:0009507, GO:0009536, GO:0016020, GO:0016021, GO:0016651, GO:0030964, GO:0042773, GO:0055114
TraesCS3B02G459500		3B	703007456	703007668												IPR001694	GO:0005886, GO:0016020, GO:0016021, GO:0016491, GO:0055114
TraesCS3B02G459600		3B	703116042	703117459	Ta.8487.1.A1_at	26.935	4.75141	106.106	6.72936	115.446	6.85107	133.191	7.05735	60.4067	5.91664	IPR000095, IPR036936
TraesCS3B02G459700		3B	703296035	703297327												IPR001841, IPR013083
TraesCS3B02G459800		3B	703302235	703305821												IPR039933	GO:0007140, GO:0007143
TraesCS3B02G459900	Small ubiquitin-related modifier [Source:UniProtKB/TrEMBL;Acc:W5D2R4]	3B	703330509	703333503	Ta.2594.1.S1_s_at; Ta.2594.1.S1_x_at	1275.95	10.3174	16068.7	13.972	14985.7	13.8713	13015.3	13.6679	11263	13.4593	IPR000626, IPR022617, IPR029071	GO:0005515, GO:0005634, GO:0016925, GO:0031386, GO:0044389
TraesCS3B02G460000	Small ubiquitin-related modifier [Source:UniProtKB/TrEMBL;Acc:W5D591]	3B	703593861	703595347	Ta.2668.1.S1_at	2832.34	11.4678	41051.6	15.3252	39585	15.2727	21704.4	14.4057	18243.6	14.1551	IPR000626, IPR022617, IPR029071	GO:0005515, GO:0005634, GO:0016925, GO:0031386, GO:0044389
TraesCS3B02G460100		3B	703847801	703848513												IPR000719, IPR011009	GO:0004672, GO:0005524, GO:0006468, GO:0030554, GO:0032550, GO:0032559, GO:0097367
TraesCS3B02G460200		3B	703854485	703855507												IPR012871
TraesCS3B02G460300		3B	704024855	704026121
TraesCS3B02G460400		3B	704027184	704030866												IPR001906, IPR005630, IPR008930, IPR008949, IPR034741, IPR036965	GO:0000287, GO:0010333, GO:0016114, GO:0016829, GO:0046872
TraesCS3B02G460500		3B	704040294	704043176												IPR001128, IPR002401, IPR017972, IPR036396	GO:0005506, GO:0016705, GO:0020037, GO:0055114
TraesCS3B02G460600		3B	704108905	704110517
TraesCS3B02G460700		3B	704121890	704125384												IPR001906, IPR005630, IPR008930, IPR008949, IPR034741, IPR036965	GO:0000287, GO:0010333, GO:0016114, GO:0016829, GO:0046872
TraesCS3B02G460800		3B	704134817	704136762												IPR001128, IPR002401, IPR017972, IPR036396	GO:0004497, GO:0005506, GO:0016705, GO:0020037, GO:0055114
TraesCS3B02G460900		3B	704260916	704262754												IPR001128, IPR002401, IPR017972, IPR036396	GO:0004497, GO:0005506, GO:0016020, GO:0016021, GO:0016491, GO:0016705, GO:0020037, GO:0046872, GO:0055114
TraesCS3B02G461000		3B	704322647	704323209
TraesCS3B02G461100		3B	704323786	704325445
TraesCS3B02G461200		3B	704326187	704329361
TraesCS3B02G472800		3B	721493462	721494894	Ta.18762.1.S1_s_at; TaAffx.110740.1.S1_at	223.188	7.80211	1431.2	10.483	1500.2	10.5509	2123.68	11.0524	1878.72	10.8755	IPR003441, IPR036093	GO:0003677, GO:0005634, GO:0006355
TraesCS3B02G472900		3B	722335141	722335689
TraesCS3B02G473000		3B	722351335	722353592	Ta.30800.1.S1_a_at	298.779	8.22293	1727.88	10.7548	1833.88	10.8407	1873.08	10.8712	2543.23	11.3124	IPR009305	GO:0016020, GO:0016021, GO:0046521
TraesCS3B02G473100		3B	722359092	722363620	Ta.23063.1.S1_s_at	53.6719	5.74609	392.306	8.61584	281.455	8.13676	323.952	8.33964	382.906	8.58085	IPR000719, IPR008271, IPR011009, IPR017441	GO:0004672, GO:0005524, GO:0006468, GO:0030554, GO:0032550, GO:0032559
TraesCS3B02G473200		3B	722365161	722366828												IPR002775, IPR014560, IPR036882	GO:0003676, GO:0003723, GO:0005634, GO:0048235
TraesCS3B02G473300	Ubiquitin-conjugating enzyme 27 [Source:Projected from Arabidopsis thaliana (AT5G50870) UniProtKB/TrEMBL;Acc:F4KAG5]	3B	722475647	722480010	Ta.6161.2.S1_a_at; Ta.6161.3.S1_a_at	368.572	8.5258	3523.29	11.7827	3001.65	11.5515	3033.76	11.5669	2854.55	11.479	IPR000608, IPR009060, IPR015940, IPR016135, IPR023313, IPR041974	GO:0000166, GO:0000209, GO:0004842, GO:0005515, GO:0005524, GO:0005634, GO:0005829, GO:0006511, GO:0016740, GO:0030554, GO:0032550, GO:0032559, GO:0043161, GO:0061631
TraesCS3B02G473600		3B	722587523	722591382	TaAffx.64865.1.A1_at	11.6312	3.53993	131.724	7.04137	110.996	6.79436	92.8215	6.53639	72.8837	6.18752	IPR001005, IPR009057, IPR017930	GO:0003677, GO:0016020, GO:0016021
TraesCS3B02G473700		3B	723028055	723031193												IPR001841, IPR013083	GO:0004842, GO:0016567
TraesCS3B02G473900		3B	723101961	723102509
TraesCS3B02G474000		3B	723150025	723154204	Ta.25250.1.A1_at	106.489	6.73456	309.876	8.27555	227.482	7.82961	226.64	7.82426	164.281	7.36002	IPR004263, IPR040911	GO:0005794, GO:0006486, GO:0009834, GO:0010417, GO:0016020, GO:0016021, GO:0016757
TraesCS3B02G474100		3B	723275343	723277695	TaAffx.38158.1.S1_at; TaAffx.38158.4.S1_s_at	355.05	8.47188	922.931	9.85008	1215.07	10.2468	1618.19	10.6602	1425.09	10.4768	IPR001841, IPR013083, IPR039525	GO:0016567, GO:0046872, GO:0061630
TraesCS3B02G528200		3B	770346728	770348332												IPR013181
TraesCS3B02G528600		3B	770657466	770658813												IPR001810, IPR036047	GO:0005515
TraesCS3B02G528700		3B	770659251	770660615												IPR004843, IPR011230	GO:0016787
TraesCS3B02G528800		3B	770666396	770666779												IPR008889
TraesCS3B02G528900		3B	770689464	770689928	TaAffx.117305.2.S1_at; TaAffx.117305.2.S1_s_at	20.2584	4.34045	80.9467	6.3389	53.4312	5.73961	33.4002	5.06178	24.5158	4.61564	IPR007493, IPR036758
TraesCS3B02G529000		3B	770727027	770728382												IPR005174
TraesCS3B02G529200		3B	770964140	770964677												IPR007493, IPR036758
TraesCS3B02G529900		3B	771242041	771242562	Ta.10885.1.S1_at	10.2319	3.355	7.58732	2.92359	3.18656	1.672	3.51285	1.81264	4.06591	2.02358	IPR007493, IPR036758
TraesCS3B02G530100		3B	771323933	771328353												IPR003340, IPR015300	GO:0003677, GO:0005634, GO:0006351, GO:0006355
TraesCS3B02G530200		3B	771386899	771395688												IPR003340, IPR015300	GO:0003677
TraesCS3B02G530300		3B	771399904	771410318												IPR003340, IPR015300	GO:0003677
TraesCS3B02G530400		3B	771412665	771412952												IPR003340, IPR015300	GO:0003677
TraesCS3B02G530700		3B	771622198	771622701
TraesCS3B02G530800		3B	771664287	771666105												IPR036047	GO:0005515
TraesCS3B02G530900	DNA repair protein recA homolog 2, mitochondrial [Source:Projected from Arabidopsis thaliana (AT3G10140) UniProtKB/Swiss-Prot;Acc:Q8RY99]	3B	771794966	771799358												IPR003593, IPR013765, IPR020587, IPR020588, IPR023400, IPR027417	GO:0000002, GO:0003677, GO:0003697, GO:0005524, GO:0006259, GO:0006281, GO:0006310, GO:0008094, GO:0009408, GO:0030554, GO:0032550, GO:0032559
TraesCS3B02G531000		3B	771840218	771844971												IPR003653, IPR038765	GO:0006508, GO:0008234
TraesCS3D02G511100		3D	595940553	595942439												IPR000719, IPR001245, IPR011009, IPR017441, IPR024788	GO:0004672, GO:0005524, GO:0006468, GO:0016021, GO:0030554, GO:0032550, GO:0032559
TraesCS3D02G511200		3D	596021215	596022298												IPR000626, IPR019956, IPR029071	GO:0005515
TraesCS3D02G511300		3D	596056968	596061325	TaAffx.106722.1.S1_x_at	13.2206	3.72472	8.82915	3.14227	18.2639	4.19092	3.78712	1.9211	4.65494	2.21876	IPR001841, IPR010652, IPR013083, IPR017907, IPR018957	GO:0016021, GO:0046872, GO:0061630
TraesCS3D02G511400		3D	596072981	596074440												IPR000215, IPR023796, IPR036186, IPR042178, IPR042185	GO:0005615
TraesCS3D02G511500		3D	596096305	596113079												IPR000626, IPR019954, IPR019956, IPR029071	GO:0005515
TraesCS3D02G511600		3D	596161236	596162048	Ta.10028.1.S1_s_at; Ta.27892.1.S1_at	12.0475	3.59066	42.2863	5.40212	12.9384	3.69358	30.4782	4.92971	30.26	4.91934	IPR002160, IPR011065	GO:0004857, GO:0004866, GO:0061135
TraesCS3D02G511614		3D	596177559	596178263	Ta.9938.1.S1_at	17.5081	4.12995	124.289	6.95755	52.1444	5.70444	48.3731	5.59613	63.0589	5.97863	IPR002160, IPR011065	GO:0004866, GO:0010951
TraesCS3D02G511617		3D	596193110	596193814	Ta.9938.1.S1_at	17.5081	4.12995	124.289	6.95755	52.1444	5.70444	48.3731	5.59613	63.0589	5.97863	IPR002160, IPR011065	GO:0004866, GO:0010951
TraesCS3D02G511700		3D	596635640	596636518												IPR001810, IPR036047	GO:0005515
TraesCS3D02G511800		3D	596690019	596693567												IPR002182, IPR027417, IPR032675, IPR038005, IPR041118	GO:0030554, GO:0032550, GO:0032559, GO:0043531
TraesCS3D02G511900		3D	596717817	596721641	Ta.30704.1.S1_at; Ta.30704.2.S1_at; Ta.30704.2.S1_x_at	22.3077	4.47947	41.4866	5.37457	60.3802	5.916	48.2895	5.59364	35.1694	5.13625	IPR000626, IPR019956, IPR029071	GO:0005515
TraesCS3D02G512000		3D	596780248	596781808												IPR004158
TraesCS3D02G512100		3D	596846242	596851438												IPR000719, IPR001245, IPR008271, IPR011009, IPR017441, IPR024788	GO:0004672, GO:0005524, GO:0006468
TraesCS3D02G512200		3D	596885466	596886587												IPR004045, IPR004046, IPR010987, IPR036249, IPR036282, IPR040079	GO:0005515
TraesCS3D02G512400		3D	596912028	596915547	Ta.1187.1.S1_x_at	218.499	7.77148	787.861	9.6218	862.128	9.75176	984.188	9.94279	1098.09	10.1008	IPR009294	GO:0016021, GO:0016485, GO:0043085
TraesCS3D02G512600		3D	597069527	597071687												IPR003314, IPR005174	GO:0003677
TraesCS3D02G512700	E3 ubiquitin-protein ligase [Source:UniProtKB/TrEMBL;Acc:A0A1D5WHG4]	3D	597095910	597097486	Ta.16434.2.S1_at	4.9625	2.31107	25.8626	4.69279	68.2111	6.09193	57.9121	5.85579	42.9738	5.42538	IPR008974, IPR013010, IPR013083, IPR018121	GO:0005515, GO:0005634, GO:0006511, GO:0007275, GO:0008270, GO:0016567, GO:0042025
TraesCS3D02G512800		3D	597207677	597208198												IPR019557
TraesCS3D02G513000		3D	597295790	597298101												IPR002182, IPR027417, IPR032675	GO:0003700, GO:0004674, GO:0005515, GO:0005524, GO:0005634, GO:0006355, GO:0006468, GO:0006952, GO:0007165, GO:0030554, GO:0032550, GO:0032559, GO:0043531, GO:0043565, GO:0097367
TraesCS3D02G513100		3D	597398066	597399127												IPR000210, IPR002083, IPR008974, IPR011333, IPR034090	GO:0005515
TraesCS3D02G513200		3D	597406924	597410376												IPR002182, IPR027417, IPR038005, IPR041118	GO:0030554, GO:0032550, GO:0032559, GO:0043531
TraesCS3D02G513300		3D	597421302	597421553
TraesCS3D02G513400		3D	597477005	597483170	Ta.27737.1.S1_at; TaAffx.53555.1.S1_at	16.7947	4.06993	162.709	7.34615	146.163	7.19143	176.958	7.46727	174.675	7.44853	IPR002182, IPR027417, IPR032675	GO:0001883, GO:0003700, GO:0004674, GO:0005515, GO:0005524, GO:0005634, GO:0006355, GO:0006468, GO:0006952, GO:0007165, GO:0030554, GO:0032550, GO:0032559, GO:0043531, GO:0043565, GO:0097367
TraesCS3D02G513500		3D	597485531	597490492	TaAffx.23892.1.S1_at	32.7775	5.03463	69.1234	6.1111	111.315	6.79851	148.017	7.20962	108.786	6.76535	IPR002182, IPR027417, IPR032675, IPR038005, IPR041118	GO:0003700, GO:0004674, GO:0005515, GO:0005524, GO:0005634, GO:0006355, GO:0006468, GO:0006952, GO:0007165, GO:0030554, GO:0032550, GO:0032559, GO:0043531, GO:0043565
TraesCS3D02G513600		3D	597546896	597548475	TaAffx.113821.1.S1_at	41.0463	5.35918	60.0996	5.90928	657.637	9.36115	1043.37	10.027	30.1479	4.91398
TraesCS3D02G513700		3D	597616763	597620277												IPR000270, IPR000644	GO:0005515, GO:0030554
TraesCS3D02G513800		3D	597672133	597673199												IPR002100, IPR036879	GO:0003677, GO:0005634, GO:0006351, GO:0006355, GO:0046983
TraesCS3D02G532800		3D	608667799	608670344												IPR003657, IPR036576	GO:0003700, GO:0005634, GO:0006355, GO:0043565
TraesCS3D02G532900		3D	608748605	608749473												IPR002100, IPR036879	GO:0003677, GO:0005634, GO:0006351, GO:0006355, GO:0046983
TraesCS3D02G533000	Protein FIZZY-RELATED 3 [Source:Projected from Arabidopsis thaliana (AT5G13840) UniProtKB/Swiss-Prot;Acc:Q8LPL5]	3D	608774841	608778486	Ta.27562.1.S1_at	10.6675	3.41515	41.7657	5.38425	13.1996	3.72242	40.8222	5.35128	29.7185	4.89329	IPR001680, IPR015943, IPR017986, IPR019775, IPR033010, IPR036322	GO:0005515, GO:0010997, GO:0097027, GO:1904668
TraesCS3D02G533100		3D	608924067	608931731	TaAffx.120720.1.S1_at; TaAffx.38681.1.A1_at	26.7613	4.74207	45.9089	5.5207	47.4442	5.56816	26.3204	4.71811	22.1229	4.46747	IPR000152, IPR000719, IPR000742, IPR001245, IPR001881, IPR008271, IPR011009, IPR017441, IPR018097, IPR025287	GO:0004672, GO:0005509, GO:0005524, GO:0006468, GO:0016021, GO:0030247, GO:0030554, GO:0032550, GO:0032559
TraesCS3D02G533200		3D	608950841	608953333	TaAffx.93492.1.S1_at	9.69438	3.27715	66.6042	6.05754	47.7748	5.57818	7.278	2.86354	7.78192	2.96013	IPR001128, IPR002401, IPR017972, IPR036396	GO:0004497, GO:0005506, GO:0016705, GO:0020037, GO:0055114
TraesCS3D02G533300		3D	608981203	609006658												IPR001128, IPR002401, IPR017972, IPR036396	GO:0005506, GO:0016705, GO:0020037, GO:0055114
TraesCS3D02G533400		3D	609024334	609025064
TraesCS3D02G533500		3D	609072327	609076435												IPR002110, IPR020683, IPR026961, IPR036770	GO:0005515
TraesCS3D02G533600	Pentatricopeptide repeat-containing protein At4g39530 [Source:Projected from Arabidopsis thaliana (AT4G39530) UniProtKB/Swiss-Prot;Acc:Q9SVA5]	3D	609079926	609084694												IPR002885, IPR011990	GO:0005515
TraesCS3D02G533700		3D	609085067	609089845	Ta.25309.1.A1_at; TaAffx.107326.1.S1_at; TaAffx.25998.1.S1_s_at	132.069	7.04515	462.567	8.85352	317.899	8.31243	242.049	7.91916	254.196	7.9898	IPR001005, IPR009057, IPR017930, IPR029071	GO:0003677
TraesCS3D02G533800		3D	609104271	609107164												IPR010742, IPR029008	GO:0016021
TraesCS3D02G533900		3D	609119880	609120976
TraesCS3D02G534000		3D	609123182	609125575												IPR006439, IPR010237, IPR036412, IPR041492	GO:0016787
TraesCS3D02G534100		3D	609166173	609171927												IPR001096, IPR043577	GO:0006508, GO:0008233
TraesCS3D02G534200		3D	609212443	609217259												IPR001096, IPR043577	GO:0006508, GO:0008233
TraesCS3D02G534300		3D	609232037	609237109	TaAffx.90226.1.S1_at	74.4969	6.21911	176.035	7.45972	105.932	6.72699	75.8779	6.24561	85.0038	6.40946	IPR032675, IPR036047	GO:0005515
TraesCS3D02G534400	Probable pectinesterase 67 [Source:Projected from Arabidopsis thaliana (AT3G17060) UniProtKB/Swiss-Prot;Acc:Q9LSP1]	3D	609239693	609241359												IPR000070, IPR011050, IPR012334	GO:0030599, GO:0042545
TraesCS3D02G534500		3D	609285404	609287257												IPR001128, IPR002401, IPR017972, IPR036396	GO:0004497, GO:0005506, GO:0016021, GO:0016705, GO:0020037, GO:0055114
TraesCS3D02G534600		3D	609289222	609292485												IPR002110, IPR020683, IPR026961, IPR036770	GO:0005515, GO:0016021
TraesCS3D02G534700		3D	609328407	609330047												IPR010666	GO:0008270
TraesCS3D02G534800	Glycosyltransferase [Source:UniProtKB/TrEMBL;Acc:A0A1D5WGL0]	3D	609363822	609365267												IPR002213, IPR035595	GO:0016758
TraesCS3D02G534900		3D	609371594	609374829												IPR000719, IPR001611, IPR003591, IPR008271, IPR011009, IPR032675	GO:001707, GO:0001882, GO:0001883, GO:0004672, GO:0005515, GO:0005524, GO:0006468, GO:0016021, GO:0030554, GO:0032550, GO:0032553, GO:0032555, GO:0032559, GO:0097367
TraesCS3D02G535000		3D	609498116	609500120												IPR000073, IPR029058
TraesCS3D02G535100		3D	609585080	609590719												IPR002110, IPR020683, IPR026961, IPR036770	GO:0005515
TraesCS3D02G535200		3D	609606901	609610251												IPR013255
TraesCS3D02G535300		3D	609615683	609618222												IPR032675, IPR038005, IPR041118	GO:001707, GO:0001882, GO:0001883, GO:0005524, GO:0006364, GO:0006915, GO:0006952, GO:0030554, GO:0032550, GO:0032553, GO:0032555, GO:0032559, GO:0043531, GO:0097367,
TraesCS3D02G535400	AP-3 complex subunit beta [Source:UniProtKB/TrEMBL;Acc:A0A1D5WCY9]	3D	609619263	609627060												IPR002553, IPR011989, IPR016024, IPR026739, IPR026740, IPR029390	GO:0006886, GO:0006896, GO:0016192, GO:0030117, GO:0030123, GO:0051453, GO:0080171
TraesCS3D02G535500		3D	609627221	609628618												IPR003441, IPR036093	GO:0003677, GO:0006355
TraesCS3D02G535600		3D	609704317	609707202	Ta.12004.1.A1_at	319.632	8.32027	390.049	8.60751	1013.6	9.98528	636.649	9.31435	457.076	8.83629	IPR004383, IPR006638, IPR007197, IPR013785, IPR027492, IPR040072	GO:0003824, GO:0006364, GO:0008173, GO:0030488, GO:0051536, GO:0070475
TraesCS3D02G535700		3D	609738165	609742070												IPR000719, IPR008271, IPR011009, IPR017441	GO:0004672, GO:0004674, GO:0005524, GO:0006468, GO:0030554, GO:0032550, GO:0032559, GO:0097367
TraesCS3D02G535900		3D	609928529	609930742	Ta.24729.1.S1_x_at	267.428	8.06301	608.807	9.24984	886.599	9.79214	822.223	9.68339	696.835	9.44467	IPR000289, IPR012340, IPR028626	GO:0000028, GO:0003735, GO:0005840, GO:0006412, GO:0022627, GO:0030490
TraesCS3D02G536000		3D	609931866	609943127												IPR012416	GO:0003735, GO:0005516, GO:0005840, GO:0006412
TraesCS3D02G536100		3D	610061063	610062335
TraesCS3D02G536200		3D	610072809	610075421	TaAffx.83245.1.S1_at	115.336	6.8497	222.855	7.79996	125.394	6.97032	86.8404	6.44029	78.9363	6.30262	IPR006502
TraesCS3D02G536300		3D	610138928	610139688	Ta.27457.3.S1_x_at	11219.1	13.4537	120786	16.8821	98606.1	16.5894	29414.8	14.8443	25136.9	14.6175	IPR000347	GO:0046872
TraesCS3D02G536400		3D	610157754	610161298												IPR008570, IPR014041, IPR036390	GO:0000814, GO:0071985
TraesCS3D02G536500		3D	610166124	610168198	Ta.22363.1.S1_at	7.47063	2.90123	75.5779	6.23989	20.9303	4.38752	48.3268	5.59475	25.0284	4.6455	IPR006044, IPR006045, IPR011051, IPR014710	GO:0045735
TraesCS3D02G536600		3D	610186917	610187265	Ta.27457.6.S1_x_at	5079.2	12.3104	74525.2	16.1854	31591.1	14.9472	28422.4	14.7947	29194.8	14.8334	IPR000347	GO:0046872
TraesCS3D02G536700		3D	610190340	610190684												IPR000347	GO:0046872
TraesCS3D02G536800		3D	610194003	610194337
TraesCS3D02G536900		3D	610199565	610201683	Ta.5347.1.A1_at	11.0844	3.47046	98.5274	6.62245	79.6275	6.31519	253.743	7.98722	199.446	7.63985	IPR000266, IPR012340, IPR019984	GO:0003735, GO:0005840, GO:0006412
TraesCS3D02G537000	40S ribosomal protein S19, mitochondrial [Source:Projected from Arabidopsis thaliana (AT5G47320) UniProtKB/Swiss-Prot;Acc:P39697]	3D	610207141	610207810												IPR002222, IPR005732, IPR020934, IPR023575	GO:0003723, GO:0003735, GO:0005840, GO:0006412, GO:0015935
TraesCS3D02G537100		3D	610345970	610357986	Ta.4664.1.S1_at	71.5694	6.16127	726.833	9.50548	774.356	9.59685	941.541	9.87888	751.743	9.5541		GO:0001883, GO:0030554, GO:0032550, GO:0032553, GO:0032555, GO:0032559, GO:0097367,
TraesCS3D02G537200		3D	610359653	610359820
TraesCS3D02G537300	Very-long-chain (3R)-3-hydroxyacyl-CoA dehydratase [Source:UniProtKB/TrEMBL;Acc:A0A1D5WE30]	3D	610428994	610431440												IPR007482	GO:0005789, GO:0006633, GO:0016021, GO:0102158, GO:0102343, GO:0102344, GO:0102345,
TraesCS3D02G537400		3D	610543334	610545124												IPR003851	GO:0003677, GO:0005634, GO:0006355
TraesCS4A02G344400		4A	624291683	624293216
TraesCS4A02G344500		4A	624298227	624299705
TraesCS4A02G344600		4A	624350511	624351782												IPR001611, IPR003591, IPR011049, IPR013210, IPR032675	GO:0005515
TraesCS4A02G344700		4A	624369604	624371215												IPR001611, IPR003591, IPR011049, IPR013210, IPR032675	GO:0005515
TraesCS4A02G344800		4A	624596862	624597409												IPR011049
TraesCS4A02G344900		4A	624614706	624618058	Ta.2358.1.S1_x_at	573.454	9.16353	2425.92	11.2443	2532.26	11.3062	2095.29	11.0329	2185.62	11.0938	IPR000163, IPR001107, IPR036013	GO:0016020
TraesCS4A02G345000	Expansin [Source:UniProtKB/TrEMBL;Acc:A0A341NSZ1]	4A	624733147	624734420												IPR002963, IPR007112, IPR007117, IPR007118, IPR009009, IPR036749, IPR036908	GO:0005576, GO:0005618, GO:0009664, GO:0016020, GO:0016787, GO:0071555
TraesCS4A02G345100		4A	624746855	624747938												IPR007112, IPR007117, IPR007118, IPR009009, IPR036749, IPR036908	GO:0005576
TraesCS4A02G345200		4A	624833011	624834614
TraesCS4A02G345300	Patatin [Source:UniProtKB/TrEMBL;Acc:A0A341TVI0]	4A	624919849	624921646												IPR002641, IPR016035	GO:0006629
TraesCS4A02G345400	Patatin [Source:UniProtKB/TrEMBL;Acc:W5DML4]	4A	624925381	624926570												IPR002641, IPR016035	GO:0006629, GO:0016042, GO:0016787
TraesCS4A02G345500		4A	624933745	624937337												IPR000719, IPR008271, IPR011009, IPR017441, IPR039192	GO:0001883, GO:0004672, GO:0005524, GO:0006468, GO:0030554, GO:0032550, GO:0032559, GO:0097367
TraesCS4A02G345600		4A	624982868	624983686												IPR005174
TraesCS4A02G345700		4A	624991445	624992966												IPR001611, IPR003591, IPR011049, IPR032675	GO:0005515
TraesCS4A02G345800		4A	625029910	625030335	TaAffx.23723.1.S1_at	106.043	6.7285	533.789	9.06013	386.713	8.59512	286.206	8.16091	241.067	7.91329
TraesCS4A02G345900		4A	625076017	625077814	Ta.7108.1.S1_at	44.7188	5.48281	40.9055	5.35422	47.2452	5.56209	35.9837	5.16927	35.5931	5.15353	IPR001611, IPR003591, IPR011049, IPR013210, IPR032675	GO:0005515
TraesCS4A02G346000		4A	625128444	625129887
TraesCS4A02G346100		4A	625164711	625166308												IPR011049, IPR013210, IPR032675
TraesCS4A02G346200		4A	625175595	625178521
TraesCS4A02G346300		4A	625228338	625232830												IPR000163	GO:0016020
TraesCS4A02G346500		4A	625247045	625249102
TraesCS4A02G346600		4A	625249115	625249540												IPR005174
TraesCS4A02G346700		4A	625250446	625253506	Ta.337.1.S1_at	31.2194	4.96437	50.8845	5.66915	77.5149	6.2764	71.4913	6.1597	96.7508	6.5962	IPR032675, IPR036047	GO:0005515
TraesCS4A02G346900		4A	625264110	625265243												IPR001611, IPR011049, IPR013210, IPR032675	GO:0005515
TraesCS4A02G347000		4A	625281273	625282133												IPR001611, IPR011049, IPR013210, IPR032675	GO:0005515
TraesCS4A02G347100		4A	625321427	625322251												IPR001611, IPR011049, IPR013210, IPR032675	GO:0005515
TraesCS4A02G347200		4A	625367240	625368106												IPR001611, IPR011049, IPR032675	GO:0005515
TraesCS4A02G347300		4A	625372058	625372726												IPR001611, IPR032675	GO:0005515
TraesCS4A02G347400		4A	625394394	625397019												IPR001810, IPR032675, IPR036047	GO:0005515
TraesCS4A02G347500		4A	625405581	625416712												IPR000719, IPR001245, IPR011009	GO:0004672, GO:0005524, GO:0006468, GO:0030554, GO:0032550, GO:0032559, GO:0097367
TraesCS4A02G347600		4A	625485636	625488601												IPR000719, IPR000742, IPR001245, IPR001881, IPR008271, IPR009030, IPR011009, IPR017441, IPR018097, IPR025287	GO:0004672, GO:0005509, GO:0005524, GO:0006468, GO:0030247, GO:0030554, GO:0032550, GO:0032559, GO:0097367
TraesCS4A02G347700		4A	625527404	625530775	Ta.4216.1.S1_at; Ta.4216.1.S1_x_at; Ta.4216.2.S1_a_at; Ta.4216.2.S1_x_at	354.009	8.46764	2656.99	11.3756	2695.46	11.3963	2431.62	11.2477	2514.06	11.2958	IPR007512	GO:0005743, GO:0061617
TraesCS4A02G347800		4A	625531179	625534896												IPR015679, IPR001736, IPR024632	GO:0003824,
TraesCS4A02G347900		4A	625542229	625544105												IPR001810, IPR036047	GO:0005515
TraesCS4A02G348000		4A	625652534	625654321												IPR032675
TraesCS4A02G348100		4A	625685174	625686121												IPR036047, IPR040267	GO:0005515
TraesCS4A02G348200		4A	625758358	625763138
TraesCS4A02G348300		4A	625784421	625785328												IPR007750
TraesCS4A02G348400		4A	625829626	625833607												IPR002885, IPR011990, IPR032867	GO:0005515, GO:0008270
TraesCS4A02G348500		4A	625861941	625864369												IPR039145	GO:0005762
TraesCS4A02G348600		4A	625883414	625887129												IPR000642, IPR003593, IPR003959, IPR003960, IPR005936, IPR027417, IPR037219, IPR041569	GO:0004222, GO:0005524, GO:0006508, GO:0016020, GO:0030554, GO:0032550, GO:0032559
TraesCS4A02G348700		4A	625958605	625962221												IPR000642, IPR003593, IPR003959, IPR003960, IPR005936, IPR027417, IPR037219, IPR041569	GO:0004222, GO:0005524, GO:0006508, GO:0016020, GO:0030554, GO:0032550, GO:0032559, GO:0097367
TraesCS4A02G348800		4A	626011891	626014513												IPR000642, IPR003593, IPR003959, IPR003960, IPR005936, IPR027417, IPR037219, IPR041569	GO:0004222, GO:0005524, GO:0006508, GO:0016020, GO:0030554, GO:0032550, GO:0032559
TraesCS4A02G348900		4A	626013466	626014081
TraesCS4A02G349000		4A	626020076	626023580												IPR000642, IPR003593, IPR003959, IPR003960, IPR005936, IPR027417, IPR037219, IPR041569	GO:0004222, GO:0005524, GO:0006508, GO:0016020, GO:0030554, GO:0032550, GO:0032559, GO:0097367
TraesCS4A02G349100		4A	626063063	626067712	Ta.5939.1.A1_at; Ta.5939.2.S1_at; Ta.5939.3.S1_at	22.0469	4.4625	49.4868	5.62897	56.7465	5.82646	49.5834	5.63178	50.1349	5.64774	IPR000642, IPR003593, IPR003959, IPR005936, IPR027417, IPR037219, IPR041569	GO:0001883, GO:0004222, GO:0005524, GO:0006508, GO:0016020, GO:0030554, GO:0032550, GO:0032559, GO:0097367
TraesCS4A02G349200		4A	626073277	626079291												IPR000642, IPR003593, IPR003959, IPR003960, IPR005936, IPR027417, IPR037219, IPR041569	GO:0004222, GO:0005524, GO:0006508, GO:0016020, GO:0030554, GO:0032550, GO:0032559
TraesCS4A02G349300	BTB/POZ domain-containing protein At2g13690 [Source:Projected from Arabidopsis thaliana (AT2G13690) UniProtKB/Swiss-Prot;Acc:Q9SKH2]	4A	626116016	626121811	TaAffx.27069.1.S1_at; TaAffx.52128.1.S1_at	30.8319	4.94635	120.075	6.9078	102.624	6.68123	135.536	7.08253	148.146	7.21088	IPR038920
TraesCS4A02G349400		4A	626116239	626121811	TaAffx.120106.1.S1_at	10.2894	3.36308	24.6432	4.62312	23.0234	4.52503	12.9254	3.69213	4.7893	2.25981	IPR011042, IPR011659
TraesCS4A02G349500		4A	626164923	626168847												IPR023210, IPR036812
TraesCS4A02G349600		4A	626182929	626183790												IPR002938, IPR018168, IPR036188	GO:0016709, GO:0055114, GO:0071949
TraesCS4A02G484500		4A	738764025	738768727												IPR007658, IPR025315	GO:0016021
TraesCS4A02G484600		4A	738780809	738784462	Ta.14459.1.S1_x_at	280.945	8.13414	344.53	8.42848	231.155	7.85272	237.677	7.89286	203.792	7.67095	IPR011042, IPR011659
TraesCS4A02G484700		4A	738815309	738816883	Ta.12529.1.S1_at; Ta.12529.1.S1_x_at; Ta.25161.1.S1_at; Ta.25161.1.S1_x_at	56.3375	5.81602	117.643	6.87828	67.7086	6.08127	38.8739	5.28073	32.7204	5.03212	IPR002035, IPR032838, IPR036465
TraesCS4A02G484900		4A	738932767	738935633
TraesCS4A02G485100		4A	738980242	738983792												IPR001128, IPR002401, IPR036396	GO:0005506, GO:0016705, GO:0020037, GO:0055114
TraesCS4A02G485200		4A	739022048	739022542
TraesCS4A02G485300		4A	739027364	739039243	Ta.6698.1.S1_at; Ta.6698.2.S1_a_at	239.154	7.9018	909.311	9.82863	1004.74	9.9726	987.297	9.94734	843.673	9.72054	IPR001680, IPR015943, IPR017986, IPR036322	GO:0005515
TraesCS4A02G486100		4A	739520989	739525939	Ta.4062.1.S1_a_at; Ta.4062.2.A1_at	35.1678	5.13618	149.133	7.22045	213.615	7.73887	197.793	7.62785	237.035	7.88895	IPR001117, IPR008972, IPR011706, IPR011707, IPR034273	GO:0005507, GO:0016491, GO:0055114
[truncated: 1,534 more rows]

## Sheet: Table S6
Table S6: Physical position of signficant QTNs on IWGSC RefSeq v1.0
QTLs	MTA	Traits (Dataset)	Chromosome	Consesuous (cM)	IWGSC_v1 (bp)	IWGSC ID
qWSC-1A.1	AX-94583145	Fructose(E02)	1A	54.04	1211885	TraesCS1A02G002300
	AX-95137931	TNSC(E03)	1A	54.04
qWSC-1A.2	AX-94599217	Fructose(RF)	1A	61.06	21624404	TraesCS1A02G039400
qWSC-1A.3	AX-94979481	Glucose(E02), Sucrose(E02)	1A	69.85
qWSC-1A.4	AX-94395004	Fructans(E08)	1A	74.11	299270778
	AX-94399869	TNSC(E08)	1A	74.11	272316170
	AX-94408765	Fructose(E08)	1A	74.11
	AX-94418426	Fructose(RF)	1A	74.11	311806352
	AX-94480929	Fructans(E08), TNSC(E08)	1A	74.11	260835882
	AX-94580118	Fructose(RF)	1A	74.11	312775453	TraesCS1A02G175000
	AX-94604685	Fructose(E02)	1A	74.11
	AX-94623356	Glucose(E02), Sucrose(E02)	1A	74.11	361185365	TraesCS1A02G200600
	AX-94781823	Fructans(E08), TNSC(E08)	1A	74.11	274785621
	AX-94841333	Fructose(E08)	1A	74.11
	AX-94959165	Sucrose(E02)	1A	74.11
	AX-95068712	Fructans(E08), TNSC(E08)	1A	74.11
	AX-95182518	TNSC(E08)	1A	74.11	279832345
	AX-95629860	TNSC(E08)	1A	74.11
	AX-94398706	Fructans(E05), TNSC(E05)	1A	75.74	510366245	TraesCS1A02G319400
	AX-94433739	WSC(E06)	1A	75.74
	AX-94509092	Fructans(E05)	1A	75.74
	AX-94618537	WSC(E06)	1A	75.74	511101975	TraesCS1A02G320500
	AX-94663476	WSC(E06)	1A	75.74	510457328	TraesCS1A02G319900
	AX-95071361	WSC(E06)	1A	75.74
	AX-95246262	WSC(E06)	1A	75.74	508638302
	AX-95657292	WSC(E06)	1A	75.74
qWSC-1A.5	AX-94964616	Fructans(E05), TNSC(E05)	1A	78.02	517415388
	AX-94706964	TNSC(IR)	1A	79.73	521258735	TraesCS1A02G332800
qWSC-1A.6	AX-94492604	Fructose(IR)	1A	81.31	529788828
	AX-94504454	Fructose(IR)	1A	81.31
	AX-94583506	Fructose(IR)	1A	81.31	530236548	TraesCS1A02G340000
	AX-94726800	Fructose(IR)	1A	81.31
	AX-94960090	Fructose(IR)	1A	81.31	530173432	TraesCS1A02G339600
	AX-95137011	Fructose(IR)	1A	81.31	522980571	TraesCS1A02G336300
	AX-95633211	Fructose(IR)	1A	81.31
qWSC-1A.7	AX-94406786	Glucose(E04), Sucrose(E04)	1A	87.93	540056617
	AX-94464571	Fructose(IR)	1A	87.93
	AX-94674333	Fructans(E03)	1A	88.71	551607551	TraesCS1A02G379900
	AX-94690045	Fructose(E05)	1A	88.71
	AX-94822081	Fructose(E05)	1A	88.71
	AX-95204965	Fructose(E05)	1A	88.71
qWSC-1B.1	AX-94400901	Fructans(E05), TNSC(E05)	1B	8.24	13044174	TraesCS1B02G027000
	AX-94569385	Fructose(E07)	1B	8.24
	AX-94638289	TNSC(E05)	1B	8.24
qWSC-1B.2	AX-94470806	Sucrose(E03)	1B	24.64
	AX-94517050	Glucose(E03), Sucrose(E03)	1B	24.64
	AX-94915907	Fructans(E02), TNSC(E02)	1B	24.64	86709734
	AX-94923277	Fructans(DT), TNSC(DT)	1B	24.64	121406332	TraesCS1B02G109400
	AX-94948823	TNSC(E02)	1B	24.64
	AX-95211457	TNSC(E02)	1B	24.64
	AX-94384779	Glucose(RF;E02), Sucrose(RF)	1B	26.22	487425733	TraesCS1B02G279100
	AX-94495814	Fructans(DT), TNSC(DT)	1B	26.22	540847974
	AX-94906568	Fructose(E02)	1B	26.22	456975112	TraesCS1B02G259500
	AX-94962832	Fructose(RF)	1B	26.22
	AX-94995102	Fructans(DT), TNSC(DT)	1B	26.22	540729222
qWSC-1B.3	AX-95165363	Fructans(DT), TNSC(DT)	1B	32.17
	AX-94507852	Fructans(DT), TNSC(DT)	1B	33.75	543085967	TraesCS1B02G318700
	AX-94620208	TNSC(DT)	1B	33.75	542135988	TraesCS1B02G317100
	AX-94644908	Fructans(DT), TNSC(DT)	1B	33.75
qWSC-1B.4	AX-94682892	Fructans(DT), TNSC(DT)	1B	35.34	551009907	TraesCS1B02G325000
	AX-95152246	Fructose(RF)	1B	35.34	559575971	TraesCS1B02G333100
	AX-95220675	TNSC(DT)	1B	35.34	562212775
	AX-95630190	TNSC(DT)	1B	35.71
qWSC-1B.5	AX-94870113	WSC(IR)	1B	38.86	566831296	TraesCS1B02G339000
	AX-95119047	WSC(IR)	1B	38.86	566831431	TraesCS1B02G339000
	AX-95161189	WSC(IR)	1B	38.86
qWSC-1B.6	AX-94439319	Glucose(E04), Sucrose(E04)	1B	75.01
	AX-94766122	Glucose(E04), Sucrose(E04)	1B	75.01	643102204	TraesCS1B02G419800
	AX-94783957	Sucrose(E04)	1B	75.01	643101623	TraesCS1B02G419800
qWSC-1B.7	AX-94759528	Fructose(E01)	1B	97.59
qWSC-1B.8	AX-94727795	Glucose(E04), Sucrose(E04)	1B	107.81	660965590	TraesCS1B02G439200
qWSC-1B.9	AX-94604435	Fructose(DT)	1B	111.86
	AX-94673495	Fructose(DT)	1B	111.86	664787253	TraesCS1B02G443600
qWSC-1B.10	AX-95633864	Sucrose(DT)	1B	126.19
qWSC-1B.11	AX-94946032	Glucose(RF)	1B	147.26
qWSC-1D.1	AX-94939596	Glucose(E08), Sucrose(E08)	1D	137.62	38781551	TraesCS1D02G058900
qWSC-2A.1	AX-94910560	Glucose(E07)	2A	1.59
qWSC-2A.2	AX-94459198	Glucose(E06), Sucrose(E06)	2A	83.23
	AX-94517392	Glucose(E06), Sucrose(E06)	2A	83.23	315768089
	AX-94852639	Glucose(E06), Sucrose(E06)	2A	83.23	408773550	TraesCS2A02G259900
	AX-94903997	Sucrose(E06)	2A	83.23	146954798	TraesCS2A02G185700
	AX-94964907	WSC(E03)	2A	83.23
	AX-94966169	Glucose(E06), Sucrose(E06)	2A	83.23
	AX-95021775	Glucose(E06), Sucrose(E06)	2A	83.23
	AX-94411894	Glucose(IR), Sucrose(IR)	2A	83.6	553482409	TraesCS2A02G323300
	AX-94582262	Fructose(IR)	2A	83.6	556106342	TraesCS2A02G325900
	AX-94902101	Fructose(IR)	2A	83.6	556106396	TraesCS2A02G325900
	AX-94665408	Fructose(IR)	2A	84.36
qWSC-2A.3	AX-94416062	Sucrose(E07)	2A	164.09	748542310	TraesCS2A02G531500
qWSC-2A.4	AX-95135556	Glucose(E04;DT), Sucrose(E04;DT)	2A	178.03	764821201	TraesCS2A02G564900
	AX-94444084	Glucose(E04), Sucrose(E04)	2A	179.61
	AX-94560557	Glucose(E04;DT), Sucrose(E04;DT)	2A	179.61
	AX-94832247	Glucose(E04), Sucrose(E04)	2A	179.61
	AX-94865722	Glucose(E04;DT), Sucrose(E04;DT)	2A	179.61	765292309
	AX-94910470	Glucose(DT), Sucrose(DT)	2A	179.61	763695272	TraesCS2A02G562500
	AX-95114107	Glucose(E04), Sucrose(E04)	2A	179.61
qWSC-2B.1	AX-94754932	WSC(E08)	2B	27.22
	AX-95163397	WSC(E07)	2B	27.22	29039811
	AX-95630341	WSC(E07)	2B	27.22
qWSC-2B.2	AX-94430027	WSC(IR)	2B	75.45
	AX-94500252	WSC(IR)	2B	76.24	89491845	TraesCS2B02G122000
	AX-94759687	WSC(IR)	2B	76.24
	AX-94838738	WSC(IR)	2B	76.24
	AX-94856684	WSC(IR)	2B	76.24	88928827	TraesCS2B02G121400
	AX-94865451	WSC(IR)	2B	76.24	89548302	TraesCS2B02G122200
	AX-95231094	WSC(IR)	2B	76.24
	AX-95235132	WSC(IR)	2B	76.24
	AX-94852847	WSC(DT)	2B	76.38	72896404	TraesCS2B02G111100
	AX-94860010	WSC(DT)	2B	76.38	72610551	TraesCS2B02G110800
	AX-95138506	WSC(DT)	2B	76.38	72815939	TraesCS2B02G111000
	AX-94614804	WSC(DT)	2B	77.03	72811882	TraesCS2B02G111000
	AX-94621282	WSC(DT)	2B	77.03
	AX-95138084	WSC(DT)	2B	77.03
qWSC-2B.3	AX-94747151	Fructose(E08)	2B	83.31
	AX-94891219	Fructose(E08)	2B	83.31
	AX-94966084	Fructose(E08)	2B	83.31
	AX-94975611	Fructose(E08)	2B	83.31	143136556	TraesCS2B02G170200
	AX-95204493	Fructose(E08)	2B	83.31
qWSC-2B.4	AX-94696960	Fructose(E02)	2B	89.05
	AX-95180258	Fructose(E02)	2B	89.05
qWSC-2B.5	AX-94415371	TNSC(RF)	2B	102.12	553873829	TraesCS2B02G390000
	AX-94491160	Fructose(E04)	2B	102.12	561228914	TraesCS2B02G395700
	AX-94386142	TNSC(IR)	2B	103.81	654485976
	AX-94587505	Fructose(E03)	2B	103.81
qWSC-2B.6	AX-94565831	Fructose(E08)	2B	104.59	719168895	TraesCS2B02G524700
	AX-94812268	Fructans(DT), TNSC(DT)	2B	104.59	747125605
	AX-95105170	Fructose(E08)	2B	104.59
	AX-94708698	Fructose(DT)	2B	105.38	751322544	TraesCS2B02G556600
qWSC-2D.1	AX-94485462	WSC(E04)	2D	161.27
	AX-95147056	WSC(E04)	2D	161.27	65717874	TraesCS2D02G116900
qWSC-2D.2	AX-94499721	WSC(E04)	2D	170.23	77381475	TraesCS2D02G132600
qWSC-2D.3	AX-94730452	WSC(E04)	2D	201.08	76638698	TraesCS2D02G131200
	AX-94799113	WSC(E04)	2D	201.08	76580047
	AX-94488983	WSC(E04)	2D	201.22	76549003	TraesCS2D02G131000
qWSC-2D.4	AX-95659061	WSC(E04)	2D	213.76
qWSC-2D.5	AX-94512149	Fructose(E05)	2D	290.12	647278325	TraesCS2D02G592100
qWSC-2D.6	AX-94433535	Fructans(E08), TNSC(E08)	2D	295.13
	AX-94589168	Fructose(RF), Fructans(E05), TNSC(E05)	2D	295.13	647665703	TraesCS2D02G592600
	AX-95230892	Fructans(E08), TNSC(E08)	2D	295.13	645054806
qWSC-3A.1	AX-95148936	Fructose(IR)	3A	42.7
qWSC-3A.2	AX-94401383	Fructans(E02), TNSC(E02)	3A	70.64
	AX-94582729	Fructans(E02), TNSC(E02)	3A	70.64	134601291	TraesCS3A02G149500
	AX-94972883	Fructans(E02), TNSC(E02)	3A	70.64	132581410	TraesCS3A02G149000
	AX-95011264	TNSC(E02)	3A	70.64
	AX-94389041	Fructans(E02), TNSC(E02)	3A	71.01
	AX-94433044	Fructans(E02), TNSC(E02)	3A	71.01	137608719	TraesCS3A02G150500
	AX-94453523	Fructans(E02), TNSC(E02)	3A	71.01
	AX-94710575	Fructans(E02), TNSC(E02)	3A	71.01	142578291	TraesCS3A02G151900
	AX-94884816	Fructans(E02), TNSC(E02)	3A	71.01	140043285	TraesCS3A02G151200
	AX-95080387	Fructans(E02), TNSC(E02)	3A	71.01	137608592	TraesCS3A02G150500
qWSC-3A.3	AX-94472299	Fructans(DT;E04), TNSC(DT)	3A	77.94	480432862	TraesCS3A02G258500
	AX-94606333	Fructans(DT), TNSC(DT)	3A	77.94	479782399	TraesCS3A02G258100
	AX-94709825	WSC(E07)	3A	77.94	487458205
	AX-94765551	Fructans(DT), TNSC(DT)	3A	77.94
	AX-94941647	Fructans(E08), TNSC(E08)	3A	77.94	481514846	TraesCS3A02G259200
	AX-94943204	Fructans(DT), TNSC(DT)	3A	77.94	480433970	TraesCS3A02G258500
	AX-95147942	Fructans(DT), TNSC(DT)	3A	77.94
	AX-95204178	Fructans(DT;E04), TNSC(DT;E04)	3A	77.94	479782760	TraesCS3A02G258100
	AX-95225454	Fructans(DT;E04), TNSC(DT)	3A	77.94
qWSC-3A.4	AX-94507107	WSC(E06)	3A	84.43	535194640	TraesCS3A02G301500
	AX-94661464	WSC(E06)	3A	84.43	535198752	TraesCS3A02G301600
	AX-95136005	Fructose(E03)	3A	84.43	559265178	TraesCS3A02G318000
qWSC-3A.5	AX-94481094	Glucose(E07), Sucrose(E07)	3A	115.19	613393040	TraesCS3A02G364600
	AX-94941121	Sucrose(E07)	3A	115.9	611702554	TraesCS3A02G363000
qWSC-3A.6	AX-94701839	Fructans(DT), TNSC(DT)	3A	127.08	650057820	TraesCS3A02G406000
qWSC-3A.7	AX-94501648	TNSC(DT)	3A	130.15	667793607	TraesCS3A02G425500
	AX-94850054	TNSC(DT)	3A	130.15	669567947	TraesCS3A02G426400
	AX-95630312	Fructans(DT), TNSC(DT)	3A	130.15
qWSC-3A.8	AX-94498500	Fructans(E03), TNSC(E03)	3A	198.54
qWSC-3A.9	AX-94563363	WSC(E02)	3A	229.06
qWSC-3A.10	AX-94700643	Fructans(E02), TNSC(E02), WSC(E02)	3A	250.41	739147183	TraesCS3A02G523700
qWSC-3A.11	AX-94447466	WSC(IR)	3A	253.58
qWSC-3A.12	AX-94838498	Fructose(E01)	3A	258.94	743757924	TraesCS3A02G530600
qWSC-3B.1	AX-94730299	Fructose(E01)	3B	0.79
	AX-95180632	Fructose(E01)	3B	0.79	4468830
qWSC-3B.2	AX-94426633	Fructans(E07), TNSC(E07)	3B	83.69
	AX-94542642	Sucrose(E07), Fructans(E07), TNSC(E07)	3B	83.69	110228263	TraesCS3B02G129400
	AX-94721496	Fructose(E04)	3B	83.69	148546032	TraesCS3B02G155900
	AX-94850105	Fructose(E04)	3B	83.69
	AX-94902398	Fructans(E07), TNSC(E07)	3B	83.69
	AX-95131118	Fructose(E04)	3B	83.69
	AX-95155185	Fructose(E04)	3B	83.69	117548966
	AX-95210006	Fructose(E04)	3B	83.69
	AX-94607867	Glucose(IR), Sucrose(IR)	3B	84.9	478077054	TraesCS3B02G298100
	AX-94629147	Fructans(E07), TNSC(E07)	3B	84.9
	AX-94639947	WSC(E06)	3B	84.9	241394999	TraesCS3B02G206100
	AX-94674372	WSC(E06)	3B	84.9
	AX-95632086	WSC(E06)	3B	84.9
	AX-94449277	Fructose(E04)	3B	85.27	257515415	TraesCS3B02G216600
	AX-94496337	WSC(E06)	3B	85.27	250465776	TraesCS3B02G211300
	AX-94504455	Glucose(E01), Sucrose(E01)	3B	85.27	502921831	TraesCS3B02G313000
	AX-94532320	WSC(E06)	3B	85.27	250574936	TraesCS3B02G211500
	AX-94599954	WSC(E06)	3B	85.27	245509557	TraesCS3B02G209200
	AX-94620197	Fructans(E07), TNSC(E07)	3B	85.27	414474518
	AX-94671810	Fructans(E07), TNSC(E07), WSC(E06)	3B	85.27
	AX-94786575	Glucose(E01), Sucrose(E01)	3B	85.27	499450769	TraesCS3B02G310900
	AX-94843023	Fructose(E04)	3B	85.27	276850351	TraesCS3B02G221700
	AX-94876042	Glucose(E05), Sucrose(E05), TNSC(E05)	3B	85.27	592609380	TraesCS3B02G376300
	AX-94879889	WSC(E06)	3B	85.27	250279360	TraesCS3B02G211200
	AX-94880272	Fructose(E04)	3B	85.27
	AX-94916900	Fructose(E04)	3B	85.27
	AX-94943216	Fructose(E04)	3B	85.27	252595780	TraesCS3B02G212900
	AX-95003780	Fructose(E06)	3B	85.27	581336566	TraesCS3B02G369300
	AX-95008727	Fructans(E07), TNSC(E07)	3B	85.27
	AX-95101481	WSC(E06)	3B	85.27
	AX-95192766	Fructose(E04)	3B	85.27	256254109	TraesCS3B02G215300
	AX-95222171	Fructose(E06)	3B	85.27
qWSC-3B.3	AX-94461641	Fructose(E08)	3B	101.87	703333380	TraesCS3B02G459900
	AX-95232057	WSC(E08)	3B	102.29	722353202	TraesCS3B02G473000
qWSC-3B.4	AX-94481626	Glucose(IR), Sucrose(IR), WSC(DT)	3B	127.67
qWSC-3B.5	AX-94777130	TNSC(E03)	3B	170.31	771178846
qWSC-3D.1	AX-94637066	WSC(DT)	3D	1.69
qWSC-3D.2	AX-94524892	WSC(E07)	3D	91.95
	AX-94752046	WSC(E07)	3D	91.95
	AX-94845398	WSC(E07)	3D	91.95
	AX-95180153	WSC(E07)	3D	91.95
qWSC-3D.3	AX-94968108	WSC(E04)	3D	158.35	596890133	TraesCS3D02G512300
qWSC-3D.4	AX-94896736	Glucose(E08), Sucrose(E08), TNSC(E08)	3D	175.97	609626754	TraesCS3D02G535400
qWSC-4A.1	AX-94776807	Glucose(E05), Sucrose(E05)	4A	162.35	625264531	TraesCS4A02G346900
qWSC-4A.2	AX-94619716	Glucose(E06), Sucrose(E06)	4A	214.31	739763001	TraesCS4A02G487000
qWSC-4B.1	AX-94546364	WSC(IR)	4B	21.63	657172059	TraesCS4B02G371700
	AX-94556198	WSC(IR)	4B	21.63
	AX-94577088	WSC(IR)	4B	21.63
	AX-94717107	WSC(IR)	4B	21.63
	AX-95123139	WSC(IR)	4B	21.63
	AX-95192358	WSC(IR)	4B	21.63	657295401	TraesCS4B02G372400
qWSC-4B.2	AX-95130980	Fructans(E04), TNSC(E04)	4B	86.54
	AX-95169219	WSC(E03)	4B	86.54	538266897
	AX-95189919	WSC(E03)	4B	86.54	537479475	TraesCS4B02G266000
qWSC-4B.3	AX-95085087	WSC(E04)	4B	106.27	21316632	TraesCS4B02G028800
qWSC-5A.1	AX-94610810	Fructans(E01), TNSC(E01)	5A	13.46
	AX-95009904	Fructans(E01), TNSC(E01)	5A	13.83	618956850
qWSC-5A.2	AX-94438404	Fructose(E01)	5A	43.27	9840246
	AX-94460229	Fructose(E01)	5A	43.27	9840279
	AX-94497226	Fructose(E01)	5A	43.27
	AX-95079355	Fructose(E01)	5A	44.2
qWSC-5A.3	AX-94946660	Glucose(E07), Sucrose(E07)	5A	47.82	682931942	TraesCS5A02G521700
qWSC-5A.4	AX-94534858	Glucose(E04), Sucrose(E04)	5A	69
qWSC-5A.5	AX-94909029	Glucose(E06), Sucrose(E06)	5A	72.22
qWSC-5A.6	AX-95139065	Glucose(RF), Sucrose(RF)	5A	81.74	487336146
qWSC-5A.7	AX-94535450	Fructans(E02)	5A	104.28	561175296	TraesCS5A02G359100
	AX-94930932	Fructans(E02), TNSC(E02)	5A	104.87	563456296	TraesCS5A02G362600
qWSC-5B.1	AX-94536572	Glucose(E04)	5B	16.31
	AX-94915562	Glucose(E04)	5B	16.31	167293601	TraesCS5B02G111700
qWSC-5B.2	AX-94711329	Fructans(E03), TNSC(E03)	5B	45.36	38765413
	AX-94761289	Fructans(E03), TNSC(E03)	5B	45.36
	AX-95251547	WSC(E07)	5B	45.36
qWSC-5B.3	AX-94729346	Glucose(E04)	5B	52.43	188800592	TraesCS5B02G114900
	AX-94731059	Glucose(E04)	5B	52.43	157383449	TraesCS5B02G110000
	AX-94605952	Fructans(E03), TNSC(E03)	5B	53.01	70400018	TraesCS5B02G062700
	AX-94727027	TNSC(E03)	5B	53.01
	AX-94430767	Glucose(E04)	5B	54.23	243433888	TraesCS5B02G130900
qWSC-5B.4	AX-94593432	TNSC(E03)	5B	55.01
	AX-94419960	Glucose(E07;IR), Sucrose(E07;IR)	5B	55.29
	AX-94433869	TNSC(E03)	5B	55.29
	AX-94439232	Fructose(E03)	5B	55.29	287624187
	AX-94454107	Glucose(E07), Sucrose(E07)	5B	55.29	381040389
	AX-94484139	Fructose(E03)	5B	55.29	289567049	TraesCS5B02G156900
	AX-94490070	Glucose(E07), Sucrose(E07;IR)	5B	55.29	381715059	TraesCS5B02G210800
	AX-95105243	Glucose(E07;IR), Sucrose(E07;IR)	5B	55.29	380319776	TraesCS5B02G210100
	AX-94562038	Fructans(E03), TNSC(E03)	5B	56.42	392490076
qWSC-5B.5	AX-94523793	TNSC(E03)	5B	92.95
qWSC-5B.6	AX-94488630	Fructose(E02)	5B	97.55
qWSC-5B.7	AX-94797597	Fructans(E01), TNSC(E01)	5B	158.47
	AX-94504637	TNSC(E01)	5B	160.16	548435316
	AX-94923750	Fructans(E01), TNSC(E01)	5B	160.16
qWSC-5B.8	AX-94673667	WSC(E04)	5B	163.54
qWSC-5B.9	AX-95108292	Sucrose(E03)	5B	186.7
qWSC-5B.10	AX-94673840	Fructose(E02)	5B	201.42
qWSC-5B.11	AX-94822453	Fructans(E02)	5B	210.93	639737446	TraesCS5B02G465200
qWSC-5B.12	AX-94436033	Fructose(IR)	5B	219.91	650053491	TraesCS5B02G478200
	AX-94492507	Fructose(E02)	5B	219.91	652100255	TraesCS5B02G479500
	AX-94668872	Fructose(IR)	5B	219.91	651212382
	AX-94436366	Fructose(E02)	5B	220.94	652634943	TraesCS5B02G480100
	AX-94444933	Fructose(E02)	5B	220.94	652478753	TraesCS5B02G479900
	AX-95090344	Fructose(E02)	5B	220.94	652100791	TraesCS5B02G479500
qWSC-5B.13	AX-94559013	Fructans(E08), TNSC(E08)	5B	232.28	662035734	TraesCS5B02G494400
	AX-94623577	Fructans(E08)	5B	232.28	662455799	TraesCS5B02G494500
	AX-94402018	Fructose(E04)	5B	234.13	671301137	TraesCS5B02G505600
qWSC-5B.14	AX-94725198	Fructose(E01)	5B	273.57	698453437	TraesCS5B02G546200
	AX-94783697	Fructose(E01)	5B	273.57
qWSC-5B.15	AX-94685470	Fructose(E01)	5B	275.87
	AX-94745281	Fructose(E01)	5B	277.56
	AX-95231332	Fructose(E01)	5B	277.56
qWSC-5D.1	AX-94737415	Fructans(E06), TNSC(E06)	5D	1.58
	AX-94923716	Fructans(E06), TNSC(E06)	5D	1.58
	AX-95078137	Fructans(E06), TNSC(E06)	5D	1.58
qWSC-5D.2	AX-94649755	Glucose(E06), Sucrose(E06)	5D	4.8
qWSC-6A.1	AX-94995255	Fructans(DT), TNSC(DT)	6A	0
	AX-95685387	Glucose(DT;E04), Sucrose(DT;E04)	6A	0
qWSC-6A.2	AX-94543047	WSC(RF)	6A	26.51
	AX-94556117	Glucose(E08), Sucrose(E08), Fructans(E08), TNSC(E08)	6A	26.51	23373085	TraesCS6A02G044800
qWSC-6A.3	AX-94534539	Fructans(E04), TNSC(E04)	6A	102.4	497462168	TraesCS6A02G270900
	AX-94585912	Fructans(E04), TNSC(E04)	6A	102.4
	AX-94836678	Fructans(E04)	6A	103.98	499007809	TraesCS6A02G272300
	AX-95629023	Fructans(E04), TNSC(E04)	6A	103.98
qWSC-6A.4	AX-94651692	Glucose(IR), Sucrose(IR)	6A	120.35
	AX-94746667	Glucose(IR), Sucrose(IR)	6A	120.35
qWSC-6A.5	AX-94424668	Glucose(DT), Sucrose(DT)	6A	221.75	612329191	TraesCS6A02G407700
	AX-94770913	Glucose(DT), Sucrose(DT)	6A	221.75	611808086	TraesCS6A02G406500
	AX-95147877	Glucose(E08)	6A	221.75	615468963	TraesCS6A02G416500
qWSC-6B.1	AX-94446754	Fructans(E08), TNSC(E08)	6B	35.83	27999659	TraesCS6B02G047800
qWSC-6B.2	AX-94426619	Glucose(E03)	6B	45.96	42500537	TraesCS6B02G064200
	AX-94522639	Sucrose(E01)	6B	45.96
qWSC-6B.3	AX-94393025	Fructose(E05)	6B	62.83
	AX-94553893	Glucose(E05), Sucrose(E05)	6B	62.83	169235875	TraesCS6B02G163000
	AX-94704405	Fructans(E02), TNSC(E02)	6B	62.83	578401405	TraesCS6B02G328600
	AX-95023059	Glucose(IR), Sucrose(IR)	6B	62.83
qWSC-6B.4	AX-94950339	TNSC(DT)	6B	81.39	678739547	TraesCS6B02G402600
qWSC-6B.5	AX-94759235	WSC(E03)	6B	131.81	708020687	TraesCS6B02G447500
qWSC-6D.1	AX-94413225	WSC(E06;RF)	6D	17.65	467050030	TraesCS6D02G392900
	AX-94426796	WSC(E06;RF)	6D	17.65	467091321
	AX-94803211	WSC(IR)	6D	17.65
	AX-94921095	WSC(E06;RF)	6D	17.65	466331266	TraesCS6D02G391300
	AX-95120751	WSC(E06;RF)	6D	17.65	466268739	TraesCS6D02G391200
	AX-95197613	WSC(E06)	6D	17.65	466331276	TraesCS6D02G391300
qWSC-6D.2	AX-94437232	Glucose(RF), Sucrose(RF)	6D	83.87	307878815	TraesCS6D02G217900
	AX-94631103	Glucose(RF), Sucrose(RF), Fructans(RF), TNSC(RF)	6D	83.87
	AX-94821347	TNSC(RF)	6D	83.87
	AX-94916179	Glucose(RF;E06), Sucrose(RF), TNSC(RF)	6D	83.87
qWSC-7A.1	AX-94573457	TNSC(E06)	7A	27.21	447500474	TraesCS7A02G313800
	AX-94821252	Fructans(E06), TNSC(E06)	7A	27.21
	AX-94888880	Glucose(E06), Sucrose(E06), Fructans(E06), TNSC(E06)	7A	27.21	263177020	TraesCS7A02G264300
	AX-95153090	Glucose(E06), Sucrose(E06), Fructans(E06), TNSC(E06)	7A	27.21
	AX-95193824	Fructans(E06), TNSC(E06)	7A	27.21	448098049	TraesCS7A02G314000
	AX-95629557	Fructans(E06), TNSC(E06)	7A	27.21
qWSC-7A.2	AX-94428682	TNSC(E06), WSC(E07)	7A	29.86
	AX-94505773	Fructose(DT)	7A	29.86
	AX-94506129	Fructose(DT)	7A	29.86	635495384	TraesCS7A02G441400
	AX-94507941	WSC(E07)	7A	29.86	2694426	TraesCS7A02G005100
	AX-94513729	WSC(E05)	7A	29.86
	AX-94527434	Fructose(DT)	7A	29.86
	AX-94586454	Sucrose(DT)	7A	29.86
	AX-94648060	Fructose(E06)	7A	29.86	1739677
	AX-94682492	Fructose(DT)	7A	29.86	83286879	TraesCS7A02G129300
	AX-94735683	WSC(E05)	7A	29.86	76398871	TraesCS7A02G118400
	AX-94749619	Fructose(E06)	7A	29.86	3841367	TraesCS7A02G008500
	AX-94801490	Fructose(DT)	7A	29.86	11959623	TraesCS7A02G029300
	AX-95083163	Fructose(E06)	7A	29.86	1719121	TraesCS7A02G003100
	AX-95200397	Fructose(E06)	7A	29.86	1746111	TraesCS7A02G003200
	AX-95224185	Fructose(RF)	7A	29.86	3007974	TraesCS7A02G006300
	AX-95231996	Fructose(E06)	7A	29.86	3849819	TraesCS7A02G008600
	AX-95632295	Fructose(DT)	7A	29.86
	AX-95683847	Fructose(DT)	7A	29.86
	AX-94535557	Fructans(E06), TNSC(E06)	7A	29.9
	AX-94627932	Fructans(E06), TNSC(E06)	7A	29.9	540057150
	AX-95652683	Fructans(DT)	7A	29.9
	AX-94536859	WSC(E06)	7A	30.66	206690963
qWSC-7A.3	AX-94398361	Fructans(E02)	7A	33.72	617684953
qWSC-7A.4	AX-94599642	Fructose(E01)	7A	109.61	675113804	TraesCS7A02G483600
qWSC-7A.5	AX-95111986	WSC(E06;RF)	7A	113.4
	AX-95121537	WSC(IR)	7A	113.4
qWSC-7A.6	AX-94394242	Fructose(DT)	7A	187.43
qWSC-7A.7	AX-94799912	Fructose(E03)	7A	193.85
qWSC-7B.1	AX-94469114	Glucose(E05), Sucrose(E05)	7B	30.48	708558581	TraesCS7B02G444100
	AX-94807717	Glucose(E05), Sucrose(E05)	7B	30.48	709514838	TraesCS7B02G446300
	AX-94819762	Glucose(E05), Sucrose(E05), TNSC(E06)	7B	30.48
	AX-94859831	Glucose(E05), Sucrose(E05)	7B	30.48	709514926	TraesCS7B02G446300
	AX-94874561	Glucose(E05), Sucrose(E05), Fructans(E06), TNSC(E06)	7B	30.48	709515301	TraesCS7B02G446300
	AX-95153421	Glucose(E05), Sucrose(E05)	7B	31.11
	AX-95238582	Glucose(E05), Sucrose(E05)	7B	31.11	708951745	TraesCS7B02G444600
qWSC-7B.2	AX-94457721	Glucose(E05), Sucrose(E05)	7B	34.33	700541817
qWSC-7B.3	AX-94433504	WSC(E08)	7B	92.74
	AX-95175842	Fructose(RF)	7B	92.74	658199659
qWSC-7B.4	AX-94383753	Fructans(E08), TNSC(E08)	7B	96.68	644907027
qWSC-7B.5	AX-94755097	Fructose(E08)	7B	116.51
qWSC-7B.6	AX-94511428	TNSC(E02)	7B	130.53
	AX-94853061	Sucrose(IR)	7B	132.02
	AX-94431804	Glucose(E02), Sucrose(E02)	7B	132.83
	AX-94590847	Sucrose(E02)	7B	132.83	568489237	TraesCS7B02G318400
	AX-94619468	Glucose(E02), Sucrose(E02)	7B	132.83	569422618
	AX-94716438	Fructans(E08), TNSC(E08)	7B	132.83	553628502	TraesCS7B02G309400
	AX-94786548	Fructans(E08), TNSC(E08)	7B	132.83
	AX-94946024	Glucose(E02), Sucrose(E02)	7B	132.83	568663823
	AX-95129629	Fructans(E08), TNSC(E08)	7B	132.83	553322684
	AX-95195100	Fructans(E08), TNSC(E08)	7B	132.83
	AX-95217675	Glucose(E02), Sucrose(E02)	7B	132.83	568497254	TraesCS7B02G318500
	AX-95629493	Glucose(E02), Sucrose(E02)	7B	132.83
	AX-95631008	Glucose(E02), Sucrose(E02)	7B	132.83
	AX-95653765	Glucose(E02), Sucrose(E02)	7B	132.83
qWSC-7D.1	AX-94736889	Fructose(DT)	7D	17.58
qWSC-7D.2	AX-95122768	Glucose(E08)	7D	129.37	511230383	TraesCS7D02G396800

## Sheet: Table S7
Table S7: ReviGO based summarisation of ontology of genes reported with in the 1Mb region of significant QTNs
GO ID	GO Term	Description	frequency	X-axis	Y-axis	value	Uniqueness	Dispensability	Representative	Eliminated
GO:0016021	Cellular component	integral component of membrane	0.285	1.53	-0.173	487	0.891	0.318	16021	0
GO:0016020	Cellular component	membrane	0.4253	0.711	2.017	203	0.994	0	16020	0
GO:0005634	Cellular component	nucleus	0.2605	1.408	2.76	186	0.886	0.099	5634	0
GO:0005737	Cellular component	cytoplasm	0.4859	0.778	2.616	77	0.924	0.121	5737	0
GO:0005576	Cellular component	extracellular region	0.0825	0.41	1.371	56	0.99	0	5576	0
GO:0005840	Cellular component	ribosome	0.0251	-4.406	-2.874	44	0.524	0	5840	0
GO:0009507	Cellular component	chloroplast	0.1264	4.13	0.022	44	0.795	0.596	9507	0
GO:0005886	Cellular component	plasma membrane	0.1487	1.53	1.333	42	0.884	0.539	5886	0
GO:0005829	Cellular component	cytosol	0.1196	3.453	-0.016	26	0.845	0.183	5829	0
GO:0005739	Cellular component	mitochondrion	0.0737	3.674	0.892	24	0.838	0.224	5739	0
GO:0000786	Cellular component	nucleosome	0.0025	-3.369	-4.98	20	0.596	0.464	786	0
GO:0005618	Cellular component	cell wall	0.0387	-0.055	2.387	13	0.943	0.014	5618	0
GO:0012505	Cellular component	endomembrane system	0.1171	0.405	1.253	13	0.967	0.018	12505	0
GO:0009536	Cellular component	plastid	0.1301	3.593	0.371	13	0.827	0.255	9536	0
GO:0005694	Cellular component	chromosome	0.0197	-0.867	-0.65	13	0.788	0.59	5694	0
GO:0005623	Cellular component	cell	0.7937	0.495	1.442	12	0.998	0	5623	0
GO:0005622	Cellular component	intracellular	0.6911	0.502	1.686	12	0.965	0.038	5622	0
[truncated: 1,217 more rows]

## Sheet: Table S8
Table S8: List of genes prioritsed based on knowledge, differential gene expression and co-regulatory networks
[truncated: 211 more rows]

[truncated: 3 more sheets: Table S9, Table S10, Table S11]
